# Supplementary material for: iMethyl-PseAAC: Identification of Protein Methylation Sites via a Pseudo Amino Acid Composition Approach
Source: Hindawi journal article supplement (doi:10.1155/2014/947416), 2014-01-01
Supplement: f1 [file 947416.f1.zip]

**Online Supporting Information S3. Benchmark dataset used for studying the Arg-methylation.** It contains 1,481 samples, of which 185 are positive and 1,296 negative. These data were extracted from UniProtKB/Swiss-Prot database (version UniProt release 2013\_06).

**(A) List of 185 positive Arg-methylation sites and sequence**

| Sample # | Protein ID | Site | Sequences    |
|----------|------------|------|--------------|
| 1        | Q9NR22     | 73   | EEMTSRDYYFD  |
| 2        | Q9UBL3     | 296  | SSGKGRGAKRK  |
| 3        | Q92934     | 94   | EPSPFRRGRSRS |
| 4        | Q92934     | 96   | SPFRGRSRSAP  |
| 5        | Q7Q2B7     | 478  | DAQGARNAVNL  |
| 6        | P11911     | 198  | YEDISRGLQGT  |
| 7        | Q09472     | 2142 | QAGVQRAGLPQ  |
| 8        | P03372     | 260  | IRKDRRGGML   |
| 9        | Q01844     | 300  | SGPDNRGRGRG  |
| 10       | Q01844     | 302  | PDNRGRGRGGF  |
| 11       | Q01844     | 304  | NRGRGRGGFDR  |
| 12       | Q01844     | 309  | RGGFDRGGMSR  |
| 13       | Q01844     | 314  | RGGMSRGGRGG  |
| 14       | Q01844     | 317  | MSRGRGGGRG   |
| 15       | Q01844     | 321  | GRGGGRGGMGS  |
| 16       | Q01844     | 455  | PMNSMRGGGLPP |
| 17       | Q01844     | 464  | PPREGRGMPPP  |
| 18       | Q01844     | 471  | MPPPLRGGPGG  |
| 19       | Q01844     | 490  | GRMGRGGDRG   |
| 20       | Q01844     | 494  | GRGGDRGGFPP  |
| 21       | Q01844     | 500  | GGFPPRGRGRS  |
| 22       | Q01844     | 503  | PPRGRGRSRGN  |
| 23       | Q01844     | 506  | GPRGRGNPSG   |
| 24       | Q01844     | 563  | PPGGDRGRGGP  |
| 25       | Q01844     | 565  | GGDRGRGGPGG  |
| 26       | Q01844     | 572  | GPGGMRGGRGG  |
| 27       | Q01844     | 575  | GMRGGRGGMLD  |
| 28       | Q01844     | 581  | GGLMDRGGPGG  |
| 29       | Q01844     | 589  | PGGMFRGGRGG  |
| 30       | Q01844     | 592  | MFRGGRGGDRG  |
| 31       | Q01844     | 596  | GRGGDRGGFRG  |
| 32       | Q01844     | 600  | DRGGFRGGRGM  |
| 33       | Q01844     | 603  | GFRGGRGMDRG  |
| 34       | Q01844     | 607  | GRGMDRGGFGG  |
| 35       | Q01844     | 615  | FGGGRGGPGG   |
| 36       | Q01844     | 633  | QMGGRRGGRGG  |
| 37       | Q01844     | 636  | GRRGGRGGPGK  |
| 38       | P22509     | 8    | PGFSPRGGGFG  |
| 39       | P22509     | 15   | GGFGGRGGFGD  |
| 40       | P22509     | 21   | GGFGDRGGRGG  |
| 41       | P22509     | 24   | GDRGGRGGGRG  |
| 42       | P22509     | 28   | GRGGRRGGRGG  |

|    |        |     |              |
|----|--------|-----|--------------|
| 43 | P22509 | 31  | GGRGGRGGFGG  |
| 44 | P35637 | 242 | GGYEPGRGGG   |
| 45 | P35637 | 244 | YEPRGRGGGRG  |
| 46 | P35637 | 251 | GGRGGRGGMGG  |
| 47 | P35637 | 259 | MGGSDRGGFNK  |
| 48 | P35637 | 377 | RADFNRRGGNG  |
| 49 | P35637 | 383 | GGNGRGGRGR   |
| 50 | P35637 | 386 | NGRGGRRGGP   |
| 51 | P35637 | 388 | RGGRRGGPMG   |
| 52 | P35637 | 394 | GGPMRGGYGG   |
| 53 | P35637 | 407 | SGGGRRGGFPS  |
| 54 | P35637 | 473 | YGDDRGGRRGG  |
| 55 | P35637 | 476 | DRRGGRRGGYDR |
| 56 | P35637 | 481 | RGGYDRGGYRG  |
| 57 | P35637 | 485 | DRGGYRGRGGD  |
| 58 | P35637 | 487 | GGYRRGGDRG   |
| 59 | P35637 | 495 | DRGGFRGGRRGG |
| 60 | P35637 | 498 | GFRGGRRGGDR  |
| 61 | P35637 | 503 | RGGDRGGFGP   |
| 62 | P03347 | 387 | NFRNQKMKVC   |
| 63 | P03347 | 409 | NCRAPRKKGCW  |
| 64 | P68431 | 3   | MMMARTKQTA   |
| 65 | P68431 | 18  | GGKAPRKQLAT  |
| 66 | P62805 | 4   | MMMSGRGKGGK  |
| 67 | P17096 | 26  | TEKRGRGRPRK  |
| 68 | P17096 | 58  | TPKRPRGRPKG  |
| 69 | P17096 | 60  | KRPRGRPKGSK  |
| 70 | P31942 | 121 | RPIGRRGGYYG  |
| 71 | O60506 | 444 | MPPPTRGRGRG  |
| 72 | O60506 | 510 | GAAPSRGRGAA  |
| 73 | O60506 | 518 | GAAPPGRAGY   |
| 74 | O60506 | 536 | SARGVRGARGG  |
| 75 | O60506 | 539 | GVRGARGGAAQQ |
| 76 | Q07666 | 45  | LPHRSRGGGGG  |
| 77 | Q07666 | 52  | GGGSRGGARA   |
| 78 | Q07666 | 304 | PVPRGRGVGPP  |
| 79 | P08199 | 656 | GGFGRRGGGRG  |
| 80 | P08199 | 660 | GRGGRRGGFGG  |
| 81 | P08199 | 670 | GRGGRRGGGRG  |
| 82 | P08199 | 680 | GGFGRRGRGGF  |
| 83 | P08199 | 682 | FGGRRRGGFGG  |
| 84 | P08199 | 688 | GGFGRRGGFRG  |
| 85 | P08199 | 692 | GRGGFRGGRRGG |
| 86 | P08199 | 695 | GFRGGRRGGGG  |
| 87 | Q28165 | 238 | DESLFRGRQIK  |
| 88 | Q28165 | 259 | ISTTDRGFPRA  |
| 89 | Q28165 | 263 | DRGFPRARYRA  |
| 90 | Q28165 | 265 | GFPRARYRART  |
| 91 | Q28165 | 267 | PRARYRARTTN  |
| 92 | Q28165 | 269 | ARYRARTTNYN  |
| 93 | Q28165 | 277 | NYNSSRSRFYS  |
| 94 | Q28165 | 279 | NSSRSRFYSGF  |

|     |        |     |                       |
|-----|--------|-----|-----------------------|
| 95  | Q28165 | 287 | SGFN <b>S</b> RPRGRV  |
| 96  | Q28165 | 289 | FNSR <b>P</b> RGRVYR  |
| 97  | Q28165 | 291 | SR <b>P</b> RGRVYRGR  |
| 98  | Q28165 | 294 | RGRV <b>R</b> GRARA   |
| 99  | Q28165 | 296 | RVYR <b>G</b> ARATS   |
| 100 | Q28165 | 298 | YRGR <b>A</b> RATSWY  |
| 101 | O75925 | 303 | RAKGI <b>R</b> NPDHS  |
| 102 | Q96PU8 | 242 | PPAAL <b>R</b> TPTPA  |
| 103 | Q92804 | 206 | SSGD <b>R</b> GGFKN   |
| 104 | Q92804 | 528 | GGDR <b>S</b> RGGYGG  |
| 105 | Q92804 | 535 | GYGD <b>R</b> GGGSG   |
| 106 | Q92804 | 570 | GYGD <b>R</b> GGYGG   |
| 107 | P09867 | 194 | ASS <b>S</b> QRGRSGS  |
| 108 | O00267 | 681 | SAGG <b>Q</b> RGGFGS  |
| 109 | O00267 | 696 | SGG <b>M</b> SRRGRRR  |
| 110 | O00267 | 698 | GMSR <b>G</b> RGRDN   |
| 111 | P69697 | 52  | YGR <b>K</b> KRRQRRR  |
| 112 | P69697 | 53  | GR <b>K</b> KRRQRRR   |
| 113 | Q15554 | 17  | GRAAG <b>R</b> RASRS  |
| 114 | Q9NR22 | 58  | PSC <b>P</b> GRGKMSK  |
| 115 | P15056 | 671 | IFMV <b>G</b> RGYLSP  |
| 116 | Q5TAQ9 | 204 | LHFN <b>Q</b> RGTWLA  |
| 117 | Q96EY1 | 58  | TSCG <b>P</b> RALLTL  |
| 118 | Q96EY1 | 238 | MDTCE <b>R</b> CNGKG  |
| 119 | Q96EY1 | 293 | PCV <b>V</b> CRGAGQA  |
| 120 | P06746 | 83  | ATG <b>K</b> LRRKLEKI |
| 121 | P06746 | 152 | EKR <b>I</b> PREEMLQ  |
| 122 | Q92997 | 27  | PLPA <b>E</b> RVTLAD  |
| 123 | Q92997 | 212 | QSS <b>A</b> SRLMRRH  |
| 124 | Q92997 | 342 | WDP <b>S</b> PRGCFTL  |
| 125 | Q92997 | 698 | ELT <b>A</b> SRRQSF   |
| 126 | Q60487 | 4   | VVV <b>G</b> RRGRGRG  |
| 127 | Q60487 | 6   | VGG <b>R</b> GRGRGTA  |
| 128 | Q60487 | 8   | GRGR <b>G</b> RTAAA   |
| 129 | Q54G21 | 314 | ANLL <b>Q</b> RVAKLG  |
| 130 | Q9R1E0 | 248 | SGK <b>S</b> PRRAAS   |
| 131 | Q9R1E0 | 250 | KSP <b>R</b> RAASMD   |
| 132 | Q13283 | 435 | GPG <b>P</b> RRGGLGG  |
| 133 | P31943 | 233 | FER <b>M</b> RRGAYGG  |
| 134 | P31942 | 287 | MGG <b>Y</b> RRDGMDN  |
| 135 | O60506 | 496 | FQV <b>G</b> ARRGRGR  |
| 136 | P04264 | 82  | SIS <b>V</b> ARRGGGRG |
| 137 | P08729 | 20  | AAF <b>S</b> RRGAQVR  |
| 138 | Q07666 | 310 | GVG <b>P</b> RRGALVR  |
| 139 | Q07666 | 315 | RGAL <b>V</b> RRGTPVR |
| 140 | Q07666 | 320 | RGTP <b>V</b> RRGAI   |
| 141 | Q07666 | 325 | RGAI <b>T</b> RRGATVT |
| 142 | Q07666 | 340 | PPPT <b>V</b> RRGAPAP |
| 143 | Q36736 | 45  | LSPE <b>M</b> RRHYEK  |
| 144 | P02687 | 106 | SQ <b>G</b> KRRGLSLS  |
| 145 | P15720 | 106 | MQA <b>K</b> RRGLSLT  |
| 146 | P25274 | 105 | SQ <b>G</b> KRRGTVLS  |

|     |        |     |              |
|-----|--------|-----|--------------|
| 147 | Q8IZS5 | 113 | ATEVSREDDDR  |
| 148 | P11940 | 493 | QTMGPRPAAAA  |
| 149 | Q9JMB7 | 14  | ARGRARGQETV  |
| 150 | Q9JMB7 | 49  | GDLVGRGRQRG  |
| 151 | Q9JMB7 | 371 | QPKRRRGPGGT  |
| 152 | Q8CDG1 | 74  | LVSMFRGMGLD  |
| 153 | Q8CDG1 | 95  | VPPLGRGVLGR  |
| 154 | Q86WR7 | 252 | QPKAPRFPSNI  |
| 155 | Q86WR7 | 320 | RVARGRGLPGP  |
| 156 | P09651 | 206 | NFGGGRGGGFG  |
| 157 | P09651 | 225 | GNFSGRGGFGG  |
| 158 | P22626 | 203 | SSRSGRGGNFG  |
| 159 | P22626 | 213 | GFGDSRGGGGN  |
| 160 | P51991 | 52  | TDDSLREHF EK |
| 161 | Q99729 | 245 | YGSGRGNRNR   |
| 162 | P14678 | 147 | MTPQGRGTVAA  |
| 163 | Q14524 | 513 | HLSLTRGLSRT  |
| 164 | Q14524 | 526 | KPRSSRGSIFT  |
| 165 | Q14524 | 680 | ELEESRHKCPP  |
| 166 | P23246 | 681 | GGQPRGMGPG   |
| 167 | P68363 | 339 | TIKTKRSIQFV  |
| 168 | P07437 | 318 | VAAVFRGRMSM  |
| 169 | Q15554 | 18  | RAAGRASRSS   |
| 170 | Q86V81 | 220 | TRRGTGGARG   |
| 171 | O08583 | 218 | TRRGTGGSRG   |
| 172 | P39748 | 19  | APSAIRENDIK  |
| 173 | P39748 | 100 | GELAKRSERRA  |
| 174 | P39748 | 104 | KRSERRAEAEK  |
| 175 | P39748 | 192 | SPVLMRHILTAS |
| 176 | P68433 | 9   | TKQTARKSTGG  |
| 177 | P31269 | 140 | EPLSARRGDCP  |
| 178 | Q8CDG1 | 100 | RGVLGRGLSAN  |
| 179 | Q8CDG1 | 163 | ASSIGRGMDKP  |
| 180 | Q8CDG1 | 549 | SNELTRWGLSL  |
| 181 | P04049 | 563 | IFMVG RGYASP |
| 182 | P46783 | 158 | RGGFGRGRGQP  |
| 183 | P46783 | 160 | GFGRRGRGPPQ  |
| 184 | O76922 | 13  | VIARGRGRGRK  |
| 185 | O76922 | 15  | ARGRRGRKPN   |

**(B) List of 1,296 negative Arg-methylation sites and sequence**

| Sequence # | Protein ID | Site | Sequences    |
|------------|------------|------|--------------|
| 1          | Q9NR22     | 229  | VAIEDRQYKDF  |
| 2          | Q9UBL3     | 324  | LFSARQLPPHG  |
| 3          | Q92934     | 72   | VEIRS RHSSYP |
| 4          | Q7Q2B7     | 222  | IDLPERVDVII  |
| 5          | P11911     | 9    | GLEALRALPLL  |
| 6          | P11911     | 118  | CGTYLVRNPV   |

|    |        |      |              |
|----|--------|------|--------------|
| 7  | Q09472 | 86   | LSELLRSGSSP  |
| 8  | Q09472 | 354  | HKCQRREQANG  |
| 9  | Q09472 | 408  | WKNCTRHDPCV  |
| 10 | Q09472 | 580  | ITQDLRNHLVH  |
| 11 | Q09472 | 604  | ALKDRRMENLV  |
| 12 | Q09472 | 649  | LEEKRRTLQK   |
| 13 | Q09472 | 1015 | TETEERSTELK  |
| 14 | Q09472 | 1076 | ESLPFRQPVDP  |
| 15 | Q09472 | 1324 | GEVTVRVVHAS  |
| 16 | Q09472 | 1410 | RPKCLRTAVYH  |
| 17 | Q09472 | 1462 | IPKPKRLQEWY  |
| 18 | P03372 | 28   | LEPLNRPOLKI  |
| 19 | P03372 | 158  | NSDNRREQGRE  |
| 20 | P03372 | 234  | IDKNRRKSCQA  |
| 21 | P03372 | 256  | MKGGIRKDRRG  |
| 22 | P03372 | 503  | QQQHQLAQLL   |
| 23 | P03372 | 515  | ILSHIRHMSNK  |
| 24 | Q01844 | 614  | GFGGRRGGPG   |
| 25 | Q01844 | 632  | EOMGRRGGRG   |
| 26 | P22509 | 76   | GGGRGGGGRG   |
| 27 | P22509 | 224  | VIEDARHPHKY  |
| 28 | P35637 | 213  | YGQDRGGGRGR  |
| 29 | P35637 | 269  | KFGGPRDQGSR  |
| 30 | P35637 | 274  | RDQGRHDSEQ   |
| 31 | P35637 | 328  | NLYTDRETGKL  |
| 32 | P03347 | 299  | RDYVDRFYKTL  |
| 33 | P03347 | 305  | FYKTLRAEQAS  |
| 34 | P03347 | 429  | KDCTERQANFL  |
| 35 | P03347 | 452  | NFLQSRPEPTA  |
| 36 | P03347 | 502  | PLTSLRSLFGN  |
| 37 | P68431 | 54   | LREIRRYQKST  |
| 38 | P68431 | 73   | FQRLVREIAQD  |
| 39 | P68431 | 117  | AIHAKRVTIMP  |
| 40 | P68431 | 130  | IQLARIRGER   |
| 41 | P62805 | 24   | HRKVLRDNIQG  |
| 42 | P62805 | 68   | LENVIRDAVTY  |
| 43 | P62805 | 96   | LKRQGRRTLYGF |
| 44 | P17096 | 84   | PGRKPRGRPKK  |
| 45 | P31942 | 19   | SDGTVRLRGLP  |
| 46 | P31942 | 21   | GTVRLRGLPFG  |
| 47 | P31942 | 105  | YDPPRLLGQR   |
| 48 | P31942 | 222  | PLNPIRVHIDI  |
| 49 | O60506 | 303  | TAAQARRRLMS  |
| 50 | O60506 | 305  | AQARRRLMSGK  |
| 51 | O60506 | 446  | PPTRGRGRGGR  |
| 52 | Q07666 | 13   | AARMSRSSGRS  |
| 53 | Q07666 | 43   | PPLPHRSRGGG  |
| 54 | Q07666 | 291  | VPVRRGAAPP   |
| 55 | Q07666 | 331  | GATVTRGVPPP  |
| 56 | P08199 | 394  | KVRAARTLLAK  |
| 57 | P08199 | 604  | RIVTDRETGSS  |
| 58 | O75925 | 63   | KELYRRRFPQK  |

|     |        |     |              |
|-----|--------|-----|--------------|
| 59  | O75925 | 257 | ITSLVRLSTTV  |
| 60  | O75925 | 579 | LLHSSRFFPYT  |
| 61  | Q92804 | 101 | GSQGGRAPSYD  |
| 62  | Q92804 | 164 | HTQDDRDRVSR  |
| 63  | Q92804 | 165 | TQDDRDRVSR   |
| 64  | Q92804 | 185 | SQGGGRGGY    |
| 65  | Q92804 | 321 | SFATRPEFMR   |
| 66  | Q92804 | 372 | NMNFARRNSCN  |
| 67  | Q92804 | 415 | GRGGDRGGYGG  |
| 68  | Q92804 | 431 | GYGGDRSSGGG  |
| 69  | Q92804 | 459 | GYGGDRGGYGG  |
| 70  | Q92804 | 580 | GKMGGRNDYRN  |
| 71  | Q92804 | 584 | GRNDYRNDQRN  |
| 72  | P09867 | 82  | HKVDGRVVEPK  |
| 73  | P09867 | 88  | VVEPKRAVSRE  |
| 74  | O00267 | 17  | EEDSERSSDGE  |
| 75  | O00267 | 30  | EVDEERRSAAG  |
| 76  | O00267 | 130 | LQNLWRDQREE  |
| 77  | O00267 | 368 | GNRYSRKGFLF  |
| 78  | O00267 | 571 | KVVTVRHQAVT  |
| 79  | O00267 | 641 | FVCKTRHLVLA  |
| 80  | O00267 | 652 | GGSKPRDVTNF  |
| 81  | O00267 | 783 | YGSGRTPMYG   |
| 82  | P69697 | 7   | EPVDPRLPEWK  |
| 83  | P69697 | 56  | KRRQRRRPPQG  |
| 84  | Q15554 | 28  | SGRARRRRHEP  |
| 85  | Q15554 | 30  | RARRGRHEPGL  |
| 86  | Q15554 | 47  | GAGEARLEEAV  |
| 87  | Q15554 | 69  | ALRAFRRGSRYG |
| 88  | Q15554 | 72  | AFRRGRYGDFR  |
| 89  | Q15554 | 192 | TTQKLRNDLLN  |
| 90  | Q15554 | 356 | QPKNKRMTISR  |
| 91  | P15056 | 188 | KALMMRGLIPE  |
| 92  | P15056 | 260 | LFQGFRCQTCG  |
| 93  | P15056 | 347 | IPQPFRRPADED |
| 94  | P15056 | 360 | NQFGQRDRSSS  |
| 95  | P15056 | 426 | GPQREKRKSSSS |
| 96  | Q5TAQ9 | 161 | PALRERELGSS  |
| 97  | Q96EY1 | 187 | PEELFRKIFGE  |
| 98  | Q96EY1 | 272 | GPFVMRSTCRR  |
| 99  | Q96EY1 | 276 | MRSTCRRCGGR  |
| 100 | Q96EY1 | 281 | RRCGGRGSI II |
| 101 | Q96EY1 | 303 | AKQKKRVMIPV  |
| 102 | Q96EY1 | 364 | LGGTARAQGLY  |
| 103 | P06746 | 89  | KLEKIRQDDTS  |
| 104 | P06746 | 126 | TLEDLRKNEDK  |
| 105 | Q92997 | 215 | ASRLMRRHKRR  |
| 106 | Q92997 | 220 | RRHKRRRRKQK  |
| 107 | Q54G21 | 660 | KMMESRNEAIT  |
| 108 | Q54G21 | 708 | INQLKRDYNTL  |
| 109 | Q54G21 | 827 | TLETESALSS   |
| 110 | Q54G21 | 841 | LVENTRLETES  |

|     |        |     |              |
|-----|--------|-----|--------------|
| 111 | Q9R1E0 | 19  | FEPLRQRSC    |
| 112 | Q9R1E0 | 313 | STFRPRTSSNA  |
| 113 | Q9R1E0 | 551 | TSAMNRLTPVK  |
| 114 | Q9R1E0 | 586 | CNGYGRMGVLH  |
| 115 | Q13283 | 106 | NNQALRRFMQT  |
| 116 | Q13283 | 107 | NQALRRFMQTF  |
| 117 | Q13283 | 283 | PASQRPESKP   |
| 118 | P31943 | 230 | GAGFERMRRGA  |
| 119 | P04264 | 30  | INYQRRTTSSS  |
| 120 | P04264 | 65  | GGFGSRSLVNL  |
| 121 | P04264 | 199 | FIDKVRFLQQ   |
| 122 | P04264 | 343 | SMDNNRSLDL   |
| 123 | P08729 | 48  | GASRPVAVRS   |
| 124 | P08729 | 305 | DLRNRNEISE   |
| 125 | P15720 | 10  | KRSSFRHGSKM  |
| 126 | P15720 | 48  | FFGGDRHVPRR  |
| 127 | P15720 | 96  | NIVSPRTPPPM  |
| 128 | P15720 | 162 | GGSGSRPGSRS  |
| 129 | P25274 | 128 | FGYGGRAADYK  |
| 130 | Q8IZS5 | 61  | EKKVIRHDMPD  |
| 131 | Q8IZS5 | 67  | HDMPDRTLAAH  |
| 132 | Q8IZS5 | 77  | HQQKFRLPASA  |
| 133 | P11940 | 153 | QEAAERAIEKM  |
| 134 | P11940 | 166 | MLLNRKVFVG   |
| 135 | P11940 | 186 | AELGARAKEFT  |
| 136 | P11940 | 287 | QMKQDRITRYQ  |
| 137 | P11940 | 331 | MMEGGRSKGFG  |
| 138 | Q9JMB7 | 6   | MTGRARARARG  |
| 139 | Q9JMB7 | 36  | GYIPPRPQQSP  |
| 140 | Q9JMB7 | 51  | LVGRGRQGMV   |
| 141 | Q9JMB7 | 84  | ERGRRRDFHD   |
| 142 | Q9JMB7 | 147 | EARRLSALLF   |
| 143 | Q8CDG1 | 177 | FGLTARDPPRL  |
| 144 | Q86WR7 | 140 | AGKEHRKQDAE  |
| 145 | Q86WR7 | 204 | QKISERMAGNE  |
| 146 | Q86WR7 | 221 | PFREGRPGEWR  |
| 147 | P09651 | 265 | YSGGSRGYGSG  |
| 148 | P22626 | 185 | HNAEVRKALSR  |
| 149 | P51991 | 239 | GGNFGRGGNFG  |
| 150 | Q99729 | 30  | EASRGRGWTGA  |
| 151 | P14678 | 228 | PPPGMRGPPPP  |
| 152 | Q14524 | 179 | VKILARGFCLH  |
| 153 | Q14524 | 340 | CPEGYRCLKAG  |
| 154 | Q14524 | 367 | FLALFRMLTQD  |
| 155 | P23246 | 399 | FGPIERAVVIV  |
| 156 | P68363 | 105 | ANNYARGHYTI  |
| 157 | P68363 | 264 | LVPYPRIHFP   |
| 158 | P68363 | 320 | CCLLYRGDVVP  |
| 159 | P07437 | 77  | TMDSVRSGPFG  |
| 160 | P07437 | 162 | EEYPDRIIMNTF |
| 161 | P07437 | 282 | GSQQYRALVTP  |
| 162 | P07437 | 359 | CDIPPRGLKMA  |

|     |        |      |              |
|-----|--------|------|--------------|
| 163 | Q86V81 | 20   | LNRSQRGGRRGG |
| 164 | Q86V81 | 174  | VPLDGRPMNIQ  |
| 165 | Q86V81 | 197  | AQSVNRGGMTR  |
| 166 | Q86V81 | 202  | RGGMTNRNGAG  |
| 167 | O08583 | 56   | GGGPMNRPAI   |
| 168 | O08583 | 203  | GMTRNRGSGGF  |
| 169 | P39748 | 70   | MGMFYRTIRMM  |
| 170 | P31269 | 207  | HARSTRKKRCP  |
| 171 | P31269 | 233  | NMYLTRDRRYE  |
| 172 | P31269 | 241  | RYEVARLLNLT  |
| 173 | P04049 | 100  | CCAVFRLLHEH  |
| 174 | P04049 | 143  | THNFARKTFLK  |
| 175 | P04049 | 231  | VSSQHRYSTPH  |
| 176 | P04049 | 282  | IEDAIRSHSES  |
| 177 | P04049 | 318  | PAQRERAPVSG  |
| 178 | P04049 | 333  | NKIRPRGQRDS  |
| 179 | P46783 | 8    | MPKKNRIAIYE  |
| 180 | P46783 | 80   | GIQYLRDYLHL  |
| 181 | P46783 | 96   | PATLRRSRPET  |
| 182 | P46783 | 105  | ETGRPRPKGLE  |
| 183 | P46783 | 116  | GERPARLTRGE  |
| 184 | P46783 | 128  | DRDTYRRSAVP  |
| 185 | O76922 | 87   | SVRGRRLITDL  |
| 186 | Q9NR22 | 13   | RCLLLRRKMAE  |
| 187 | Q9NR22 | 14   | CLLLRRKMAEN  |
| 188 | Q9UBL3 | 211  | ECMTTRQRP GK |
| 189 | Q9UBL3 | 231  | TMSKERDVFLV  |
| 190 | Q9UBL3 | 315  | TTKKARSDPLF  |
| 191 | Q9UBL3 | 374  | PGDLYRACLYE  |
| 192 | Q9UBL3 | 411  | GYSMVRASHGV  |
| 193 | Q9UBL3 | 592  | KDLTYRPMSDM  |
| 194 | Q92934 | 116  | GRELRRMSDEF  |
| 195 | Q92934 | 131  | KKGLPRPKSAG  |
| 196 | Q7Q2B7 | 84   | ELVLFRFASRG  |
| 197 | Q7Q2B7 | 88   | FRFASRGDCQQ  |
| 198 | Q7Q2B7 | 95   | DCQQFRSLLHK  |
| 199 | Q7Q2B7 | 341  | EKDLHRIQIDV  |
| 200 | Q7Q2B7 | 447  | KNPYFRYTGAP  |
| 201 | P11911 | 47   | LGEEARLTCEN  |
| 202 | P11911 | 96   | VNKNHRGLYWC  |
| 203 | P11911 | 137  | EGTKNRIITAE  |
| 204 | Q09472 | 1104 | LSTIKRKLDTG  |
| 205 | Q09472 | 1133 | AWLYNRKTSRV  |
| 206 | Q09472 | 1197 | YSYQNRHYHFC  |
| 207 | Q09472 | 1392 | PPNQRRVYISY  |
| 208 | Q09472 | 1494 | QATEDRLTSAK  |
| 209 | P03372 | 37   | KIPLERPLGEV  |
| 210 | P03372 | 142  | SGYTVREAGPP  |
| 211 | P03372 | 241  | SCQACRLRKC   |
| 212 | P03372 | 436  | TSSRFRRMMNLQ |
| 213 | Q01844 | 392  | VKMNKRTGQPM  |
| 214 | P22509 | 56   | GGGGFRGRGGG  |



|     |        |      |                               |
|-----|--------|------|-------------------------------|
| 215 | P22509 | 84   | GRGGK <b>R</b> GNQSG          |
| 216 | P35637 | 521  | EHRQD <b>R</b> RRERPY         |
| 217 | P03347 | 275  | LNKIV <b>R</b> MYSP           |
| 218 | P03347 | 403  | EGHT <b>A</b> RNCRAP          |
| 219 | P68431 | 129  | DIQL <b>A</b> RRIRGE          |
| 220 | P62805 | 40   | IRRL <b>A</b> RRGGVK          |
| 221 | P62805 | 79   | TEHAK <b>R</b> KTVTA          |
| 222 | P31942 | 93   | IFR <b>S</b> SRSEIKG          |
| 223 | P31942 | 129  | YYGAG <b>R</b> GSMYD          |
| 224 | P31942 | 261  | NNM <b>Q</b> HRYIELF          |
| 225 | P31942 | 301  | YGSV <b>G</b> RMGMN           |
| 226 | P31942 | 323  | LGGY <b>G</b> RGGGGS          |
| 227 | O60506 | 103  | VMKTY <b>R</b> QREKQ          |
| 228 | O60506 | 229  | NNHEI <b>R</b> SGKHI          |
| 229 | O60506 | 451  | RGR <b>G</b> GGGYGY           |
| 230 | O60506 | 504  | GGR <b>G</b> ARGAAPS          |
| 231 | O60506 | 557  | GARG <b>G</b> RGGNVG          |
| 232 | O60506 | 565  | NVGK <b>R</b> KADGY           |
| 233 | Q07666 | 10   | DDPA <b>A</b> RRSRSS          |
| 234 | Q07666 | 204  | GKG <b>S</b> MRDKAKE          |
| 235 | Q07666 | 436  | VKGAY <b>R</b> EHPYG          |
| 236 | P08199 | 343  | AVVD <b>V</b> RTGTNR          |
| 237 | P08199 | 421  | DALEI <b>R</b> LVSQD          |
| 238 | P08199 | 474  | G <b>Q</b> R <b>Q</b> ERTGKNS |
| 239 | Q28165 | 17   | GAAG <b>G</b> RGSGPG          |
| 240 | Q28165 | 25   | GP <b>G</b> RRRHLVPG          |
| 241 | Q28165 | 78   | EP <b>P</b> RRAPPGA           |
| 242 | Q28165 | 200  | CGSV <b>N</b> RVTILC          |
| 243 | Q28165 | 248  | KVIP <b>K</b> RTNRPG          |
| 244 | O75925 | 276  | TAEI <b>G</b> RNY SMA         |
| 245 | O75925 | 528  | LIQDY <b>R</b> HPPFHM         |
| 246 | Q96PU8 | 106  | RIL <b>G</b> PRGLTAK          |
| 247 | Q92804 | 221  | RDYGP <b>R</b> TDADS          |
| 248 | Q92804 | 320  | V <b>S</b> FATRRPEFM          |
| 249 | Q92804 | 341  | GR <b>G</b> GYRGRGGF          |
| 250 | Q92804 | 349  | GG <b>F</b> QGRGGDPK          |
| 251 | Q92804 | 388  | RPED <b>S</b> RPSGGD          |
| 252 | Q92804 | 406  | GERGY <b>R</b> GRGGR          |
| 253 | Q92804 | 422  | GY <b>G</b> GD <b>R</b> SGGGY |
| 254 | P09867 | 31   | TDE <b>S</b> LRSHFEQ          |
| 255 | P09867 | 196  | SS <b>Q</b> RGRSGSGN          |
| 256 | P09867 | 300  | Y <b>F</b> AKPRNQGGY          |
| 257 | O00267 | 31   | VDE <b>E</b> RRSAAGS          |
| 258 | O00267 | 65   | EED <b>D</b> DRPPKKP          |
| 259 | O00267 | 319  | DR <b>I</b> KARMSLKD          |
| 260 | O00267 | 346  | DAEK <b>I</b> RSLGGD          |
| 261 | O00267 | 516  | LKV <b>L</b> PRDLQLC          |
| 262 | O00267 | 582  | RKKD <b>N</b> RFAVAL          |
| 263 | O00267 | 711  | IG <b>Q</b> TVRISQGP          |
| 264 | O00267 | 798  | LQD <b>G</b> SRTPHYG          |
| 265 | O00267 | 831  | P <b>N</b> T <b>P</b> SRAEEY  |
| 266 | O00267 | 1049 | IL <b>G</b> ED <b>R</b> EATGV |

|     |        |      |              |
|-----|--------|------|--------------|
| 267 | O00267 | 1066 | EDGIVRMDLDE  |
| 268 | P69697 | 78   | PTSQSRGDPTG  |
| 269 | Q15554 | 13   | SDGSGRAAGR   |
| 270 | Q15554 | 77   | RYGDFRQIRDI  |
| 271 | Q15554 | 102  | VSRLLRVMQCL  |
| 272 | P15056 | 239  | THNFVRKTFFT  |
| 273 | Q5TAQ9 | 11   | SSTDGRTDLAN  |
| 274 | Q5TAQ9 | 151  | ALPRPRWQALP  |
| 275 | Q5TAQ9 | 177  | EACGARVVFVQR |
| 276 | Q5TAQ9 | 182  | RVFVQRFRLQH  |
| 277 | Q96EY1 | 102  | ILGVPRNASQK  |
| 278 | Q96EY1 | 332  | IFITFRVQKSP  |
| 279 | P06746 | 102  | INFLTRVSGIG  |
| 280 | P06746 | 137  | LNHHQRIGLKY  |
| 281 | P06746 | 258  | RRIDIRLIPKD  |
| 282 | Q92997 | 145  | SAQREPRRRD   |
| 283 | Q92997 | 167  | AKGERRREPGG  |
| 284 | Q60487 | 105  | MKEDGRLLASK  |
| 285 | Q54G21 | 180  | VANGDRVSIKY  |
| 286 | Q54G21 | 230  | GVIGMRKSAKR  |
| 287 | Q54G21 | 793  | EESLKRLLKLD  |
| 288 | Q54G21 | 1425 | IDNSPRQTTTE  |
| 289 | Q9R1E0 | 249  | GKSPRRAASM   |
| 290 | Q9R1E0 | 487  | AQPNSRVLGQN  |
| 291 | Q9R1E0 | 534  | ASVNGRTLPHV  |
| 292 | Q13283 | 159  | EEPEERQQTPE  |
| 293 | Q13283 | 296  | QIPPQRQRDQ   |
| 294 | P31943 | 16   | FVVKVRGLPWS  |
| 295 | P31943 | 52   | YTREGRPSGEA  |
| 296 | P31943 | 192  | SRAEVRTHYDP  |
| 297 | P31943 | 217  | RPGAGRGYNSI  |
| 298 | P04264 | 37   | TSSSTRRSGGG  |
| 299 | P04264 | 386  | QITAGRHHGDSV |
| 300 | P08729 | 30   | RLSSARPGGLG  |
| 301 | P08729 | 46   | GLGASRPRVAV  |
| 302 | P08729 | 52   | PRVAVRSAYGG  |
| 303 | P08729 | 64   | VGAGIREVTIN  |
| 304 | P08729 | 187  | DEINHRTAAEN  |
| 305 | P08729 | 276  | MAKCSRAEAEA  |
| 306 | P08729 | 313  | ISEMNRAIQRL  |
| 307 | P08729 | 317  | NRAIQRLQAEI  |
| 308 | Q36736 | 14   | SAKLDRLDQEF  |
| 309 | P02687 | 41   | LDSLGRFFGSD  |
| 310 | P15720 | 78   | RSQHGRPGDDN  |
| 311 | P15720 | 166  | SRPGSRSGSPV  |
| 312 | P25274 | 9    | KRPSQRHGSKY  |
| 313 | P25274 | 49   | FFSSDRGAPKR  |
| 314 | Q8IZS5 | 31   | MVKEDREATEG  |
| 315 | Q8IZS5 | 142  | QDESGREETLN  |
| 316 | Q8IZS5 | 177  | LEEFQRSQKTI  |
| 317 | P11940 | 89   | IMWSQRDPSLR  |
| 318 | P11940 | 206  | DMDDERLKDLF  |

|     |        |     |              |
|-----|--------|-----|--------------|
| 319 | P11940 | 278 | QTELRKRFEQM  |
| 320 | P11940 | 311 | DDERLRKEFSP  |
| 321 | Q9JMB7 | 83  | AERGGRRRDFH  |
| 322 | Q9JMB7 | 145 | LMEARLRSAL   |
| 323 | Q9JMB7 | 160 | EDLIGRCHAFD  |
| 324 | Q8CDG1 | 9   | VRPLFRGPTPV  |
| 325 | Q8CDG1 | 88  | RPPSKREVPPPL |
| 326 | Q8CDG1 | 111 | MVRKDREEPSR  |
| 327 | Q8CDG1 | 156 | LLPLGRAASSI  |
| 328 | Q86WR7 | 6   | MPVTHRKSAS   |
| 329 | Q86WR7 | 22  | TSPSCRRLRAFS |
| 330 | Q86WR7 | 173 | PDPPrELRAP   |
| 331 | Q86WR7 | 176 | PRRELAPSP    |
| 332 | Q86WR7 | 265 | TNGAAREPRRT  |
| 333 | P22626 | 15  | LERKKREKEQF  |
| 334 | P22626 | 60  | DPASKRSRGFG  |
| 335 | P22626 | 228 | PGSNFRGGSDG  |
| 336 | P22626 | 238 | GYGSGRGFGDG  |
| 337 | P51991 | 9   | KPPPGRPQD    |
| 338 | P51991 | 113 | KRAVSRSDSVK  |
| 339 | P51991 | 143 | EEYNLRDYFEK  |
| 340 | P51991 | 226 | GNFMGRGGNFG  |
| 341 | Q99729 | 248 | GGRGNRNRGNR  |
| 342 | Q99729 | 250 | RGNRNRGNRGS  |
| 343 | P14678 | 221 | PPPGMRPPPPG  |
| 344 | P23246 | 7   | SRDRFRSRGGG  |
| 345 | P23246 | 18  | GGGFHRRGGG   |
| 346 | P23246 | 25  | GGGGRRGLHD   |
| 347 | P68363 | 215 | YDICRRNLDIE  |
| 348 | P68363 | 243 | ITASLRFDGAL  |
| 349 | P68363 | 308 | VKCDPRHGKYM  |
| 350 | P07437 | 213 | YDICFRTLKLT  |
| 351 | P07437 | 241 | VTTCLRFPGQL  |
| 352 | P07437 | 276 | APLTSRGSQOY  |
| 353 | P07437 | 306 | AACDPRHGRYL  |
| 354 | P07437 | 380 | QELFKRISEQF  |
| 355 | Q86V81 | 63  | RPAIARGAAGG  |
| 356 | Q86V81 | 79  | PAPYSRPKQLP  |
| 357 | Q86V81 | 144 | YDRSGRSLGTA  |
| 358 | O08583 | 189 | IDTQRPAQSI   |
| 359 | P39748 | 211 | EFHLSRILQEL  |
| 360 | P39748 | 239 | YCESIRGIGPK  |
| 361 | P39748 | 332 | RLSKSRQGSTQ  |
| 362 | P39748 | 355 | LSSAKRKEPEP  |
| 363 | P31269 | 128 | GLPSSRPYGIK  |
| 364 | P31269 | 141 | PLSARRGDCPT  |
| 365 | P04049 | 59  | TSNTIRVFLPN  |
| 366 | P04049 | 223 | RESVSRMPVSS  |
| 367 | P46783 | 55  | QSLKSRGYVKE  |
| 368 | O76922 | 86  | GsvrGRRLITD  |
| 369 | O76922 | 123 | FKVLKRPNWTI  |
| 370 | O76922 | 146 | ATRLRRSFLYE  |

|     |        |      |                                                          |
|-----|--------|------|----------------------------------------------------------|
| 371 | Q9NR22 | 368  | NAKNV <b>R</b> DLDF <b>T</b>                             |
| 372 | Q9UBL3 | 181  | LTWQ <b>S</b> R <b>T</b> QDEH                            |
| 373 | Q9UBL3 | 380  | ACLY <b>E</b> R <b>V</b> LLAL                            |
| 374 | Q9UBL3 | 417  | ASHG <b>V</b> R <b>K</b> GAWY                            |
| 375 | Q9UBL3 | 437  | PD <b>T</b> A <b>A</b> R <b>L</b> GWSQ                   |
| 376 | Q9UBL3 | 622  | EVDG <b>R</b> R <b>S</b> PPWE                            |
| 377 | Q92934 | 112  | AQ <b>R</b> Y <b>G</b> RELRRM                            |
| 378 | Q92934 | 142  | TATQ <b>M</b> R <b>Q</b> SSSW                            |
| 379 | Q92934 | 149  | SS <b>S</b> W <b>T</b> R <b>V</b> FQSW                   |
| 380 | Q92934 | 157  | Q <b>S</b> W <b>W</b> D <b>R</b> N <b>L</b> GRG          |
| 381 | Q7Q2B7 | 40   | Q <b>G</b> M <b>A</b> V <b>R</b> LLQEG                   |
| 382 | Q7Q2B7 | 67   | T <b>T</b> H <b>L</b> S <b>R</b> GH <b>T</b> SH          |
| 383 | Q7Q2B7 | 299  | N <b>L</b> V <b>A</b> L <b>R</b> DAAMK                   |
| 384 | P11911 | 162  | L <b>L</b> F <b>R</b> K <b>R</b> WQNEK                   |
| 385 | Q09472 | 15   | P <b>P</b> SA <b>K</b> R <b>P</b> KLSS                   |
| 386 | Q09472 | 370  | N <b>L</b> PH <b>C</b> R <b>T</b> MKNV                   |
| 387 | Q09472 | 504  | SP <b>Q</b> G <b>M</b> R <b>P</b> MSNM                   |
| 388 | Q09472 | 626  | ES <b>A</b> NN <b>R</b> AEYYH                            |
| 389 | Q09472 | 1187 | L <b>C</b> T <b>I</b> P <b>R</b> DATYY                   |
| 390 | Q09472 | 1297 | R <b>L</b> P <b>S</b> T <b>R</b> L <b>G</b> TFL          |
| 391 | Q09472 | 1342 | P <b>G</b> M <b>K</b> A <b>R</b> F <b>V</b> DSG          |
| 392 | P03372 | 183  | SA <b>K</b> E <b>T</b> R <b>Y</b> CAVC                   |
| 393 | P03372 | 269  | M <b>L</b> K <b>H</b> K <b>R</b> Q <b>R</b> DDG          |
| 394 | Q01844 | 486  | G <b>G</b> P <b>M</b> G <b>R</b> M <b>G</b> GRG          |
| 395 | P22509 | 38   | G <b>F</b> G <b>G</b> G <b>R</b> G <b>G</b> F <b>G</b> G |
| 396 | P22509 | 58   | G <b>G</b> F <b>R</b> G <b>R</b> G <b>G</b> G <b>G</b> G |
| 397 | P22509 | 74   | Q <b>S</b> G <b>G</b> G <b>R</b> G <b>R</b> G <b>G</b> G |
| 398 | P22509 | 106  | G <b>V</b> F <b>I</b> C <b>R</b> G <b>K</b> EDA          |
| 399 | P35637 | 216  | Q <b>D</b> R <b>G</b> G <b>R</b> G <b>R</b> G <b>S</b>   |
| 400 | P35637 | 234  | G <b>G</b> G <b>Y</b> N <b>R</b> S <b>S</b> G <b>G</b> Y |
| 401 | P35637 | 372  | S <b>F</b> A <b>T</b> R <b>R</b> A <b>D</b> F <b>N</b> R |
| 402 | P35637 | 518  | S <b>R</b> G <b>E</b> H <b>R</b> Q <b>D</b> R <b>R</b> E |
| 403 | P03347 | 20   | R <b>W</b> E <b>K</b> I <b>R</b> L <b>R</b> P <b>G</b> G |
| 404 | P03347 | 22   | E <b>K</b> I <b>R</b> L <b>R</b> P <b>G</b> G <b>K</b>   |
| 405 | P68431 | 41   | V <b>K</b> K <b>P</b> H <b>R</b> Y <b>R</b> P <b>G</b> T |
| 406 | P68431 | 43   | K <b>P</b> H <b>R</b> Y <b>R</b> P <b>G</b> T <b>V</b> A |
| 407 | P68431 | 50   | G <b>T</b> V <b>A</b> L <b>R</b> E <b>I</b> R <b>R</b> Y |
| 408 | P68431 | 64   | T <b>E</b> L <b>L</b> I <b>R</b> K <b>L</b> P <b>F</b> Q |
| 409 | P68431 | 84   | F <b>K</b> T <b>D</b> L <b>R</b> F <b>Q</b> SSA          |
| 410 | P62805 | 18   | K <b>G</b> G <b>A</b> K <b>R</b> H <b>R</b> K <b>V</b> L |
| 411 | P62805 | 37   | K <b>P</b> A <b>I</b> R <b>R</b> L <b>A</b> R <b>R</b> G |
| 412 | P62805 | 46   | R <b>G</b> G <b>V</b> K <b>R</b> I <b>S</b> G <b>L</b> I |
| 413 | P17096 | 24   | D <b>G</b> T <b>E</b> K <b>R</b> G <b>R</b> G <b>R</b> P |
| 414 | P17096 | 28   | K <b>R</b> G <b>R</b> G <b>R</b> P <b>R</b> K <b>Q</b> P |
| 415 | P31942 | 174  | R <b>M</b> R <b>D</b> G <b>R</b> G <b>M</b> G <b>G</b> H |
| 416 | P31942 | 205  | R <b>G</b> L <b>P</b> F <b>R</b> A <b>T</b> E <b>N</b> D |
| 417 | O60506 | 381  | I <b>H</b> F <b>D</b> E <b>R</b> D <b>G</b> A <b>V</b> K |
| 418 | O60506 | 526  | A <b>G</b> Y <b>S</b> Q <b>R</b> G <b>G</b> P <b>G</b> S |
| 419 | O60506 | 554  | G <b>V</b> R <b>G</b> A <b>R</b> G <b>G</b> R <b>G</b> G |
| 420 | O60506 | 577  | Q <b>P</b> D <b>S</b> K <b>R</b> R <b>Q</b> T <b>N</b> N |
| 421 | O60506 | 578  | P <b>D</b> S <b>K</b> R <b>R</b> Q <b>T</b> N <b>N</b> Q |
| 422 | Q07666 | 31   | A <b>H</b> P <b>S</b> V <b>R</b> Q <b>T</b> P <b>S</b> R |

|     |        |     |              |
|-----|--------|-----|--------------|
| 423 | Q07666 | 282 | VPEPSRGRGVP  |
| 424 | Q07666 | 284 | EPSRGRGVPVR  |
| 425 | Q07666 | 346 | GAPAPRARTAG  |
| 426 | P08199 | 348 | RTGTNRKFGYV  |
| 427 | P08199 | 554 | EGRTIRLELOQ  |
| 428 | P08199 | 599 | GSVRARIVTDR  |
| 429 | Q28165 | 23  | GSGPGRRRHLV  |
| 430 | O75925 | 248 | PKRPSRPINIT  |
| 431 | O75925 | 347 | LTIPCRALTCS  |
| 432 | O75925 | 417 | TWAPMRSKKEV  |
| 433 | O75925 | 507 | ASPVSRTPSLP  |
| 434 | Q96PU8 | 53  | EISRVRKDMYN  |
| 435 | Q96PU8 | 139 | KEEQNRGKPNW  |
| 436 | Q96PU8 | 205 | LNGTYRDANIK  |
| 437 | Q96PU8 | 256 | IMPLIRQIQTA  |
| 438 | Q96PU8 | 320 | ATKVRRHDMRV  |
| 439 | Q96PU8 | 324 | RRHDMRVHPYQ  |
| 440 | Q92804 | 216 | NFGGHRDYGPR  |
| 441 | Q92804 | 334 | GSGGRRRGRGG  |
| 442 | Q92804 | 335 | SGGRRRGRGGY  |
| 443 | Q92804 | 411 | RGRGRRGGDRG  |
| 444 | P09867 | 122 | EEHHLRDYFEQ  |
| 445 | P09867 | 140 | EIMTDRGSGKK  |
| 446 | P09867 | 284 | GNFGGRSSGPY  |
| 447 | O00267 | 71  | PPKKPRHGGFI  |
| 448 | O00267 | 190 | KIGEERATAIS  |
| 449 | O00267 | 198 | AISLMRKFIAIY |
| 450 | O00267 | 610 | GPHSGREGEIR  |
| 451 | O00267 | 615 | REGEIRHLFRS  |
| 452 | O00267 | 619 | IRHLFRSFAFL  |
| 453 | O00267 | 767 | TSTYGRTPMYG  |
| 454 | O00267 | 989 | IQVKVRDITYLD |
| 455 | P69697 | 49  | GISYGRKKRRQ  |
| 456 | Q15554 | 41  | GGPAERGAGEA  |
| 457 | Q15554 | 274 | PREPARQLRNP  |
| 458 | P15056 | 199 | CCAVYRIQDGE  |
| 459 | P15056 | 362 | FGQRDRSSSAP  |
| 460 | P15056 | 384 | IDDLIRDQGFR  |
| 461 | P15056 | 435 | SSSEDNRMKT   |
| 462 | Q5TAQ9 | 65  | TSTESRGTDTTE |
| 463 | Q5TAQ9 | 94  | INDENRVHDRS  |
| 464 | Q5TAQ9 | 117 | EQPRRRVQRKR  |
| 465 | Q5TAQ9 | 125 | RKRANRDQDSS  |
| 466 | Q5TAQ9 | 134 | SSDDERALEDW  |
| 467 | Q5TAQ9 | 149 | TSALPRPRWQA  |
| 468 | Q5TAQ9 | 159 | ALPALRERELG  |
| 469 | Q96EY1 | 25  | PAISGRGARPP  |
| 470 | Q96EY1 | 340 | KSPVFRRDGAD  |
| 471 | Q96EY1 | 341 | SPVFRRDGADI  |
| 472 | P06746 | 182 | VCGSFRRGAE   |
| 473 | Q92997 | 73  | PCFNBRVVSWL  |
| 474 | Q92997 | 105 | PPPMERTGGIG  |

|     |        |      |               |
|-----|--------|------|---------------|
| 475 | Q92997 | 200  | DDSTSRFFSSST  |
| 476 | Q92997 | 219  | MRRHKRRRRKQ   |
| 477 | Q60487 | 16   | AAAARREPGGA   |
| 478 | Q60487 | 96   | GVCANRYLAMK   |
| 479 | Q60487 | 144  | YVALKRTGQYK   |
| 480 | Q54G21 | 235  | RKSAKRILVIP   |
| 481 | Q54G21 | 613  | VQTLHRLVEDN   |
| 482 | Q54G21 | 673  | VAQMRROIIDL   |
| 483 | Q54G21 | 746  | YALKIRAFKKS   |
| 484 | Q54G21 | 1031 | KDVIKRVTVVEY  |
| 485 | Q9R1E0 | 222  | HSKFIRVQNEG   |
| 486 | Q9R1E0 | 264  | KFAKSRGRAAK   |
| 487 | Q13283 | 32   | PDMLHRFYGKN   |
| 488 | Q13283 | 78   | CHTKIRHVDAH   |
| 489 | Q13283 | 302  | PQRDQRVREQR   |
| 490 | Q13283 | 304  | RDQRVREQRIN   |
| 491 | Q13283 | 317  | PQRGPRPIREA   |
| 492 | Q13283 | 331  | GDIEPRRMVRH   |
| 493 | Q13283 | 332  | DIEPRRMVRHP   |
| 494 | Q13283 | 370  | NVVELRINSGG   |
| 495 | P31943 | 49   | RFIYTRREGRPS  |
| 496 | P31943 | 199  | HYDPPRKLMM    |
| 497 | P04264 | 12   | SRSGYRSGGGF   |
| 498 | P04264 | 29   | IINYQRRTTSS   |
| 499 | P04264 | 239  | FINNLRRRVDQ   |
| 500 | P08729 | 13   | PVFTSRSAAFS   |
| 501 | P02687 | 129  | FGYGGRASDYK   |
| 502 | P02687 | 158  | FKLGGDRSRSG   |
| 503 | P15720 | 52   | DRHVPRRGFGK   |
| 504 | P15720 | 112  | GLSLTRFSWGG   |
| 505 | P25274 | 111  | GTVLSRFSWGA   |
| 506 | P11940 | 49   | RDMITRRSLGY   |
| 507 | P11940 | 67   | PADAERALDTM   |
| 508 | P11940 | 83   | KGKPVIRIMWSQ  |
| 509 | P11940 | 94   | RDPSLRKSGVG   |
| 510 | P11940 | 240  | FVSFERHEDAQ   |
| 511 | Q9JMB7 | 8    | GRARARARGRA   |
| 512 | Q9JMB7 | 10   | ARARARARGRARG |
| 513 | Q9JMB7 | 53   | GRGRQRGMVVG   |
| 514 | Q9JMB7 | 95   | LGVNTRQNLDH   |
| 515 | Q9JMB7 | 193  | NGEHVRITITL   |
| 516 | Q8CDG1 | 21   | PSQCVRMPGCW   |
| 517 | Q8CDG1 | 31   | WPQAPRPLEPA   |
| 518 | Q8CDG1 | 50   | RGLVFRKPEDS   |
| 519 | Q8CDG1 | 206  | VTMERKEKEL    |
| 520 | Q86WR7 | 186  | PVEHPRLLRSV   |
| 521 | P22626 | 62   | ASKRSRGGFV    |
| 522 | P22626 | 99   | KRAVAREESGK   |
| 523 | P22626 | 147  | EIITDRQSGKK   |
| 524 | P51991 | 167  | QSGKRGFAFV    |
| 525 | Q99729 | 28   | VPEASRGRGWT   |
| 526 | P14678 | 16   | QHIDYRMRCIL   |

|     |        |      |              |
|-----|--------|------|--------------|
| 527 | P14678 | 73   | GLVLLRGENLV  |
| 528 | P14678 | 108  | GPGIGRAAGRG  |
| 529 | P14678 | 209  | GIPPGRGTPMG  |
| 530 | Q14524 | 34   | AEKQARGSTTL  |
| 531 | Q14524 | 43   | TLQESREGLPE  |
| 532 | Q14524 | 222  | ALRTFRVLRAL  |
| 533 | Q14524 | 225  | TFRVLRALKTI  |
| 534 | Q14524 | 282  | RHKCVRNFTAL  |
| 535 | P23246 | 9    | DRFRSRGGGGG  |
| 536 | P23246 | 267  | GGPGRSEEKI   |
| 537 | P23246 | 315  | EDEFKRLFAKY  |
| 538 | P23246 | 342  | IKLESRALAEI  |
| 539 | P68363 | 221  | NLDIERPTYTN  |
| 540 | P07437 | 262  | MVFPFRLHFFM  |
| 541 | Q86V81 | 29   | GGGRGRGRAGS  |
| 542 | Q86V81 | 73   | GGGRNRPA PYS |
| 543 | Q86V81 | 155  | DVHFERKADAL  |
| 544 | Q86V81 | 204  | GMTRNRGAGGF  |
| 545 | O08583 | 38   | GSQGGRGGAVQ  |
| 546 | O08583 | 188  | QIDTQRPAQS   |
| 547 | O08583 | 196  | AQSINRGGMTR  |
| 548 | P31269 | 106  | AAPDGRYMRSW  |
| 549 | P31269 | 109  | DGRYMRSWLEP  |
| 550 | P31269 | 248  | LNLTERQVKIW  |
| 551 | P31269 | 258  | WFQNRMRMKKK  |
| 552 | P04049 | 316  | PVPAQRERAPV  |
| 553 | O76922 | 11   | NPVIARGRGRG  |
| 554 | O76922 | 26   | NVEANRGFAPS  |
| 555 | O76922 | 189  | LVTKSRAGENI  |
| 556 | Q9NR22 | 95   | LKDEVRTLTYR  |
| 557 | Q9NR22 | 204  | TVIFARDKWLK  |
| 558 | Q9NR22 | 218  | LMFPDRAALYV  |
| 559 | Q9NR22 | 300  | CLQIQRNDYVH  |
| 560 | Q9UBL3 | 108  | DEENGRQLGEV  |
| 561 | Q9UBL3 | 160  | NTYFLRKQANL  |
| 562 | Q92934 | 109  | LWAAQRYGREL  |
| 563 | Q7Q2B7 | 261  | KMYPSTRGDLHV |
| 564 | P11911 | 125  | RNPVPRPFLDM  |
| 565 | P11911 | 160  | TLLLFRKRWQN  |
| 566 | Q09472 | 237  | GQTGLRGPQPL  |
| 567 | Q09472 | 353  | AHKCQRREQAN  |
| 568 | Q09472 | 466  | PSSIERAYAAL  |
| 569 | Q09472 | 754  | MGYGPRMQQPS  |
| 570 | Q09472 | 883  | LHPPPRTPTP   |
| 571 | Q09472 | 915  | PQQQPRSQQST  |
| 572 | Q09472 | 1055 | KPEELRQALMP  |
| 573 | Q09472 | 1137 | NRKTSRVYKYC  |
| 574 | Q09472 | 1166 | GYCCGRKLEFS  |
| 575 | P03372 | 162  | RRQGGRERLAS  |
| 576 | P03372 | 243  | QACRLRKCYEV  |
| 577 | P03372 | 259  | GIRKDRRGGRM  |
| 578 | P03372 | 277  | DDGEGRGEVGS  |

|     |        |     |                       |
|-----|--------|-----|-----------------------|
| 579 | P03372 | 300 | PLMIK <b>R</b> SKKNS  |
| 580 | P03372 | 394 | IGLV <b>R</b> SMEHP   |
| 581 | P03372 | 434 | LATSS <b>R</b> FRMMN  |
| 582 | P03372 | 548 | MLDAH <b>R</b> LHAPT  |
| 583 | Q01844 | 138 | ATAPT <b>R</b> PQDGN  |
| 584 | Q01844 | 461 | GGLPP <b>R</b> EGRGM  |
| 585 | Q01844 | 518 | GNVQ <b>H</b> RAGDWQ  |
| 586 | P22509 | 80  | GRGG <b>R</b> GGKRG   |
| 587 | P22509 | 213 | NLAKK <b>R</b> TNIIP  |
| 588 | P22509 | 250 | QPDQ <b>T</b> RIVALN  |
| 589 | P35637 | 371 | VSFAT <b>R</b> RADFN  |
| 590 | P35637 | 472 | NYGDD <b>R</b> RGGRG  |
| 591 | P35637 | 514 | GKMDS <b>R</b> GEHRQ  |
| 592 | P03347 | 91  | YCVH <b>Q</b> RIEIKD  |
| 593 | P03347 | 150 | QAISP <b>R</b> TLNAW  |
| 594 | P03347 | 380 | TIMM <b>Q</b> RGNFRN  |
| 595 | P03347 | 464 | PFLQ <b>S</b> RPEPTA  |
| 596 | P03347 | 476 | PEES <b>F</b> RSGVET  |
| 597 | P68431 | 70  | KLPF <b>Q</b> RLVREI  |
| 598 | P62805 | 36  | TKPAI <b>R</b> RLARR  |
| 599 | P62805 | 41  | RRLAR <b>R</b> GGVKR  |
| 600 | P62805 | 56  | IYEET <b>R</b> GVLVK  |
| 601 | P17096 | 73  | GAAK <b>T</b> RKTTTT  |
| 602 | P17096 | 86  | RKPRG <b>R</b> PKKLE  |
| 603 | P31942 | 116 | PGPYD <b>R</b> PIGGR  |
| 604 | P31942 | 137 | MYDRM <b>R</b> RGGDG  |
| 605 | P31942 | 232 | IGADG <b>R</b> ATGEA  |
| 606 | O60506 | 60  | SDLDE <b>R</b> AIEAL  |
| 607 | O60506 | 286 | DKKKN <b>R</b> GF CFL |
| 608 | O60506 | 343 | KVLFV <b>R</b> NLANT  |
| 609 | O60506 | 520 | APPRG <b>R</b> AGYSQ  |
| 610 | Q07666 | 17  | SRSSG <b>R</b> SGSMD  |
| 611 | Q07666 | 213 | KEEEL <b>R</b> KGGDP  |
| 612 | Q07666 | 289 | RGVPV <b>R</b> GRGAA  |
| 613 | Q07666 | 354 | TAGIQ <b>R</b> IPLPP  |
| 614 | P08199 | 281 | PAPGK <b>R</b> KKEMT  |
| 615 | P08199 | 471 | GEKG <b>Q</b> RQERTG  |
| 616 | P08199 | 551 | MEIEG <b>T</b> IRLE   |
| 617 | P08199 | 597 | FEGSV <b>R</b> ARIVT  |
| 618 | Q28165 | 24  | SGPGR <b>R</b> RHLVP  |
| 619 | Q28165 | 125 | EAIKAR <b>V</b> REME  |
| 620 | O75925 | 28  | LGYAG <b>R</b> NKHGR  |
| 621 | O75925 | 163 | SDNSQ <b>R</b> FRETC  |
| 622 | O75925 | 296 | TVLLQ <b>R</b> LRKAG  |
| 623 | O75925 | 330 | ATTSL <b>R</b> VSLLC  |
| 624 | O75925 | 632 | HTVTN <b>R</b> SSTDT  |
| 625 | Q96PU8 | 43  | FNHLE <b>R</b> LLDEE  |
| 626 | Q96PU8 | 101 | FNFV <b>G</b> RILGPR  |
| 627 | Q96PU8 | 330 | VHPY <b>Q</b> RIVTAD  |
| 628 | Q96PU8 | 336 | IVTAD <b>R</b> AATGN  |
| 629 | Q92804 | 153 | SYHS <b>Q</b> RENYSH  |
| 630 | Q92804 | 169 | RRDVS <b>R</b> YGEDN  |



|     |        |     |             |
|-----|--------|-----|-------------|
| 631 | Q92804 | 187 | GGGRGRGGYDK |
| 632 | Q92804 | 195 | YDKDGRGPMTG |
| 633 | Q92804 | 326 | RPEFMRGGGSG |
| 634 | Q92804 | 373 | MNFARNSCNQ  |
| 635 | Q92804 | 395 | SGGDFRGRGYG |
| 636 | Q92804 | 441 | GYSGDRSGGGY |
| 637 | Q92804 | 526 | GYGGDRSRGGY |
| 638 | P09867 | 53  | DPNTKRSRFG  |
| 639 | P09867 | 178 | HNCEVRKALSK |
| 640 | P09867 | 218 | NDNFGRGGNFS |
| 641 | O00267 | 123 | DRSGARRLQNL |
| 642 | O00267 | 133 | LWRDQREEELG |
| 643 | O00267 | 246 | GVGNLRLGYWN |
| 644 | O00267 | 334 | RKKFKRPPQRL |
| 645 | O00267 | 416 | STGKEREHNFQ |
| 646 | O00267 | 747 | TISVDRQRLTT |
| 647 | Q15554 | 25  | SRSSGRARRGR |
| 648 | Q15554 | 66  | FHEALRAFRGS |
| 649 | Q15554 | 89  | QALLVRPLGKE |
| 650 | Q15554 | 200 | LLNIIREKNLA |
| 651 | Q15554 | 270 | VEKPPREPARQ |
| 652 | Q15554 | 361 | RMTISRVLLEE |
| 653 | Q15554 | 490 | VMIKDRWRMTK |
| 654 | Q5TAQ9 | 116 | EEQPRRRVQRK |
| 655 | Q96EY1 | 8   | ARCSTRWLLVV |
| 656 | Q96EY1 | 28  | SGRGARPPREG |
| 657 | Q96EY1 | 319 | DGQTVRMPVGK |
| 658 | Q96EY1 | 325 | MPVGKREIFIT |
| 659 | P06746 | 40  | KYNAYRKAASV |
| 660 | P06746 | 112 | GPSAARKFVDE |
| 661 | P06746 | 253 | KEYPHRRIDIR |
| 662 | P06746 | 299 | NEYTIRPLGVT |
| 663 | P06746 | 328 | IQWKYREPKDR |
| 664 | Q92997 | 231 | VSRIERSSSFS |
| 665 | Q60487 | 63  | IHPDGRVDGVR |
| 666 | Q60487 | 84  | LQAEDRGVSSI |
| 667 | Q60487 | 131 | NYNTYRSRKYS |
| 668 | Q9R1E0 | 21  | PLPRQRSCTWP |
| 669 | Q9R1E0 | 98  | AAAASRGLCGD |
| 670 | Q9R1E0 | 154 | TSSSRRNAWGN |
| 671 | Q9R1E0 | 266 | AKSRGRAAKKK |
| 672 | Q9R1E0 | 311 | NWSTFRPRTSS |
| 673 | Q13283 | 299 | PQRPQRDQVR  |
| 674 | Q13283 | 307 | RVREQRINIPP |
| 675 | Q13283 | 335 | PRRMVRHPDSH |
| 676 | P31943 | 81  | ETMGHRYVEVF |
| 677 | P31943 | 114 | NDGFVRLRGLP |
| 678 | P31943 | 224 | YNSIGRGAGFE |
| 679 | P31943 | 232 | GFERMRRGAYG |
| 680 | P31943 | 262 | SDRFGRLNYC  |
| 681 | P04264 | 179 | QKVKSREREQI |
| 682 | P04264 | 240 | INNLRRRVDQL |

|     |        |     |              |
|-----|--------|-----|--------------|
| 683 | P04264 | 241 | NNLRRRVDQLK  |
| 684 | P04264 | 403 | ISELNRVIQRL  |
| 685 | P08729 | 25  | RGAQVRLSSAR  |
| 686 | P08729 | 88  | SLQVRQEESE   |
| 687 | P08729 | 161 | QVDGGRLEAEL  |
| 688 | P08729 | 226 | EINFLRTLNET  |
| 689 | Q36736 | 21  | DQEFNRKMQEQ  |
| 690 | P02687 | 9   | KRPSQRSKYLA  |
| 691 | P02687 | 63  | GHHAARTTHYG  |
| 692 | P15720 | 53  | RHVPRRGGFGKD |
| 693 | P25274 | 63  | KDHAARTTHYG  |
| 694 | P25274 | 77  | QKSGHRPQDEN  |
| 695 | Q8IZS5 | 91  | GNEYGRNYFDP  |
| 696 | Q8IZS5 | 118 | REDDDRIFYNR  |
| 697 | Q8IZS5 | 221 | VTAVIRSRYY   |
| 698 | Q8IZS5 | 223 | AVIRSRYYRE   |
| 699 | P11940 | 44  | SIRVCRDMITR  |
| 700 | P11940 | 172 | KVFGVGRFKSRK |
| 701 | Q9JMB7 | 125 | FRLTSRPQWAL  |
| 702 | Q8CDG1 | 39  | EPAWGRAGPAG  |
| 703 | Q8CDG1 | 108 | SANMVRKDREE  |
| 704 | Q8CDG1 | 115 | DREEPRSSLPD  |
| 705 | Q86WR7 | 231 | RTPAARGPRSG  |
| 706 | Q86WR7 | 268 | AAREPBRRTLSR |
| 707 | P51991 | 16  | QPDGRRRRRR   |
| 708 | P51991 | 19  | SGRRRRRRGEE  |
| 709 | P51991 | 20  | GRRRRRRGEEG  |
| 710 | Q99729 | 194 | PKLNKRRGFVF  |
| 711 | Q99729 | 322 | GKSQRGGHQON  |
| 712 | P14678 | 94  | DTGIARVPLAG  |
| 713 | P14678 | 112 | GRAAGRGIPAG  |
| 714 | Q14524 | 219 | NVSALRTFRVL  |
| 715 | Q14524 | 376 | QDCWERLYQOT  |
| 716 | Q14524 | 433 | EEKEKRFQEAM  |
| 717 | P23246 | 32  | GLHDFRSPPPG  |
| 718 | P23246 | 287 | LSLLRRPGKKT  |
| 719 | P23246 | 298 | YTQRCRLFVGN  |
| 720 | P23246 | 407 | VIVDDRGRSTG  |
| 721 | P07437 | 62  | GKYVPRAILVD  |
| 722 | P07437 | 390 | FTAMFRRKAFL  |
| 723 | Q86V81 | 31  | GRGRGRAGSQG  |
| 724 | Q86V81 | 47  | AQAAARVNRGG  |
| 725 | O08583 | 50  | AARVNRGGGPM  |
| 726 | P39748 | 29  | KSYFGRKVAID  |
| 727 | P39748 | 47  | FLIAVRQGGDV  |
| 728 | P39748 | 261 | IEEIVRRLDPN  |
| 729 | P39748 | 320 | QFSEERIRSGV  |
| 730 | P31269 | 210 | STRKKRCPYTK  |
| 731 | P31269 | 257 | IWFQNRMKMK   |
| 732 | P04049 | 73  | TVVNVNRGMSL  |
| 733 | P04049 | 111 | KGKKARLDWNT  |
| 734 | P04049 | 218 | TMRMRRESVSR  |

|     |        |      |              |
|-----|--------|------|--------------|
| 735 | P04049 | 256  | LSQRQRSTSTP  |
| 736 | P46783 | 65   | EQFAWRHFYWY  |
| 737 | P46783 | 119  | PARLTRGEADR  |
| 738 | O76922 | 96   | DLVYSRPPGMT  |
| 739 | O76922 | 248  | NLENFRMQLWP  |
| 740 | O76922 | 291  | LSDAIRDSDDY  |
| 741 | Q9NR22 | 251  | DMTCIRDVAMK  |
| 742 | Q9UBL3 | 213  | MTTRQRPGKMT  |
| 743 | Q9UBL3 | 621  | TEVDGRRSPPW  |
| 744 | Q92934 | 20   | SSSAERGLGPS  |
| 745 | Q92934 | 115  | YGRELRRMSDE  |
| 746 | Q7Q2B7 | 146  | TSTYQRAIYNN  |
| 747 | Q7Q2B7 | 239  | MLYNERMLETY  |
| 748 | Q7Q2B7 | 308  | MKEYFRQPIVD  |
| 749 | Q7Q2B7 | 326  | MAKSIRHTTNF  |
| 750 | P11911 | 30   | GCQALRVEGGP  |
| 751 | P11911 | 55   | CENNGRNPINIT |
| 752 | P11911 | 120  | TYLRVRNPVPR  |
| 753 | Q09472 | 200  | SIGAGRGRQNM  |
| 754 | Q09472 | 362  | ANGEVRQCNLP  |
| 755 | Q09472 | 424  | NAGDKRNQOPI  |
| 756 | Q09472 | 613  | LVAYARKVEGD  |
| 757 | Q09472 | 648  | ELEEKRRTRLQ  |
| 758 | Q09472 | 651  | EKRRTLQKQN   |
| 759 | Q09472 | 695  | DPSMIRGSVPN  |
| 760 | Q09472 | 728  | PPIVPRQTPPL  |
| 761 | Q09472 | 838  | SPVPSRTPTPH  |
| 762 | Q09472 | 1067 | LEALYRQDPES  |
| 763 | Q09472 | 1234 | EQFSKRKNDTL  |
| 764 | Q09472 | 1281 | LKKSARTRKEN  |
| 765 | Q09472 | 1305 | TFLENRVNDFL  |
| 766 | Q09472 | 1311 | VNDFLRRQNHP  |
| 767 | Q09472 | 1312 | NDFLRRQNHPE  |
| 768 | Q09472 | 1391 | PPPNQRRVYIS  |
| 769 | Q09472 | 1405 | SVHFFRPKCLR  |
| 770 | P03372 | 211  | KAFFKRSIQGH  |
| 771 | P03372 | 233  | TIDKNRRKSCQ  |
| 772 | P03372 | 412  | NLLLDNRNQGKC |
| 773 | P03372 | 477  | KDHIHRVLDKI  |
| 774 | P03372 | 555  | HAPTSRGGASV  |
| 775 | Q01844 | 446  | KVSLARKKPPM  |
| 776 | Q01844 | 648  | DKGEHRQERRD  |
| 777 | Q01844 | 651  | EHRQERRDRPY  |
| 778 | P22509 | 64   | GGGGRRGGGFQ  |
| 779 | P22509 | 128  | VYGEKRVSISE  |
| 780 | P22509 | 204  | SHRSGRDLINL  |
| 781 | P22509 | 310  | LEPYERDHAVV  |
| 782 | P03347 | 15   | GGELDRWEKIR  |
| 783 | P03347 | 58   | TSEGCRQILGQ  |
| 784 | P03347 | 361  | PGHKARVLAEA  |
| 785 | P03347 | 406  | TARNCRAPRKK  |
| 786 | P03347 | 444  | PSYKGRPGNFL  |

|     |        |      |               |
|-----|--------|------|---------------|
| 787 | P17096 | 30   | GRGRPRKQPPV   |
| 788 | P31942 | 80   | GKHKERIGHRY   |
| 789 | P31942 | 200  | HFVHMRGLPFR   |
| 790 | O60506 | 142  | VTTGQRKYGGP   |
| 791 | O60506 | 192  | PIWDLRLMMDP   |
| 792 | O60506 | 203  | LTGLNRGYAFV   |
| 793 | O60506 | 366  | FGKLERVKKLLK  |
| 794 | O60506 | 448  | TRGRGRGGRGG   |
| 795 | O60506 | 501  | RGRGGRGARGA   |
| 796 | O60506 | 546  | GAQQQRGRGVR   |
| 797 | Q07666 | 186  | GNTIKRLQEET   |
| 798 | Q07666 | 302  | PPPVPRGRGVG   |
| 799 | P08199 | 561  | ELQGRGSPNA    |
| 800 | P08199 | 567  | GSPNARSQPSK   |
| 801 | Q28165 | 227  | DKESVRTSLAL   |
| 802 | Q28165 | 240  | SLFRGRQIKVI   |
| 803 | O75925 | 165  | NSQRFRETCFA   |
| 804 | Q96PU8 | 51   | DEEISRVRKDM   |
| 805 | Q96PU8 | 68   | GSTEKRS AELP  |
| 806 | Q96PU8 | 130  | GKGSMDKKKE    |
| 807 | Q92804 | 337  | GRRRGRGGYRG   |
| 808 | Q92804 | 343  | GGYRGRGGFQG   |
| 809 | Q92804 | 545  | GYGGDRSGGYG   |
| 810 | P09867 | 75   | AAMNARPHKVD   |
| 811 | P09867 | 97   | REDSQRPGAHL   |
| 812 | P09867 | 146  | GSGKKRGF AFV  |
| 813 | O00267 | 119  | VLDEDRSGARR   |
| 814 | O00267 | 469  | PAQELRKYFKM   |
| 815 | O00267 | 552  | VGVI VRLERET  |
| 816 | O00267 | 555  | IVRLE RETFQV  |
| 817 | O00267 | 668  | APMSPRISSPM   |
| 818 | O00267 | 700  | SRGRGRDNEL    |
| 819 | O00267 | 701  | RGRGRDNELI    |
| 820 | O00267 | 757  | TVGSR RPPGGMT |
| 821 | O00267 | 1005 | QTGVIRSVTGG   |
| 822 | P69697 | 55   | KKRRQRRRPPQ   |
| 823 | Q15554 | 27   | SSGRARRGRHE   |
| 824 | Q15554 | 99   | EHTVSRLLRVM   |
| 825 | Q15554 | 109  | MQCLSRIEEGE   |
| 826 | Q15554 | 492  | IKDRWR TMKRL  |
| 827 | P15056 | 95   | DALQQREQQLL   |
| 828 | P15056 | 178  | CGVTVRDSLKK   |
| 829 | P15056 | 443  | MKTLGRRDSSD   |
| 830 | Q5TAQ9 | 98   | NRVHDRSEEEE   |
| 831 | Q5TAQ9 | 122  | RVQRKRANRDQ   |
| 832 | Q5TAQ9 | 225  | WDWVR RQPVLD  |
| 833 | Q96EY1 | 41   | GAWLSRKLSVP   |
| 834 | Q96EY1 | 64   | ALLTLRPGVSL   |
| 835 | Q96EY1 | 151  | SDEVK RKQYDA  |
| 836 | Q96EY1 | 277  | RSTCRRCGGRG   |
| 837 | P06746 | 149  | GDFEK RIPREE  |
| 838 | P06746 | 254  | EYPHRRIDIRL   |

|     |        |     |              |
|-----|--------|-----|--------------|
| 839 | Q92997 | 113 | GIGDSRPPPSFH |
| 840 | Q92997 | 149 | ERPRRRDGPEH  |
| 841 | Q92997 | 168 | KGERRREPGGY  |
| 842 | Q92997 | 216 | SRLMRRHKRRR  |
| 843 | Q92997 | 221 | RHKRRRQKQKV  |
| 844 | Q60487 | 121 | CCCCERLESNN  |
| 845 | Q60487 | 133 | NTYRSRKYSSW  |
| 846 | Q54G21 | 194 | LENNQRVGSLF  |
| 847 | Q54G21 | 210 | SETPFRFVUGE  |
| 848 | Q9R1E0 | 29  | TWPLRPPEFNQ  |
| 849 | Q9R1E0 | 606 | GMFIERLDCCDM |
| 850 | Q13283 | 17  | GREFVRQYYTL  |
| 851 | Q13283 | 132 | HNDIFRYQDEV  |
| 852 | Q13283 | 247 | VQEDLRTFSWA  |
| 853 | Q13283 | 314 | NIPPQRGPRPI  |
| 854 | P31943 | 75  | ALKKDRETMGH  |
| 855 | P31943 | 175 | KKHKEIRIGHRY |
| 856 | P04264 | 8   | RQFSSRSYRS   |
| 857 | P04264 | 38  | SSSTRRSGGGG  |
| 858 | P04264 | 181 | VKSREREQIKS  |
| 859 | P04264 | 223 | VDTSTRTHNLE  |
| 860 | P04264 | 267 | MVEDYRNKYED  |
| 861 | P04264 | 277 | DEINKRTNAEN  |
| 862 | P08729 | 136 | SAKSSRLPDIF  |
| 863 | P08729 | 302 | HGDDLNRTRNE  |
| 864 | P02687 | 31  | FLPRHRDTGIL  |
| 865 | P02687 | 96  | NIVTPRTPPPS  |
| 866 | P15720 | 30  | RHGSPRHRDSG  |
| 867 | P15720 | 42  | LDSLGRFFGGD  |
| 868 | P25274 | 150 | QGTLSRLFKLG  |
| 869 | Q8IZS5 | 132 | LFDESROGEPQ  |
| 870 | Q8IZS5 | 195 | LEQEIIRSTSLH |
| 871 | P11940 | 265 | QIYVGRAQKKV  |
| 872 | Q9JMB7 | 80  | LSLAERGGRRR  |
| 873 | Q9JMB7 | 85  | RGGRRRDFHDL  |
| 874 | Q9JMB7 | 121 | STNHFRRLTSRP |
| 875 | Q9JMB7 | 174 | LFLPKRLQHKV  |
| 876 | Q86WR7 | 24  | PSCRLRAFSRG  |
| 877 | Q86WR7 | 40  | RSSSSRSRSFT  |
| 878 | Q86WR7 | 42  | SSSRSRSFTLD  |
| 879 | Q86WR7 | 172 | TPDPPRRELRA  |
| 880 | Q86WR7 | 234 | AARGPRSGDPG  |
| 881 | Q86WR7 | 269 | AREPRRTLSRA  |
| 882 | Q86WR7 | 273 | RRTLSRAAVSV  |
| 883 | P22626 | 38  | TEESLRNYEQ   |
| 884 | P22626 | 89  | HSIDGRVVEPK  |
| 885 | P51991 | 18  | DSGRRRRRGE   |
| 886 | P51991 | 68  | DCVVMRDPQTK  |
| 887 | P51991 | 74  | DPQTKRSRFGF  |
| 888 | P51991 | 246 | GNFGGRGGYGG  |
| 889 | Q99729 | 137 | HRLDGRVIDPK  |
| 890 | Q99729 | 171 | TEEKIREYFGE  |

|     |        |      |              |
|-----|--------|------|--------------|
| 891 | Q99729 | 321  | YGKSQRGGHQ   |
| 892 | P14678 | 25   | ILQDGRIFIGT  |
| 893 | P14678 | 61   | SKQAEEREEKRV |
| 894 | P14678 | 65   | EREKRVLGLV   |
| 895 | P14678 | 132  | LAGPVRGVGGP  |
| 896 | Q14524 | 104  | GKTIFRFSATN  |
| 897 | Q14524 | 190  | AFTFLRDPWNW  |
| 898 | Q14524 | 383  | YQOTLRSAGKI  |
| 899 | Q14524 | 451  | EALTI RGVDTV |
| 900 | P23246 | 358  | DDTPMRGRQLR  |
| 901 | P68363 | 79   | VIDEVRTGTYR  |
| 902 | P68363 | 123  | VLDRI RKLADQ |
| 903 | P68363 | 214  | IYDICRRNLDI  |
| 904 | P68363 | 402  | LMYAKRAFVHW  |
| 905 | P07437 | 156  | LISKIREEYPD  |
| 906 | P07437 | 320  | AVFRGRMSMKE  |
| 907 | Q86V81 | 58   | GPIRNRPAIAR  |
| 908 | Q86V81 | 71   | AGGGGRNRPAP  |
| 909 | Q86V81 | 141  | AVHYDRSGRSL  |
| 910 | Q86V81 | 190  | IDAQRPAQSV   |
| 911 | O08583 | 70   | AAGGGNRPAP   |
| 912 | O08583 | 201  | RGGMTRNRGSG  |
| 913 | P39748 | 103  | AKRSEERRAEAE |
| 914 | P39748 | 129  | EKFTRRLVKVT  |
| 915 | P39748 | 262  | EEIVRRLDPNK  |
| 916 | P31269 | 235  | YLTRDRRYEVA  |
| 917 | P04049 | 215  | PSLTMRRMRES  |
| 918 | P04049 | 216  | SLTMRRMRESV  |
| 919 | P46783 | 124  | RGEADRD TYRR |
| 920 | P46783 | 153  | TEFQFRGGFGR  |
| 921 | O76922 | 80   | SEGDP RGSVRG |
| 922 | O76922 | 132  | TIYQYRVDFTP  |
| 923 | O76922 | 145  | EATRLRRSFLY  |
| 924 | O76922 | 221  | NLILRRAMEGL  |
| 925 | O76922 | 233  | LKLVSRYYYDP  |
| 926 | Q9NR22 | 100  | RTLTYRNSMYH  |
| 927 | Q9UBL3 | 300  | GRGAKRKQQDG  |
| 928 | Q9UBL3 | 342  | NKDG YRILAE  |
| 929 | Q9UBL3 | 388  | LALHDRAPQLK  |
| 930 | Q92934 | 39   | SGKHHRQAPGL  |
| 931 | Q92934 | 70   | GAVEIRSRHSS  |
| 932 | Q92934 | 98   | FRGRSR SAPPN |
| 933 | Q92934 | 161  | DRNLGRGSSAP  |
| 934 | Q7Q2B7 | 112  | SVFNLRTEDSS  |
| 935 | Q7Q2B7 | 140  | MQDFVRTSTYQ  |
| 936 | Q09472 | 202  | GAGRGRQNMQY  |
| 937 | Q09472 | 397  | HCASSRQIISH  |
| 938 | Q09472 | 568  | STTGIRKQWHE  |
| 939 | Q09472 | 603  | AALKDRRMENL  |
| 940 | Q09472 | 705  | NQMMPRITPOS  |
| 941 | Q09472 | 1356 | ESFPYRTKALF  |
| 942 | P03372 | 157  | PNSDNRRQGGR  |

|     |        |     |              |
|-----|--------|-----|--------------|
| 943 | P03372 | 271 | KHKRQRDDGEG  |
| 944 | P03372 | 287 | SAGDMRAANLW  |
| 945 | P03372 | 335 | EYDPTRPFSEA  |
| 946 | Q01844 | 292 | GPGENRSMMSGP |
| 947 | P22509 | 141 | DKIEYRAWNPF  |
| 948 | P22509 | 201 | VEFSHRSGRDL  |
| 949 | P22509 | 261 | AHTFLRNGGHF  |
| 950 | P22509 | 320 | VVGVYRPPPKA  |
| 951 | P35637 | 218 | RGGRGRGGSGG  |
| 952 | P35637 | 441 | MNFSWRNECNO  |
| 953 | P03347 | 39  | IWASRELERF   |
| 954 | P03347 | 43  | SRELERFAVNP  |
| 955 | P03347 | 76  | GSEELRSLYNT  |
| 956 | P03347 | 214 | AAEWDRVHPVH  |
| 957 | P03347 | 229 | APGQMRPRGS   |
| 958 | P03347 | 232 | QMREPRGSDIA  |
| 959 | P62805 | 20  | GAKRHRKVLDR  |
| 960 | P62805 | 93  | VYALKRQRTL   |
| 961 | P17096 | 81  | TTTPGRKPRGR  |
| 962 | P31942 | 55  | MDYQGRSTGEA  |
| 963 | P31942 | 104 | FYDPPRLLGQ   |
| 964 | P31942 | 110 | RLLGQRP GPYD |
| 965 | P31942 | 169 | DGFDDMRDGR   |
| 966 | O60506 | 130 | KALLERTGYTL  |
| 967 | O60506 | 171 | VGKIPRDLFED  |
| 968 | O60506 | 244 | SVANNRLFVGS  |
| 969 | O60506 | 304 | AAQARRLMSG   |
| 970 | O60506 | 413 | PPDQKRKERKA  |
| 971 | O60506 | 478 | DYHNYRGGYED  |
| 972 | O60506 | 548 | QQQRGVRGA    |
| 973 | O60506 | 551 | RGRGVRGARGG  |
| 974 | Q07666 | 36  | RQTPSRQPPLP  |
| 975 | Q07666 | 159 | MKLKERVLPV   |
| 976 | Q07666 | 348 | PAPRARTAGIQ  |
| 977 | Q07666 | 420 | DWNGTRPSLKA  |
| 978 | Q07666 | 429 | KAPPARPVKGA  |
| 979 | P08199 | 385 | EKPKGRDSKKV  |
| 980 | Q28165 | 76  | EEEEPRPRAPP  |
| 981 | Q28165 | 127 | IKARVREMEEE  |
| 982 | Q28165 | 251 | PKRTNRPGIST  |
| 983 | O75925 | 15  | MVMSLRVSELQ  |
| 984 | O75925 | 201 | VQVQLRFCLSE  |
| 985 | O75925 | 245 | GVEPKRPSRPI  |
| 986 | O75925 | 298 | LLQRLRAKGIR  |
| 987 | O75925 | 309 | NPDHSRALIKE  |
| 988 | O75925 | 341 | PLGKMRLTIPC  |
| 989 | O75925 | 622 | SSNSLRSHSH   |
| 990 | Q96PU8 | 170 | EIKLKRAVEEV  |
| 991 | Q96PU8 | 319 | VATKVRRHDMR  |
| 992 | Q92804 | 403 | GYGGERGYRGR  |
| 993 | Q92804 | 408 | RGYRGRGGRGG  |
| 994 | P09867 | 14  | EPEQLRKLFIG  |

|      |        |     |                       |
|------|--------|-----|-----------------------|
| 995  | P09867 | 55  | NTKRSR <b>RG</b> FGFV |
| 996  | P09867 | 92  | KRAVSR <b>RED</b> SQR |
| 997  | P09867 | 232 | GFGGS <b>R</b> GGGGY  |
| 998  | O00267 | 310 | LKMIPR <b>ID</b> YDR  |
| 999  | O00267 | 365 | IFEGN <b>R</b> YSRKG  |
| 1000 | O00267 | 484 | KVIAG <b>R</b> FEGDT  |
| 1001 | O00267 | 733 | TESTAR <b>VEL</b> LHS |
| 1002 | O00267 | 749 | SVDRQ <b>RL</b> TTVG  |
| 1003 | O00267 | 756 | TTVGS <b>R</b> RPGGM  |
| 1004 | P69697 | 57  | RRQRR <b>R</b> PPQGS  |
| 1005 | Q15554 | 21  | GRRAS <b>R</b> SSGRA  |
| 1006 | Q15554 | 80  | DFRQ <b>I</b> RDIMQA  |
| 1007 | Q15554 | 223 | QOKML <b>R</b> FLESH  |
| 1008 | Q15554 | 277 | PARQ <b>L</b> RNPPTT  |
| 1009 | Q15554 | 332 | KNKR <b>P</b> RKDENE  |
| 1010 | P15056 | 146 | PTDVARS <b>N</b> PKS  |
| 1011 | P15056 | 252 | FCDFC <b>R</b> KLLFQ  |
| 1012 | P15056 | 271 | YKFH <b>Q</b> RCSTEV  |
| 1013 | P15056 | 354 | ADEDH <b>R</b> NQFGQ  |
| 1014 | P15056 | 437 | SEDR <b>N</b> RMKTLG  |
| 1015 | Q5TAQ9 | 115 | EEEQ <b>P</b> RRRVQR  |
| 1016 | Q5TAQ9 | 168 | LGSSAR <b>F</b> VYEA  |
| 1017 | P06746 | 183 | CGSFR <b>R</b> GAESS  |
| 1018 | P06746 | 283 | FNKNM <b>R</b> AHALE  |
| 1019 | Q92997 | 39  | KGVLQ <b>R</b> PSYKF  |
| 1020 | Q92997 | 143 | LVSAQ <b>R</b> ERPRR  |
| 1021 | Q92997 | 147 | QRER <b>P</b> RRRDGP  |
| 1022 | Q92997 | 157 | PEHAT <b>R</b> LNGTA  |
| 1023 | Q92997 | 166 | TAKGE <b>R</b> RREPG  |
| 1024 | Q92997 | 222 | HKRRR <b>R</b> KQKVS  |
| 1025 | Q92997 | 228 | KQKVS <b>R</b> IERSS  |
| 1026 | Q60487 | 57  | GGFFL <b>R</b> IHPDG  |
| 1027 | Q54G21 | 339 | NESNS <b>R</b> NSHSN  |
| 1028 | Q54G21 | 631 | VEKEN <b>R</b> MVTLK  |
| 1029 | Q9R1E0 | 147 | LAGQ <b>P</b> RKTSSS  |
| 1030 | Q9R1E0 | 153 | KTSSS <b>R</b> RNAWG  |
| 1031 | Q9R1E0 | 177 | SSAEK <b>R</b> LTLSQ  |
| 1032 | Q9R1E0 | 211 | WKNS <b>I</b> RHNLSL  |
| 1033 | Q13283 | 398 | KVLSN <b>R</b> PIMFR  |
| 1034 | P31943 | 29  | ADEVQ <b>R</b> FFSDC  |
| 1035 | P31943 | 188 | IFKSS <b>R</b> AEVRT  |
| 1036 | P04264 | 45  | GGGG <b>R</b> FSFCG   |
| 1037 | P04264 | 251 | KSDQ <b>S</b> RLDSEL  |
| 1038 | P04264 | 392 | HGDSV <b>R</b> NSKIE  |
| 1039 | P08729 | 253 | SMDNS <b>R</b> SLLD   |
| 1040 | P02687 | 23  | TMDHAR <b>H</b> GFLP  |
| 1041 | P02687 | 52  | RGAPK <b>R</b> GSBKD  |
| 1042 | P02687 | 78  | KAQGH <b>R</b> PQDEN  |
| 1043 | P02687 | 161 | GGRDS <b>R</b> SGSPM  |
| 1044 | P15720 | 6   | MASQ <b>K</b> RSSFRH  |
| 1045 | P15720 | 32  | GSPRH <b>R</b> DSGLL  |
| 1046 | P15720 | 63  | DIHAAR <b>A</b> SHVG  |



|      |        |     |             |
|------|--------|-----|-------------|
| 1047 | P15720 | 73  | GSIPQRSQHGR |
| 1048 | P11940 | 41  | PILSIRVCRDM |
| 1049 | P11940 | 176 | GRFKSRKEREK |
| 1050 | P11940 | 179 | KSRKEREAELG |
| 1051 | P11940 | 272 | QKKVERQTELK |
| 1052 | P11940 | 309 | GIDDERLRKEF |
| 1053 | Q9JMB7 | 12  | ARARGRARGQE |
| 1054 | Q8CDG1 | 45  | AGPAGRGLVFR |
| 1055 | Q8CDG1 | 293 | ELKSQRKTDDA |
| 1056 | Q86WR7 | 28  | LRAFSRGGSL  |
| 1057 | Q86WR7 | 35  | GSLESRSSSSR |
| 1058 | Q86WR7 | 218 | PTSPFREGRPG |
| 1059 | Q86WR7 | 226 | RPGEWRTPAAR |
| 1060 | P22626 | 12  | TVPLERKKREK |
| 1061 | P22626 | 82  | AAMAARPHSID |
| 1062 | P22626 | 129 | EEHHLRDYFEE |
| 1063 | P22626 | 153 | QSGKKRGGFV  |
| 1064 | P22626 | 190 | RKALSRQEMQE |
| 1065 | P51991 | 17  | PDSGRRRRRRG |
| 1066 | P51991 | 76  | QTKRSRGGFV  |
| 1067 | P51991 | 161 | EVMEDRQSGKK |
| 1068 | Q99729 | 110 | NTGRSRGGFI  |
| 1069 | Q99729 | 133 | DQKEHRLDGRV |
| 1070 | P14678 | 49  | DCDEFRKIKPK |
| 1071 | P14678 | 181 | PPPMGRGAPP  |
| 1072 | P14678 | 196 | PPPGMRPPMGP |
| 1073 | Q14524 | 8   | NFLLRGTSSF  |
| 1074 | Q14524 | 14  | GTSSFRFTRE  |
| 1075 | Q14524 | 15  | TSSFRFTRES  |
| 1076 | Q14524 | 122 | FHPIRRAAVKI |
| 1077 | P23246 | 236 | PKPPHRGGGEP |
| 1078 | P23246 | 286 | NLSLLRRPGEK |
| 1079 | P23246 | 296 | KTYTQRCLFV  |
| 1080 | P23246 | 360 | TPMRGRQLRVR |
| 1081 | P23246 | 363 | RGRQLRVRFAT |
| 1082 | P23246 | 376 | AALSVRNLSPY |
| 1083 | P68363 | 84  | RTGTYRQLFHP |
| 1084 | P68363 | 121 | DLVLDRIKLA  |
| 1085 | P68363 | 156 | SLLMERLSVDY |
| 1086 | P68363 | 229 | YTNLNRLISQI |
| 1087 | P68363 | 422 | EFSEAREDMAA |
| 1088 | P07437 | 121 | VLDVVRKEAES |
| 1089 | P07437 | 251 | LNADLRKLAVN |
| 1090 | P07437 | 309 | DPRHGRYLTVA |
| 1091 | P07437 | 391 | TAMFRRKAFH  |
| 1092 | Q86V81 | 17  | IIKLNRSQGG  |
| 1093 | Q86V81 | 23  | SQRGGRRGGRG |
| 1094 | Q86V81 | 27  | GRGGRRGGRA  |
| 1095 | Q86V81 | 38  | GSQGGRRGGAQ |
| 1096 | Q86V81 | 50  | AARVNRGGPI  |
| 1097 | Q86V81 | 56  | GGGPIRNRPAI |
| 1098 | O08583 | 47  | VQAAARVNRGG |

|      |        |      |              |
|------|--------|------|--------------|
| 1099 | P39748 | 327  | RSGVKRLSKSR  |
| 1100 | P31269 | 40   | LGQPPRQAATL  |
| 1101 | P31269 | 204  | NWLHARSTRKK  |
| 1102 | P31269 | 236  | LTRDRRYEVAR  |
| 1103 | P04049 | 40   | QFGYQRASDD   |
| 1104 | P04049 | 41   | FGYQRASDDG   |
| 1105 | P04049 | 89   | KALKVRGLQPE  |
| 1106 | P04049 | 191  | DWSNIRQLLLF  |
| 1107 | P04049 | 254  | GSLSQRQRSTS  |
| 1108 | P46783 | 95   | VPATLRRSRPE  |
| 1109 | P46783 | 103  | RPETGRPRPKG  |
| 1110 | P46783 | 129  | RDTYRRSAVPP  |
| 1111 | O76922 | 17   | GRGRGRKPNNV  |
| 1112 | Q9NR22 | 8    | MKHSSRCLLLR  |
| 1113 | Q9NR22 | 349  | DYLTVRGEEI   |
| 1114 | Q9NR22 | 350  | YLTVRGEEIY   |
| 1115 | Q9UBL3 | 398  | KISDDRLLTVVG |
| 1116 | Q9UBL3 | 461  | FSYSWRSKKGT  |
| 1117 | Q7Q2B7 | 206  | NNLTDRIIVIA  |
| 1118 | Q7Q2B7 | 318  | DTFDIRICMAK  |
| 1119 | Q7Q2B7 | 391  | HWYQVRCLLQT  |
| 1120 | Q7Q2B7 | 417  | LAANQRQSYDV  |
| 1121 | Q7Q2B7 | 535  | ISSTGRQQQQQ  |
| 1122 | P11911 | 111  | NNILKRSCGTY  |
| 1123 | Q09472 | 335  | ADPEKRKLIQQ  |
| 1124 | Q09472 | 1252 | CTECGRKMHQI  |
| 1125 | Q09472 | 1283 | KSARTRKENKF  |
| 1126 | Q09472 | 1292 | KFSAKRLPSTR  |
| 1127 | Q09472 | 1478 | KAVSERIVHDY  |
| 1128 | P03372 | 151  | PPAFYRPNSDN  |
| 1129 | P03372 | 164  | QGGRERLASTN  |
| 1130 | P03372 | 263  | DRRGGRMLKHK  |
| 1131 | P03372 | 352  | TNLADRELVHM  |
| 1132 | P03372 | 363  | INWAKRVPGFV  |
| 1133 | Q01844 | 268  | QOSSFRQDHPS  |
| 1134 | Q01844 | 330  | GSAGERGGFNK  |
| 1135 | Q01844 | 537  | QNFAWRTECNQ  |
| 1136 | P22509 | 46   | FGGGRRGRGGG  |
| 1137 | P22509 | 48   | GGGRGRGGGGG  |
| 1138 | P22509 | 98   | MVEPHRHEGVF  |
| 1139 | P22509 | 147  | AWNPFRSKLAA  |
| 1140 | P22509 | 230  | HPHKYRMLIAM  |
| 1141 | P35637 | 422  | GGGQQRAGDWK  |
| 1142 | P03347 | 264  | GEIYKRWIILG  |
| 1143 | P03347 | 286  | SILDIRQGPKE  |
| 1144 | P03347 | 294  | PKEPFRDYVDR  |
| 1145 | P03347 | 384  | QRGNFRNQKRM  |
| 1146 | P68431 | 27   | ATKAARKSAPA  |
| 1147 | P68431 | 53   | ALREIRRYQKS  |
| 1148 | P17096 | 56   | VPTPKRPRGRP  |
| 1149 | P31942 | 84   | ERIGHRYIEIF  |
| 1150 | P31942 | 90   | YIEIFRSSRSE  |

|      |        |     |              |
|------|--------|-----|--------------|
| 1151 | P31942 | 135 | GSMYDRMRGG   |
| 1152 | P31942 | 138 | YDRMRGGDGY   |
| 1153 | P31942 | 171 | FDDMRDGRGM   |
| 1154 | O60506 | 105 | KTYRQREKQGT  |
| 1155 | O60506 | 416 | QKRKERKAQRQ  |
| 1156 | O60506 | 420 | ERKAQRQAAKN  |
| 1157 | O60506 | 498 | VGARGRGGGA   |
| 1158 | O60506 | 512 | APSRGRGAAPP  |
| 1159 | O60506 | 533 | GPGSARGVRGA  |
| 1160 | Q07666 | 56  | SRGGARASPAT  |
| 1161 | P08199 | 391 | DSKKVRAARTL  |
| 1162 | P08199 | 458 | AEIDGRSVSLY  |
| 1163 | Q28165 | 172 | MEADARS IYVG |
| 1164 | O75925 | 33  | RNKHGRKHELL  |
| 1165 | O75925 | 62  | IKELYRRRFPO  |
| 1166 | O75925 | 64  | ELYRRRFPOKI  |
| 1167 | O75925 | 479 | EPSAKRTCPSL  |
| 1168 | Q96PU8 | 124 | CKIMVBRGKSM  |
| 1169 | Q96PU8 | 163 | EDAQNRAEIKL  |
| 1170 | Q96PU8 | 227 | AQAAPRIITGP  |
| 1171 | Q92804 | 175 | YGEDNRGYGGS  |
| 1172 | Q92804 | 383 | QCNEPRPEDSR  |
| 1173 | Q92804 | 397 | GDFRGRGYGGE  |
| 1174 | P09867 | 47  | DCVVMRDPNTK  |
| 1175 | O00267 | 124 | RSGARRLQNLW  |
| 1176 | O00267 | 280 | PKSWVRLKRG I |
| 1177 | O00267 | 283 | WVRLKRG IYKD |
| 1178 | O00267 | 315 | RIDYDRIKARM  |
| 1179 | O00267 | 329 | DWFAKRKKFKR  |
| 1180 | O00267 | 338 | KRPPQRLFDAE  |
| 1181 | O00267 | 494 | TGLIVRVEENF  |
| 1182 | O00267 | 577 | HQAVTRKKDNR  |
| 1183 | O00267 | 813 | LHDGSRTPAQS  |
| 1184 | Q15554 | 54  | EEAVNRWVLKF  |
| 1185 | Q15554 | 154 | VVESSRKLKVE  |
| 1186 | Q15554 | 330 | ALKNKRPKDE   |
| 1187 | Q15554 | 482 | YPFVNRTAVMI  |
| 1188 | P15056 | 158 | QKPIVRVFLPN  |
| 1189 | P15056 | 166 | LPNKQRTVVPA  |
| 1190 | P15056 | 172 | TVVPARCGVTV  |
| 1191 | P15056 | 389 | RDQGFRRGDGGS |
| 1192 | P15056 | 424 | SPGPQREKSS   |
| 1193 | P15056 | 444 | KTLGRDRSSDD  |
| 1194 | Q5TAQ9 | 33  | GAEEGRETS SG |
| 1195 | Q5TAQ9 | 59  | DGGPNRTSTES  |
| 1196 | Q5TAQ9 | 120 | RRRVQRKRANR  |
| 1197 | Q5TAQ9 | 184 | FVQRFRLQHGL  |
| 1198 | Q5TAQ9 | 224 | VWDWVRRQPVL  |
| 1199 | Q96EY1 | 18  | VVGTPrLP AIS |
| 1200 | Q96EY1 | 31  | GARPPREGVVG  |
| 1201 | Q92997 | 148 | RERPRRRDGPE  |
| 1202 | Q60487 | 15  | TAAAARREPGG  |

|      |        |     |                         |
|------|--------|-----|-------------------------|
| 1203 | Q60487 | 68  | RVDGVREKTD <del>P</del> |
| 1204 | Q54G21 | 12  | EEYSNRNAASS             |
| 1205 | Q54G21 | 320 | VAKLGRATGFT             |
| 1206 | Q54G21 | 672 | NVAQMRRQIID             |
| 1207 | Q54G21 | 759 | DEKNARKSDIE             |
| 1208 | Q54G21 | 800 | KLDMVRIKKRN             |
| 1209 | Q54G21 | 804 | VRIKKRNDDKV             |
| 1210 | Q9R1E0 | 83  | SEDFARAPGCV             |
| 1211 | Q9R1E0 | 324 | STISGRRLSPIM            |
| 1212 | Q13283 | 13  | PLLVGREFVRQ             |
| 1213 | Q13283 | 63  | QKEIHRKVMSQ             |
| 1214 | Q13283 | 320 | GPRPIREAGEQ             |
| 1215 | P31943 | 44  | GAQGIRFIYTR             |
| 1216 | P31943 | 116 | GFVRLRGLPFG             |
| 1217 | P31943 | 150 | VDFQGRSTGEA             |
| 1218 | P31943 | 206 | LMAMQRP GPYD            |
| 1219 | P31943 | 212 | PGPYDRPGAGR             |
| 1220 | P31943 | 259 | GFGSDRFG RDL            |
| 1221 | P04264 | 86  | ARGGGRGSGFG             |
| 1222 | P08729 | 77  | LLAPLRLDADP             |
| 1223 | P08729 | 86  | DPSLQVRQEE              |
| 1224 | P08729 | 149 | QIAGLRGQLEA             |
| 1225 | P08729 | 167 | LEAELRSMQDV             |
| 1226 | Q36736 | 53  | YEKFERMIKEH             |
| 1227 | P02687 | 29  | HGFLPRHRDTG             |
| 1228 | P02687 | 47  | FFGSDRGAPKR             |
| 1229 | P02687 | 112 | GLSLSRFSWGA             |
| 1230 | P15720 | 25  | TTDHARHGSPR             |
| 1231 | P25274 | 43  | LDSIGRFFSSD             |
| 1232 | Q8IZS5 | 105 | EEINPRQCATE             |
| 1233 | Q8IZS5 | 123 | RIFYNRLTKLF             |
| 1234 | Q8IZS5 | 224 | VIRSRYYREQ              |
| 1235 | P11940 | 50  | DMITRRSLGYA             |
| 1236 | P11940 | 290 | QDRITRYQGVN             |
| 1237 | Q9JMB7 | 144 | PLMEARRLRSA             |
| 1238 | Q9JMB7 | 187 | VFSQTRNGEHV             |
| 1239 | Q9JMB7 | 218 | YNIIFRRLKI              |
| 1240 | Q8CDG1 | 83  | LDTAFRPPSKR             |
| 1241 | Q8CDG1 | 140 | SVGWSRMLGRG             |
| 1242 | Q8CDG1 | 144 | SRMLGRGSSEV             |
| 1243 | Q8CDG1 | 181 | ARDPPRLPQPP             |
| 1244 | Q8CDG1 | 255 | ECKSMRFGMLK             |
| 1245 | Q8CDG1 | 326 | YNVVFRRVMKL             |
| 1246 | Q86WR7 | 189 | HPRLLRVPTP              |
| 1247 | P22626 | 21  | EKEQFRKLF IG            |
| 1248 | P22626 | 54  | DCVVMRDPASK             |
| 1249 | P22626 | 95  | VVEPKRAVARE             |
| 1250 | P22626 | 200 | EVQSSRSRGGG             |
| 1251 | P22626 | 266 | GYGGGRGGYGG             |
| 1252 | P22626 | 325 | NFGGSRNMGGP             |
| 1253 | P51991 | 21  | RRRRRGEEGH              |
| 1254 | P51991 | 96  | AAMCARPHKVD             |

|      |        |     |              |
|------|--------|-----|--------------|
| 1255 | P51991 | 214 | SAGSQRGRGGG  |
| 1256 | P51991 | 216 | GSQRGRGGGSG  |
| 1257 | Q99729 | 108 | DPNTGRSRGFG  |
| 1258 | Q99729 | 195 | KLNKRRGFVFI  |
| 1259 | Q99729 | 253 | RNRGNRGSGGG  |
| 1260 | P14678 | 18  | IDYRMRCILQD  |
| 1261 | P14678 | 172 | QYPPGRGGPPP  |
| 1262 | Q14524 | 18  | FRRFTRESLAA  |
| 1263 | Q14524 | 27  | AAIEKRMAEKQ  |
| 1264 | Q14524 | 53  | EEEAPRPQLDL  |
| 1265 | Q14524 | 121 | PFHPIRRRAVK  |
| 1266 | Q14524 | 277 | FMGNLRHKCVR  |
| 1267 | P23246 | 19  | GGFHRRGGGGG  |
| 1268 | P23246 | 44  | GLNQNRGPMGP  |
| 1269 | P23246 | 242 | GGGEPRGGROH  |
| 1270 | P23246 | 245 | EPRGGRQHHP   |
| 1271 | P23246 | 365 | RQLRVRFATHA  |
| 1272 | P68363 | 64  | GKHVPRAVFVD  |
| 1273 | P68363 | 373 | LAKVQRAVCML  |
| 1274 | P68363 | 390 | AEAWARLDHKF  |
| 1275 | P07437 | 46  | DLQLDRISVYY  |
| 1276 | P07437 | 86  | FGQIFRPDNFV  |
| 1277 | Q86V81 | 189 | QIDAQRPAQS   |
| 1278 | O08583 | 58  | GPMNRPAIAR   |
| 1279 | P39748 | 73  | FYRTIRMMENG  |
| 1280 | P39748 | 245 | GIGPKRAVDLI  |
| 1281 | P39748 | 322 | SEERIRSGVKR  |
| 1282 | P39748 | 339 | GSTQGRLLDDFF |
| 1283 | P31269 | 29  | ELSVGRYAPGT  |
| 1284 | P31269 | 166 | SPPVDREKQPS  |
| 1285 | P04049 | 67  | LPNKQRTVVNV  |
| 1286 | P04049 | 164 | LLNGFRCQTCG  |
| 1287 | P04049 | 275 | LPVDSRMIEDA  |
| 1288 | P04049 | 331 | EKNKIRPRGQR  |
| 1289 | P46783 | 98  | TLRRSRPETGR  |
| 1290 | P46783 | 113 | GLEGERPARLT  |
| 1291 | O76922 | 84  | PRGSVRGRRLI  |
| 1292 | O76922 | 143 | DVEATRLRRSF  |
| 1293 | O76922 | 220 | LNLILRRAMEG  |
| 1294 | O76922 | 260 | YQTSIRQHEND  |
| 1295 | O76922 | 278 | CHKVMRTETLY  |
| 1296 | O76922 | 302 | QSTFKRAVMGM  |
