# Supplementary material for: iMethyl-PseAAC: Identification of Protein Methylation Sites via a Pseudo Amino Acid Composition Approach
Source: Hindawi journal article supplement (doi:10.1155/2014/947416), 2014-01-01
Supplement: f1 [file 947416.f1.zip]

**Online Supporting Information S6. Seven negative subsets for studying Lys-methylation.** Each subset contains 217 negative samples randomly taken from the 1,518 negative samples in [Online Supporting Information S4](#) except for the 5<sup>th</sup> subset, which only contains 216 samples. None of the samples in one subset occurs in any other subset.

**(1) Subset 1 (217 samples)**

| Sample # | Protein ID | Site | Sequences   |
|----------|------------|------|-------------|
| 1        | P05141     | 49   | QITADKQYKGI |
| 2        | P05141     | 94   | FAFKDKYKQIF |
| 3        | P05141     | 96   | FKDKYKQIFLG |
| 4        | P05141     | 105  | LGGVDKRTQFW |
| 5        | P05141     | 245  | MQSGRKGTDIM |
| 6        | P05141     | 272  | GKAFFKGAWSN |
| 7        | Q9Y232     | 73   | DKRKNKKGKTE |
| 8        | Q9Y232     | 74   | KRKNKKGKTEY |
| 9        | Q9Y232     | 157  | ALVIGKDHESK |
| 10       | Q9Y232     | 162  | KDHESKNSQLF |
| 11       | P00042     | 11   | KGSEKKGATLF |
| 12       | P00042     | 17   | GATLFKTRCLQ |
| 13       | P00042     | 48   | GRQSGKAEGYS |
| 14       | P00042     | 60   | TDANIKKAVEW |
| 15       | P26358     | 58   | LQTEIKNQLCD |
| 16       | P26358     | 83   | YLAKVKSLLNK |
| 17       | P26358     | 177  | AKGPAKRKPQE |
| 18       | P26358     | 198  | IKEEDKDQDEK |
| 19       | Q5VTE0     | 41   | KRTIEKFEKEA |
| 20       | Q5VTE0     | 129  | EAGISKNGQTR |
| 21       | P0CE47     | 238  | ERGIKVGEEV  |
| 22       | O75367     | 117  | ELLAKKRGSKG |
| 23       | P62807     | 12   | SAPAPKKGSKK |
| 24       | P09988     | 123  | VTIQPKDMQLA |
| 25       | P69150     | 19   | AKAPRKQLASK |
| 26       | Q55BP0     | 30   | SSFPSKPVNEV |
| 27       | Q55BP0     | 65   | DLLIKKLPFQR |
| 28       | P61830     | 126  | QKKDIKLARRL |
| 29       | P62803     | 32   | IQGITKPAIRR |
| 30       | P04637     | 164  | AMAIYKQSQHM |
| 31       | P04637     | 386  | KKLMFKTEGPD |
| 32       | Q86L05     | 43   | KNYDTKDKRF  |
| 33       | Q86L05     | 53   | FSGQIKIGTVT |
| 34       | Q86L05     | 97   | IGPKNKKAIKK |
| 35       | Q86L05     | 105  | IKKLSKKYDAF |
| 36       | Q86L05     | 147  | EDMASKINDVK |
| 37       | Q86L05     | 152  | KINDVKSTVKF |
| 38       | P14909     | 34   | VEKTKKIKIID |
| 39       | P14909     | 80   | DELREKIAQYL |
| 40       | P14909     | 94   | YGTDVKKEEVI |
| 41       | P14909     | 105  | VTPGAKPALFL |

|    |        |     |              |
|----|--------|-----|--------------|
| 42 | P14909 | 142 | KLLGGKPIYAN  |
| 43 | P14909 | 194 | PNDVKKIVDIS  |
| 44 | P14909 | 257 | GYIVAKREIIQ  |
| 45 | P14909 | 285 | QKAAVKAFDTF  |
| 46 | P14909 | 313 | YDELTKVKGVE  |
| 47 | P39462 | 136 | IVPHYKMYKL   |
| 48 | P39462 | 263 | PKALAKQGKYV  |
| 49 | P22498 | 76  | QKMGLKIARLN  |
| 50 | P22498 | 138 | IFKDLKSRGLY  |
| 51 | P22498 | 256 | KSVSKKPVGII  |
| 52 | P22498 | 445 | RFGLLKVDYNT  |
| 53 | P0C835 | 53  | KYFRHKLPPDY  |
| 54 | P80053 | 16  | YTQOVKKLYKV  |
| 55 | P80053 | 54  | RGSDGKLTTFM  |
| 56 | P80053 | 170 | IKITGKVDFAV  |
| 57 | P13123 | 52  | EKDAPKELLDM  |
| 58 | P61991 | 40  | DEGGGKTGRGA  |
| 59 | P26358 | 284 | DEKDEKKHRSQ  |
| 60 | P26358 | 291 | HRSQPKDLAAK  |
| 61 | O75530 | 398 | VEDPHKAKCTT  |
| 62 | O75530 | 400 | DPHKAKCTTLT  |
| 63 | Q5VTE0 | 371 | AHIACKFAELK  |
| 64 | P81542 | 20  | DHAGHKVYAPA  |
| 65 | P81542 | 32  | PPVKEKALGIH  |
| 66 | P00219 | 20  | DHSGHKIYGPV  |
| 67 | O43524 | 242 | NPDGGKSGKAP  |
| 68 | Q08369 | 311 | PLAMRKEGIQT  |
| 69 | P16403 | 110 | FKLNKKAASGE  |
| 70 | P16403 | 117 | ASGEAKPKVKK  |
| 71 | P16403 | 130 | GTKPKKPVGAA  |
| 72 | P16403 | 139 | AAKKPKKAAGG  |
| 73 | P10412 | 22  | KTPVKKKARKS  |
| 74 | P10412 | 34  | GAAKRKASGPP  |
| 75 | P10412 | 121 | AKPKAKKAGAA  |
| 76 | P10412 | 136 | PAGAAKPKKA   |
| 77 | P10412 | 148 | GAATPKKSACK  |
| 78 | P16401 | 21  | EKSPAKKATK   |
| 79 | P16401 | 23  | SPAKKATKKA   |
| 80 | P16401 | 35  | GAGAAK RKATG |
| 81 | P16401 | 154 | KKAVK KTPKKA |
| 82 | O75367 | 157 | KKGARKSKKKQ  |
| 83 | O75367 | 236 | NTLEKKGKKEF  |
| 84 | P40283 | 13  | KPAEKKPASEK  |
| 85 | P40283 | 33  | KAPAEKPKKAG  |
| 86 | P40283 | 52  | AGGDKKKMKK   |
| 87 | Q41811 | 60  | TRGVRKIFLEN  |
| 88 | O14979 | 322 | QQQQQKGGRGA  |
| 89 | Q14103 | 231 | CFITFKEEEPV  |
| 90 | P16862 | 76  | VEAHLKELNSI  |
| 91 | P16862 | 197 | LNRPQKAIAVM  |
| 92 | P16862 | 525 | AVNENKIVRKP  |
| 93 | P16862 | 548 | EAIQAKDFKRA  |

|     |        |     |                               |
|-----|--------|-----|-------------------------------|
| 94  | O00159 | 24  | PHRPC <b>K</b> LALGS          |
| 95  | O00159 | 274 | KGQCA <b>K</b> VSSIN          |
| 96  | O00159 | 285 | DKSDW <b>K</b> VVRKA          |
| 97  | O00159 | 486 | DLVEE <b>K</b> FKGII          |
| 98  | O00159 | 488 | VEEK <b>F</b> KGIISI          |
| 99  | O00159 | 595 | ELSD <b>K</b> KRPETV          |
| 100 | O00159 | 605 | VATQ <b>F</b> KMSLLQ          |
| 101 | O00159 | 618 | EILQ <b>S</b> KEPAYV          |
| 102 | P13538 | 85  | SMNPP <b>K</b> YDKIE          |
| 103 | P13538 | 207 | ASGE <b>K</b> KKEEQS          |
| 104 | P13538 | 260 | FGAT <b>G</b> KLASAD          |
| 105 | P13538 | 354 | KTAI <b>Y</b> KLTGAV          |
| 106 | Q96RI1 | 36  | SMKPA <b>K</b> GVLTE          |
| 107 | Q96RI1 | 196 | ECRL <b>R</b> KCKEMG          |
| 108 | Q96RI1 | 251 | VTST <b>T</b> KSCREK          |
| 109 | Q96RI1 | 289 | TNKIL <b>K</b> EEFSA          |
| 110 | Q96RI1 | 335 | QIALL <b>K</b> GSAVE          |
| 111 | Q96RI1 | 474 | RVND <b>H</b> KFTPLL          |
| 112 | P11940 | 30  | AMLYE <b>K</b> FSPAG          |
| 113 | P11940 | 113 | KSID <b>N</b> KALYDT          |
| 114 | P11940 | 157 | ERAIE <b>K</b> MNGML          |
| 115 | P11940 | 277 | RQTEL <b>K</b> RKFEQ          |
| 116 | P06400 | 8   | PKTP <b>R</b> KTAATA          |
| 117 | P06400 | 80  | WLTWE <b>K</b> VSSVD          |
| 118 | P06400 | 122 | FTEL <b>Q</b> KNIEIS          |
| 119 | P06400 | 143 | IDTST <b>K</b> VDNAM          |
| 120 | P06400 | 164 | FALF <b>S</b> KLERTC          |
| 121 | P06400 | 228 | LDYFI <b>K</b> LSPPM          |
| 122 | P06400 | 327 | EIY <b>L</b> KNKDL            |
| 123 | P06400 | 341 | FLDHD <b>K</b> TLQTD          |
| 124 | P0CX43 | 91  | SVDDL <b>K</b> KLNKN          |
| 125 | P47914 | 47  | NMRFA <b>K</b> KHNKK          |
| 126 | P47914 | 55  | NKKGL <b>K</b> KMQAN          |
| 127 | Q969Q0 | 6   | MVNVP <b>K</b> TRRTF          |
| 128 | Q969Q0 | 58  | KPIFR <b>K</b> KAKTT          |
| 129 | Q969Q0 | 59  | PIFR <b>K</b> KAKTTK          |
| 130 | Q969Q0 | 89  | AIKR <b>C</b> KHFELG          |
| 131 | P0CX27 | 76  | RLECV <b>K</b> CKTRA          |
| 132 | P0CX27 | 89  | TLKR <b>C</b> KHFELG          |
| 133 | P02393 | 91  | GLKEA <b>K</b> DKVDG          |
| 134 | P02393 | 114 | EAE <b>E</b> A <b>K</b> KQLVE |
| 135 | P07472 | 98  | APATL <b>K</b> EGMSK          |
| 136 | Q12962 | 212 | YGINV <b>K</b> KPHYF          |
| 137 | Q04207 | 122 | GIQCV <b>K</b> KRDLE          |
| 138 | Q04207 | 221 | CDKV <b>Q</b> KEDIEV          |
| 139 | Q04207 | 301 | HRIE <b>E</b> KRKRTY          |
| 140 | Q04207 | 425 | SAPVP <b>K</b> STQAG          |
| 141 | Q53688 | 12  | RLQL <b>N</b> KNFNFG          |
| 142 | E5KWG9 | 29  | TASHD <b>K</b> VWPIL          |
| 143 | E5KWG9 | 135 | VSELV <b>K</b> LPSIP          |
| 144 | E5KWG9 | 278 | IASTP <b>K</b> GEYHK          |
| 145 | E5KWG9 | 283 | KGEY <b>H</b> KIASYY          |

|     |        |     |              |
|-----|--------|-----|--------------|
| 146 | E5KWG9 | 292 | YYQWQKRVEKL  |
| 147 | B6A879 | 93  | TTADV KPTENI |
| 148 | B6A879 | 173 | DGGGSKEEERG  |
| 149 | B6A879 | 290 | LRELQKKAHAM  |
| 150 | Q9L5X8 | 126 | FAHGLKPIVVI  |
| 151 | Q9L5X8 | 438 | MAPDGKGRVRM  |
| 152 | Q6NC90 | 9   | HIDPTKEVFAQ  |
| 153 | Q6NEZ3 | 66  | YKFNQKSNFSA  |
| 154 | Q6NEZ3 | 108 | GYKNAKLTKSS  |
| 155 | Q6NEZ3 | 120 | RINVGKNVKLD  |
| 156 | Q6NEZ3 | 178 | TFIPEKTILTN  |
| 157 | Q6NEZ3 | 341 | VMPGEKVSVSA  |
| 158 | Q9UKV3 | 103 | LVKRLKGALML  |
| 159 | P18281 | 16  | QGAALKHAETV  |
| 160 | P18281 | 34  | ENVTVKKVDRS  |
| 161 | P18281 | 52  | KPHELKHAETV  |
| 162 | Q9SJU4 | 246 | YDVAEKVWAEV  |
| 163 | Q9ZU52 | 120 | LYQSTKDGKTF  |
| 164 | Q9ZU52 | 123 | STKDGKTFVDC  |
| 165 | Q9ZU52 | 142 | GIKVDKGLSPL  |
| 166 | Q9ZU52 | 171 | SAEYKQGARF   |
| 167 | P62157 | 22  | FSLFDKDG DGT |
| 168 | P11118 | 76  | TLMSRKMHD TD |
| 169 | P07463 | 76  | SLMARKMKEQD  |
| 170 | P04573 | 43  | MDMLTKLGQTY  |
| 171 | P04573 | 133 | VEEAMKEADED  |
| 172 | P00889 | 208 | MDLIAKLPCVA  |
| 173 | P00063 | 16  | PAAGEKIFKTK  |
| 174 | P00063 | 107 | LIAYLKQSTAA  |
| 175 | P00078 | 19  | AARGEKLFKGR  |
| 176 | P00077 | 19  | AAKGEKIFKGR  |
| 177 | P00077 | 22  | GEKIFKGRAAQ  |
| 178 | P00077 | 98  | FAGIKKPQERA  |
| 179 | P00043 | 60  | YTDANKKKGVE  |
| 180 | P00076 | 7   | DAER GKLFES  |
| 181 | P00076 | 65  | EETLHKFLENP  |
| 182 | P00076 | 78  | YVPGTKMAFAG  |
| 183 | P00047 | 13  | PGDASKGANLF  |
| 184 | P00047 | 97  | GLKKNKDRNDL  |
| 185 | Q71V39 | 179 | VSAYIKKIGYN  |
| 186 | P02993 | 172 | FEEIKKEVSAY  |
| 187 | P02994 | 177 | TSNFIKKVGYN  |
| 188 | P02994 | 217 | WEKETKAGVVK  |
| 189 | Q96KQ7 | 139 | MTGAGKSPPSV  |
| 190 | P53991 | 49  | TTDMSKRTVPT  |
| 191 | P53991 | 55  | RTVPTKLEEGE  |
| 192 | P53991 | 69  | NTYSNKAPFKA  |
| 193 | P53991 | 81  | VRSVEKITGPK  |
| 194 | P53991 | 164 | DPETGKEDPAK  |
| 195 | P11416 | 94  | FVCQDKSSGYH  |
| 196 | P11416 | 166 | DRNKKKKEAPK  |
| 197 | P11416 | 360 | LLEALKVYVRK  |

|     |        |     |                      |
|-----|--------|-----|----------------------|
| 198 | P27064 | 227 | AEAIFK <b>S</b> QAET |
| 199 | P0A7J7 | 92  | KSGSGK <b>P</b> NKDK |
| 200 | Q5SLP6 | 9   | VVAVV <b>K</b> LQLPA |
| 201 | Q5SLP6 | 16  | QLPAG <b>K</b> ATPAP |
| 202 | Q5SLP6 | 70  | FTFVT <b>K</b> TPPAS |
| 203 | P0CX53 | 41  | GLSPK <b>K</b> VGEDI |
| 204 | P62986 | 114 | NCRK <b>K</b> KCGHTN |
| 205 | P55072 | 20  | AILKQ <b>K</b> NRPNR |
| 206 | P55072 | 190 | EGEPI <b>K</b> REDEE |
| 207 | P55072 | 211 | IGGCR <b>K</b> QLAQI |
| 208 | P55072 | 231 | HPALF <b>K</b> AIGVK |
| 209 | P05547 | 21  | DIDR <b>K</b> KAEVRK |
| 210 | P05547 | 26  | KAEVR <b>K</b> RLEEQ |
| 211 | P05547 | 46  | MTPER <b>K</b> KKLRL |
| 212 | O95785 | 54  | YLPVT <b>K</b> EGPRD |
| 213 | O95785 | 128 | PRLLE <b>K</b> HQAQR |
| 214 | O95785 | 277 | CSIYF <b>K</b> QKEHL |
| 215 | O95785 | 517 | DFPLS <b>K</b> PLLHG |
| 216 | O95785 | 702 | KHEER <b>K</b> CPYCP |
| 217 | O95785 | 754 | FSFQ <b>K</b> KKKVA  |

**(2) Subset 2 (217 samples)**

| Sample # | Protein ID | Site | Sequences             |
|----------|------------|------|-----------------------|
| 1        | P05141     | 10   | AVSFA <b>K</b> DFLAG  |
| 2        | P26358     | 160  | PRITR <b>K</b> STRQT  |
| 3        | P26358     | 179  | GPAKR <b>K</b> PQEEES |
| 4        | P26358     | 203  | KDQDE <b>K</b> RRRVT  |
| 5        | O75530     | 89   | CVNSL <b>K</b> EDHNQ  |
| 6        | O75530     | 184  | TMQCI <b>K</b> HYVGH  |
| 7        | O75530     | 293  | PFISQ <b>K</b> IHFDP  |
| 8        | O75530     | 322  | DLILS <b>K</b> SCENA  |
| 9        | Q5VTE0     | 146  | YTLGV <b>K</b> QLIVG  |
| 10       | Q5VTE0     | 179  | VSTYI <b>K</b> KKIGYN |
| 11       | Q5VTE0     | 215  | WFKGW <b>K</b> VTRKD  |
| 12       | Q5VTE0     | 255  | LQDVY <b>K</b> IGGIG  |
| 13       | P0CE47     | 249  | EIVGI <b>K</b> ETQKS  |
| 14       | P0CE47     | 300  | KPGTI <b>K</b> PHTKF  |
| 15       | P0CE47     | 304  | IKPHT <b>K</b> FESEV  |
| 16       | P0CE47     | 314  | VYILS <b>K</b> DEGGR  |
| 17       | O75367     | 8    | SRGG <b>K</b> KKSTKT  |
| 18       | P62807     | 13   | APAP <b>K</b> KGSKKA  |
| 19       | P62807     | 24   | VTKAQ <b>K</b> KDGKK  |
| 20       | P62807     | 29   | KKDGG <b>K</b> KRRSR  |
| 21       | P62807     | 31   | DGKKR <b>K</b> KRSRKE |
| 22       | P62807     | 86   | LAHYN <b>K</b> RSTIT  |
| 23       | Q55BN9     | 64   | SELLI <b>K</b> KLFPQ  |
| 24       | Q55BP0     | 64   | SDLLI <b>K</b> KLFPQ  |
| 25       | P62803     | 80   | EHAKR <b>K</b> TVTAM  |
| 26       | Q86L05     | 90   | DIEAL <b>K</b> KIGPK  |
| 27       | Q86L05     | 95   | KKIGP <b>K</b> NKKAI  |

|    |        |     |              |
|----|--------|-----|--------------|
| 28 | Q7M1B9 | 18  | AEKVLKSKTPV  |
| 29 | P14909 | 36  | KTKKIKIIDFG  |
| 30 | P14909 | 263 | REIIQKMGILA  |
| 31 | P14909 | 301 | MVSLFKKRRDV  |
| 32 | P14909 | 315 | ELTKVKGVEVS  |
| 33 | P14909 | 321 | GVEVSKPNGAF  |
| 34 | P22498 | 72  | HDNAQKMGLKI  |
| 35 | P22498 | 102 | NFDESKQDVTE  |
| 36 | Q9Y232 | 204 | PKSPVKSRTAV  |
| 37 | Q9Y232 | 348 | DIVVRKQDGFT  |
| 38 | Q9Y232 | 360 | ILLSTKSSENN  |
| 39 | P80053 | 20  | VKKLYKVGELL  |
| 40 | P80053 | 97  | MIMTWKNSLLL  |
| 41 | P80053 | 109 | PYGGGKGGVRV  |
| 42 | P80053 | 137 | IQAIYKYLSE   |
| 43 | P80053 | 313 | PKVKAKLIVEG  |
| 44 | P61991 | 21  | DISKIKKVWRV  |
| 45 | P26358 | 302 | RRPEEKKEPEKV |
| 46 | O75530 | 335 | CWKPGKMEDDI  |
| 47 | O75530 | 344 | DIDKIKPSESN  |
| 48 | Q5VTE0 | 376 | KFAELKEKIDR  |
| 49 | P55907 | 74  | HPASEKKADPV  |
| 50 | P81543 | 20  | THEGHKVYGPV  |
| 51 | P49949 | 20  | EHQGHKVYGPV  |
| 52 | O43524 | 195 | CVPYFKDKGDS  |
| 53 | Q08369 | 328 | NLNKSKTPAGP  |
| 54 | Q08369 | 402 | SAVCSKLSPOG  |
| 55 | P10412 | 17  | PAPAEKTPVKK  |
| 56 | P10412 | 127 | KAGAAKAKKPA  |
| 57 | P16401 | 22  | KSPAKKATKK   |
| 58 | P16401 | 26  | KKKATKKAAGA  |
| 59 | P16401 | 37  | GAAKRKATGPP  |
| 60 | P16401 | 143 | TPKKAKKAAGA  |
| 61 | P16401 | 150 | AAGAKKAVKKT  |
| 62 | O75367 | 235 | GNTLEKKGKKE  |
| 63 | P40283 | 43  | GKKLPKEAGAG  |
| 64 | P40283 | 111 | LARYNKKPTIT  |
| 65 | Q41811 | 17  | GKGARKRHRKV  |
| 66 | O14979 | 76  | GGAAIKGGRRR  |
| 67 | O14979 | 142 | KINASKNQDD   |
| 68 | O14979 | 149 | QQDDGKMFIGG  |
| 69 | Q14103 | 67  | ESEGAIDASK   |
| 70 | Q14103 | 111 | WDTTKDLKDY   |
| 71 | Q14103 | 129 | VDCTLKLDPIT  |
| 72 | Q14103 | 146 | GFVLFKESESV  |
| 73 | Q14103 | 176 | RAKAMKTKEPV  |
| 74 | Q14103 | 178 | KAMKTKEPVKK  |
| 75 | Q14103 | 255 | SKCEIKVAMSK  |
| 76 | P16862 | 69  | DEKINKNVEAH  |
| 77 | P16862 | 323 | IEELLKTNRIS  |
| 78 | P16862 | 336 | QYERMKHLNIC  |
| 79 | P16862 | 536 | LMESVKLTKAV  |

|     |                 |     |                               |
|-----|-----------------|-----|-------------------------------|
| 80  | P16862          | 539 | SVKLT <b>K</b> AVAEA          |
| 81  | P16862          | 588 | KDKRL <b>K</b> IAIVN          |
| 82  | O00159          | 527 | HFLTH <b>K</b> LADQR          |
| 83  | P13538          | 370 | LKFKQ <b>K</b> QREEQ          |
| 84  | Q96RI1          | 132 | SAGRI <b>K</b> GDEL C         |
| 85  | Q96RI1          | 172 | KNAVY <b>K</b> CKNGG          |
| 86  | Q96RI1          | 353 | EIFNK <b>K</b> LPSGH          |
| 87  | Q96RI1          | 434 | LQKLC <b>K</b> IHQPE          |
| 88  | P11940          | 104 | GNIFI <b>K</b> NLDKS          |
| 89  | P11940          | 213 | KDLFG <b>K</b> FGPAL          |
| 90  | P11940          | 254 | DEMNG <b>K</b> ELNGK          |
| 91  | P06400          | 65  | LCQK <b>L</b> KIPDHV          |
| 92  | P06400          | 130 | EISVH <b>K</b> FFNLL          |
| 93  | P06400          | 192 | SALVL <b>K</b> VSWIT          |
| 94  | P06400          | 279 | IEVLC <b>K</b> EHECN          |
| 95  | P06400          | 319 | VENLS <b>K</b> RYEEI          |
| 96  | P06400          | 427 | IGYIF <b>K</b> EKFAK          |
| 97  | P06400          | 429 | YIFKE <b>K</b> EFAKAV         |
| 98  | Q86L05          | 156 | VKSTV <b>K</b> FQLKK          |
| 99  | Q86L05          | 207 | KTLYV <b>K</b> TSMGP          |
| 100 | P0CX43          | 39  | LQVGL <b>K</b> NYDPQ          |
| 101 | P0CX43          | 97  | KLNKN <b>K</b> KLIKK          |
| 102 | P0CX43          | 98  | LNKN <b>K</b> KLIKKL          |
| 103 | P0CX43          | 102 | KKLIK <b>K</b> LSKKY          |
| 104 | P47914          | 22  | HRNGI <b>K</b> KPRSQ          |
| 105 | P47914          | 23  | RNGIK <b>K</b> KPRSQR         |
| 106 | P47914          | 48  | MRF <b>A</b> KKH <b>N</b> KKG |
| 107 | P47914          | 92  | KGVS <b>R</b> KLDRLA          |
| 108 | P47914          | 124 | CRP <b>K</b> AKAKA            |
| 109 | P47914          | 149 | PAQAP <b>K</b> RTOAP          |
| 110 | Q969Q0          | 44  | RRYDR <b>K</b> QSGYG          |
| 111 | Q969Q0          | 100 | GDKKR <b>K</b> GQVIQ          |
| 112 | P0CX27          | 78  | ECVKC <b>K</b> TRAQL          |
| 113 | P02393          | 6   | MSSIT <b>K</b> EQVVE          |
| 114 | P02393          | 72  | AAGAN <b>K</b> IGVIK          |
| 115 | P0A7K2          | 30  | SAMEE <b>K</b> FGVSA          |
| 116 | P0A7K2          | 109 | AEAL <b>K</b> KALEEA          |
| 117 | P07472          | 110 | DGDEA <b>K</b> TKLEE          |
| 118 | Q12962          | 42  | TAAEN <b>K</b> ASPAG          |
| 119 | Q12962          | 213 | GINVK <b>K</b> PHYFT          |
| 120 | Q04207          | 56  | STD <b>T</b> TK <b>T</b> HPTI |
| 121 | Q04207          | 93  | HELVG <b>K</b> DCRDG          |
| 122 | Q53688          | 185 | TLMSW <b>K</b> NPPSY          |
| 123 | Q53688          | 417 | DLRYY <b>K</b> ISPDQ          |
| 124 | E5K <b>W</b> G9 | 296 | QKRVE <b>K</b> LLRS <b>D</b>  |
| 125 | B6A879          | 11  | TYTSS <b>K</b> AMSDI          |
| 126 | B6A879          | 83  | ADEIN <b>K</b> IGNPT          |
| 127 | B6A879          | 374 | YVLLI <b>K</b> ELRSA          |
| 128 | B6A879          | 552 | LFSE <b>A</b> KGHFIS          |
| 129 | Q9L5X8          | 119 | RFV <b>T</b> Q <b>K</b> AFAHG |
| 130 | Q9L5X8          | 287 | GLGEL <b>K</b> ISDTI          |
| 131 | Q9L5X8          | 341 | LERLE <b>K</b> ELVHN          |

|     |        |     |             |
|-----|--------|-----|-------------|
| 132 | D0ZRV8 | 13  | LIELVKKVNRN |
| 133 | D0ZRV8 | 194 | WKAQQKMNEQR |
| 134 | Q6NEZ3 | 80  | MPESVKAGTGF |
| 135 | Q6NEZ3 | 105 | NLSGYKNAKLT |
| 136 | Q6NEZ3 | 111 | NAKLTKSSIRI |
| 137 | Q6NEZ3 | 202 | TTNADKPFATV |
| 138 | Q6NEZ3 | 369 | APEDVKYIDGT |
| 139 | Q6NEZ3 | 407 | WKNESKKNES  |
| 140 | Q6NEZ3 | 461 | YSNSLKDLVSI |
| 141 | D1BQI7 | 38  | YGRQLKTRIPP |
| 142 | Q9UKV3 | 143 | KOYLEKQOELL |
| 143 | Q9UKV3 | 223 | DEKPRKGERRS |
| 144 | Q9UKV3 | 315 | EIPRVKPEEMM |
| 145 | P18281 | 59  | AETVDKSGPAI |
| 146 | Q9SJU4 | 15  | KASPVKSDWVK |
| 147 | Q9SJU4 | 20  | KSDWVKGQSL  |
| 148 | Q9SJU4 | 131 | STTDGKMMVDV |
| 149 | Q9SJU4 | 132 | TTDGKMMVDVL |
| 150 | Q9SJU4 | 348 | QNTCLKTWGGK |
| 151 | Q9ZU52 | 271 | PGAEHKNKASP |
| 152 | Q9ZU52 | 348 | QGKPEKIEASQ |
| 153 | P62157 | 14  | QIAEFKEAFSL |
| 154 | P07463 | 14  | QIAEFKEAFAL |
| 155 | P07463 | 22  | FALFDKDGDT  |
| 156 | P07463 | 78  | MARKMKEQDSE |
| 157 | P04573 | 67  | GPKGDKKNIGP |
| 158 | P04573 | 68  | PKGDKKNIGPE |
| 159 | P04573 | 112 | DFDEFKFIMQK |
| 160 | P00889 | 14  | RLFGAKNASCL |
| 161 | P00889 | 34  | SSTNLKDILAD |
| 162 | P00889 | 233 | GAIDSKLDWSH |
| 163 | P00889 | 317 | LTQLQKEVGKD |
| 164 | P00889 | 327 | DVSDEKLRDYI |
| 165 | P00889 | 366 | REFALKHLPD  |
| 166 | P00889 | 393 | LLEQKAKNPW  |
| 167 | P00063 | 21  | KIFKTKCAQCH |
| 168 | P00078 | 61  | GYAYSKANAES |
| 169 | P00078 | 97  | SFAGMKKQER  |
| 170 | P00077 | 33  | CHTGAKGGANG |
| 171 | P00077 | 97  | SFAGIKKQER  |
| 172 | P00043 | 7   | PAPYEKGSEKK |
| 173 | P00076 | 8   | AERGGKLFESR |
| 174 | P00076 | 72  | LENPKKYVPGT |
| 175 | P00076 | 88  | GIKAKKDRQDI |
| 176 | P00047 | 87  | FIPGTKMAFGG |
| 177 | P02993 | 244 | SRPTEKPLRLP |
| 178 | P02994 | 129 | EAGISKDGQTR |
| 179 | P02994 | 154 | IVAVNKMDSVK |
| 180 | P02994 | 170 | FQEIVKETSNF |
| 181 | P02994 | 184 | VGYNPKTVPFV |
| 182 | Q96KQ7 | 179 | PEGQPKVHRAR |
| 183 | Q96KQ7 | 253 | EVTLTGDPGS  |



|     |        |     |             |
|-----|--------|-----|-------------|
| 184 | Q96KQ7 | 288 | VDSDSKSEVEA |
| 185 | Q96KQ7 | 344 | RRKAKKKWRKD |
| 186 | P53991 | 101 | IETEGKIPFWE |
| 187 | P53991 | 282 | EQNNRKGKMY  |
| 188 | P10587 | 33  | DWSAKKLVWVP |
| 189 | P10587 | 67  | QENGGKVTLSK |
| 190 | P10587 | 82  | KMNPPKFSKVE |
| 191 | P10587 | 183 | ESGAGKTENTK |
| 192 | P10587 | 189 | TENTKKVIQYL |
| 193 | P11416 | 109 | ACEGCKGFFRR |
| 194 | P11416 | 128 | TCHRDKNCIIN |
| 195 | P11416 | 134 | NCIINKVTRNR |
| 196 | P11416 | 171 | KKEAPKPECSE |
| 197 | P11416 | 227 | IDLWDKFSELS |
| 198 | P11416 | 234 | SELSTKCIKT  |
| 199 | P27064 | 164 | RDKLNKYGRPL |
| 200 | P27064 | 316 | FRVLAKALRMS |
| 201 | P27064 | 466 | VWKEIKFEFEA |
| 202 | P04717 | 252 | CEEMLKRAVFA |
| 203 | P04717 | 356 | DDYIKKDRSRG |
| 204 | P04992 | 21  | GVKEYKLTYYT |
| 205 | P04992 | 252 | CEEMMKRAVFA |
| 206 | P04992 | 463 | ACEVWKEIRFN |
| 207 | Q5SLP6 | 39  | IMEFVKAFNAA |
| 208 | Q5SLP6 | 109 | VLEIAKQKMPD |
| 209 | P0CX53 | 96  | DRKKDKNVKHS |
| 210 | P0CX53 | 99  | KDKNVKHSNGI |
| 211 | P62986 | 27  | TIENVKAKIQD |
| 212 | P62986 | 29  | ENVKAKIQDKE |
| 213 | P62986 | 112 | AVNCRKKKCGH |
| 214 | P55072 | 136 | FEVYLPYPFLE |
| 215 | O95785 | 105 | IVRTMKPHAEL |
| 216 | O95785 | 373 | YVQHAKLHMRE |
| 217 | O95785 | 479 | VDYFGKAEPST |

**(3) Subset 3 (217 samples)**

| Sample # | Protein ID | Site | Sequences   |
|----------|------------|------|-------------|
| 1        | P05141     | 33   | PIERVKLLLQV |
| 2        | P05141     | 92   | LNFAFKDKYKQ |
| 3        | P05141     | 166  | LVKIYKSDGIK |
| 4        | Q9Y232     | 17   | GKSRKKNWQYE |
| 5        | P00042     | 6    | PAPFKKGSEKK |
| 6        | P00042     | 28   | CHTVEKGGPHK |
| 7        | P00042     | 95   | GLKKEKDRNDL |
| 8        | P26358     | 29   | VRRRLKDLERD |
| 9        | P26358     | 45   | ECVKEKLNLLH |
| 10       | P26358     | 67   | CDLETCLRKEE |
| 11       | P26358     | 81   | EGYLAVKSLI  |

|    |        |     |             |
|----|--------|-----|-------------|
| 12 | P26358 | 130 | ANSPPKPLSKP |
| 13 | P26358 | 148 | SDGEAKPEPSP |
| 14 | O75530 | 70  | RKSWGKWKWKS |
| 15 | O75530 | 72  | SWGKWKWKS   |
| 16 | O75530 | 77  | KWKSCKYYSF  |
| 17 | O75530 | 250 | DLLGEKIMSCG |
| 18 | Q5VTE0 | 20  | HVDSGKSTTTG |
| 19 | Q5VTE0 | 51  | AAEMGKGSFKY |
| 20 | Q5VTE0 | 84  | KFETSKYYVTI |
| 21 | Q5VTE0 | 154 | IVGVNKMDSTE |
| 22 | Q5VTE0 | 172 | YEEIVKEVSTY |
| 23 | P0CE47 | 137 | IVFLNKCDMVD |
| 24 | P0CE47 | 283 | LLRGIKREEIE |
| 25 | P0CE47 | 325 | HTPFFKGYRPQ |
| 26 | O75367 | 96  | LNQLLKGVTIA |
| 27 | O75367 | 142 | KSPSQKPVSK  |
| 28 | O75367 | 143 | SPSQKPVSKK  |
| 29 | O75367 | 147 | KKPVSKKAGGK |
| 30 | O75367 | 152 | KKAGGKKGARK |
| 31 | O75367 | 153 | KAGGKKGARKS |
| 32 | P62807 | 16  | PKKGSKAVTK  |
| 33 | P62807 | 17  | KKGSKAVTKA  |
| 34 | O15819 | 126 | VTIMPKDIHLA |
| 35 | Q55BN9 | 123 | VTIMVKDIQLA |
| 36 | P61830 | 38  | TGGVKKPHRYK |
| 37 | P04637 | 24  | FSDLWKLLPEN |
| 38 | P04637 | 139 | FCQLAKTCPVQ |
| 39 | Q86L05 | 46  | DTKKDKRFSGQ |
| 40 | Q86L05 | 78  | CDEATKIGAEF |
| 41 | P80322 | 37  | GDISTKELGTI |
| 42 | P14909 | 31  | ARNVEKTKKIK |
| 43 | P14909 | 137 | YAEVVKLLGGK |
| 44 | P39462 | 313 | LAEAGKVKPMI |
| 45 | Q9Y232 | 312 | GVTASKRKFID |
| 46 | Q9Y232 | 314 | TASKRKFIDDR |
| 47 | P0C835 | 6   | MSSGKAVKVK  |
| 48 | P0C835 | 48  | DPETGKYFRHK |
| 49 | P80053 | 45  | RIIQVKIQIRG |
| 50 | P80053 | 231 | GYAGKFLSEM  |
| 51 | P80053 | 265 | KAIEIKEKTGS |
| 52 | P13123 | 22  | TSKIKKVVRVG |
| 53 | P61991 | 13  | YKGEEKQVDIS |
| 54 | P61991 | 53  | EKDAPKELLQM |
| 55 | P39476 | 13  | YKGEEKQVDIS |
| 56 | P26358 | 240 | EERDEKEEKRL |
| 57 | P26358 | 243 | DEKEEKRLRSQ |
| 58 | P26358 | 255 | KEPTPKQKLKE |
| 59 | P26358 | 259 | PKQKLKEEPDR |
| 60 | P26358 | 281 | EDGDEKDEKKH |
| 61 | P26358 | 285 | EKDEKHKRSQP |
| 62 | P26358 | 296 | KDLAAKRRPEE |
| 63 | Q5VTE0 | 273 | ETGVLPGMVV  |

|     |        |     |                               |
|-----|--------|-----|-------------------------------|
| 64  | P81539 | 13  | SLPVV <b>K</b> EEQGV          |
| 65  | P81539 | 19  | EEQGV <b>K</b> IYGTY          |
| 66  | P49949 | 73  | HPASE <b>K</b> KADPI          |
| 67  | O43524 | 270 | GRAAK <b>K</b> KAALQ          |
| 68  | O43524 | 455 | TIQEN <b>K</b> PATFS          |
| 69  | O43524 | 569 | SLGSA <b>K</b> HQQQS          |
| 70  | Q08369 | 320 | QTRKR <b>K</b> PKNLN          |
| 71  | Q08369 | 326 | PKNLN <b>K</b> SKTPA          |
| 72  | P16403 | 26  | KKKAA <b>K</b> KAGGT          |
| 73  | P16403 | 136 | PVGAA <b>K</b> KPKKA          |
| 74  | P16403 | 152 | PKKSA <b>K</b> KTPKK          |
| 75  | P16403 | 156 | AKKTP <b>K</b> KAKKP          |
| 76  | P10412 | 32  | SAGAA <b>K</b> RKASG          |
| 77  | P10412 | 139 | AAK <b>K</b> PKATGA           |
| 78  | P16401 | 67  | LAAL <b>K</b> KALAAG          |
| 79  | P16401 | 141 | GATP <b>K</b> KAKKAA          |
| 80  | O75367 | 160 | ARKS <b>K</b> KQGEV           |
| 81  | O75367 | 196 | LFLG <b>Q</b> KLNLIH          |
| 82  | O75367 | 250 | VLELR <b>K</b> KNGPL          |
| 83  | P40283 | 40  | PKAG <b>K</b> KLPKEA          |
| 84  | P40283 | 58  | KKMK <b>K</b> SVETY           |
| 85  | P40283 | 98  | NDIFE <b>K</b> LAQEA          |
| 86  | O14979 | 137 | FAEGS <b>K</b> INASK          |
| 87  | O14979 | 212 | ELKEH <b>K</b> LDGKL          |
| 88  | O14979 | 224 | DPKRA <b>K</b> ALKGK          |
| 89  | Q14103 | 242 | KKIME <b>K</b> KYHNV          |
| 90  | P16862 | 33  | IDFYT <b>K</b> FLSLE          |
| 91  | P16862 | 106 | DILAV <b>K</b> DTLNA          |
| 92  | P16862 | 144 | GVTST <b>K</b> NAVST          |
| 93  | P16862 | 276 | CMEF <b>K</b> KREGRL          |
| 94  | P16862 | 551 | QAKDF <b>K</b> RAMSL          |
| 95  | O00159 | 289 | WKVVR <b>K</b> KALTVI         |
| 96  | O00159 | 444 | NYCNE <b>K</b> LQQLF          |
| 97  | O00159 | 627 | YVRCI <b>K</b> PNDAK          |
| 98  | P13538 | 50  | KESFV <b>K</b> GTIQS          |
| 99  | P13538 | 56  | G <b>T</b> IQS <b>K</b> EGGKV |
| 100 | P13538 | 206 | AASGE <b>K</b> KKKEEQ         |
| 101 | P13538 | 273 | TYLLE <b>K</b> SRVTF          |
| 102 | P13538 | 366 | HYGNL <b>K</b> FKQKQ          |
| 103 | Q96RI1 | 158 | TCEG <b>C</b> KGFFRR          |
| 104 | Q96RI1 | 174 | AVYK <b>C</b> KNGGNC          |
| 105 | Q96RI1 | 224 | SKRLR <b>K</b> KNVKQH         |
| 106 | Q96RI1 | 384 | MFSFY <b>K</b> SIGEL          |
| 107 | Q96RI1 | 390 | SIGEL <b>K</b> MTQEE          |
| 108 | P11940 | 80  | DVIK <b>G</b> KPVRIM          |
| 109 | P11940 | 129 | NILS <b>C</b> KVVCDE          |
| 110 | P11940 | 229 | TDESG <b>K</b> SKGFG          |
| 111 | P11940 | 231 | ESGKS <b>K</b> GFGFV          |
| 112 | P11940 | 333 | EGGRS <b>K</b> GFGFV          |
| 113 | P11940 | 348 | PEEAT <b>K</b> AVTEM          |
| 114 | P06400 | 154 | SRL <b>L</b> KKYDVLV          |
| 115 | P06400 | 447 | GSQRY <b>K</b> LGVRL          |

|     |        |     |              |
|-----|--------|-----|--------------|
| 116 | P0CX43 | 18  | VKELLKYSNET  |
| 117 | P0CX43 | 105 | IKKLSKKYNAF  |
| 118 | P47914 | 15  | HNQSRKWHRNG  |
| 119 | P47914 | 63  | QANNAKAMSAR  |
| 120 | P47914 | 73  | RAEAIKALVKP  |
| 121 | P47914 | 126 | PKAKAKAKAKD  |
| 122 | P47914 | 130 | AKAKAKDQTKA  |
| 123 | Q969Q0 | 13  | RRTFCCKCGKH  |
| 124 | Q969Q0 | 14  | RTFCCKCGKHQ  |
| 125 | Q969Q0 | 22  | KHOPHKVTOYK  |
| 126 | Q969Q0 | 27  | KVTOYKKGKDS  |
| 127 | Q969Q0 | 97  | ELGGDKKRKGQ  |
| 128 | P0CX27 | 6   | MVNVPKTRKTY  |
| 129 | P0CX27 | 9   | VPKTRKTYCKG  |
| 130 | P0CX27 | 13  | RKTYCKGKTCR  |
| 131 | P0CX27 | 29  | KVTOYKAGKAS  |
| 132 | P02393 | 31  | KELEEKFGVSA  |
| 133 | P02393 | 102 | APSTLKEAVSK  |
| 134 | P0A7K2 | 66  | AAGANKVAVIK  |
| 135 | P0A7K2 | 96  | APAALKEGVSK  |
| 136 | Q04207 | 62  | THPTIKINGYT  |
| 137 | Q53688 | 216 | QESHSKILDLD  |
| 138 | Q53688 | 250 | SIIKNKIIIVE  |
| 139 | Q53688 | 302 | NFTAEEKISISE |
| 140 | Q53688 | 429 | HVFNQKRRGKI  |
| 141 | E5KWG9 | 16  | YSIIEKTAQVV  |
| 142 | E5KWG9 | 84  | HGLTPKTDHPV  |
| 143 | E5KWG9 | 258 | FERLIKSAFYD  |
| 144 | B6A879 | 148 | HYVGDKTKPKL  |
| 145 | B6A879 | 152 | DKTKPKLSAYI  |
| 146 | Q9L5X8 | 54  | SNDIEKERGIT  |
| 147 | Q9L5X8 | 63  | ITILAKNTAIN  |
| 148 | Q9L5X8 | 133 | IVVINKIDRPG  |
| 149 | Q9L5X8 | 254 | KTRNGKVGTVM  |
| 150 | Q9L5X8 | 427 | NIGLRKGELKD  |
| 151 | Q9L5X8 | 545 | NALKGKQLTNV  |
| 152 | D0ZRV8 | 14  | IELVKKVNRNK  |
| 153 | Q6NEZ3 | 92  | ALIKIKDISVS  |
| 154 | Q6NEZ3 | 208 | PFATVKVDPAD  |
| 155 | Q6NEZ3 | 238 | ATVPEKLNEKM  |
| 156 | Q6NEZ3 | 242 | EKLNEKMDGKV  |
| 157 | Q6NEZ3 | 311 | TELDTKKPEDT  |
| 158 | Q6NEZ3 | 403 | YDPEWKNESKK  |
| 159 | Q9UKV3 | 58  | PSTSRKMAELE  |
| 160 | Q9UKV3 | 70  | VTLDGKPLQAL  |
| 161 | Q9UKV3 | 91  | QRGLAKSGQKS  |
| 162 | P18281 | 71  | EDVHVKKVDRG  |
| 163 | Q9SJU4 | 10  | TATMLKASPVK  |
| 164 | Q9SJU4 | 58  | ADELVKTAKTI  |
| 165 | Q9SJU4 | 150 | GIKVDKGLVPL  |
| 166 | Q9SJU4 | 378 | LAQLGKYTGEG  |
| 167 | Q9ZU52 | 238 | LEVAEKVWSEV  |

|     |        |     |              |
|-----|--------|-----|--------------|
| 168 | P11118 | 144 | YEEFVKMMMSK  |
| 169 | P04573 | 81  | LTLCSKWVRQD  |
| 170 | P04573 | 153 | FMDLIKSKNA   |
| 171 | P00044 | 11  | AGSAKKGATLF  |
| 172 | P00063 | 35  | KGAGHKQGNL   |
| 173 | P00043 | 11  | EKGSEKKGANL  |
| 174 | P00070 | 17  | PTTGEKIFKTK  |
| 175 | P02993 | 84  | KFETAKYYVTI  |
| 176 | P02993 | 171 | RFEIIEKKEVSA |
| 177 | P02994 | 44  | IEKFEKEAAEL  |
| 178 | P02994 | 178 | SNFIKKVGYNP  |
| 179 | Q96KQ7 | 53  | EETLPKATPDS  |
| 180 | Q96KQ7 | 122 | PSSPSKGGSCP  |
| 181 | Q96KQ7 | 229 | LAKRRKLNSGG  |
| 182 | Q96KQ7 | 348 | KKKWRKDSPWV  |
| 183 | Q96KQ7 | 354 | DSPWVKPSRKR  |
| 184 | Q96KQ7 | 361 | SRKRRKREPPR  |
| 185 | P53991 | 73  | NKAPFKAKVRS  |
| 186 | P53991 | 251 | GNSDAKLYDEE  |
| 187 | P53991 | 262 | LQAIKAYPGQ   |
| 188 | P10587 | 85  | PPKFSKVEDMA  |
| 189 | P10587 | 142 | IIDMYKGGKRH  |
| 190 | P68696 | 81  | RSIYGKKSAG   |
| 191 | P68696 | 82  | SIYGKKSAGV   |
| 192 | P68696 | 94  | TVKTSKSILVG  |
| 193 | P68696 | 116 | ANVVEKLADYL  |
| 194 | P11416 | 155 | DVGMSKESVRN  |
| 195 | P11416 | 207 | LCQLGKYTTNN  |
| 196 | P27064 | 146 | PTAYIKTFQGP  |
| 197 | P27064 | 463 | ACEVWKEIKFE  |
| 198 | P04717 | 146 | PYAYVKTFOGP  |
| 199 | P0A7J7 | 81  | AAVLLKKAAGI  |
| 200 | P0A7J7 | 97  | KPNKDKVGKIS  |
| 201 | P0A7J7 | 113 | EIAQTKAADMT  |
| 202 | Q5SLP6 | 86  | AAGLEKGAHKP  |
| 203 | P0CX53 | 48  | GEDIAKATKEF  |
| 204 | P0CX53 | 57  | EFKGIKVTVQL  |
| 205 | P62986 | 11  | KTLTGKTITLE  |
| 206 | P62986 | 48  | LIFAGKQLEDG  |
| 207 | P62986 | 93  | KYNCDKMICRK  |
| 208 | P55072 | 8   | SGADSKGDDL   |
| 209 | P55072 | 18  | STAILKQKNRP  |
| 210 | P55072 | 45  | SLSQPKMDELQ  |
| 211 | P55072 | 60  | DTVLLKGGKRR  |
| 212 | P55072 | 62  | VLLKGKRRREA  |
| 213 | P55072 | 312 | DAIAPKREKTH  |
| 214 | P05547 | 11  | AAEEAKKQDD   |
| 215 | P05547 | 34  | EEQSLKQKKG   |
| 216 | P05547 | 63  | AEELKKEQERK  |
| 217 | O95785 | 339 | IEEIQKQKQVP  |

## (4) Subset 4 (217 samples)

| Sample # | Protein ID | Site | Sequences    |
|----------|------------|------|--------------|
| 1        | P05141     | 43   | VQHASKQITAD  |
| 2        | P05141     | 163  | GDCLVKIYKSD  |
| 3        | P05141     | 171  | KSDGIKGLYQG  |
| 4        | P05141     | 206  | MLPDPKNTHIV  |
| 5        | Q9Y232     | 116  | RRHTEKQKEST  |
| 6        | P00042     | 33   | KGGPHKVGPNL  |
| 7        | P26358     | 188  | ESERAKSDESI  |
| 8        | P26358     | 233  | GTRTEKKEERD  |
| 9        | Q5VTE0     | 100  | HRDFIKNMITG  |
| 10       | P0CE47     | 38   | TTVLAKTYGGA  |
| 11       | P0CE47     | 253  | IKETQKSTCTG  |
| 12       | O75367     | 7    | SSRGGKKKSTK  |
| 13       | O75367     | 121  | KKRGSKGKLEA  |
| 14       | O75367     | 137  | PAKKAKSPSQK  |
| 15       | P69150     | 54   | LREIRKYQKST  |
| 16       | P69150     | 123  | VTIMTKDMQLA  |
| 17       | P59226     | 57   | IRKYQKSTELL  |
| 18       | P62803     | 60   | TRGVLKVFLN   |
| 19       | P62803     | 78   | YTEHAKRKTVT  |
| 20       | P62803     | 92   | VVYALKRQGRT  |
| 21       | P04637     | 319  | SSPQPKKKPLD  |
| 22       | P04637     | 320  | SPQPKKKPLDG  |
| 23       | P04637     | 357  | DAQAGKEPGGS  |
| 24       | Q86L05     | 61   | TVTCKPKLSVCV |
| 25       | Q86L05     | 133  | LNKVGKFPDLL  |
| 26       | Q7M1B9     | 57   | RLTIAKVNTDD  |
| 27       | P80322     | 6    | SDDYVKARVMF  |
| 28       | P80322     | 12   | ARVMFKEEQIS  |
| 29       | P14909     | 51   | DLPTFKRIRDA  |
| 30       | P14909     | 58   | IRDAAKEALDQ  |
| 31       | P14909     | 169  | QSKISKRTKMI  |
| 32       | P14909     | 242  | VNGFSKTFST   |
| 33       | P14909     | 354  | KLIEEKGVVTI  |
| 34       | P39462     | 22   | EIGVCPKGPQ   |
| 35       | P39462     | 73   | HEIAGKIEEVG  |
| 36       | P39462     | 239  | RITESKGVDAV  |
| 37       | P39462     | 259  | LSVYPKALAKQ  |
| 38       | P39462     | 315  | EAGKVKPMITK  |
| 39       | P39462     | 338  | NLENFKAIGRQ  |
| 40       | P22498     | 35   | NTDWYKVVHDP  |
| 41       | P22498     | 251  | AYDGIKSVSKK  |
| 42       | P0C835     | 9    | GKKAVKVKTPA  |
| 43       | P80053     | 17   | TQQVKKLYKVG  |
| 44       | P80053     | 207  | KEAANKFIGGV  |
| 45       | P80053     | 304  | ENVINKFNAPK  |
| 46       | P80053     | 415  | VVRAMKARGIL  |
| 47       | P13123     | 13   | YKGEEKVDTS   |
| 48       | P13123     | 21   | DTSKIKKVVWRV |

|     |        |     |             |
|-----|--------|-----|-------------|
| 49  | P13123 | 39  | YDDNGKTGRGA |
| 50  | P13123 | 48  | GAVSEKDAPKE |
| 51  | P26358 | 250 | LRSQTKIPTPK |
| 52  | O75530 | 375 | MDFWQKMLALG |
| 53  | Q5VTE0 | 392 | LEDGPKFLKSG |
| 54  | P55907 | 75  | PASEKKADPVN |
| 55  | O43524 | 259 | MDNSNKYTKSR |
| 56  | Q08369 | 318 | GIQTRKRKPKN |
| 57  | P16403 | 21  | EKAPVKKKAAK |
| 58  | P16403 | 63  | SLAALKKALAA |
| 59  | P16403 | 97  | TLVQTKGTGAS |
| 60  | P16403 | 122 | KPKVKKAGGTK |
| 61  | P16403 | 127 | KAGGTKPKKPV |
| 62  | P16403 | 129 | GGTKPKKPVGA |
| 63  | P10412 | 23  | TPVKKKARKSA |
| 64  | P10412 | 129 | GAAKAKKPAGA |
| 65  | P16401 | 133 | AAKAKKPAGAT |
| 66  | O75367 | 226 | ADIDLKDDLGN |
| 67  | O75367 | 239 | EKKGGKEFVEA |
| 68  | P40283 | 36  | AEKKPKAGKKL |
| 69  | P40283 | 57  | KKMKKKSJET  |
| 70  | P40283 | 69  | KIYIFKVLKQV |
| 71  | P40283 | 142 | VSEGTKAVTKF |
| 72  | Q41811 | 80  | EHARRKTVTAM |
| 73  | O14979 | 209 | KVLELKEHKLD |
| 74  | O14979 | 250 | SEEQIKYFGA  |
| 75  | O14979 | 269 | LPMDTKTNERR |
| 76  | O14979 | 288 | DEEPVKLLES  |
| 77  | O14979 | 302 | QIGSGKCEIKV |
| 78  | Q14103 | 98  | QREEWKFIGG  |
| 79  | Q14103 | 153 | SESVDKVMQK  |
| 80  | Q14103 | 158 | KVMDQKEHKLN |
| 81  | Q14103 | 218 | LPMDNKTNKRR |
| 82  | Q14103 | 341 | QSGYGKVSRRG |
| 83  | P16862 | 58  | DSISLKILLRP |
| 84  | P16862 | 225 | RSALFKGCRAF |
| 85  | P16862 | 248 | GPEYIKFHWI  |
| 86  | P16862 | 432 | CDIVSKHRSRG |
| 87  | P16862 | 585 | KLPKDKRLKIA |
| 88  | O00159 | 281 | SSINDKSDWKV |
| 89  | O00159 | 361 | RKIIAKGEELL |
| 90  | O00159 | 455 | IELTLKSEQEE |
| 91  | O00159 | 561 | TGFLDKNNDLL |
| 92  | O00159 | 578 | TMCSSKNPIMS |
| 93  | P13538 | 31  | IEAQNKPFDK  |
| 94  | P13538 | 88  | PPKYDKIEDMA |
| 95  | P13538 | 208 | SKEKKKEEQSG |
| 96  | P13538 | 297 | IMSNKKPELID |
| 97  | P13538 | 386 | TEVADKAAYLM |
| 98  | P13538 | 400 | SAELLKALCYP |
| 99  | P11940 | 108 | IKNLDKSIDNK |
| 100 | P11940 | 167 | LLNDRKVFVGR |

|     |                     |     |                          |
|-----|---------------------|-----|--------------------------|
| 101 | P11940              | 221 | PALSVK <del>V</del> MTDE |
| 102 | P11940              | 246 | HEDAQ <del>K</del> AVDEM |
| 103 | P11940              | 312 | DERLR <del>K</del> EFSPP |
| 104 | P11940              | 371 | ALAQR <del>K</del> EERQA |
| 105 | P11940              | 512 | TVPOY <del>K</del> YAAGV |
| 106 | P06400              | 94  | GGYIQ <del>K</del> KKELW |
| 107 | P06400              | 236 | PPMLL <del>K</del> EPYKT |
| 108 | P06400              | 417 | KESIL <del>K</del> RVKDI |
| 109 | Q86L05              | 195 | LVSL <del>L</del> KKGWQN |
| 110 | P0CX43              | 54  | FSGSL <del>K</del> LPNCP |
| 111 | P0CX43              | 92  | VDDL <del>K</del> KLKNK  |
| 112 | P0CX43              | 133 | LSKAG <del>K</del> FPTPV |
| 113 | P0CX43              | 160 | IKFQL <del>K</del> KVLCL |
| 114 | P0CX43              | 196 | VSLL <del>K</del> KNWQNV |
| 115 | P47914              | 87  | KPKIP <del>K</del> GVSRK |
| 116 | P47914              | 106 | HPKL <del>G</del> KRARAR |
| 117 | P47914              | 114 | RARIA <del>K</del> GLRLC |
| 118 | Q969Q0              | 30  | QYKKG <del>K</del> DSLYA |
| 119 | Q969Q0              | 64  | KAKTT <del>K</del> KIVLR |
| 120 | Q969Q0              | 65  | AKTT <del>K</del> KIVLRL |
| 121 | Q969Q0              | 80  | PNCRS <del>K</del> RMLAI |
| 122 | P0CX27              | 32  | QYKAG <del>K</del> ASLFA |
| 123 | P0CX27              | 63  | FHKKA <del>K</del> TTKKV |
| 124 | P0CX27              | 66  | KAKTT <del>K</del> KVVLR |
| 125 | P0CX27              | 98  | LGGE <del>K</del> KQKGOA |
| 126 | P02393              | 26  | LSEFI <del>K</del> ELEEK |
| 127 | P07472              | 103 | KEGMS <del>K</del> EDGDE |
| 128 | Q12962              | 175 | ALQH <del>C</del> KMKGTA |
| 129 | Q04207              | 37  | MRFRY <del>K</del> CEGRS |
| 130 | Q04207              | 123 | IQC <del>V</del> KKRDLEQ |
| 131 | Q04207              | 315 | KSIM <del>K</del> KSPFNG |
| 132 | Q53688              | 140 | DTVIS <del>K</del> GLLKI |
| 133 | Q53688              | 144 | SKGL <del>L</del> KIVKDG |
| 134 | Q53688              | 265 | FQEEL <del>K</del> LNSDG |
| 135 | Q53688              | 379 | PEAYT <del>K</del> LQOYM |
| 136 | E5K <del>W</del> G9 | 68  | FTML <del>P</del> KGLDPY |
| 137 | E5K <del>W</del> G9 | 94  | VGSL <del>L</del> KEVHEN |
| 138 | E5K <del>W</del> G9 | 126 | FPSAE <del>K</del> LGKVS |
| 139 | E5K <del>W</del> G9 | 168 | GIDYS <del>K</del> RMTNL |
| 140 | B6A879              | 210 | GDIGN <del>K</del> SKKVQ |
| 141 | B6A879              | 298 | HAMGH <del>K</del> LDLAF |
| 142 | B6A879              | 402 | SGVKA <del>K</del> LKKS  |
| 143 | B6A879              | 565 | TPRTV <del>K</del> QKGEY |
| 144 | Q9L5X8              | 22  | HVDHG <del>K</del> TTLVD |
| 145 | Q9L5X8              | 165 | DQLDF <del>K</del> VVYAS |
| 146 | Q9L5X8              | 236 | TRGSV <del>K</del> ANQQV |
| 147 | Q9L5X8              | 359 | TDDPD <del>K</del> FRVSG |
| 148 | D0ZRV8              | 76  | IETLQ <del>K</del> SIDNE |
| 149 | Q6NEZ3              | 90  | FDALI <del>K</del> IKDIS |
| 150 | Q6NEZ3              | 280 | DTSGS <del>K</del> TITAR |
| 151 | Q6NEZ3              | 312 | ELDT <del>K</del> KPEDTD |
| 152 | Q6NEZ3              | 408 | KNESK <del>K</del> PNESY |



|     |        |     |              |
|-----|--------|-----|--------------|
| 153 | Q9UKV3 | 41  | EGRWRKLPKMP  |
| 154 | Q9UKV3 | 81  | RVTDLKAALEQ  |
| 155 | Q9UKV3 | 113 | LENLQKHSTPH  |
| 156 | Q9UKV3 | 138 | QNSFIKQYLEK  |
| 157 | Q9UKV3 | 220 | DSDDDEKPRKGE |
| 158 | Q9UKV3 | 349 | QEEARKSHLAR  |
| 159 | P18281 | 23  | AETVDKSAPQI  |
| 160 | Q9SJU4 | 358 | KEENVKAAQDI  |
| 161 | Q9SJU4 | 369 | LLARAKANSLA  |
| 162 | Q9SJU4 | 389 | ESEEAKEGMFV  |
| 163 | Q9ZU52 | 53  | LVKTAKSIASP  |
| 164 | Q9ZU52 | 273 | AEHKNKASPET  |
| 165 | Q9ZU52 | 345 | RTWQGKPEKIE  |
| 166 | Q9ZU52 | 354 | IEASQKALLVR  |
| 167 | Q9ZU52 | 361 | LLVRAKANSLA  |
| 168 | P62157 | 78  | MARKMKDSE    |
| 169 | P04573 | 50  | GQTYTKRETEA  |
| 170 | P04573 | 156 | LIKKSKNALKE  |
| 171 | P00889 | 107 | QKMLPKAKGGE  |
| 172 | P00889 | 321 | QKEVGKDVSD   |
| 173 | P00044 | 60  | TDANIKKNVLW  |
| 174 | P00044 | 61  | DANIKKNVLWD  |
| 175 | P00078 | 22  | GEKLFKGRAAQ  |
| 176 | P00077 | 61  | GFAYSKANADS  |
| 177 | P00043 | 96  | GLKKAADRNDL  |
| 178 | P00070 | 64  | AGNKNKAVIWE  |
| 179 | P00047 | 61  | YTDANKQAGIT  |
| 180 | Q71V39 | 215 | WFKGWKVERKE  |
| 181 | P02993 | 222 | ERKEGKADGKT  |
| 182 | P02994 | 84  | KFETPKYQVTV  |
| 183 | Q96KQ7 | 28  | ALLLEKETRGA  |
| 184 | Q96KQ7 | 200 | PPVPEKRPPEI  |
| 185 | Q96KQ7 | 219 | VHSLGKVTSDL  |
| 186 | Q96KQ7 | 226 | TSDLAKRRKLN  |
| 187 | P53991 | 169 | KEDPAKGLCS   |
| 188 | P53991 | 194 | TGPTGKVLLLP  |
| 189 | P10587 | 50  | EAASIKEEKGD  |
| 190 | P10587 | 66  | LQENGGKVTLS  |
| 191 | P10587 | 77  | KDDIQKMNPPK  |
| 192 | P10587 | 136 | PIYSEKIIDMY  |
| 193 | P11416 | 193 | IEKVRKAHQET  |
| 194 | P11416 | 238 | TKCIIKTVEFA  |
| 195 | P27064 | 21  | GVKDYKLTYYT  |
| 196 | P27064 | 128 | NVFGFKALRAL  |
| 197 | P04717 | 81  | SLDRYKGRCE   |
| 198 | P04717 | 316 | FRVLAKALRLS  |
| 199 | P04992 | 305 | VIDRQKNHGIH  |
| 200 | P0A7J7 | 45  | KAFNAKTDSIE  |
| 201 | P0A7J7 | 82  | AVLLKKAAGIK  |
| 202 | Q5SLP6 | 80  | SYLIRKAAGLE  |
| 203 | Q5SLP6 | 111 | EIAKQKMPDLN  |
| 204 | P0CX53 | 54  | ATKEFKGIKVT  |

|     |        |     |             |
|-----|--------|-----|-------------|
| 205 | P0CX53 | 63  | VTVQLKIQNRQ |
| 206 | P62986 | 63  | DYNIQKESTLH |
| 207 | P62986 | 113 | VNCRKKKCGHT |
| 208 | P55072 | 63  | LLKGKKRREAV |
| 209 | P55072 | 81  | TCSDEKIRMNR |
| 210 | P55072 | 164 | RAVEFKVVETD |
| 211 | P55072 | 277 | PEIMSKLAGES |
| 212 | P55072 | 288 | ESNLRKAFEEA |
| 213 | P05547 | 20  | DDIDRKKAEVR |
| 214 | P05547 | 55  | RLLLRKKAEE  |
| 215 | P05547 | 99  | LRAIKEYFDH  |
| 216 | O95785 | 341 | EIQKLKQVPGD |
| 217 | O95785 | 743 | SAEEVKAIERR |

**(5) Subset 5 (216 samples)**

| Sample # | Protein ID | Site | Sequences   |
|----------|------------|------|-------------|
| 1        | Q9Y232     | 27   | EGPTQKFLFKR |
| 2        | Q9Y232     | 84   | YLVRWKGYDSE |
| 3        | Q9Y232     | 118  | HTEKQKESTLT |
| 4        | Q9Y232     | 185  | SLSSRKNMDLA |
| 5        | P00042     | 10   | KKGSEKKGATL |
| 6        | P26358     | 88   | KSLLNKDLSE  |
| 7        | P26358     | 194  | SDESIKEEDKD |
| 8        | O75530     | 20   | MPAAKKQKLSS |
| 9        | O75530     | 79   | KSKKCKYSFKC |
| 10       | O75530     | 83   | CKYSFKCVNSL |
| 11       | O75530     | 275  | MMNAIKESYDY |
| 12       | Q5VTE0     | 30   | GHLIYKCGGID |
| 13       | Q5VTE0     | 62   | AWVLDKKAER  |
| 14       | P0CE47     | 188  | AEWEAKILELA |
| 15       | P0CE47     | 264  | VEMFRKLLDEG |
| 16       | O75367     | 73   | ARDNKKGRVTP |
| 17       | P62807     | 21   | KKAVTKAQKKD |
| 18       | P62807     | 28   | QKKGDKKRKRS |
| 19       | P61830     | 116  | AAIHAKRVTIQ |
| 20       | P61830     | 122  | RVTIQKDKIKL |
| 21       | P62803     | 9    | RGKGGKGLGKG |
| 22       | P62803     | 45   | RRGGVKRISGL |
| 23       | P04637     | 120  | HSGTAKSVTCT |
| 24       | P04637     | 351  | EALELKDAQAG |
| 25       | Q86L05     | 38   | LQINLKNYDTK |
| 26       | Q86L05     | 44   | NYDTKKDKRFS |
| 27       | Q86L05     | 59   | IGTVTKPKLSV |
| 28       | Q86L05     | 91   | IEALKKIGPKN |
| 29       | Q86L05     | 101  | NKKAIKLSKK  |
| 30       | Q86L05     | 106  | KKLSKKYDAFL |
| 31       | Q7M1B9     | 20   | KVLKSKTPVVV |
| 32       | Q7M1B9     | 44   | APILDKLAGFY |
| 33       | Q7M1B9     | 82   | TLVIFKDGREV |

|    |        |     |              |
|----|--------|-----|--------------|
| 34 | P80322 | 104 | FRVLDKNGDGF  |
| 35 | P80322 | 112 | DGFIDKDEFRA  |
| 36 | P14909 | 23  | TLLYKEIARN   |
| 37 | P14909 | 172 | ISKRTKMIVFN  |
| 38 | P14909 | 302 | VSLFKKRRDVM  |
| 39 | P22498 | 124 | DEYANKDALNH  |
| 40 | P22498 | 328 | TRTVVKRTEKG  |
| 41 | P22498 | 451 | VDYNTKRLYWR  |
| 42 | P0C835 | 11  | KAVKVKTPAGK  |
| 43 | P0C835 | 24  | ELVPEKVVWALA |
| 44 | P80053 | 117 | VRVDPKKL TRE |
| 45 | P80053 | 166 | LDEYIKITGKV  |
| 46 | P13123 | 19  | EVDTSKIKKVW  |
| 47 | P61991 | 9   | VKFKYKGEEKQ  |
| 48 | P61991 | 22  | ISKIKKVWRVG  |
| 49 | P13125 | 9   | VRFKYKGEEKE  |
| 50 | P13125 | 52  | EKDAPKELMDM  |
| 51 | P39476 | 19  | EVDISKIKKVW  |
| 52 | P26358 | 257 | PTPKQKLKEEP  |
| 53 | O75530 | 342 | EDDIDKIKPSE  |
| 54 | O75530 | 408 | TLTHHKCGAAI  |
| 55 | Q5VTE0 | 290 | VTTEVKSVMH   |
| 56 | Q5VTE0 | 313 | VGFKVKNVSVK  |
| 57 | Q5VTE0 | 330 | VAGDSKNDPPM  |
| 58 | Q5VTE0 | 386 | RRSGKKLEDGP  |
| 59 | P49949 | 74  | PASEKKADPIN  |
| 60 | O43524 | 663 | NFTGAKQASSQ  |
| 61 | Q08369 | 245 | CGLYHKMNGIN  |
| 62 | Q08369 | 366 | EMRPIKTEPGL  |
| 63 | P16403 | 64  | LAALKKALAAA  |
| 64 | P16403 | 106 | ASGSFKLNKKA  |
| 65 | P16403 | 119 | GEAKPKVKKAG  |
| 66 | P16403 | 140 | AKKPKKAAGGA  |
| 67 | P10412 | 21  | EKTPVKKKARK  |
| 68 | P10412 | 119 | GEAKPKAKKAG  |
| 69 | P10412 | 122 | KPKAKKAGAAK  |
| 70 | P16401 | 17  | PAPVEKSPAKK  |
| 71 | P16401 | 149 | KAAGAKKAVKK  |
| 72 | P16401 | 153 | AKKAVKKT PPK |
| 73 | O75367 | 161 | RKSKKKQGEVS  |
| 74 | O75367 | 167 | QGEVSKAASAD  |
| 75 | P40283 | 8   | PKAEKKPAEKK  |
| 76 | P40283 | 18  | KPASEKPVEEK  |
| 77 | P40283 | 39  | KPKAGKLPKE   |
| 78 | P40283 | 54  | GDKKKKMKKKS  |
| 79 | P40283 | 64  | SVETYKIYIFK  |
| 80 | P40283 | 72  | IFKVLKQVHPD  |
| 81 | P40283 | 105 | AQEASKLARYN  |
| 82 | O14979 | 221 | KLIDPKRAKAL  |
| 83 | O14979 | 234 | KEPPKVFVGG   |
| 84 | Q14103 | 72  | KIDASKNEEDE  |
| 85 | Q14103 | 110 | SWDTTKDLKD   |

|     |        |     |                       |
|-----|--------|-----|-----------------------|
| 86  | Q14103 | 170 | KVIDP <b>K</b> RAKAM  |
| 87  | Q14103 | 182 | TKEPV <b>K</b> KIFVG  |
| 88  | Q14103 | 197 | DTPEEK <b>I</b> REYF  |
| 89  | Q14103 | 221 | DNKTN <b>K</b> RRGFC  |
| 90  | Q14103 | 237 | EEEPV <b>K</b> KIMEK  |
| 91  | Q14103 | 243 | KIMEK <b>K</b> YHNVG  |
| 92  | Q14103 | 251 | NVGLS <b>K</b> CEIKV  |
| 93  | P16862 | 275 | RCMEF <b>K</b> KREGR  |
| 94  | P16862 | 369 | LDRIC <b>K</b> AIDYV  |
| 95  | P16862 | 529 | NKIVR <b>K</b> PLMES  |
| 96  | P16862 | 583 | EPKLP <b>K</b> DKRLK  |
| 97  | O00159 | 151 | KTEAT <b>K</b> RLLQF  |
| 98  | O00159 | 224 | SYLLE <b>K</b> SRVVH  |
| 99  | O00159 | 336 | TENQL <b>K</b> YLTRL  |
| 100 | O00159 | 404 | RSLAS <b>K</b> DVESP  |
| 101 | O00159 | 477 | QYFNN <b>K</b> IICDL  |
| 102 | O00159 | 571 | LFRNL <b>K</b> ETMCS  |
| 103 | P13538 | 23  | LRKSE <b>K</b> ERIEA  |
| 104 | P13538 | 108 | VLYNL <b>K</b> ERYAA  |
| 105 | P13538 | 214 | EEQSG <b>K</b> MOGTL  |
| 106 | Q96RI1 | 188 | MYMRR <b>K</b> CQECR  |
| 107 | Q96RI1 | 227 | LRKNV <b>K</b> QHADQ  |
| 108 | Q96RI1 | 317 | LVEFT <b>K</b> KLPGF  |
| 109 | Q96RI1 | 318 | VEFT <b>K</b> KLPGFQ  |
| 110 | P11940 | 196 | TNVYI <b>K</b> NFGED  |
| 111 | P11940 | 259 | KELNG <b>K</b> QIYVG  |
| 112 | P11940 | 324 | TITSA <b>K</b> VMMEG  |
| 113 | P11940 | 361 | RIVAT <b>K</b> PLYVA  |
| 114 | P06400 | 63  | TALCQ <b>K</b> LKIPD  |
| 115 | P06400 | 95  | GYIQ <b>K</b> KELWG   |
| 116 | P06400 | 153 | MSRLL <b>K</b> KYDVL  |
| 117 | P06400 | 265 | SARIA <b>K</b> QLEND  |
| 118 | P06400 | 329 | IYLKN <b>K</b> DL DAR |
| 119 | P06400 | 412 | CTVNP <b>K</b> ESILK  |
| 120 | P06400 | 462 | MESML <b>K</b> SEEER  |
| 121 | P0CX43 | 78  | DVDRA <b>K</b> SCGVD  |
| 122 | P0CX43 | 95  | LKKLN <b>K</b> NKKLI  |
| 123 | P0CX43 | 118 | SEVL <b>I</b> KQV PRL |
| 124 | P0CX43 | 156 | VRST <b>I</b> KFQLKK  |
| 125 | P47914 | 52  | KKHN <b>K</b> KGLKKM  |
| 126 | P47914 | 56  | KKGL <b>K</b> KMQANN  |
| 127 | P47914 | 77  | IKALV <b>K</b> PKEVK  |
| 128 | P47914 | 134 | AKDOT <b>K</b> AQAAA  |
| 129 | Q969Q0 | 98  | LGGDK <b>K</b> RRKGQV |
| 130 | P0CX27 | 24  | KHTQH <b>K</b> VTOYK  |
| 131 | P0CX27 | 46  | RRYDR <b>K</b> QSGFG  |
| 132 | P0CX27 | 60  | KPVF <b>H</b> KAKTT   |
| 133 | P02393 | 66  | FDVIL <b>K</b> AAGAN  |
| 134 | P02393 | 115 | AEEAK <b>K</b> Q LVEA |
| 135 | P0A7K2 | 108 | DAEAL <b>K</b> KALEE  |
| 136 | P07472 | 67  | TSAGE <b>K</b> KVNVI  |
| 137 | P07472 | 73  | KVNVI <b>K</b> VVREI  |

|     |        |     |                      |
|-----|--------|-----|----------------------|
| 138 | Q12962 | 108 | ANGDV <b>K</b> PVVSS |
| 139 | Q12962 | 177 | QHCKM <b>K</b> GTASG |
| 140 | Q04207 | 79  | ISLV <b>T</b> KDPPHR |
| 141 | Q53688 | 66  | ELGGE <b>K</b> EYRRL |
| 142 | Q53688 | 176 | YDTLQ <b>K</b> QNYTL |
| 143 | Q53688 | 362 | VKECD <b>K</b> TNEIE |
| 144 | Q53688 | 371 | IEEAT <b>K</b> RNPEA |
| 145 | Q53688 | 445 | STHDT <b>K</b> FSEDV |
| 146 | E5KVG9 | 129 | AEKLG <b>K</b> VSELV |
| 147 | B6A879 | 43  | VIFDG <b>K</b> VYTNT |
| 148 | B6A879 | 531 | SLSMG <b>K</b> NGFVL |
| 149 | Q9L5X8 | 431 | RKGEL <b>K</b> DMAPD |
| 150 | D0ZRV8 | 19  | KVNRN <b>K</b> VPTPM |
| 151 | Q6NEZ3 | 123 | VGKNV <b>K</b> LDGNQ |
| 152 | Q6NEZ3 | 352 | SLLPN <b>K</b> APIRV |
| 153 | Q6NEZ3 | 455 | QMGVY <b>K</b> YSNSL |
| 154 | D1BQI7 | 90  | MASIV <b>K</b> ALSrk |
| 155 | Q9UKV3 | 95  | AKSGQ <b>K</b> SALVK |
| 156 | Q9UKV3 | 268 | ADRNL <b>K</b> TEEEE |
| 157 | Q9UKV3 | 302 | EAPIL <b>K</b> EFKEE |
| 158 | Q9UKV3 | 325 | MDERP <b>K</b> TRSQE |
| 159 | Q9SJU4 | 293 | ASYTL <b>K</b> LLRNR |
| 160 | Q9ZU52 | 8   | SASFV <b>K</b> PNTLS |
| 161 | Q9ZU52 | 370 | LAQLG <b>K</b> YSAEG |
| 162 | Q9ZU52 | 382 | NEDAK <b>K</b> GMFVK |
| 163 | P62157 | 76  | TMMAR <b>K</b> MKDTD |
| 164 | P04573 | 64  | EARGP <b>K</b> GDKKN |
| 165 | P04573 | 154 | MDLIK <b>K</b> SKNAL |
| 166 | P00889 | 43  | ADLIP <b>K</b> EQARI |
| 167 | P00889 | 103 | IPECQ <b>K</b> MLPKA |
| 168 | P00889 | 352 | HAVLR <b>K</b> TDPRY |
| 169 | P00889 | 450 | PLERP <b>K</b> SMSTD |
| 170 | P00063 | 61  | YSAAN <b>K</b> NMAVN |
| 171 | P00078 | 84  | LENPK <b>K</b> FMPGT |
| 172 | P00078 | 90  | FMPGT <b>K</b> MSFAG |
| 173 | P00043 | 18  | GANLF <b>K</b> TRCLQ |
| 174 | P00047 | 19  | GANLF <b>K</b> TRCAQ |
| 175 | P00047 | 81  | LENPK <b>K</b> FIPGT |
| 176 | Q71V39 | 84  | KFETT <b>K</b> YYITI |
| 177 | Q71V39 | 172 | YDEIV <b>K</b> EVSAy |
| 178 | P02994 | 51  | AAELG <b>K</b> GsfKY |
| 179 | P02994 | 159 | KMDSV <b>K</b> WDESR |
| 180 | Q96KQ7 | 131 | CPSRA <b>K</b> MSMTG |
| 181 | P53991 | 122 | TKINS <b>K</b> GKEVP |
| 182 | P53991 | 291 | MYIQD <b>K</b> VEEYA |
| 183 | P53991 | 315 | YFCGL <b>K</b> GMPG  |
| 184 | P07041 | 123 | VTIQS <b>K</b> DIQLA |
| 185 | P10587 | 53  | SIKEE <b>K</b> GDEVT |
| 186 | P10587 | 144 | DMYKG <b>K</b> KRHEM |
| 187 | P10587 | 188 | KTENT <b>K</b> KVIQY |
| 188 | P10587 | 204 | SSHKG <b>K</b> KDTSI |
| 189 | P10587 | 205 | SHKG <b>K</b> KDTSIT |

|     |        |     |              |
|-----|--------|-----|--------------|
| 190 | P11416 | 262 | QITLLKAACLD  |
| 191 | P11416 | 365 | KVYVRKRRPSR  |
| 192 | P27064 | 32  | PEYETKDTDIL  |
| 193 | P27064 | 201 | GLDFTKDDENV  |
| 194 | P27064 | 252 | CEEMMKRAIFA  |
| 195 | P04717 | 32  | PDYQTKDTDIL  |
| 196 | P04717 | 450 | IREACKWSPPEL |
| 197 | P04992 | 81  | SLDRYKGHRYR  |
| 198 | P0A7J7 | 10  | VQAYVKLQVAA  |
| 199 | P0A7J7 | 51  | TDSIEKGLPIP  |
| 200 | P0A7J7 | 100 | KDKVGKISRAQ  |
| 201 | P0CX53 | 40  | LGLSPKKGED   |
| 202 | P0CX53 | 86  | VITALKEPPRD  |
| 203 | P55072 | 217 | QLAQIKEMVEL  |
| 204 | P05547 | 35  | EQSLKKQKKG   |
| 205 | P05547 | 37  | SLKKQKKGFM   |
| 206 | P05547 | 38  | LKKQKKGFMTP  |
| 207 | P05547 | 47  | TPERKKKLRL   |
| 208 | P05547 | 48  | PERKKKLRL    |
| 209 | P05547 | 74  | AGERRKIIDQR  |
| 210 | P05547 | 112 | QIESDKYDVEL  |
| 211 | P05547 | 122 | LEIIRKDYEIN  |
| 212 | P05547 | 139 | NDLRGKFIKPT  |
| 213 | O95785 | 279 | IYFKQKEHLL   |
| 214 | O95785 | 332 | QASREKIIIEE  |
| 215 | O95785 | 357 | RLQCPKCVFG   |
| 216 | O95785 | 756 | FQKKKKVANS   |

**(6) Subset 6 (217 samples)**

| Sample # | Protein ID | Site | Sequences   |
|----------|------------|------|-------------|
| 1        | P05141     | 23   | AAAIKSTAVAP |
| 2        | Q9Y232     | 31   | QKLFLKRNNS  |
| 3        | Q9Y232     | 69   | ERIVDKRKNK  |
| 4        | Q9Y232     | 71   | IVDKRKNKKG  |
| 5        | Q9Y232     | 147  | NSNFSKTSPK  |
| 6        | Q9Y232     | 151  | SKTSPKALVIG |
| 7        | Q9Y232     | 175  | SQKFRKNTAPS |
| 8        | Q9Y232     | 191  | NMDLAKSGIK  |
| 9        | Q9Y232     | 200  | KILVPKSPVKS |
| 10       | P26358     | 39   | DSLTEKECVKE |
| 11       | O75530     | 76   | GKWKSKCKYS  |
| 12       | O75530     | 106  | FNWHSKEGDPL |
| 13       | Q5VTE0     | 212  | NMPWFKGWKVT |
| 14       | Q5VTE0     | 244  | TRPTDKPLRLP |
| 15       | P0CE47     | 90   | HADYVKNMITG |
| 16       | P0CE47     | 177  | RGSALKALEGD |
| 17       | P0CE47     | 358  | PGDNIKMVVTL |
| 18       | O75367     | 12   | KKKSTKTSRSA |
| 19       | O75367     | 116  | PELLAKKRGSK |

|    |        |     |              |
|----|--------|-----|--------------|
| 20 | O75367 | 134 | TPPPAKKAKSP  |
| 21 | O75367 | 148 | KPVSKKAGGKK  |
| 22 | P62807 | 25  | TKAQKKGKKR   |
| 23 | P62807 | 44  | SVYVYKVLKQV  |
| 24 | P62807 | 117 | VSEGTKAVTKY  |
| 25 | P62807 | 121 | TKAVTKYTSSK  |
| 26 | P62803 | 6   | MSGRGKGGKGL  |
| 27 | P62803 | 17  | GKGGAKRHRKV  |
| 28 | P04637 | 291 | EENLRKKGEPH  |
| 29 | P04637 | 292 | ENLRKKGEPHH  |
| 30 | Q86L05 | 98  | GPKNKKAIKKL  |
| 31 | Q86L05 | 130 | GPGLNKVGKFP  |
| 32 | Q7M1B9 | 15  | SDFAEKVLKSK  |
| 33 | P14909 | 33  | NVEKTKKIKII  |
| 34 | P14909 | 95  | GTDVKKEEVIV  |
| 35 | P14909 | 193 | SPNDVKKIVDI  |
| 36 | P14909 | 220 | FVYEGKMRSTL  |
| 37 | P14909 | 337 | VSKILKTSGFD  |
| 38 | P14909 | 344 | SGFDVKSLAIK  |
| 39 | P39462 | 24  | GVPKPKGPQVL  |
| 40 | P39462 | 86  | VVGYSKGD LVA |
| 41 | P39462 | 252 | LNNSEKTL SVY |
| 42 | P39462 | 266 | LAKQGKYVMVG  |
| 43 | P22498 | 304 | TRGNEKIVRDD  |
| 44 | P22498 | 374 | YDVLTKYWNRY  |
| 45 | Q9Y232 | 219 | SESPEKLDPVE  |
| 46 | Q9Y232 | 284 | LAVNGKGTSPF  |
| 47 | P0C835 | 34  | APKGRKGVKIG  |
| 48 | P80053 | 56  | SDGKCLKTFMGW |
| 49 | P80053 | 118 | RVDPKCLTREE  |
| 50 | P80053 | 130 | EQLSRKYIQAI  |
| 51 | P80053 | 279 | YPEGRKVTNEE  |
| 52 | P80053 | 309 | KFNAPKVKAKL  |
| 53 | P80053 | 311 | NAPKVKAKLIV  |
| 54 | P80053 | 360 | EWANNKMGEII  |
| 55 | P80053 | 371 | SDEEAKKLIVD  |
| 56 | P13123 | 28  | VWRVGMVSFT   |
| 57 | P61991 | 19  | QVDISKIKKVV  |
| 58 | P61991 | 28  | VWRVGMISFT   |
| 59 | Q5VTE0 | 311 | DNVGFVKNV S  |
| 60 | P55907 | 21  | EHSGHKVYGPV  |
| 61 | O43524 | 606 | VMGHEKFPSDL  |
| 62 | Q08369 | 255 | NRPLIKPQRRL  |
| 63 | Q08369 | 322 | RKRKPKNLNKS  |
| 64 | Q08369 | 421 | SQASSKQDSWN  |
| 65 | P16403 | 52  | AVAASKERSGV  |
| 66 | P16403 | 81  | NNSRIKLG LKS |
| 67 | P16403 | 90  | KSLVSKGTLVQ  |
| 68 | P16403 | 149 | GATPKKSAKKT  |
| 69 | P16403 | 153 | KKSAKTPKKA   |
| 70 | P10412 | 137 | AGAAKPKKAT   |
| 71 | P10412 | 140 | AKKPKKATGAA  |

|     |        |     |                     |
|-----|--------|-----|---------------------|
| 72  | P10412 | 149 | AATPKKSAKKT         |
| 73  | P16401 | 140 | AGATPKKAKKA         |
| 74  | P16401 | 144 | PKKAKKAAGAK         |
| 75  | P16401 | 157 | VKKTPKKAKKP         |
| 76  | O75367 | 159 | GARKSKKKQGE         |
| 77  | P40283 | 7   | APKAEKKPAEK         |
| 78  | P40283 | 23  | KPVEEKSKAEK         |
| 79  | P40283 | 25  | VEEKSKAEKAP         |
| 80  | P40283 | 28  | KSKAEKAPA EK        |
| 81  | O14979 | 216 | HKLDGK LIDPK        |
| 82  | O14979 | 233 | GKEPPK KVFVG        |
| 83  | O14979 | 289 | E E P V K L L E S R |
| 84  | Q14103 | 173 | DPKRAKAMKTK         |
| 85  | P16862 | 83  | LNSITKTQDWR         |
| 86  | P16862 | 415 | IFIPEK PATSS        |
| 87  | P16862 | 580 | DHNEPKLPKDK         |
| 88  | P16862 | 641 | RSLNWKDMLGW         |
| 89  | O00159 | 200 | SSRFGKYMDVQ         |
| 90  | O00159 | 269 | YLYLVKGQCAK         |
| 91  | O00159 | 357 | ALTHRKIIAKG         |
| 92  | O00159 | 396 | TWLVGKINRSL         |
| 93  | O00159 | 512 | LTFLEKLEDTV         |
| 94  | O00159 | 632 | KPNDAKQPGRF         |
| 95  | P13538 | 20  | APYLRKSEKER         |
| 96  | P13538 | 60  | SKEGGKVTVKT         |
| 97  | P13538 | 64  | GKVTVKTEGGE         |
| 98  | P13538 | 74  | ETLTVKEDQVF         |
| 99  | P13538 | 191 | KTVNTRVIOY          |
| 100 | P13538 | 237 | AFGNAKTVRND         |
| 101 | P13538 | 249 | SSRFGKFIRIH         |
| 102 | P13538 | 368 | GNLKFKQKQRE         |
| 103 | Q96RI1 | 286 | QEITNKILKEE         |
| 104 | Q96RI1 | 352 | AEIFNKKLPSG         |
| 105 | Q96RI1 | 431 | LDVLQK LCKIH        |
| 106 | P11940 | 78  | NFDVIK GKPVR        |
| 107 | P11940 | 95  | DPSLRKSGVGN         |
| 108 | P11940 | 138 | DENGSKYGFV          |
| 109 | P11940 | 268 | VGRAQK KVERQ        |
| 110 | P11940 | 269 | GRAQK KVERQT        |
| 111 | P06400 | 96  | YIQKKKELWGI         |
| 112 | P06400 | 136 | FFNLLKEIDTS         |
| 113 | P06400 | 202 | TFLLAKEVLQ          |
| 114 | P06400 | 289 | NIDEVKNVYFK         |
| 115 | P06400 | 294 | KNVYFKNFIPF         |
| 116 | P06400 | 359 | QRTPRKSNLDE         |
| 117 | Q86L05 | 161 | KFQLK KVLCLA        |
| 118 | Q86L05 | 202 | GWQNIKTLYVK         |
| 119 | P0CX43 | 14  | VREHVKELLKY         |
| 120 | P0CX43 | 207 | GSLVVKSSMGP         |
| 121 | P47914 | 38  | KGVDPKFLRNM         |
| 122 | P47914 | 82  | KPKEVKPKIPK         |
| 123 | P47914 | 103 | YIAHPKLGKRA         |



|     |        |     |              |
|-----|--------|-----|--------------|
| 124 | P47914 | 122 | RLCRPKAKAKA  |
| 125 | Q969Q0 | 28  | VTQYKKGKDSL  |
| 126 | P0CX27 | 61  | PVFHKKAKTTK  |
| 127 | P0CX27 | 67  | AKTTKKVVLRL  |
| 128 | P0CX27 | 97  | ELGGEKKQKGQ  |
| 129 | P02393 | 58  | PAEEEEKTEFDV |
| 130 | P0A7K2 | 52  | EAAEEKTEFDV  |
| 131 | P0A7K2 | 85  | GLKEAKDLVES  |
| 132 | P07472 | 112 | DEAKTKLEEAG  |
| 133 | Q04207 | 28  | IIEQPKQGM    |
| 134 | Q04207 | 303 | IEEKRKRTYET  |
| 135 | Q53688 | 147 | LLKIVKDGDEY  |
| 136 | Q53688 | 158 | FLEYFKWKLPL  |
| 137 | Q53688 | 160 | EYFKWKLPLTE  |
| 138 | Q53688 | 248 | LRSIINKKIII  |
| 139 | Q53688 | 358 | ANQIVKECDKT  |
| 140 | Q53688 | 390 | PAVYAKAYEDT  |
| 141 | E5KWG9 | 191 | GVFEEKGVRAI  |
| 142 | E5KWG9 | 211 | SEELLKFCERS  |
| 143 | E5KWG9 | 229 | SWDSPKINRFT  |
| 144 | B6A879 | 121 | PDVNFKEDGSQ  |
| 145 | B6A879 | 291 | RELQKKAHAMG  |
| 146 | B6A879 | 445 | NLYSPKDPGEQ  |
| 147 | Q9L5X8 | 28  | TTLVDKLLQOS  |
| 148 | Q9L5X8 | 480 | HYGPHKGGNIG  |
| 149 | Q9L5X8 | 499 | ANAAGKALTNA  |
| 150 | Q6NC90 | 132 | RLKPLKPGKGF  |
| 151 | Q6NC90 | 135 | PLKPGKGFGEI  |
| 152 | D0ZRV8 | 36  | RLRVRKYRDPQ  |
| 153 | D0ZRV8 | 53  | LPESLKALLAY  |
| 154 | D0ZRV8 | 190 | HLPQWKAQOKM  |
| 155 | Q6NEZ3 | 145 | INDHLKASLEG  |
| 156 | Q9UKV3 | 213 | SISEEKGDSDD  |
| 157 | Q9UKV3 | 305 | ILKEFKEEGEE  |
| 158 | Q9SJU4 | 61  | LVKTAKTIASP  |
| 159 | Q9SJU4 | 186 | GARFAKWRTVV  |
| 160 | Q9SJU4 | 203 | SALAVKEAAWG  |
| 161 | Q9ZU52 | 288 | TLTMLKRRVPP  |
| 162 | P62157 | 31  | GTITTKELGTV  |
| 163 | P04573 | 14  | LGPEEKDECMK  |
| 164 | P00889 | 49  | EQARIKTFRQQ  |
| 165 | P00889 | 109 | MLPKAKGGEEP  |
| 166 | P00889 | 139 | VSWLSKEWAKR  |
| 167 | P00889 | 382 | VAQLYKIVPNV  |
| 168 | P00078 | 98  | FAGMKKPQERA  |
| 169 | P00043 | 61  | TDANKKKGVEW  |
| 170 | P00043 | 62  | DANKKKGVEWS  |
| 171 | P00070 | 31  | CHTVEKGAGHK  |
| 172 | P00070 | 96  | FPGLKQPQERA  |
| 173 | P00047 | 35  | QGGANKIGPNL  |
| 174 | P00047 | 47  | GLFGRKTGSVE  |
| 175 | Q71V39 | 212 | NMPWFKGWKVE  |

|     |        |     |             |
|-----|--------|-----|-------------|
| 176 | P02993 | 212 | RLPWYKGNIE  |
| 177 | P02994 | 210 | NAPWYKWEKE  |
| 178 | P02994 | 222 | KAGVVKGKTL  |
| 179 | Q96KQ7 | 341 | SSGRKAKKKW  |
| 180 | Q96KQ7 | 358 | VKPSRKRRKRE |
| 181 | P53991 | 38  | PVAATKASTAV |
| 182 | P53991 | 170 | EDPAKKGLCSN |
| 183 | P07041 | 116 | CAIHAKRVTIQ |
| 184 | P10587 | 11  | LSDDEKFLFVD |
| 185 | P10587 | 72  | KVTLKDDIQK  |
| 186 | P68696 | 91  | GVITVKTSKI  |
| 187 | P11416 | 86  | LPRIYKPCFVC |
| 188 | P11416 | 147 | YCRLQKCFDVG |
| 189 | P11416 | 164 | RNDRNKKKKEA |
| 190 | P27063 | 6   | PQTETKASVGF |
| 191 | P27064 | 81  | SLDRYKGRCYG |
| 192 | P27064 | 177 | CTIKPKLGLSA |
| 193 | P27064 | 183 | LGLSAKNYGRA |
| 194 | P27064 | 334 | GTVVVKLEGER |
| 195 | P27064 | 356 | DDFVEKDRSRG |
| 196 | P27064 | 450 | IREASKWSPEL |
| 197 | P04717 | 8   | PQTETKAKVGF |
| 198 | P04992 | 146 | PPAYVKTFQGP |
| 199 | P0A7J7 | 72  | FTFVTKTPPAA |
| 200 | Q5SLP6 | 90  | EKGAHKPGREK |
| 201 | P0CX53 | 31  | AALAPKIGPLG |
| 202 | P0CX53 | 93  | PPRDRKKDKNV |
| 203 | P0CX53 | 94  | PRDRKKDKNVK |
| 204 | P0CX53 | 119 | RQMRDKSFGRT |
| 205 | P0CX53 | 146 | CRVDFKNPHDI |
| 206 | P62986 | 6   | MQIFVKTLTGK |
| 207 | P55072 | 112 | DVKYGKRIHVL |
| 208 | P55072 | 148 | YRPIRKGDIFL |
| 209 | P55072 | 295 | FEEAEKNAPAI |
| 210 | P05547 | 12  | AEEAKKQDDI  |
| 211 | P05547 | 68  | KEQERKAGERR |
| 212 | P05547 | 84  | RCGQPKNLDGA |
| 213 | O95785 | 179 | VEDTPKTLDMA |
| 214 | O95785 | 385 | PGQTTKEPFGG |
| 215 | O95785 | 610 | AALELKQAFRE |
| 216 | O95785 | 641 | IVLVAKLGPQV |
| 217 | O95785 | 697 | PAMALKHEERK |

## (7) Subset 7 (217 samples)

| Sample # | Protein ID | Site | Sequences   |
|----------|------------|------|-------------|
| 1        | P05141     | 63   | VVRIPKEQGV  |
| 2        | P05141     | 147  | AADVGKAGAER |
| 3        | P05141     | 268  | RDEGGKAFK   |
| 4        | Q9Y232     | 76   | KNKKGKTEYLV |

|    |        |     |              |
|----|--------|-----|--------------|
| 5  | Q9Y232 | 195 | AKSGIKILVPK  |
| 6  | P00042 | 85  | YIPGTKMAFGG  |
| 7  | P00042 | 92  | AFGGLKKEKDR  |
| 8  | P26358 | 43  | EKECVKEKLN   |
| 9  | P26358 | 134 | PKPLSKPRTPR  |
| 10 | O75530 | 22  | AAKKQKLSSE   |
| 11 | O75530 | 74  | GKGKWKSKKCK  |
| 12 | O75530 | 211 | LLSVSKDHALR  |
| 13 | O75530 | 332 | AIVCWKPGKME  |
| 14 | Q5VTE0 | 44  | IEKFEKEAAEM  |
| 15 | Q5VTE0 | 64  | VLDKCLKAERER |
| 16 | P0CE47 | 25  | HVDHGKTTLTA  |
| 17 | P0CE47 | 295 | GQVLAKPGTIK  |
| 18 | O75367 | 9   | RGGKKKSTKTS  |
| 19 | O75367 | 34  | LRYIKKGHPKY  |
| 20 | O75367 | 72  | AARDNKGRVT   |
| 21 | O75367 | 135 | PPPAKKAKSPS  |
| 22 | P62807 | 6   | MPEPAKSAPAP  |
| 23 | P68432 | 116 | CAIHAKRVTIM  |
| 24 | P09988 | 116 | CAIHGKRVTIQ  |
| 25 | Q55BN9 | 65  | ELLIKKLFPQR  |
| 26 | P61830 | 57  | IRRFQKSTELL  |
| 27 | P61830 | 123 | VTIQKKDIKLA  |
| 28 | P62803 | 13  | GKGLGKGGAKR  |
| 29 | P04637 | 101 | SVPSQKTYQGS  |
| 30 | P04637 | 132 | SPALNKMFCQL  |
| 31 | P04637 | 321 | PQPKKKPLDGE  |
| 32 | Q86L05 | 18  | VSQLFKEAQES  |
| 33 | Q86L05 | 24  | EAQESKRGFLE  |
| 34 | Q86L05 | 102 | KKAIKKLSKKY  |
| 35 | P80322 | 44  | LGTIMKRLGMS  |
| 36 | P80322 | 153 | DYEEWKEIIQE  |
| 37 | P14909 | 166 | DDLQSKISKRT  |
| 38 | P14909 | 281 | TSFVQKAAVKA  |
| 39 | P14909 | 334 | FPNVSKILKTS  |
| 40 | P14909 | 349 | KSLAIKLIIEK  |
| 41 | P39462 | 31  | PQVLIKVEAAG  |
| 42 | P39462 | 61  | EDLGVKLPVTL  |
| 43 | P39462 | 172 | SLDPTKTLV    |
| 44 | P39462 | 192 | AVQIAKAVSGA  |
| 45 | P39462 | 320 | KPMITKTMKLE  |
| 46 | P39462 | 323 | ITKTMKLEEAN  |
| 47 | P22498 | 219 | GYVGVKSGFPP  |
| 48 | P22498 | 255 | IKSVSKKPVGI  |
| 49 | Q9Y232 | 388 | AADDSKLVLLS  |
| 50 | Q9Y232 | 417 | LTDDRKRESTK  |
| 51 | Q9Y232 | 422 | KRESTKMAEAI  |
| 52 | P0C835 | 37  | GRKGVKIGLFK  |
| 53 | P0C835 | 42  | KIGLFDKDPETG |
| 54 | P80053 | 202 | VATIAKEAANK  |
| 55 | P80053 | 239 | SEMGAKIVGVS  |
| 56 | P80053 | 247 | GVSDSKGGVIN  |

|     |        |     |             |
|-----|--------|-----|-------------|
| 57  | Q5VTE0 | 385 | DRRSGKKLEDG |
| 58  | P00219 | 10  | NYRTSKPVVGD |
| 59  | O43524 | 176 | ESSPDKRLTLS |
| 60  | O43524 | 197 | PYFKDKGDSNS |
| 61  | O43524 | 360 | SPSVSKPCTVE |
| 62  | P16403 | 17  | APPAEKAPVKK |
| 63  | P16403 | 22  | KAPVKKKAAKK |
| 64  | P16403 | 23  | APVKKKAAKKA |
| 65  | P16403 | 46  | SELITKAVAAS |
| 66  | P16403 | 85  | IKLGLKSLVSK |
| 67  | P16403 | 109 | SFKLNKKAASG |
| 68  | P16403 | 121 | AKPKVKKAGGT |
| 69  | P16403 | 137 | VGAAKPKKAA  |
| 70  | P16403 | 148 | GGATPKKSACK |
| 71  | P16403 | 157 | KKTPKAKKPA  |
| 72  | P10412 | 117 | ASGEAKPKAKK |
| 73  | P16401 | 55  | AVAASKERNGL |
| 74  | O75367 | 189 | TVLSTKSLFLG |
| 75  | P40283 | 12  | KKPAEKKPASE |
| 76  | P40283 | 34  | APAEEKPKAGK |
| 77  | P40283 | 51  | GAGGDKKKMK  |
| 78  | P40283 | 53  | GGDKKKMKKK  |
| 79  | P40283 | 56  | KKKKMKKSVE  |
| 80  | Q42681 | 64  | ELVIRKLPFOR |
| 81  | Q41811 | 13  | GKGLKGARKR  |
| 82  | O14979 | 180 | VDCTIKTDPVT |
| 83  | O14979 | 204 | AASVDKVLELK |
| 84  | O14979 | 227 | RAKALKGKEPP |
| 85  | O14979 | 229 | KALKGKEPPKK |
| 86  | O14979 | 306 | GKCEIKVAQPK |
| 87  | O14979 | 311 | KVAQPKVYRQ  |
| 88  | Q14103 | 114 | TKKDLKDYFSK |
| 89  | Q14103 | 161 | DQKEHKLNGKV |
| 90  | Q14103 | 165 | HKLNGKVIDPK |
| 91  | Q14103 | 238 | EEPVKKIMEKK |
| 92  | Q14103 | 260 | KVAMSKQYQQ  |
| 93  | P16862 | 25  | SVQSYKAAIDF |
| 94  | P16862 | 66  | LRPDEKINKNV |
| 95  | P16862 | 150 | NAVSTKPTPPP |
| 96  | P16862 | 168 | SGLSSKVHSYT |
| 97  | P16862 | 438 | HRSRGKRTTIV |
| 98  | O00159 | 146 | ESGAGKTEATK |
| 99  | O00159 | 188 | AFGNAKTLRND |
| 100 | O00159 | 209 | VQFDFKGPVVG |
| 101 | O00159 | 535 | DQRTRKSLGRG |
| 102 | O00159 | 594 | SELSDKKRPET |
| 103 | P13538 | 147 | LAYRGKQRQEA |
| 104 | P13538 | 148 | AYRGKQRQEAP |
| 105 | P13538 | 186 | ESGAGKTVNTK |
| 106 | P13538 | 296 | QIMSNKKPELI |
| 107 | P13538 | 349 | FSADEKTAIYK |
| 108 | Q96RI1 | 33  | EMMSMKPAKGV |

|     |        |     |              |
|-----|--------|-----|--------------|
| 109 | Q96RI1 | 120 | EMPVTKKPRMG  |
| 110 | Q96RI1 | 198 | RLRKCKEMGML  |
| 111 | Q96RI1 | 218 | TEIQCKSKRLR  |
| 112 | Q96RI1 | 256 | KSCREKTELTP  |
| 113 | Q96RI1 | 413 | DRQYIKDREAV  |
| 114 | Q96RI1 | 420 | REAVEKLQEPL  |
| 115 | P11940 | 177 | RFKSRKEREAE  |
| 116 | P11940 | 188 | LGARAKEFTNV  |
| 117 | P11940 | 208 | DDERLKDILFGK |
| 118 | P11940 | 279 | TELKRKFEQMK  |
| 119 | P11940 | 284 | KFEQMKQDRIT  |
| 120 | P06400 | 240 | LKEPYKTAVIP  |
| 121 | P06400 | 420 | ILKRVKDIGYI  |
| 122 | Q86L05 | 160 | VKFQLKKVLCL  |
| 123 | Q86L05 | 196 | VSLLLKQWQNI  |
| 124 | P0CX43 | 24  | YSNETKKRNFL  |
| 125 | P0CX43 | 25  | SNETKKRNFL   |
| 126 | P0CX43 | 101 | NKKLIKLSKK   |
| 127 | P0CX43 | 106 | KKLSKKYNAFI  |
| 128 | P0CX43 | 147 | DDLYGKVTDVR  |
| 129 | P0CX43 | 195 | FVSLLLKNWQNI |
| 130 | P47914 | 33  | RYESLKGVDPK  |
| 131 | P47914 | 51  | AKKHNNKGLKK  |
| 132 | P47914 | 79  | ALVKPKKVKPK  |
| 133 | P47914 | 84  | KEVKPKIPKGV  |
| 134 | Q969Q0 | 17  | CKKCGKHQPHK  |
| 135 | Q969Q0 | 61  | FRKKAKTTKKI  |
| 136 | P0CX27 | 15  | TYCKGKTCRKH  |
| 137 | P0CX27 | 86  | AQLTLKRCKHF  |
| 138 | P0CX27 | 100 | GEKKQKGOALQ  |
| 139 | P02393 | 107 | KEAVSKEEAEE  |
| 140 | P0A7K2 | 71  | KVAVIKAVRGA  |
| 141 | P0A7K2 | 101 | KEGVSKDDAEA  |
| 142 | P07472 | 68  | SAGEKKVNVIK  |
| 143 | P07472 | 87  | GLKEAKAAVDG  |
| 144 | Q12962 | 161 | SLAAQKFISDI  |
| 145 | Q04207 | 195 | NTAELKICRVN  |
| 146 | Q04207 | 218 | FLLCDKVQKED  |
| 147 | Q04207 | 314 | FKSIMKKSPFN  |
| 148 | Q53688 | 256 | IIIVEKILGFQ  |
| 149 | B6A879 | 107 | ILVEDKYTEET  |
| 150 | B6A879 | 212 | IGNKSKKVQEV  |
| 151 | B6A879 | 213 | GNKSKKVQEVW  |
| 152 | B6A879 | 567 | RTVKQKGEYAA  |
| 153 | B6A879 | 573 | GEYAAKNKLG   |
| 154 | Q9L5X8 | 8   | TPQIDKLRNIA  |
| 155 | Q9L5X8 | 543 | TVNALKGKQLT  |
| 156 | Q6NEZ3 | 41  | DTQAPKPVNTV  |
| 157 | Q6NEZ3 | 62  | AWGLYKFNQKS  |
| 158 | Q6NEZ3 | 226 | ESASIKQDVQI  |
| 159 | Q6NEZ3 | 332 | ATSLLKPAKVM  |
| 160 | Q9UKV3 | 44  | WRKLPKMPEAV  |

|     |        |     |              |
|-----|--------|-----|--------------|
| 161 | Q9UKV3 | 238 | QARAAKLSEGS  |
| 162 | Q9UKV3 | 294 | DDEGQKSREAP  |
| 163 | P18281 | 47  | LEEVAKPHELK  |
| 164 | Q9SJU4 | 82  | NATCGKRLASI  |
| 165 | Q9SJU4 | 147 | IVPGIKVDKGL  |
| 166 | Q9SJU4 | 268 | EGILLKPSMVT  |
| 167 | Q9SJU4 | 353 | KTWGGKEENVK  |
| 168 | Q9ZU52 | 50  | SDELVKTAKSI  |
| 169 | P11118 | 87  | TEEEIKEAFRV  |
| 170 | P00889 | 76  | GMRGMKGLVYE  |
| 171 | P00889 | 193 | GIHRTKYWELI  |
| 172 | P00889 | 215 | PCVAAKIYRNL  |
| 173 | P00063 | 19  | GEKIFKTKCAQ  |
| 174 | P00063 | 30  | CHTVDKGAGHK  |
| 175 | P00063 | 87  | YIPGTMVFPG   |
| 176 | P00077 | 16  | PGDAAKGEKIF  |
| 177 | P00043 | 12  | KGSEKKGANLF  |
| 178 | P00043 | 94  | FGGLKKAKDRN  |
| 179 | P00076 | 22  | CHSAQKGVNST  |
| 180 | P00076 | 52  | YSNANKNAAIV  |
| 181 | P00076 | 87  | AGIKAKKDRQD  |
| 182 | P00070 | 62  | YSAGNKNKAVI  |
| 183 | P00047 | 95  | FGGLKKNKDRN  |
| 184 | Q71V39 | 219 | WKVERKEGNAS  |
| 185 | P02993 | 44  | IEKFEKEAQEM  |
| 186 | P02993 | 51  | AQEMKGSFKY   |
| 187 | P02994 | 214 | YKGWEKETKAG  |
| 188 | P02994 | 224 | GVVKGKTLLEA  |
| 189 | Q96KQ7 | 343 | GRRKAKKKWRK  |
| 190 | Q96KQ7 | 345 | RKAKKKWRKDS  |
| 191 | Q96KQ7 | 368 | EPPRAKEPRGV  |
| 192 | P53991 | 6   | MASLRKPSNHA  |
| 193 | P53991 | 234 | NVPSYKFTGLF  |
| 194 | P53991 | 285 | NRKGGKMYIQD  |
| 195 | P10587 | 17  | FLFVDKNFVNN  |
| 196 | P10587 | 145 | MYKGGKRHEMP  |
| 197 | P10587 | 202 | VASSHKGK KDT |
| 198 | P11416 | 118 | RRSIQKNMVYT  |
| 199 | P11416 | 165 | NDRNKKKKEAP  |
| 200 | P11416 | 167 | RNKKKKKEAPKP |
| 201 | P27064 | 161 | QVERDKLNKYG  |
| 202 | P27064 | 305 | VIDRQKNHGMH  |
| 203 | P04717 | 227 | AEAIYKSOAET  |
| 204 | P04717 | 355 | RDDYIKKDRSR  |
| 205 | P04992 | 236 | ETGEIKGHYLK  |
| 206 | P04992 | 241 | KGHYLKATAGT  |
| 207 | P0A7J7 | 87  | KAAGIKSGSGK  |
| 208 | P0A7J7 | 95  | SGKPNKDKVGK  |
| 209 | P0CX53 | 130 | LASVTK EILGT |
| 210 | P62986 | 88  | RQLAQKYNCDK  |
| 211 | P55072 | 109 | PCPDVKYGKRI  |
| 212 | P05547 | 13  | EEAKKKQDDID  |

|     |        |     |                               |
|-----|--------|-----|-------------------------------|
| 213 | P05547 | 56  | LLLRK <b>K</b> AAEEL          |
| 214 | P05547 | 62  | AAEEL <b>K</b> KEQER          |
| 215 | O95785 | 550 | QLGRN <b>K</b> STVHP          |
| 216 | O95785 | 753 | RFSF <b>Q</b> KKKKV           |
| 217 | O95785 | 755 | SF <b>Q</b> KK <b>K</b> KKVAN |
