# Supplementary material for: iMethyl-PseAAC: Identification of Protein Methylation Sites via a Pseudo Amino Acid Composition Approach
Source: Hindawi journal article supplement (doi:10.1155/2014/947416), 2014-01-01
Supplement: f1 [file 947416.f1.zip]

**Online Supporting Information S5. Seven negative subsets for studying Arg-methylation.** Each subset contains 185 negative samples randomly taken from the 1,296 negative samples in [Online Supporting Information S3](#) except for the 6<sup>th</sup> subset, which contains 186 samples. None of the samples in one subset occurs in any other subset.

**(1) Subset 1 (185 samples)**

| Sample # | Protein ID | Site | Sequences    |
|----------|------------|------|--------------|
| 1        | Q9NR22     | 229  | VAIEDRQYKDF  |
| 2        | Q9UBL3     | 324  | LFSAQLRPPHG  |
| 3        | Q92934     | 72   | VEIRSRHSSYP  |
| 4        | Q7Q2B7     | 222  | IDLPERVDVII  |
| 5        | P11911     | 9    | GLEALRALPLL  |
| 6        | P11911     | 118  | CGTYLRVRNPV  |
| 7        | Q09472     | 86   | LSELLRSGSSP  |
| 8        | Q09472     | 354  | HKCQRREQANG  |
| 9        | Q09472     | 408  | WKNCTRHDPCV  |
| 10       | Q09472     | 580  | ITQDLRNHLVH  |
| 11       | Q09472     | 604  | ALKDRRMENLV  |
| 12       | Q09472     | 649  | LEEKRRTRLQK  |
| 13       | Q09472     | 1015 | TETEERSTELK  |
| 14       | Q09472     | 1076 | ESLPFRQPVDP  |
| 15       | Q09472     | 1324 | GEVTVRVVHAS  |
| 16       | Q09472     | 1410 | RPKCLRTAVYH  |
| 17       | Q09472     | 1462 | IPKPKRLQEWY  |
| 18       | P03372     | 28   | LEPLNRPQLKI  |
| 19       | P03372     | 158  | NSDNRROGGRE  |
| 20       | P03372     | 234  | IDKNRRKSCQA  |
| 21       | P03372     | 256  | MKGGIRKDRRG  |
| 22       | P03372     | 503  | QQQHQLAQLL   |
| 23       | P03372     | 515  | ILSHIRHMSNK  |
| 24       | Q01844     | 614  | GFGGRRGGPG   |
| 25       | Q01844     | 632  | EQMGGRRGGRG  |
| 26       | P22509     | 76   | GGGRGRGGGRG  |
| 27       | P22509     | 224  | VIEDARHPHKY  |
| 28       | P35637     | 213  | YGQQDRGGGRGR |
| 29       | P35637     | 269  | KFGGPRDQGSR  |
| 30       | P35637     | 274  | RDQGSRHDSEQ  |
| 31       | P35637     | 328  | NLYTDRETGKL  |
| 32       | P03347     | 299  | RDYVDRFYKTL  |
| 33       | P03347     | 305  | FYKTLRAEQAS  |
| 34       | P03347     | 429  | KDCTERQANFL  |
| 35       | P03347     | 452  | NFLQSRPEPTA  |
| 36       | P03347     | 502  | PLTSLRSLFGN  |
| 37       | P68431     | 54   | LREIRYQKST   |
| 38       | P68431     | 73   | FQRLVREIAQD  |
| 39       | P68431     | 117  | AIHAKRVTIMP  |
| 40       | P68431     | 130  | IQLARRIRGER  |
| 41       | P62805     | 24   | HRKVLRDNIQG  |

|    |        |     |              |
|----|--------|-----|--------------|
| 42 | P62805 | 68  | LENVIRDAVY   |
| 43 | P62805 | 96  | LKRQGRRTLYGF |
| 44 | P17096 | 84  | PGRKPRGRPKK  |
| 45 | P31942 | 19  | SDGTVRLRGLP  |
| 46 | P31942 | 21  | GTVRLRGLPFG  |
| 47 | P31942 | 105 | YDPPRRLLGQR  |
| 48 | P31942 | 222 | PLNPIRVHIDI  |
| 49 | O60506 | 303 | TAAQARRRLMS  |
| 50 | O60506 | 305 | AQARRRLMSGK  |
| 51 | O60506 | 446 | PPTRGRGRGGR  |
| 52 | Q07666 | 13  | AARMSRSSGRS  |
| 53 | Q07666 | 43  | PPLPHRSRGGG  |
| 54 | Q07666 | 291 | VPVRGRGAAPP  |
| 55 | Q07666 | 331 | GATVTRGVPPP  |
| 56 | P08199 | 394 | KVRAARTLLAK  |
| 57 | P08199 | 604 | RIVTDRETGSS  |
| 58 | O75925 | 63  | KELYRRRFPQK  |
| 59 | O75925 | 257 | ITSLVRLSTTV  |
| 60 | O75925 | 579 | LLHSSRFFPYT  |
| 61 | Q92804 | 101 | GSQGGRAPSYD  |
| 62 | Q92804 | 164 | HTQDDRRDVS   |
| 63 | Q92804 | 165 | TQDDRRDVSRY  |
| 64 | Q92804 | 185 | SQGGGRGRGGY  |
| 65 | Q92804 | 321 | SFATRPEFMR   |
| 66 | Q92804 | 372 | NMNFARRNSCN  |
| 67 | Q92804 | 415 | GRGGDRGGYGG  |
| 68 | Q92804 | 431 | GYGGDRSSGGG  |
| 69 | Q92804 | 459 | GYGGDRGGGYG  |
| 70 | Q92804 | 580 | GKMGGRNDYRN  |
| 71 | Q92804 | 584 | GRNDYRNDQRN  |
| 72 | P09867 | 82  | HKVDGRVVEPK  |
| 73 | P09867 | 88  | VVEPKRAVSRE  |
| 74 | O00267 | 17  | EEDSERSSDGE  |
| 75 | O00267 | 30  | EVDEERSAAG   |
| 76 | O00267 | 130 | LQNLWRDQREE  |
| 77 | O00267 | 368 | GNRYSRKGFLF  |
| 78 | O00267 | 571 | KVVTVRHQAVT  |
| 79 | O00267 | 641 | FVCKTRHLVLA  |
| 80 | O00267 | 652 | GGSKPRDVTNF  |
| 81 | O00267 | 783 | YGSGSRTPMYG  |
| 82 | P69697 | 7   | EPVDPRLPEWK  |
| 83 | P69697 | 56  | KRRQRRRPPQG  |
| 84 | Q15554 | 28  | SGRARRGRHEP  |
| 85 | Q15554 | 30  | RARRGRHEPGL  |
| 86 | Q15554 | 47  | GAGEARLEEAV  |
| 87 | Q15554 | 69  | ALRAFRRGSRYG |
| 88 | Q15554 | 72  | AFRGSRYGDFR  |
| 89 | Q15554 | 192 | TTQKLRNDLLN  |
| 90 | Q15554 | 356 | QPKNKRMTISR  |
| 91 | P15056 | 188 | KALMMRGLIPE  |
| 92 | P15056 | 260 | LFQGFRCQTCG  |
| 93 | P15056 | 347 | IPQPFRLPAED  |

|     |        |     |             |
|-----|--------|-----|-------------|
| 94  | P15056 | 360 | NQFGQRDRSSS |
| 95  | P15056 | 426 | GPQREBKSSSS |
| 96  | Q5TAQ9 | 161 | PALRERELGSS |
| 97  | Q96EY1 | 187 | PEELFRKIFGE |
| 98  | Q96EY1 | 272 | GPFVMRSTCRR |
| 99  | Q96EY1 | 276 | MRSTCRRCGGR |
| 100 | Q96EY1 | 281 | RRCGGRGSIII |
| 101 | Q96EY1 | 303 | AKQKKRVMIPV |
| 102 | Q96EY1 | 364 | LGGTARAQGLY |
| 103 | P06746 | 89  | KLEKIRQDDTS |
| 104 | P06746 | 126 | TLEDLRKNEDK |
| 105 | Q92997 | 215 | ASRLMRRHKRR |
| 106 | Q92997 | 220 | RRHKRRRRKQK |
| 107 | Q54G21 | 660 | KMMESRNEAIT |
| 108 | Q54G21 | 708 | INQLKRDYNTL |
| 109 | Q54G21 | 827 | TLETERSALSS |
| 110 | Q54G21 | 841 | LVENTRLETES |
| 111 | Q9R1E0 | 19  | FEPLPRQRST  |
| 112 | Q9R1E0 | 313 | STFRPRTSSNA |
| 113 | Q9R1E0 | 551 | TSAMNRLTPVK |
| 114 | Q9R1E0 | 586 | CNGYGRMGVLH |
| 115 | Q13283 | 106 | NNQALRRFMQT |
| 116 | Q13283 | 107 | NQALRRFMQTF |
| 117 | Q13283 | 283 | PASQPRPESKP |
| 118 | P31943 | 230 | GAGFERMRRGA |
| 119 | P04264 | 30  | INYQRRTTSSS |
| 120 | P04264 | 65  | GGFGSRSLVNL |
| 121 | P04264 | 199 | FIDKVRFLQQ  |
| 122 | P04264 | 343 | SMDNNRSLDL  |
| 123 | P08729 | 48  | GASRPVAVRS  |
| 124 | P08729 | 305 | DLRNRNEISE  |
| 125 | P15720 | 10  | KRSSFRHGSKM |
| 126 | P15720 | 48  | FFGGDRHVPRR |
| 127 | P15720 | 96  | NIVSPRTPPPM |
| 128 | P15720 | 162 | GGSGSRPGSRS |
| 129 | P25274 | 128 | FGYGGRAADYK |
| 130 | Q8IZS5 | 61  | EKKVIRHDMPD |
| 131 | Q8IZS5 | 67  | HDMPDRTLAAH |
| 132 | Q8IZS5 | 77  | HQQKFRLPASA |
| 133 | P11940 | 153 | QEAAERAIEKM |
| 134 | P11940 | 166 | MLLNDRKVFVG |
| 135 | P11940 | 186 | AELGARAKEFT |
| 136 | P11940 | 287 | QMKQDRITRYQ |
| 137 | P11940 | 331 | MMEGGRSKGFG |
| 138 | Q9JMB7 | 6   | MTGRARARARG |
| 139 | Q9JMB7 | 36  | GYIPPRPQQSP |
| 140 | Q9JMB7 | 51  | LVGRGRQGMV  |
| 141 | Q9JMB7 | 84  | ERGRRRDFHD  |
| 142 | Q9JMB7 | 147 | EARRLSALLF  |
| 143 | Q8CDG1 | 177 | FGLTARDPPRL |
| 144 | Q86WR7 | 140 | AGKEHRKQDAE |
| 145 | Q86WR7 | 204 | QKISERMAGNE |

|     |        |     |                                                         |
|-----|--------|-----|---------------------------------------------------------|
| 146 | Q86WR7 | 221 | PFREG <b>R</b> PGEWR                                    |
| 147 | P09651 | 265 | YSGGS <b>R</b> GYGSG                                    |
| 148 | P22626 | 185 | HNAE <b>V</b> RKALSR                                    |
| 149 | P51991 | 239 | GGN <b>F</b> RGGNFG                                     |
| 150 | Q99729 | 30  | EAS <b>R</b> RGWTGA                                     |
| 151 | P14678 | 228 | PPPG <b>M</b> RGPPPP                                    |
| 152 | Q14524 | 179 | VKIL <b>A</b> RGFCLH                                    |
| 153 | Q14524 | 340 | CPE <b>G</b> YRCLKAG                                    |
| 154 | Q14524 | 367 | FLAL <b>F</b> R <del>L</del> MTQD                       |
| 155 | P23246 | 399 | FGPI <b>E</b> RAVVIV                                    |
| 156 | P68363 | 105 | ANN <b>Y</b> ARGHYTI                                    |
| 157 | P68363 | 264 | LVP <b>Y</b> PR <del>I</del> HFP <del>L</del>           |
| 158 | P68363 | 320 | CCL <b>L</b> YRGDVVP                                    |
| 159 | P07437 | 77  | TMDS <b>V</b> RS <del>G</del> PFG                       |
| 160 | P07437 | 162 | EE <b>Y</b> PD <b>R</b> IMNTF                           |
| 161 | P07437 | 282 | GS <b>Q</b> Q <b>Y</b> RAL <del>T</del> V <del>P</del>  |
| 162 | P07437 | 359 | CDIP <b>P</b> RGLKMA                                    |
| 163 | Q86V81 | 20  | LN <b>R</b> S <b>Q</b> RGGRGG                           |
| 164 | Q86V81 | 174 | VPLD <b>G</b> RP <del>M</del> NIQ                       |
| 165 | Q86V81 | 197 | AQ <b>S</b> V <b>N</b> RGGMTR                           |
| 166 | Q86V81 | 202 | RGG <b>M</b> TRNRGAG                                    |
| 167 | O08583 | 56  | GGG <b>P</b> M <b>R</b> NRPAI                           |
| 168 | O08583 | 203 | GM <b>T</b> R <b>N</b> RGSGGF                           |
| 169 | P39748 | 70  | MGM <b>F</b> Y <b>R</b> TIRMM                           |
| 170 | P31269 | 207 | HAR <b>S</b> T <b>R</b> KKRCP                           |
| 171 | P31269 | 233 | N <b>M</b> Y <b>L</b> T <b>R</b> DRRYE                  |
| 172 | P31269 | 241 | RYE <b>V</b> ARLLNLT                                    |
| 173 | P04049 | 100 | CCA <b>V</b> F <b>R</b> LLHEH                           |
| 174 | P04049 | 143 | TH <b>N</b> F <b>A</b> RK <del>T</del> FLK              |
| 175 | P04049 | 231 | VSS <b>Q</b> H <b>R</b> Y <del>S</del> TPH              |
| 176 | P04049 | 282 | IED <b>A</b> I <b>R</b> SHSES                           |
| 177 | P04049 | 318 | PA <b>Q</b> RE <b>R</b> APVSG                           |
| 178 | P04049 | 333 | NK <b>I</b> R <b>P</b> R <b>G</b> Q <b>R</b> DS         |
| 179 | P46783 | 8   | MP <b>K</b> KN <b>R</b> IAIYE                           |
| 180 | P46783 | 80  | GI <b>Q</b> Y <b>L</b> R <b>D</b> Y <b>L</b> H <b>L</b> |
| 181 | P46783 | 96  | PAT <b>L</b> R <b>R</b> SRPET                           |
| 182 | P46783 | 105 | ET <b>G</b> R <b>P</b> R <b>P</b> KGLE                  |
| 183 | P46783 | 116 | GER <b>P</b> AR <b>L</b> TRGE                           |
| 184 | P46783 | 128 | DR <b>D</b> T <b>Y</b> RRSAVP                           |
| 185 | O76922 | 87  | SV <b>R</b> GR <b>L</b> LITDL                           |

**(2) Subset 2 (185 samples)**

| Sample # | Protein ID | Site | Sequences                              |
|----------|------------|------|----------------------------------------|
| 1        | Q9NR22     | 13   | RCL <b>L</b> L <b>R</b> RKMAE          |
| 2        | Q9NR22     | 14   | CL <b>L</b> L <b>R</b> RKMAEN          |
| 3        | Q9UBL3     | 211  | EC <b>M</b> T <b>T</b> R <b>Q</b> RPGK |
| 4        | Q9UBL3     | 231  | TMS <b>K</b> ER <b>D</b> VFLV          |
| 5        | Q9UBL3     | 315  | TT <b>K</b> K <b>A</b> RS <b>D</b> PLF |
| 6        | Q9UBL3     | 374  | PG <b>D</b> LY <b>R</b> ACLYE          |
| 7        | Q9UBL3     | 411  | G <b>Y</b> SM <b>V</b> RASHGV          |

|    |        |      |                |
|----|--------|------|----------------|
| 8  | Q9UBL3 | 592  | KDLTYRPMSDM    |
| 9  | Q92934 | 116  | GRELR RMSDEF   |
| 10 | Q92934 | 131  | KKGLP RPKSAG   |
| 11 | Q7Q2B7 | 84   | ELVLF R FASRG  |
| 12 | Q7Q2B7 | 88   | FRFAS R GDCQQ  |
| 13 | Q7Q2B7 | 95   | DCQQF R SLLHK  |
| 14 | Q7Q2B7 | 341  | EKDLH R IQIDV  |
| 15 | Q7Q2B7 | 447  | KNPYF R YTGAP  |
| 16 | P11911 | 47   | LGEEA R LTCEN  |
| 17 | P11911 | 96   | VNKNH R GLYWC  |
| 18 | P11911 | 137  | EGTKN R IITAE  |
| 19 | Q09472 | 1104 | LSTIK R KLDTG  |
| 20 | Q09472 | 1133 | AWLYN R KTSRV  |
| 21 | Q09472 | 1197 | YSYQN R YHFCE  |
| 22 | Q09472 | 1392 | PPNQ R VYISY   |
| 23 | Q09472 | 1494 | QATED R L TSAK |
| 24 | P03372 | 37   | KIPLER R PLGEV |
| 25 | P03372 | 142  | SGYTV R EAGPP  |
| 26 | P03372 | 241  | SCQAC R LRKCY  |
| 27 | P03372 | 436  | TSSRF R MMNLQ  |
| 28 | Q01844 | 392  | VKMNK R TGQPM  |
| 29 | P22509 | 56   | GGGGF R GRGGG  |
| 30 | P22509 | 84   | GRGGK R GNQSG  |
| 31 | P35637 | 521  | EHRQD R RERPY  |
| 32 | P03347 | 275  | LNKIV R MYSPT  |
| 33 | P03347 | 403  | EGHTA R NCRAP  |
| 34 | P68431 | 129  | DIQLA R RIRGE  |
| 35 | P62805 | 40   | IRRLA R RGGVK  |
| 36 | P62805 | 79   | TEHAK R KTVTA  |
| 37 | P31942 | 93   | IFRSS R SEIKG  |
| 38 | P31942 | 129  | YYGAG R GSMYD  |
| 39 | P31942 | 261  | NNMQH R YIELF  |
| 40 | P31942 | 301  | YGSVG R MGMGN  |
| 41 | P31942 | 323  | GGYGR R GGGGS  |
| 42 | O60506 | 103  | VMKTY R QREKQ  |
| 43 | O60506 | 229  | NNHEI R SGKHI  |
| 44 | O60506 | 451  | RGRGG R GGYGY  |
| 45 | O60506 | 504  | GGRGA R GAAPS  |
| 46 | O60506 | 557  | GARGG R GGNVG  |
| 47 | O60506 | 565  | NVGKK R KADGY  |
| 48 | Q07666 | 10   | DDPAARMSRSS    |
| 49 | Q07666 | 204  | GKGSMDKAKE     |
| 50 | Q07666 | 436  | VKGAY R EHPYG  |
| 51 | P08199 | 343  | AVVDV R TGTNR  |
| 52 | P08199 | 421  | DALEI R LVSQD  |
| 53 | P08199 | 474  | GQRQER T GKNS  |
| 54 | Q28165 | 17   | GAAGG R GSGPG  |
| 55 | Q28165 | 25   | GPGRR R HLVPG  |
| 56 | Q28165 | 78   | EPPRP R APPGA  |
| 57 | Q28165 | 200  | CGSVN R VTILC  |
| 58 | Q28165 | 248  | KVIPK R TNRPG  |
| 59 | O75925 | 276  | TAEIG R NY SMA |

|     |        |      |              |
|-----|--------|------|--------------|
| 60  | O75925 | 528  | LIQDYRHPFHM  |
| 61  | Q96PU8 | 106  | RILGPRGLTAK  |
| 62  | Q92804 | 221  | RDYGPRTDADS  |
| 63  | Q92804 | 320  | VSFATRRPEFM  |
| 64  | Q92804 | 341  | GRGGYRGRGGF  |
| 65  | Q92804 | 349  | GGFQGRGGDPK  |
| 66  | Q92804 | 388  | RPEDSRPSGGD  |
| 67  | Q92804 | 406  | GERGYRGRGGR  |
| 68  | Q92804 | 422  | GYGGDRSGGGY  |
| 69  | P09867 | 31   | TDESLRSHFEQ  |
| 70  | P09867 | 196  | SSQRGRSGSGN  |
| 71  | P09867 | 300  | YFAKPRNQGGY  |
| 72  | O00267 | 31   | VDEERRSAAGS  |
| 73  | O00267 | 65   | EEDDDRPPKKP  |
| 74  | O00267 | 319  | DRIKARMSLKD  |
| 75  | O00267 | 346  | DAEKIRSLGGD  |
| 76  | O00267 | 516  | LKVLPRDLQLC  |
| 77  | O00267 | 582  | RKKDNRFVAL   |
| 78  | O00267 | 711  | IGQTVRISQGP  |
| 79  | O00267 | 798  | LQDGSRTPHYG  |
| 80  | O00267 | 831  | PNTPSRAEEY   |
| 81  | O00267 | 1049 | ILGEDREATGV  |
| 82  | O00267 | 1066 | EDGIVRMDLDE  |
| 83  | P69697 | 78   | PTSQSRGDPTG  |
| 84  | Q15554 | 13   | SDGSGRAAGR   |
| 85  | Q15554 | 77   | RYGDFRQIRDI  |
| 86  | Q15554 | 102  | VSRLLRVMQCL  |
| 87  | P15056 | 239  | THNFVRKTFFT  |
| 88  | Q5TAQ9 | 11   | SSTDGRTDLAN  |
| 89  | Q5TAQ9 | 151  | ALPRPRWQALP  |
| 90  | Q5TAQ9 | 177  | EACGARVVFVQR |
| 91  | Q5TAQ9 | 182  | RVFVQRFRLQH  |
| 92  | Q96EY1 | 102  | ILGVPRNASQK  |
| 93  | Q96EY1 | 332  | IFITFRVQKSP  |
| 94  | P06746 | 102  | INFLTRVSGIG  |
| 95  | P06746 | 137  | LNHHQRIGLKY  |
| 96  | P06746 | 258  | RRIDIRLIPKD  |
| 97  | Q92997 | 145  | SAQREPRRRD   |
| 98  | Q92997 | 167  | AKGERRREPGG  |
| 99  | Q60487 | 105  | MKEDGRLASK   |
| 100 | Q54G21 | 180  | VANGDRVSIKY  |
| 101 | Q54G21 | 230  | GVIGMRKSAKR  |
| 102 | Q54G21 | 793  | EESLKRLKLDL  |
| 103 | Q54G21 | 1425 | IDNSPRQTTTE  |
| 104 | Q9R1E0 | 249  | GKSPRRRAASM  |
| 105 | Q9R1E0 | 487  | AQPNSRVLGQN  |
| 106 | Q9R1E0 | 534  | ASVNGRTLPHV  |
| 107 | Q13283 | 159  | EEPEERQQTPE  |
| 108 | Q13283 | 296  | QIPPQRPQRDQ  |
| 109 | P31943 | 16   | FVVKVRGLPWS  |
| 110 | P31943 | 52   | YTREGRPSGEA  |
| 111 | P31943 | 192  | SRAEVRTHYDP  |

|     |        |     |                                   |
|-----|--------|-----|-----------------------------------|
| 112 | P31943 | 217 | RPGAGR <b>GY</b> NSI              |
| 113 | P04264 | 37  | TSSSTR <b>RR</b> SGGG             |
| 114 | P04264 | 386 | QITAGR <b>HG</b> D <sup>S</sup> V |
| 115 | P08729 | 30  | RLSSAR <b>PG</b> GLG              |
| 116 | P08729 | 46  | GLGASR <b>PR</b> VAV              |
| 117 | P08729 | 52  | PRVAVR <b>S</b> AYGG              |
| 118 | P08729 | 64  | VGAGIR <b>EV</b> TIN              |
| 119 | P08729 | 187 | DEINHR <b>T</b> AAEN              |
| 120 | P08729 | 276 | MAKCSR <b>AE</b> EAE              |
| 121 | P08729 | 313 | ISEMNR <b>AI</b> QRL              |
| 122 | P08729 | 317 | NRAIQ <b>RL</b> QAEI              |
| 123 | Q36736 | 14  | SAKLD <b>RL</b> DQEF              |
| 124 | P02687 | 41  | LDSLGR <b>FF</b> FGSD             |
| 125 | P15720 | 78  | RSQHGR <b>PG</b> DDN              |
| 126 | P15720 | 166 | SRPGSR <b>SG</b> SPV              |
| 127 | P25274 | 9   | KRPSQ <b>RH</b> GSKY              |
| 128 | P25274 | 49  | FFSSDR <b>G</b> APKR              |
| 129 | Q8IZS5 | 31  | MVKED <b>RE</b> ATEG              |
| 130 | Q8IZS5 | 142 | QDESG <b>RE</b> ETLN              |
| 131 | Q8IZS5 | 177 | LEEFQ <b>RS</b> QKTI              |
| 132 | P11940 | 89  | IMWSQ <b>RD</b> PSLR              |
| 133 | P11940 | 206 | DMDDE <b>RL</b> KDLF              |
| 134 | P11940 | 278 | QTELK <b>RK</b> FEQM              |
| 135 | P11940 | 311 | DDERL <b>RK</b> EFSP              |
| 136 | Q9JMB7 | 83  | AERGG <b>RR</b> RDFH              |
| 137 | Q9JMB7 | 145 | LMEAR <b>RL</b> RSAL              |
| 138 | Q9JMB7 | 160 | EDLIG <b>R</b> CHAFD              |
| 139 | Q8CDG1 | 9   | VRPLF <b>R</b> GP <sup>T</sup> PV |
| 140 | Q8CDG1 | 88  | RPPSK <b>RE</b> VPPL              |
| 141 | Q8CDG1 | 111 | MVRKD <b>RE</b> EPRS              |
| 142 | Q8CDG1 | 156 | LLPLG <b>RA</b> ASSI              |
| 143 | Q86WR7 | 6   | MPVTH <b>RK</b> S <sup>D</sup> AS |
| 144 | Q86WR7 | 22  | TSPSC <b>RL</b> RAFS              |
| 145 | Q86WR7 | 173 | PDP <b>PR</b> ELRAP               |
| 146 | Q86WR7 | 176 | PRREL <b>R</b> APSPP              |
| 147 | Q86WR7 | 265 | TNGA <b>A</b> REPRRT              |
| 148 | P22626 | 15  | LERKK <b>RE</b> KEQF              |
| 149 | P22626 | 60  | DPASK <b>RS</b> R <sup>G</sup> FG |
| 150 | P22626 | 228 | PGSNF <b>R</b> GGSDG              |
| 151 | P22626 | 238 | GYGSG <b>R</b> GFGDG              |
| 152 | P51991 | 9   | KPPPG <b>R</b> PQ <sup>P</sup> DS |
| 153 | P51991 | 113 | KRAVS <b>RE</b> DSVK              |
| 154 | P51991 | 143 | EEYNL <b>R</b> DYFEK              |
| 155 | P51991 | 226 | GNFMG <b>R</b> GGNFG              |
| 156 | Q99729 | 248 | GGRGN <b>R</b> NRGNR              |
| 157 | Q99729 | 250 | RGNRN <b>R</b> GNRGS              |
| 158 | P14678 | 221 | PPPGM <b>R</b> PPPPG              |
| 159 | P23246 | 7   | SRDRF <b>RS</b> RGGG              |
| 160 | P23246 | 18  | GGGFH <b>R</b> RGGGG              |
| 161 | P23246 | 25  | GGGG <b>R</b> GGGLHD              |
| 162 | P68363 | 215 | YDICR <b>R</b> NLDIE              |
| 163 | P68363 | 243 | ITASL <b>R</b> FDGAL              |

|     |        |     |                               |
|-----|--------|-----|-------------------------------|
| 164 | P68363 | 308 | VKCDP <b>R</b> HGKYM          |
| 165 | P07437 | 213 | YDICF <b>R</b> TLKLT          |
| 166 | P07437 | 241 | VTTCL <b>R</b> FPGQL          |
| 167 | P07437 | 276 | APLTS <b>R</b> GSQQY          |
| 168 | P07437 | 306 | AACDP <b>R</b> HGRYL          |
| 169 | P07437 | 380 | QELFK <b>R</b> ISEQF          |
| 170 | Q86V81 | 63  | RPAI <b>A</b> RGAAGG          |
| 171 | Q86V81 | 79  | PAPYS <b>R</b> PKQLP          |
| 172 | Q86V81 | 144 | YDRSG <b>R</b> SLGTA          |
| 173 | O08583 | 189 | IDT <b>Q</b> R <b>R</b> PAQSI |
| 174 | P39748 | 211 | EFHLS <b>R</b> ILQEL          |
| 175 | P39748 | 239 | YCESI <b>R</b> GIGPK          |
| 176 | P39748 | 332 | RLSKS <b>R</b> QGSTQ          |
| 177 | P39748 | 355 | LSSAK <b>R</b> KEPEP          |
| 178 | P31269 | 128 | GLPSS <b>R</b> PYGIK          |
| 179 | P31269 | 141 | PLSAR <b>R</b> GDCPT          |
| 180 | P04049 | 59  | TSNTI <b>R</b> VFLPN          |
| 181 | P04049 | 223 | RESVS <b>R</b> MPVSS          |
| 182 | P46783 | 55  | QSLKS <b>R</b> GYVKE          |
| 183 | O76922 | 86  | GSVR <b>G</b> RRLITD          |
| 184 | O76922 | 123 | FKVLK <b>R</b> PNWTI          |
| 185 | O76922 | 146 | ATRL <b>R</b> RSFLYE          |

### (3) Subset 3 (185 samples)

| Sample # | Protein ID | Site | Sequences                                       |
|----------|------------|------|-------------------------------------------------|
| 1        | Q9NR22     | 368  | NAKNV <b>R</b> DLDFI                            |
| 2        | Q9UBL3     | 181  | LTWQS <b>R</b> TQDEH                            |
| 3        | Q9UBL3     | 380  | ACLYE <b>R</b> VLLAL                            |
| 4        | Q9UBL3     | 417  | ASHGV <b>R</b> KGAWY                            |
| 5        | Q9UBL3     | 437  | PD <b>T</b> A <b>A</b> R <b>L</b> GWSQ          |
| 6        | Q9UBL3     | 622  | EVDG <b>R</b> RSPPE                             |
| 7        | Q92934     | 112  | AQRY <b>G</b> RELRRM                            |
| 8        | Q92934     | 142  | TATQ <b>M</b> RQSSSW                            |
| 9        | Q92934     | 149  | SSSW <b>T</b> R <b>V</b> FQSW                   |
| 10       | Q92934     | 157  | QSWW <b>D</b> RNLGRG                            |
| 11       | Q7Q2B7     | 40   | QGM <b>A</b> V <b>R</b> LLQEG                   |
| 12       | Q7Q2B7     | 67   | T <b>T</b> HL <b>S</b> R <b>G</b> H <b>T</b> SH |
| 13       | Q7Q2B7     | 299  | NL <b>V</b> AL <b>R</b> DAAMK                   |
| 14       | P11911     | 162  | LLFRK <b>R</b> WQNEK                            |
| 15       | Q09472     | 15   | PPSAK <b>R</b> PKLSS                            |
| 16       | Q09472     | 370  | NLPH <b>C</b> RTMKNV                            |
| 17       | Q09472     | 504  | SPQGM <b>R</b> PMNSM                            |
| 18       | Q09472     | 626  | ESANN <b>R</b> AEYYH                            |
| 19       | Q09472     | 1187 | LCTI <b>P</b> R <b>D</b> ATYY                   |
| 20       | Q09472     | 1297 | RLP <b>S</b> T <b>R</b> LG <b>T</b> FL          |
| 21       | Q09472     | 1342 | PGMK <b>A</b> R <b>F</b> VDSG                   |
| 22       | P03372     | 183  | SAKET <b>R</b> YCAVC                            |
| 23       | P03372     | 269  | MLKHK <b>R</b> QRDDG                            |
| 24       | Q01844     | 486  | GGPM <b>G</b> RMGGRG                            |
| 25       | P22509     | 38   | GFGG <b>G</b> RGGFGG                            |

|    |        |     |              |
|----|--------|-----|--------------|
| 26 | P22509 | 58  | GGFRGRGGGGG  |
| 27 | P22509 | 74  | QSGGGRGRGGG  |
| 28 | P22509 | 106 | GVFICRGKEDA  |
| 29 | P35637 | 216 | QDRGGGRGGGS  |
| 30 | P35637 | 234 | GGGYNRSSGGY  |
| 31 | P35637 | 372 | SFATRRAFDFNR |
| 32 | P35637 | 518 | SRGEHRQDRRE  |
| 33 | P03347 | 20  | RWEKIRLRPGG  |
| 34 | P03347 | 22  | EKIRLRPGGKK  |
| 35 | P68431 | 41  | VKKPHRYRPGT  |
| 36 | P68431 | 43  | KPHRYRPGTVA  |
| 37 | P68431 | 50  | GTVALREIRRY  |
| 38 | P68431 | 64  | TELLIRKLPFQ  |
| 39 | P68431 | 84  | FKTDLRFQSSA  |
| 40 | P62805 | 18  | KGGAKRHRKVL  |
| 41 | P62805 | 37  | KPAIRRLARRG  |
| 42 | P62805 | 46  | RGGVKRISGLI  |
| 43 | P17096 | 24  | DGTEKRGRGRP  |
| 44 | P17096 | 28  | KRGRGRPRKQP  |
| 45 | P31942 | 174 | RMRDGRGMGGH  |
| 46 | P31942 | 205 | RGLPFRATEND  |
| 47 | O60506 | 381 | IHFDERDGAVK  |
| 48 | O60506 | 526 | AGYSQRGGPGS  |
| 49 | O60506 | 554 | GVRGARGGRRGG |
| 50 | O60506 | 577 | QPDSKRRQTNN  |
| 51 | O60506 | 578 | PDSKRRQTNNQ  |
| 52 | Q07666 | 31  | AHPSVRQTPSR  |
| 53 | Q07666 | 282 | VPEPSRGRGVP  |
| 54 | Q07666 | 284 | EPSRGRGVPVR  |
| 55 | Q07666 | 346 | GAPAPRARTAG  |
| 56 | P08199 | 348 | RTGTNRKFGYV  |
| 57 | P08199 | 554 | EGRTIRLELQG  |
| 58 | P08199 | 599 | GSVRARIVTDR  |
| 59 | Q28165 | 23  | GSGPGRRRHLV  |
| 60 | O75925 | 248 | PKRPSRPINIT  |
| 61 | O75925 | 347 | LTIPCRALTCS  |
| 62 | O75925 | 417 | TWAPMRSKKEV  |
| 63 | O75925 | 507 | ASPVSRTPSLP  |
| 64 | Q96PU8 | 53  | EISRVRKDMYN  |
| 65 | Q96PU8 | 139 | KEEQNRGKPNW  |
| 66 | Q96PU8 | 205 | LNGTYRDANIK  |
| 67 | Q96PU8 | 256 | IMPLIRQIQTA  |
| 68 | Q96PU8 | 320 | ATKVRRHDMRV  |
| 69 | Q96PU8 | 324 | RRHDMRVHPYQ  |
| 70 | Q92804 | 216 | NFGGHRDYGPR  |
| 71 | Q92804 | 334 | GSGGRRRGRGG  |
| 72 | Q92804 | 335 | SGGRRRGRGGY  |
| 73 | Q92804 | 411 | RGRGGRRGGDRG |
| 74 | P09867 | 122 | EEHHLRDYFEQ  |
| 75 | P09867 | 140 | EIMTDRGSGKK  |
| 76 | P09867 | 284 | GNFGGRSSGPY  |
| 77 | O00267 | 71  | PPKKPRHGGFI  |

|     |        |      |               |
|-----|--------|------|---------------|
| 78  | O00267 | 190  | KIGEERATAIS   |
| 79  | O00267 | 198  | AISLMRKFIA Y  |
| 80  | O00267 | 610  | GPHSGREGEIR   |
| 81  | O00267 | 615  | REGEIRHLFRS   |
| 82  | O00267 | 619  | IRHLFRSFAFL   |
| 83  | O00267 | 767  | TSTYGRTPMYG   |
| 84  | O00267 | 989  | IQVKVRD TYLD  |
| 85  | P69697 | 49   | GISYGRKKRRQ   |
| 86  | Q15554 | 41   | GGPAER GAGEA  |
| 87  | Q15554 | 274  | PREPARQLRNP   |
| 88  | P15056 | 199  | CCAVYRIQDGE   |
| 89  | P15056 | 362  | FGQRDRSSSAP   |
| 90  | P15056 | 384  | IDDLIRDQGFR   |
| 91  | P15056 | 435  | SSSEDNRMK T   |
| 92  | Q5TAQ9 | 65   | TSTESRGT DTE  |
| 93  | Q5TAQ9 | 94   | INDENRVH DRS  |
| 94  | Q5TAQ9 | 117  | EQPRR RVQRKR  |
| 95  | Q5TAQ9 | 125  | RKRANRDQ DSS  |
| 96  | Q5TAQ9 | 134  | SSDDE RALEDW  |
| 97  | Q5TAQ9 | 149  | TSALP RPRWQA  |
| 98  | Q5TAQ9 | 159  | ALPALRER ELG  |
| 99  | Q96EY1 | 25   | PAISGRGAR PP  |
| 100 | Q96EY1 | 340  | KSPVFR RDGAD  |
| 101 | Q96EY1 | 341  | SPVFR RDGADI  |
| 102 | P06746 | 182  | VCGSFR GAES   |
| 103 | Q92997 | 73   | PCFNGRV VSWL  |
| 104 | Q92997 | 105  | PPPMERT GGIG  |
| 105 | Q92997 | 200  | DDSTSRF SSST  |
| 106 | Q92997 | 219  | MRRHKRRR RQ   |
| 107 | Q60487 | 16   | AAAARRE PPGA  |
| 108 | Q60487 | 96   | GVCANRYL AMK  |
| 109 | Q60487 | 144  | YVALKRTG QYK  |
| 110 | Q54G21 | 235  | RKSAKRIL VIP  |
| 111 | Q54G21 | 613  | VQTLHRLV EDN  |
| 112 | Q54G21 | 673  | VAQMRRQI IDL  |
| 113 | Q54G21 | 746  | YALKIRAFK KS  |
| 114 | Q54G21 | 1031 | KDVIKRV TVEY  |
| 115 | Q9R1E0 | 222  | HSKFIRVQ NEG  |
| 116 | Q9R1E0 | 264  | KFAKSRG RAAK  |
| 117 | Q13283 | 32   | PDMLHRF YGKN  |
| 118 | Q13283 | 78   | CHTKIRH VDAH  |
| 119 | Q13283 | 302  | PQRDQRV REQR  |
| 120 | Q13283 | 304  | RDQRVRE QRIN  |
| 121 | Q13283 | 317  | PQRGPRP IREA  |
| 122 | Q13283 | 331  | GDIEPRRM VRH  |
| 123 | Q13283 | 332  | DIEPRRMV RHP  |
| 124 | Q13283 | 370  | NVVELRINS GG  |
| 125 | P31943 | 49   | RFIYTR EGRPS  |
| 126 | P31943 | 199  | HYDPPR KLMAM  |
| 127 | P04264 | 12   | SRSYGRSG GGF  |
| 128 | P04264 | 29   | IINYQRRT TSS  |
| 129 | P04264 | 239  | FINNLR RRV DQ |

|     |        |     |               |
|-----|--------|-----|---------------|
| 130 | P08729 | 13  | PVFTSRSAAFS   |
| 131 | P02687 | 129 | FGYGGRASDYK   |
| 132 | P02687 | 158 | FKLGGDRSRSG   |
| 133 | P15720 | 52  | DRHVPRRGFGK   |
| 134 | P15720 | 112 | GLSLTRFSWGG   |
| 135 | P25274 | 111 | GTVLSRFSWGA   |
| 136 | P11940 | 49  | RDMITRRSLGY   |
| 137 | P11940 | 67  | PADAERALDTM   |
| 138 | P11940 | 83  | KGKPVIRIMWSQ  |
| 139 | P11940 | 94  | RDP SLRKSGVG  |
| 140 | P11940 | 240 | FV S FERHEDAQ |
| 141 | Q9JMB7 | 8   | GRARARARGRA   |
| 142 | Q9JMB7 | 10  | ARARARGRARG   |
| 143 | Q9JMB7 | 53  | GRGRQRGMVVG   |
| 144 | Q9JMB7 | 95  | LGVNTRQNLDH   |
| 145 | Q9JMB7 | 193 | NGEHVIRITITL  |
| 146 | Q8CDG1 | 21  | PSQCVRMPGCW   |
| 147 | Q8CDG1 | 31  | WPQAPRPLEPA   |
| 148 | Q8CDG1 | 50  | RGLVFRKPEDS   |
| 149 | Q8CDG1 | 206 | VL T MERKEKEL |
| 150 | Q86WR7 | 186 | PVEHPRLLRSV   |
| 151 | P22626 | 62  | ASKRSRGGFGV   |
| 152 | P22626 | 99  | KRAVAREESGK   |
| 153 | P22626 | 147 | EIITDRQSGKK   |
| 154 | P51991 | 167 | QSGKRRGFAFV   |
| 155 | Q99729 | 28  | VPEASRGRGWT   |
| 156 | P14678 | 16  | QHIDYRMRCIL   |
| 157 | P14678 | 73  | GLVLLRGENLV   |
| 158 | P14678 | 108 | GPGIGRAAGRG   |
| 159 | P14678 | 209 | GIPPGRGTPMG   |
| 160 | Q14524 | 34  | AEKQARGSTTL   |
| 161 | Q14524 | 43  | TLQESREGLPE   |
| 162 | Q14524 | 222 | ALRTFRVLRAL   |
| 163 | Q14524 | 225 | TFRVLRALKTI   |
| 164 | Q14524 | 282 | RHKCVRNFTAL   |
| 165 | P23246 | 9   | DRFRSRGGGGG   |
| 166 | P23246 | 267 | GGPGRRSEEKI   |
| 167 | P23246 | 315 | EDEFKRLFAKY   |
| 168 | P23246 | 342 | IKLESRALAEI   |
| 169 | P68363 | 221 | NLDIERPTYTN   |
| 170 | P07437 | 262 | MVPFPRLHFFM   |
| 171 | Q86V81 | 29  | GGGRGRGRAGS   |
| 172 | Q86V81 | 73  | GGGRNRPAPYS   |
| 173 | Q86V81 | 155 | DVHFERKADAL   |
| 174 | Q86V81 | 204 | GMTRNRGAGGF   |
| 175 | O08583 | 38  | GSQGGRRGAVQ   |
| 176 | O08583 | 188 | QIDTQRPAQS    |
| 177 | O08583 | 196 | AQSINRRGMTR   |
| 178 | P31269 | 106 | AAPDGRYMRSW   |
| 179 | P31269 | 109 | DGRYMRSWLEP   |
| 180 | P31269 | 248 | LNLTERQVKIW   |
| 181 | P31269 | 258 | WFQNRMRMKMK   |

|     |        |     |             |
|-----|--------|-----|-------------|
| 182 | P04049 | 316 | PVPAQRERAPV |
| 183 | O76922 | 11  | NPVIARGRGRG |
| 184 | O76922 | 26  | NVEANRGFAPS |
| 185 | O76922 | 189 | LVTKSRAGENI |

## (4) Subset 4 (185 samples)

| Sample # | Protein ID | Site | Sequences    |
|----------|------------|------|--------------|
| 1        | Q9NR22     | 95   | LKDEVRTLTYR  |
| 2        | Q9NR22     | 204  | TVIFARDKWLK  |
| 3        | Q9NR22     | 218  | LMFPDRAALYV  |
| 4        | Q9NR22     | 300  | CLQIQRNDYVH  |
| 5        | Q9UBL3     | 108  | DEENGRQLGEV  |
| 6        | Q9UBL3     | 160  | NTYFLRKQANL  |
| 7        | Q92934     | 109  | LWAAQRYGREL  |
| 8        | Q7Q2B7     | 261  | KMYPSRGLHV   |
| 9        | P11911     | 125  | RNPVPRPFLDM  |
| 10       | P11911     | 160  | TLLLFRKRWQN  |
| 11       | Q09472     | 237  | GQTGLRGPQPL  |
| 12       | Q09472     | 353  | AHKCQRREQAN  |
| 13       | Q09472     | 466  | PSSIERAYAAL  |
| 14       | Q09472     | 754  | MGYGPRMQQPS  |
| 15       | Q09472     | 883  | LHPPPRQTPTP  |
| 16       | Q09472     | 915  | PQQQPRSQOST  |
| 17       | Q09472     | 1055 | KPEELRQALMP  |
| 18       | Q09472     | 1137 | NRKTSRVYKYC  |
| 19       | Q09472     | 1166 | GYCCGRKLEFS  |
| 20       | P03372     | 162  | RRQGGRRERLAS |
| 21       | P03372     | 243  | QACRLRKCYEV  |
| 22       | P03372     | 259  | GIRKDRGGRM   |
| 23       | P03372     | 277  | DDGEGRGEVGS  |
| 24       | P03372     | 300  | PLMIKRSKNS   |
| 25       | P03372     | 394  | IGLVWRSMHP   |
| 26       | P03372     | 434  | LATSSRFRMMN  |
| 27       | P03372     | 548  | MLDAHRLHAPT  |
| 28       | Q01844     | 138  | ATAPTTRPDGN  |
| 29       | Q01844     | 461  | GGLPPREGRGM  |
| 30       | Q01844     | 518  | GNVQHRAGDWQ  |
| 31       | P22509     | 80   | GRGGGRGGKRG  |
| 32       | P22509     | 213  | NLAKKRTNIIP  |
| 33       | P22509     | 250  | QPDQTRIVALN  |
| 34       | P35637     | 371  | VSFATRRADFN  |
| 35       | P35637     | 472  | NYGDDRRGGRG  |
| 36       | P35637     | 514  | GKMDSRGEHRQ  |
| 37       | P03347     | 91   | YCVHQRIEIKD  |
| 38       | P03347     | 150  | QAISPRTLNAW  |
| 39       | P03347     | 380  | TIMMQRGNFRN  |
| 40       | P03347     | 464  | PFLQSRPEPTA  |
| 41       | P03347     | 476  | PEESFRSGVET  |
| 42       | P68431     | 70   | KLPFQRLVREI  |
| 43       | P62805     | 36   | TKPAIRRLARR  |

|    |        |     |                       |
|----|--------|-----|-----------------------|
| 44 | P62805 | 41  | RRLAR <b>R</b> GGVKR  |
| 45 | P62805 | 56  | IYEET <b>R</b> GV LKV |
| 46 | P17096 | 73  | GAAK <b>T</b> RKTTTT  |
| 47 | P17096 | 86  | RKPRG <b>R</b> PKKLE  |
| 48 | P31942 | 116 | PGPYD <b>R</b> PIGGR  |
| 49 | P31942 | 137 | MYDRM <b>R</b> RRGGDG |
| 50 | P31942 | 232 | IGADG <b>R</b> ATGEA  |
| 51 | O60506 | 60  | SDLDE <b>R</b> AIEAL  |
| 52 | O60506 | 286 | DKKKN <b>R</b> GF CFL |
| 53 | O60506 | 343 | KVLFV <b>R</b> NLANT  |
| 54 | O60506 | 520 | APPRG <b>R</b> AGYSQ  |
| 55 | Q07666 | 17  | SRSSG <b>R</b> SGSMD  |
| 56 | Q07666 | 213 | KEEEL <b>R</b> KGGDP  |
| 57 | Q07666 | 289 | RGVPV <b>R</b> GRGAA  |
| 58 | Q07666 | 354 | TAGIQ <b>R</b> IPLPP  |
| 59 | P08199 | 281 | PAPGK <b>R</b> KKEMT  |
| 60 | P08199 | 471 | GEKGQ <b>R</b> QERTG  |
| 61 | P08199 | 551 | MEIEG <b>R</b> TIRLE  |
| 62 | P08199 | 597 | FEGSV <b>R</b> ARIVT  |
| 63 | Q28165 | 24  | SGPGR <b>R</b> RHLVP  |
| 64 | Q28165 | 125 | EAIKAR <b>V</b> REME  |
| 65 | O75925 | 28  | LGYAG <b>R</b> NKHGR  |
| 66 | O75925 | 163 | SDNSQ <b>R</b> FR ETC |
| 67 | O75925 | 296 | TVLLQ <b>R</b> LR AKG |
| 68 | O75925 | 330 | ATTSL <b>R</b> VSLLC  |
| 69 | O75925 | 632 | HTVTN <b>R</b> SSTDT  |
| 70 | Q96PU8 | 43  | FNHLE <b>R</b> LLDEE  |
| 71 | Q96PU8 | 101 | FNFV <b>G</b> RILGPR  |
| 72 | Q96PU8 | 330 | VHPYQ <b>R</b> I VTAD |
| 73 | Q96PU8 | 336 | I VTAD <b>R</b> AATGN |
| 74 | Q92804 | 153 | SYHSQ <b>R</b> ENYSH  |
| 75 | Q92804 | 169 | RRDVS <b>R</b> YGEDN  |
| 76 | Q92804 | 187 | GGGRG <b>R</b> GGYDK  |
| 77 | Q92804 | 195 | YDKDG <b>R</b> GPMTG  |
| 78 | Q92804 | 326 | RPEFM <b>R</b> GGGSG  |
| 79 | Q92804 | 373 | MNFAR <b>R</b> NSCNQ  |
| 80 | Q92804 | 395 | SGGDF <b>R</b> GRGYG  |
| 81 | Q92804 | 441 | GYSGD <b>R</b> SRGGY  |
| 82 | Q92804 | 526 | GYGGD <b>R</b> SRGGY  |
| 83 | P09867 | 53  | DPNTK <b>R</b> SRGFG  |
| 84 | P09867 | 178 | HNCEV <b>R</b> KALSK  |
| 85 | P09867 | 218 | NDNF <b>G</b> RGGNFS  |
| 86 | O00267 | 123 | DRSGA <b>R</b> RLQNL  |
| 87 | O00267 | 133 | LWRDQ <b>R</b> EEELG  |
| 88 | O00267 | 246 | GVGNL <b>R</b> LG YWN |
| 89 | O00267 | 334 | RKKFK <b>R</b> PPQRL  |
| 90 | O00267 | 416 | STGKE <b>R</b> EHNFQ  |
| 91 | O00267 | 747 | TISVD <b>R</b> QRLTT  |
| 92 | Q15554 | 25  | SRSSG <b>R</b> ARRGR  |
| 93 | Q15554 | 66  | FHEAL <b>R</b> AFRGS  |
| 94 | Q15554 | 89  | QALLV <b>R</b> PLGKE  |
| 95 | Q15554 | 200 | LLNI <b>R</b> EKNLA   |

|     |        |     |              |
|-----|--------|-----|--------------|
| 96  | Q15554 | 270 | VEKPPREPARQ  |
| 97  | Q15554 | 361 | RMTISRLVLEE  |
| 98  | Q15554 | 490 | VMIKDRWRMTK  |
| 99  | Q5TAQ9 | 116 | EEQPRRRVQRK  |
| 100 | Q96EY1 | 8   | ARCSTRWLLVV  |
| 101 | Q96EY1 | 28  | SGRGARPPREG  |
| 102 | Q96EY1 | 319 | DGQTVRMPVGK  |
| 103 | Q96EY1 | 325 | MPVGKREIFIT  |
| 104 | P06746 | 40  | KYNAYRKAASV  |
| 105 | P06746 | 112 | GPSAARKFVDE  |
| 106 | P06746 | 253 | KEYPHRRIDIR  |
| 107 | P06746 | 299 | NEYTIRPLGVT  |
| 108 | P06746 | 328 | IQWKYREPKDR  |
| 109 | Q92997 | 231 | VSRIERSSSFS  |
| 110 | Q60487 | 63  | IHPDGRVDGVR  |
| 111 | Q60487 | 84  | LQAEDRGVVS   |
| 112 | Q60487 | 131 | NYNTYRSRKYS  |
| 113 | Q9R1E0 | 21  | PLPRQRSCTWP  |
| 114 | Q9R1E0 | 98  | AAAASRGLCGD  |
| 115 | Q9R1E0 | 154 | TSSSRRNAWGN  |
| 116 | Q9R1E0 | 266 | AKSRGRAAKKK  |
| 117 | Q9R1E0 | 311 | NWSTFRPRTSS  |
| 118 | Q13283 | 299 | PQRPQRDQVR   |
| 119 | Q13283 | 307 | RVREQRINIPP  |
| 120 | Q13283 | 335 | PRRMVRHPDSH  |
| 121 | P31943 | 81  | ETMGHRYVEVF  |
| 122 | P31943 | 114 | NDGFVRLRGLP  |
| 123 | P31943 | 224 | YNSIGRGAGFE  |
| 124 | P31943 | 232 | GFERMRRGAYG  |
| 125 | P31943 | 262 | SDRFGDLNYC   |
| 126 | P04264 | 179 | QKVKSBREREQI |
| 127 | P04264 | 240 | INNLRRRVDQL  |
| 128 | P04264 | 241 | NNLRRRVDQLK  |
| 129 | P04264 | 403 | I SELNRVIQRL |
| 130 | P08729 | 25  | RGAQVRLSSAR  |
| 131 | P08729 | 88  | SLQVRVQEASE  |
| 132 | P08729 | 161 | QVDGGRLEAEL  |
| 133 | P08729 | 226 | EINFLRTLNET  |
| 134 | Q36736 | 21  | DQEFNRKMQEQ  |
| 135 | P02687 | 9   | KRPSQRSKYLA  |
| 136 | P02687 | 63  | GHHAARTTHYG  |
| 137 | P15720 | 53  | RHVPRRGFGKD  |
| 138 | P25274 | 63  | KDHAARTTHYG  |
| 139 | P25274 | 77  | QKSGHRPQDEN  |
| 140 | Q8IZS5 | 91  | GNEYGRNYFDP  |
| 141 | Q8IZS5 | 118 | REDDDRIFYNR  |
| 142 | Q8IZS5 | 221 | VTAVIRSRYY   |
| 143 | Q8IZS5 | 223 | AVIRSRYYRE   |
| 144 | P11940 | 44  | SIRVCRDMITR  |
| 145 | P11940 | 172 | KVFGVGRFKSRK |
| 146 | Q9JMB7 | 125 | FRLTSRPQWAL  |
| 147 | Q8CDG1 | 39  | EPAWGRAGPAG  |

|     |        |     |             |
|-----|--------|-----|-------------|
| 148 | Q8CDG1 | 108 | SANMVRKDREE |
| 149 | Q8CDG1 | 115 | DREEPRSSLPD |
| 150 | Q86WR7 | 231 | RTPAARGPRSG |
| 151 | Q86WR7 | 268 | AAREPRTLRSR |
| 152 | P51991 | 16  | QPDSGRRRRRR |
| 153 | P51991 | 19  | SGRRRRRRGEE |
| 154 | P51991 | 20  | GRRRRRRGEEG |
| 155 | Q99729 | 194 | PKLNKRRGFVF |
| 156 | Q99729 | 322 | GKSQRGGHQN  |
| 157 | P14678 | 94  | DTGIARVPLAG |
| 158 | P14678 | 112 | GRAAGRGIPAG |
| 159 | Q14524 | 219 | NVSALRTFRVL |
| 160 | Q14524 | 376 | QDCWERLYQOT |
| 161 | Q14524 | 433 | EEKEKRFQEAM |
| 162 | P23246 | 32  | GLHDFRSPPPG |
| 163 | P23246 | 287 | LSLLRRPGEKT |
| 164 | P23246 | 298 | YTQRCRLFVGN |
| 165 | P23246 | 407 | VIVDDRGRSTG |
| 166 | P07437 | 62  | GKYVPRAILVD |
| 167 | P07437 | 390 | FTAMFRRKAFL |
| 168 | Q86V81 | 31  | GRGRGRAGSQG |
| 169 | Q86V81 | 47  | AQAAARVNRGG |
| 170 | O08583 | 50  | AARVNRRGGPM |
| 171 | P39748 | 29  | KSYFGRKVAID |
| 172 | P39748 | 47  | FLIAVRQGGDV |
| 173 | P39748 | 261 | IEEIVRRLDPN |
| 174 | P39748 | 320 | QFSEERIRSGV |
| 175 | P31269 | 210 | STRKKRCPYTK |
| 176 | P31269 | 257 | IWFQNRMKMK  |
| 177 | P04049 | 73  | TVVNVNRGMSL |
| 178 | P04049 | 111 | KGKKARLDWNT |
| 179 | P04049 | 218 | TMRMRRESVSR |
| 180 | P04049 | 256 | LSQRQRSTSTP |
| 181 | P46783 | 65  | EQFAWRHFYWY |
| 182 | P46783 | 119 | PARLTRGEADR |
| 183 | O76922 | 96  | DLVYSRPPGMT |
| 184 | O76922 | 248 | NLENFRMQLWP |
| 185 | O76922 | 291 | LSDAIRDSDDY |

**(5) Subset 5 (185 samples)**

| Sample # | Protein ID | Site | Sequences    |
|----------|------------|------|--------------|
| 1        | Q9NR22     | 251  | DMTCIRDVAMK  |
| 2        | Q9UBL3     | 213  | MTTRQRP GKMT |
| 3        | Q9UBL3     | 621  | TEVDGRRSPPW  |
| 4        | Q92934     | 20   | SSSAERGLGPS  |
| 5        | Q92934     | 115  | YGRELRRMSDE  |
| 6        | Q7Q2B7     | 146  | TSTYQRAIYNN  |
| 7        | Q7Q2B7     | 239  | MLYNERMLETY  |
| 8        | Q7Q2B7     | 308  | MKEYFRQPIVD  |
| 9        | Q7Q2B7     | 326  | MAKSI RHTTNF |

|    |        |      |              |
|----|--------|------|--------------|
| 10 | P11911 | 30   | GCQALRVEGGP  |
| 11 | P11911 | 55   | CENNGRNPNT   |
| 12 | P11911 | 120  | TYLRVRNPVPR  |
| 13 | Q09472 | 200  | SIGAGRGRQNM  |
| 14 | Q09472 | 362  | ANGEVRQCNLP  |
| 15 | Q09472 | 424  | NAGDKRNQQPI  |
| 16 | Q09472 | 613  | LVAYARKVEGD  |
| 17 | Q09472 | 648  | ELEEKRRTRLQ  |
| 18 | Q09472 | 651  | EKRRTLQKQN   |
| 19 | Q09472 | 695  | DPSMIRGSVPN  |
| 20 | Q09472 | 728  | PPIVPRQTPPL  |
| 21 | Q09472 | 838  | SPVPSRTPTPH  |
| 22 | Q09472 | 1067 | LEALYRQDPES  |
| 23 | Q09472 | 1234 | EQFSKRKNDTL  |
| 24 | Q09472 | 1281 | LKKSARTRKEN  |
| 25 | Q09472 | 1305 | TFLENRVNDFL  |
| 26 | Q09472 | 1311 | VNDFLRQNHHP  |
| 27 | Q09472 | 1312 | NDFLRRQNHPE  |
| 28 | Q09472 | 1391 | PPPNQRRVYIS  |
| 29 | Q09472 | 1405 | SVHFFRPKCLR  |
| 30 | P03372 | 211  | KAFFKRSIQGH  |
| 31 | P03372 | 233  | TIDKNRRKSCQ  |
| 32 | P03372 | 412  | NLLLDNRNQGKC |
| 33 | P03372 | 477  | KDHIHRVLDKI  |
| 34 | P03372 | 555  | HAPTSRGGASV  |
| 35 | Q01844 | 446  | KVSLARKKPPM  |
| 36 | Q01844 | 648  | DKGEHRQERRD  |
| 37 | Q01844 | 651  | EHRQERRDRPY  |
| 38 | P22509 | 64   | GGGGRRGGGFQ  |
| 39 | P22509 | 128  | VYGEKRVSISE  |
| 40 | P22509 | 204  | SHRSGRDLINL  |
| 41 | P22509 | 310  | LEPYERDHAVV  |
| 42 | P03347 | 15   | GGELDRWEKIR  |
| 43 | P03347 | 58   | TSEGCROILGQ  |
| 44 | P03347 | 361  | PGHKARVLAEA  |
| 45 | P03347 | 406  | TARNCRAPRKK  |
| 46 | P03347 | 444  | PSYKGRPGNFL  |
| 47 | P17096 | 30   | GRGRPRKQPPV  |
| 48 | P31942 | 80   | GKHKEIRIGHRY |
| 49 | P31942 | 200  | HFVHMRGLPFR  |
| 50 | O60506 | 142  | VTTGQRKYGGP  |
| 51 | O60506 | 192  | PIWDLRLMMDP  |
| 52 | O60506 | 203  | LTGLNRGYAFV  |
| 53 | O60506 | 366  | FGKLERVKCLK  |
| 54 | O60506 | 448  | TRGRGRGGRRG  |
| 55 | O60506 | 501  | RGRGGRGARGA  |
| 56 | O60506 | 546  | GAQQQRGRGVR  |
| 57 | Q07666 | 186  | GNTIKRRLQEET |
| 58 | Q07666 | 302  | PPPVPGRGVG   |
| 59 | P08199 | 561  | ELQGRGSPNA   |
| 60 | P08199 | 567  | GSPNARSQPSK  |
| 61 | Q28165 | 227  | DKESVRTSLAL  |

|     |        |      |               |
|-----|--------|------|---------------|
| 62  | Q28165 | 240  | SLFRGRQIKVI   |
| 63  | O75925 | 165  | NSQRFRETCFA   |
| 64  | Q96PU8 | 51   | DEEISRVRKDM   |
| 65  | Q96PU8 | 68   | GSTEKRS AELP  |
| 66  | Q96PU8 | 130  | GKGS MRD KKKE |
| 67  | Q92804 | 337  | GGRRGRGGYRG   |
| 68  | Q92804 | 343  | GGYRGRGGFQG   |
| 69  | Q92804 | 545  | GYGGDRSGGYG   |
| 70  | P09867 | 75   | AAMNARPHKVD   |
| 71  | P09867 | 97   | REDSORPGAHL   |
| 72  | P09867 | 146  | GSGK KRGF AFV |
| 73  | O00267 | 119  | VLDEDRSGARR   |
| 74  | O00267 | 469  | PAQELRKYFKM   |
| 75  | O00267 | 552  | VGVI VRLERET  |
| 76  | O00267 | 555  | IVRLE RETFQV  |
| 77  | O00267 | 668  | APMS PR ISSPM |
| 78  | O00267 | 700  | SRGRGRRDNEL   |
| 79  | O00267 | 701  | RGRGRRDNELI   |
| 80  | O00267 | 757  | TVGSR RP GGMT |
| 81  | O00267 | 1005 | QTGVI RSVTGG  |
| 82  | P69697 | 55   | KKRRQR RRPPQ  |
| 83  | Q15554 | 27   | SSGRARRGRHE   |
| 84  | Q15554 | 99   | EHTVSRLLRVM   |
| 85  | Q15554 | 109  | MQCLSR IEEGE  |
| 86  | Q15554 | 492  | IKDRWR TMKRL  |
| 87  | P15056 | 95   | DALQQREQQLL   |
| 88  | P15056 | 178  | CGVTVRDSLKK   |
| 89  | P15056 | 443  | MKTLGR RDSSD  |
| 90  | Q5TAQ9 | 98   | NRVHDRSEEEE   |
| 91  | Q5TAQ9 | 122  | RVQRKRANRDQ   |
| 92  | Q5TAQ9 | 225  | WDWVR RQP VLD |
| 93  | Q96EY1 | 41   | GAWLSRKL SVP  |
| 94  | Q96EY1 | 64   | ALLTLRPGVSL   |
| 95  | Q96EY1 | 151  | SDEVKRKQYDA   |
| 96  | Q96EY1 | 277  | RSTCRRCGGRG   |
| 97  | P06746 | 149  | GDFEKRI PREE  |
| 98  | P06746 | 254  | EYPHRRIDIRL   |
| 99  | Q92997 | 113  | GIGDSRPPSFH   |
| 100 | Q92997 | 149  | ERPRR RDGPEH  |
| 101 | Q92997 | 168  | KGERRREP GGY  |
| 102 | Q92997 | 216  | SRLMR RHKRRR  |
| 103 | Q92997 | 221  | RHKRRRRKQKV   |
| 104 | Q60487 | 121  | CFFFERLESNN   |
| 105 | Q60487 | 133  | NTYRSRKYSSW   |
| 106 | Q54G21 | 194  | LENNQRVGS LF  |
| 107 | Q54G21 | 210  | SETPFRFV VGE  |
| 108 | Q9R1E0 | 29   | TWPLR PPEFNQ  |
| 109 | Q9R1E0 | 606  | GMFIERLD CDM  |
| 110 | Q13283 | 17   | GREFVRQYYTL   |
| 111 | Q13283 | 132  | HNDIFRYQDEV   |
| 112 | Q13283 | 247  | VQEDLRTFSWA   |
| 113 | Q13283 | 314  | NIPPQRGPRPI   |

|     |        |     |              |
|-----|--------|-----|--------------|
| 114 | P31943 | 75  | ALKKDRETMGH  |
| 115 | P31943 | 175 | KKHKEIRIGHRY |
| 116 | P04264 | 8   | RQFSSRSRGYRS |
| 117 | P04264 | 38  | SSSTRRSRGGGG |
| 118 | P04264 | 181 | VKSREREQIKS  |
| 119 | P04264 | 223 | VDTSTRTHNLE  |
| 120 | P04264 | 267 | MVEDYRNKYED  |
| 121 | P04264 | 277 | DEINKRTNAEN  |
| 122 | P08729 | 136 | SAKSSRLPDIF  |
| 123 | P08729 | 302 | HGDDLNRTRNE  |
| 124 | P02687 | 31  | FLPRHRDTGIL  |
| 125 | P02687 | 96  | NIVTPRTPPPS  |
| 126 | P15720 | 30  | RHGSPRHRDSG  |
| 127 | P15720 | 42  | LDSLGRFFGGD  |
| 128 | P25274 | 150 | QGTLSRLFKLG  |
| 129 | Q8IZS5 | 132 | LFDESROGEPQ  |
| 130 | Q8IZS5 | 195 | LEQEIIRSTSLH |
| 131 | P11940 | 265 | QIYVGRAQKKV  |
| 132 | Q9JMB7 | 80  | LSLAERGGRRR  |
| 133 | Q9JMB7 | 85  | RGGRRRDFHDL  |
| 134 | Q9JMB7 | 121 | STNHFRRLTSRP |
| 135 | Q9JMB7 | 174 | LFLPKRLQHKV  |
| 136 | Q86WR7 | 24  | PSCRLRAFSRG  |
| 137 | Q86WR7 | 40  | RSSSSRSRSFT  |
| 138 | Q86WR7 | 42  | SSSRSRSFTLD  |
| 139 | Q86WR7 | 172 | TPDPPRRELRA  |
| 140 | Q86WR7 | 234 | AARGPRSGDPG  |
| 141 | Q86WR7 | 269 | AREPRRTLSRA  |
| 142 | Q86WR7 | 273 | RRTLSRAAVSV  |
| 143 | P22626 | 38  | TEESLRNYEQ   |
| 144 | P22626 | 89  | HSIDGRVVEPK  |
| 145 | P51991 | 18  | DSGRRRRRRGE  |
| 146 | P51991 | 68  | DCVVMRDPQTK  |
| 147 | P51991 | 74  | DPQTKRSRFG   |
| 148 | P51991 | 246 | GNFGGRGGYGG  |
| 149 | Q99729 | 137 | HRLDGRVIDPK  |
| 150 | Q99729 | 171 | TEEKIREYFGE  |
| 151 | Q99729 | 321 | YGKSQRRGGHQ  |
| 152 | P14678 | 25  | ILQDGRIFIGT  |
| 153 | P14678 | 61  | SKQAEREEKRV  |
| 154 | P14678 | 65  | EREKRVLGLV   |
| 155 | P14678 | 132 | LAGPVRGVGGP  |
| 156 | Q14524 | 104 | GKTIFRFSATN  |
| 157 | Q14524 | 190 | AFTFLRDPWNW  |
| 158 | Q14524 | 383 | YQOTLRSAGKI  |
| 159 | Q14524 | 451 | EALTIRGVDTV  |
| 160 | P23246 | 358 | DDTPMRGRQLR  |
| 161 | P68363 | 79  | VIDEVRTGTYS  |
| 162 | P68363 | 123 | VLDRIKRLADQ  |
| 163 | P68363 | 214 | IYDICRRNLDI  |
| 164 | P68363 | 402 | LMYAKRAFVHW  |
| 165 | P07437 | 156 | LISKIREEYPD  |

|     |        |     |              |
|-----|--------|-----|--------------|
| 166 | P07437 | 320 | AVFRGRMSMKE  |
| 167 | Q86V81 | 58  | GPIRNRPAIAR  |
| 168 | Q86V81 | 71  | AGGGGRNRPAP  |
| 169 | Q86V81 | 141 | AVHYDRSGRSL  |
| 170 | Q86V81 | 190 | IDAQRPAQSV   |
| 171 | O08583 | 70  | AAGGGRNRPAP  |
| 172 | O08583 | 201 | RGGMTRNRGSG  |
| 173 | P39748 | 103 | AKRSEERRAEAE |
| 174 | P39748 | 129 | EKFTRKRLVKVT |
| 175 | P39748 | 262 | EEIVRRLDPNK  |
| 176 | P31269 | 235 | YLTRDRRYEVA  |
| 177 | P04049 | 215 | PSLTMRRMRES  |
| 178 | P04049 | 216 | SLTMRMRRESV  |
| 179 | P46783 | 124 | RGEADRD TYRR |
| 180 | P46783 | 153 | TEFQFRGGFGR  |
| 181 | O76922 | 80  | SEGDP RGSVRG |
| 182 | O76922 | 132 | TIYQYRVDFTP  |
| 183 | O76922 | 145 | EATRLRRSFLY  |
| 184 | O76922 | 221 | NLILRRAMEGL  |
| 185 | O76922 | 233 | LKLVSRYYYDP  |

**(6) Subset 6 (186 samples)**

| Sample # | Protein ID | Site | Sequences    |
|----------|------------|------|--------------|
| 1        | Q9NR22     | 100  | RTLTYRNSMYH  |
| 2        | Q9UBL3     | 300  | GRGAKRKQODG  |
| 3        | Q9UBL3     | 342  | NKDG YRYILAE |
| 4        | Q9UBL3     | 388  | LALHDRAPQLK  |
| 5        | Q92934     | 39   | SGKHHRQAPGL  |
| 6        | Q92934     | 70   | GAVEI RSRHSS |
| 7        | Q92934     | 98   | FRGRSR SAPPN |
| 8        | Q92934     | 161  | DRNLGRGSSAP  |
| 9        | Q7Q2B7     | 112  | SVFNLRTEDSS  |
| 10       | Q7Q2B7     | 140  | MQDFVRTSTYQ  |
| 11       | Q09472     | 202  | GAGRGRQNMQY  |
| 12       | Q09472     | 397  | HCASSRQIISH  |
| 13       | Q09472     | 568  | STTGIRKQWHE  |
| 14       | Q09472     | 603  | AALKDRRMENL  |
| 15       | Q09472     | 705  | NQMMPRITPQS  |
| 16       | Q09472     | 1356 | ESFPYRTKALF  |
| 17       | P03372     | 157  | PNSDNRRQGGR  |
| 18       | P03372     | 271  | KHKRQRDDGEG  |
| 19       | P03372     | 287  | SAGDMRAANLW  |
| 20       | P03372     | 335  | EYDPT RPFSEA |
| 21       | Q01844     | 292  | GPGENRSMGSP  |
| 22       | P22509     | 141  | DKIEYRAWNPF  |
| 23       | P22509     | 201  | VEFSHRSGRDL  |
| 24       | P22509     | 261  | AHTFLRNGGHF  |
| 25       | P22509     | 320  | VVG VYRPPPKA |
| 26       | P35637     | 218  | RGGRG RGGSGG |
| 27       | P35637     | 441  | MNFSWRNECNQ  |

|    |        |     |              |
|----|--------|-----|--------------|
| 28 | P03347 | 39  | IVWASRELERF  |
| 29 | P03347 | 43  | SRELERFVAVNP |
| 30 | P03347 | 76  | GSEELRSLYNT  |
| 31 | P03347 | 214 | AAEWDRVHPVH  |
| 32 | P03347 | 229 | APGQMRPRGS   |
| 33 | P03347 | 232 | QMREPRGSDIA  |
| 34 | P62805 | 20  | GAKRHRKVLRD  |
| 35 | P62805 | 93  | VYALKRQRTL   |
| 36 | P17096 | 81  | TTTTPGRKPRGR |
| 37 | P31942 | 55  | MDYQGRSTGEA  |
| 38 | P31942 | 104 | FYDPPRLLGQ   |
| 39 | P31942 | 110 | RLLGQRP GPYD |
| 40 | P31942 | 169 | DGFDDMRDGR   |
| 41 | O60506 | 130 | KALLERTGYTL  |
| 42 | O60506 | 171 | VGKIPRDLFED  |
| 43 | O60506 | 244 | SVANNRLFVGS  |
| 44 | O60506 | 304 | AAQARRRLMSG  |
| 45 | O60506 | 413 | PPDQKRKERKA  |
| 46 | O60506 | 478 | DYHNYRGGYED  |
| 47 | O60506 | 548 | QQQRGRGVRGA  |
| 48 | O60506 | 551 | RGRGVRGARGG  |
| 49 | Q07666 | 36  | RQTPSRQPPLP  |
| 50 | Q07666 | 159 | MKLKERVLIPV  |
| 51 | Q07666 | 348 | PAPRARTAGIQ  |
| 52 | Q07666 | 420 | DWNGTRPSLKA  |
| 53 | Q07666 | 429 | KAPPARPVKGA  |
| 54 | P08199 | 385 | EKPKGRDSKKV  |
| 55 | Q28165 | 76  | EEEEPRPRAPP  |
| 56 | Q28165 | 127 | IKARVREMEEE  |
| 57 | Q28165 | 251 | PKRTNRPGIST  |
| 58 | O75925 | 15  | MVMSLRVSELO  |
| 59 | O75925 | 201 | VQVQLRFCLSE  |
| 60 | O75925 | 245 | GVEPKRPSRPI  |
| 61 | O75925 | 298 | LLQRLRAKGIR  |
| 62 | O75925 | 309 | NPDHSRALIKE  |
| 63 | O75925 | 341 | PLGKMRLTIPC  |
| 64 | O75925 | 622 | SSNSLRSHSH   |
| 65 | Q96PU8 | 170 | EIKLKRAVEEV  |
| 66 | Q96PU8 | 319 | VATKVRRHDMR  |
| 67 | Q92804 | 403 | GYGGERGYRGR  |
| 68 | Q92804 | 408 | RGYRGRGGRGG  |
| 69 | P09867 | 14  | EPEQLRKLFIG  |
| 70 | P09867 | 55  | NTKRSRGFGFV  |
| 71 | P09867 | 92  | KRAVSRSDSOR  |
| 72 | P09867 | 232 | GFGGSRGGGGY  |
| 73 | O00267 | 310 | LKMIPRIDYDR  |
| 74 | O00267 | 365 | IFEGNRYSRKG  |
| 75 | O00267 | 484 | KVIAGRFEFEDT |
| 76 | O00267 | 733 | TESTARVELHS  |
| 77 | O00267 | 749 | SVDRQRLTTVG  |
| 78 | O00267 | 756 | TTVGSRRPGGM  |
| 79 | P69697 | 57  | RRQRRRPPQGS  |

|     |        |     |              |
|-----|--------|-----|--------------|
| 80  | Q15554 | 21  | GRRASRSSGRA  |
| 81  | Q15554 | 80  | DFRQIRDIMQA  |
| 82  | Q15554 | 223 | QOKMLRFLESH  |
| 83  | Q15554 | 277 | PARQLRNPPTT  |
| 84  | Q15554 | 332 | KNKRPRKDENE  |
| 85  | P15056 | 146 | PTDVARSNPKS  |
| 86  | P15056 | 252 | FCDFCRKLLFQ  |
| 87  | P15056 | 271 | YKFHQRCSTEV  |
| 88  | P15056 | 354 | ADEDHRNQFGQ  |
| 89  | P15056 | 437 | SEDRNRMKTLG  |
| 90  | Q5TAQ9 | 115 | EEEQPRRRVQR  |
| 91  | Q5TAQ9 | 168 | LGSSARFVYEA  |
| 92  | P06746 | 183 | CGSFRRGAESS  |
| 93  | P06746 | 283 | FNKNMRAHALE  |
| 94  | Q92997 | 39  | KGVLQRPSTYKF |
| 95  | Q92997 | 143 | LVSAQRERPRR  |
| 96  | Q92997 | 147 | QRERPRRRDGP  |
| 97  | Q92997 | 157 | PEHATRLNGTA  |
| 98  | Q92997 | 166 | TAKGERRREPG  |
| 99  | Q92997 | 222 | HKRRRRKQKVS  |
| 100 | Q92997 | 228 | KQKVSRIERSS  |
| 101 | Q60487 | 57  | GGFFLRIHPDG  |
| 102 | Q54G21 | 339 | NESNSRNNSHSN |
| 103 | Q54G21 | 631 | VEKENRMVTLK  |
| 104 | Q9R1E0 | 147 | LAGQPRKTSSS  |
| 105 | Q9R1E0 | 153 | KTSSSRRNAWG  |
| 106 | Q9R1E0 | 177 | SSAEKRLTLSQ  |
| 107 | Q9R1E0 | 211 | WKNSIRHNLSL  |
| 108 | Q13283 | 398 | KVLSNRPIMFR  |
| 109 | P31943 | 29  | ADEVQRFSSDC  |
| 110 | P31943 | 188 | IFKSSRAEVRT  |
| 111 | P04264 | 45  | GGGGGRFSSCG  |
| 112 | P04264 | 251 | KSDQSRLDSEL  |
| 113 | P04264 | 392 | HGDSVRNSKIE  |
| 114 | P08729 | 253 | SMDNSRSLDL   |
| 115 | P02687 | 23  | TMDHARHGFLP  |
| 116 | P02687 | 52  | RGAPKRGSGKD  |
| 117 | P02687 | 78  | KAQGHRPQDEN  |
| 118 | P02687 | 161 | GGRDSRSGSPM  |
| 119 | P15720 | 6   | MASQKRSSFRH  |
| 120 | P15720 | 32  | GSPRHRDSGLL  |
| 121 | P15720 | 63  | DIHAARASHVG  |
| 122 | P15720 | 73  | GSIPQRSQHGR  |
| 123 | P11940 | 41  | PILSIRVCRDM  |
| 124 | P11940 | 176 | GRFKSRKEREK  |
| 125 | P11940 | 179 | KSRKEREAEELG |
| 126 | P11940 | 272 | QKKVERQTELK  |
| 127 | P11940 | 309 | GIDDERLRKEF  |
| 128 | Q9JMB7 | 12  | ARARGRARGQE  |
| 129 | Q8CDG1 | 45  | AGPAGRGLVFR  |
| 130 | Q8CDG1 | 293 | ELKSQRKTDDA  |
| 131 | Q86WR7 | 28  | LRAFSRGGSL   |

|     |        |     |              |
|-----|--------|-----|--------------|
| 132 | Q86WR7 | 35  | GSLESRSSSSR  |
| 133 | Q86WR7 | 218 | PTSPFREGRPG  |
| 134 | Q86WR7 | 226 | RPGEWRTPAAR  |
| 135 | P22626 | 12  | TVPLERKKREK  |
| 136 | P22626 | 82  | AAMAARPHSID  |
| 137 | P22626 | 129 | EEHHLRDYFEE  |
| 138 | P22626 | 153 | QSGKKRGGFV   |
| 139 | P22626 | 190 | RKALSROEMQE  |
| 140 | P51991 | 17  | PDSGRRRRRRG  |
| 141 | P51991 | 76  | QTKRSRGGFV   |
| 142 | P51991 | 161 | EVMEDRQSGKK  |
| 143 | Q99729 | 110 | NTGRSRGGFI   |
| 144 | Q99729 | 133 | DQKEHRLDGRV  |
| 145 | P14678 | 49  | DCDEFRKIKPK  |
| 146 | P14678 | 181 | PPPMGRGAPP   |
| 147 | P14678 | 196 | PPPGMRPPMGP  |
| 148 | Q14524 | 8   | NFLLPBGTSSF  |
| 149 | Q14524 | 14  | GTSSFRFTRE   |
| 150 | Q14524 | 15  | TSSFRFTRES   |
| 151 | Q14524 | 122 | FHPIRRAAVKI  |
| 152 | P23246 | 236 | PKPPHRGGGEP  |
| 153 | P23246 | 286 | NLSLLRRPGEK  |
| 154 | P23246 | 296 | KTYTQRCRLFV  |
| 155 | P23246 | 360 | TPMRGRQLRVR  |
| 156 | P23246 | 363 | RGRQLRVRFAT  |
| 157 | P23246 | 376 | AALSVRNLSPY  |
| 158 | P68363 | 84  | RTGTYRQLFHP  |
| 159 | P68363 | 121 | DLVLDRIKLA   |
| 160 | P68363 | 156 | SLLMERLSVDY  |
| 161 | P68363 | 229 | YTNLNRLISQI  |
| 162 | P68363 | 422 | EFSEAREDMAA  |
| 163 | P07437 | 121 | VLDVVRKEAES  |
| 164 | P07437 | 251 | LNADLRKCLAVN |
| 165 | P07437 | 309 | DPRHGRYLTVA  |
| 166 | P07437 | 391 | TAMFRKAFH    |
| 167 | Q86V81 | 17  | IIKLNRSQGG   |
| 168 | Q86V81 | 23  | SQGGRRGGGRG  |
| 169 | Q86V81 | 27  | GRGGRRGRGRA  |
| 170 | Q86V81 | 38  | GSQGGRRGGGAQ |
| 171 | Q86V81 | 50  | AARVNRGGGPI  |
| 172 | Q86V81 | 56  | GGGPIRNRPAI  |
| 173 | O08583 | 47  | VQAAARVNRGG  |
| 174 | P39748 | 327 | RSGVKRLSKSR  |
| 175 | P31269 | 40  | LGQPPRQAATL  |
| 176 | P31269 | 204 | NWLHARSTRKK  |
| 177 | P31269 | 236 | LTRDRRYEVAR  |
| 178 | P04049 | 40  | QFGYQRRASDD  |
| 179 | P04049 | 41  | FGYQRRASDDG  |
| 180 | P04049 | 89  | KALKVRGLQPE  |
| 181 | P04049 | 191 | DWSNIRQLLLF  |
| 182 | P04049 | 254 | GSLSQRQRSTS  |
| 183 | P46783 | 95  | VPATLRRSRPE  |

|     |        |     |             |
|-----|--------|-----|-------------|
| 184 | P46783 | 103 | RPETGRPRPKG |
| 185 | P46783 | 129 | RDTYRRSAVPP |
| 186 | O76922 | 17  | GRGRGRKPNNV |

## (7) Subset 7 (185 samples)

| Sample # | Protein ID | Site | Sequences    |
|----------|------------|------|--------------|
| 1        | Q9NR22     | 8    | MKHSSRCLLLR  |
| 2        | Q9NR22     | 349  | DYLTVRRGEEI  |
| 3        | Q9NR22     | 350  | YLTVRRGEEIY  |
| 4        | Q9UBL3     | 398  | KISDDRLLTVVG |
| 5        | Q9UBL3     | 461  | FSYSWRSKKGT  |
| 6        | Q7Q2B7     | 206  | NNLTDRIIVIA  |
| 7        | Q7Q2B7     | 318  | DTFDIRICMAK  |
| 8        | Q7Q2B7     | 391  | HWYQVRCLLQT  |
| 9        | Q7Q2B7     | 417  | LAANQRQSYDV  |
| 10       | Q7Q2B7     | 535  | ISSTGRQQQQQ  |
| 11       | P11911     | 111  | NNILKRSCGTY  |
| 12       | Q09472     | 335  | ADPEKRKLIQQ  |
| 13       | Q09472     | 1252 | CTECGRKMHQI  |
| 14       | Q09472     | 1283 | KSARTRKENKF  |
| 15       | Q09472     | 1292 | KFSAKRLPSTR  |
| 16       | Q09472     | 1478 | KAVSERIVHDY  |
| 17       | P03372     | 151  | PPAFYRPNSDN  |
| 18       | P03372     | 164  | QGGRERLASTN  |
| 19       | P03372     | 263  | DRRGGRMLKHK  |
| 20       | P03372     | 352  | TNLADRELVHM  |
| 21       | P03372     | 363  | INWAKRVPGFV  |
| 22       | Q01844     | 268  | QOSSFRQDHPS  |
| 23       | Q01844     | 330  | GSAGERGGFNK  |
| 24       | Q01844     | 537  | QNFARTECNQ   |
| 25       | P22509     | 46   | FGGGGRGRGGG  |
| 26       | P22509     | 48   | GGGRGRGGGGG  |
| 27       | P22509     | 98   | MVEPHRHEGVF  |
| 28       | P22509     | 147  | AWNPFRSKLAA  |
| 29       | P22509     | 230  | HPHKYRMLIAM  |
| 30       | P35637     | 422  | GGGQQRAGDWK  |
| 31       | P03347     | 264  | GEIYKRWIILG  |
| 32       | P03347     | 286  | SILDIRQGPKE  |
| 33       | P03347     | 294  | PKEPFRDYVDR  |
| 34       | P03347     | 384  | QRGNFRNQRKM  |
| 35       | P68431     | 27   | ATKAARKSAPA  |
| 36       | P68431     | 53   | ALREIRRYQKS  |
| 37       | P17096     | 56   | VTPKRPGRGP   |
| 38       | P31942     | 84   | ERIGHRYIEIF  |
| 39       | P31942     | 90   | YIEIFRSSRSE  |
| 40       | P31942     | 135  | GSMYDRMRRGG  |
| 41       | P31942     | 138  | YDRMRGGDGY   |
| 42       | P31942     | 171  | FDDRMRDGRGM  |
| 43       | O60506     | 105  | KTYRQREKQGT  |

|    |        |     |               |
|----|--------|-----|---------------|
| 44 | O60506 | 416 | QKRKERKAQRQ   |
| 45 | O60506 | 420 | ERKAQRQAANK   |
| 46 | O60506 | 498 | VGARGRGGRGA   |
| 47 | O60506 | 512 | APSRGRGAAPP   |
| 48 | O60506 | 533 | GPGSARGVRGA   |
| 49 | Q07666 | 56  | SRGGARASPAT   |
| 50 | P08199 | 391 | DSKKVRAARTL   |
| 51 | P08199 | 458 | AEIDGRSVSLY   |
| 52 | Q28165 | 172 | MEADARSIYVG   |
| 53 | O75925 | 33  | RNKHGRKHELL   |
| 54 | O75925 | 62  | IKELYRRRFPQ   |
| 55 | O75925 | 64  | ELYRRRFPQKI   |
| 56 | O75925 | 479 | EPSAKRTCPSL   |
| 57 | Q96PU8 | 124 | CKIMVBRGK GSM |
| 58 | Q96PU8 | 163 | EDAQNRAEIKL   |
| 59 | Q96PU8 | 227 | AQAAPRIITGP   |
| 60 | Q92804 | 175 | YGEDNRGYGGS   |
| 61 | Q92804 | 383 | QCNEPRPEDSR   |
| 62 | Q92804 | 397 | GDFRGRGYGGE   |
| 63 | P09867 | 47  | DCVVMRDPNTK   |
| 64 | O00267 | 124 | RSGARRLQNLW   |
| 65 | O00267 | 280 | PKSWVRLKRG I  |
| 66 | O00267 | 283 | WVRLKRG IYKD  |
| 67 | O00267 | 315 | RIDYDRIKARM   |
| 68 | O00267 | 329 | DWFAKRKKFKR   |
| 69 | O00267 | 338 | KRPPQRLFDAE   |
| 70 | O00267 | 494 | TGLIVRVEENF   |
| 71 | O00267 | 577 | HQAVTRKKDNR   |
| 72 | O00267 | 813 | LHDGSRTPAQS   |
| 73 | Q15554 | 54  | EEAVNRWVLKF   |
| 74 | Q15554 | 154 | VVESSRKL VKE  |
| 75 | Q15554 | 330 | ALKNKRPRKDE   |
| 76 | Q15554 | 482 | YPFVNRTAVMI   |
| 77 | P15056 | 158 | QKPIV RVFLPN  |
| 78 | P15056 | 166 | LPNKQRTVVPA   |
| 79 | P15056 | 172 | TVVPARCGVTV   |
| 80 | P15056 | 389 | RDQGFRGDGGS   |
| 81 | P15056 | 424 | SPGPQERERKSS  |
| 82 | P15056 | 444 | KTLGRDRDSSDD  |
| 83 | Q5TAQ9 | 33  | GAEEGRETSSG   |
| 84 | Q5TAQ9 | 59  | DGGPNRTSTES   |
| 85 | Q5TAQ9 | 120 | RRRVQKRANR    |
| 86 | Q5TAQ9 | 184 | FVQRFRLQHGL   |
| 87 | Q5TAQ9 | 224 | VWDWVRRQPVL   |
| 88 | Q96EY1 | 18  | VVGT PRLPAIS  |
| 89 | Q96EY1 | 31  | GARPPREGVVG   |
| 90 | Q92997 | 148 | RERPRRRDGPE   |
| 91 | Q60487 | 15  | TAAAARREPGG   |
| 92 | Q60487 | 68  | RVDGVREKTD P  |
| 93 | Q54G21 | 12  | EEYSNRNAASS   |
| 94 | Q54G21 | 320 | VAKLGRATGFT   |
| 95 | Q54G21 | 672 | NVAQMRRQIID   |

|     |        |     |              |
|-----|--------|-----|--------------|
| 96  | Q54G21 | 759 | DEKNARKSDIE  |
| 97  | Q54G21 | 800 | KLDMVRIKKRN  |
| 98  | Q54G21 | 804 | VRIKKRNDDKV  |
| 99  | Q9R1E0 | 83  | SEDFARAPGCV  |
| 100 | Q9R1E0 | 324 | STISGRLLSPIM |
| 101 | Q13283 | 13  | PLLVGREFVRQ  |
| 102 | Q13283 | 63  | QKEIHRKVMSQ  |
| 103 | Q13283 | 320 | GPRPIREAGEQ  |
| 104 | P31943 | 44  | GAQGIIRFIYTR |
| 105 | P31943 | 116 | GFVRLRGLPFG  |
| 106 | P31943 | 150 | VDFQGRSTGEA  |
| 107 | P31943 | 206 | LMAMQRP GPYD |
| 108 | P31943 | 212 | PGPYDRPGAGR  |
| 109 | P31943 | 259 | GFGSDRFGRDL  |
| 110 | P04264 | 86  | ARGGGRGSGFG  |
| 111 | P08729 | 77  | LLAPLRRLDADP |
| 112 | P08729 | 86  | DPSLQVRVQEE  |
| 113 | P08729 | 149 | QIAGLRGQLEA  |
| 114 | P08729 | 167 | LEAELRSMQDV  |
| 115 | Q36736 | 53  | YEKFERMIKEH  |
| 116 | P02687 | 29  | HGFLPRHRDTG  |
| 117 | P02687 | 47  | FFGSDRGAPKR  |
| 118 | P02687 | 112 | GLSLSRFSWGA  |
| 119 | P15720 | 25  | TTDHARHGSPR  |
| 120 | P25274 | 43  | LDSIGRFFSSD  |
| 121 | Q8IZS5 | 105 | EEINPRQCATE  |
| 122 | Q8IZS5 | 123 | RIFYNRLTKLF  |
| 123 | Q8IZS5 | 224 | VIRSRYYREQ   |
| 124 | P11940 | 50  | DMITRRSLGYA  |
| 125 | P11940 | 290 | QDRITRYQGVN  |
| 126 | Q9JMB7 | 144 | PLMEARRLRSA  |
| 127 | Q9JMB7 | 187 | VFSQTRNGEHV  |
| 128 | Q9JMB7 | 218 | YNIIFRRLKI   |
| 129 | Q8CDG1 | 83  | LDTAFRPPSKR  |
| 130 | Q8CDG1 | 140 | SVGWSRMLGRG  |
| 131 | Q8CDG1 | 144 | SRMLGRGSSEV  |
| 132 | Q8CDG1 | 181 | ARDPPRLPQPP  |
| 133 | Q8CDG1 | 255 | ECKSMRFGMLK  |
| 134 | Q8CDG1 | 326 | YNVVFRRVMKL  |
| 135 | Q86WR7 | 189 | HPRLLRVPTP   |
| 136 | P22626 | 21  | EKEQFRKLF IG |
| 137 | P22626 | 54  | DCVVMRDPASK  |
| 138 | P22626 | 95  | VVEPKRAVARE  |
| 139 | P22626 | 200 | EVQSSRSRGGG  |
| 140 | P22626 | 266 | GYGGGRGGYGG  |
| 141 | P22626 | 325 | NFGGSRNMGGP  |
| 142 | P51991 | 21  | RRRRRGEEGH   |
| 143 | P51991 | 96  | AAMCARPHKVD  |
| 144 | P51991 | 214 | SAGSORGRGGG  |
| 145 | P51991 | 216 | GSQRGRGGGSG  |
| 146 | Q99729 | 108 | DPNTGRSRGFG  |
| 147 | Q99729 | 195 | KLNKRRGFVFI  |

|     |        |     |               |
|-----|--------|-----|---------------|
| 148 | Q99729 | 253 | RNRGNRGS GGG  |
| 149 | P14678 | 18  | IDYRMR CILQD  |
| 150 | P14678 | 172 | QYPPGRGGPPP   |
| 151 | Q14524 | 18  | FRRFTR E SLAA |
| 152 | Q14524 | 27  | AAIEKRMAEKQ   |
| 153 | Q14524 | 53  | EEEAPRPQLDL   |
| 154 | Q14524 | 121 | PFHPIRRRAVK   |
| 155 | Q14524 | 277 | FMGNLRHKCVR   |
| 156 | P23246 | 19  | GGFHRRGGGGG   |
| 157 | P23246 | 44  | GLNQNRGPMGP   |
| 158 | P23246 | 242 | GGGEP RGG RQH |
| 159 | P23246 | 245 | EPRGGRQHHP    |
| 160 | P23246 | 365 | RQLRVRFATHA   |
| 161 | P68363 | 64  | GKHVPRAVFVD   |
| 162 | P68363 | 373 | LAKVQRAVCML   |
| 163 | P68363 | 390 | AEAWARLDHKF   |
| 164 | P07437 | 46  | DLQLDRISVYY   |
| 165 | P07437 | 86  | FGQIFRPDNFV   |
| 166 | Q86V81 | 189 | QIDAQRPAQS    |
| 167 | O08583 | 58  | GPMRNRPAIAR   |
| 168 | P39748 | 73  | FYRTIRMMENG   |
| 169 | P39748 | 245 | GIGPKRAVDLI   |
| 170 | P39748 | 322 | SEERIRSGVKR   |
| 171 | P39748 | 339 | GSTQGRLLDDFF  |
| 172 | P31269 | 29  | ELSVGRYAPGT   |
| 173 | P31269 | 166 | SPPVDREKQPS   |
| 174 | P04049 | 67  | LPNKQRTVVNV   |
| 175 | P04049 | 164 | LLNGFR CQTCG  |
| 176 | P04049 | 275 | LPVDSRMIEDA   |
| 177 | P04049 | 331 | EKNKIRPRGQR   |
| 178 | P46783 | 98  | TLRRSRPETGR   |
| 179 | P46783 | 113 | GLEGERPARLT   |
| 180 | O76922 | 84  | PRGSVRGRRLI   |
| 181 | O76922 | 143 | DVEATRLRRSF   |
| 182 | O76922 | 220 | LNLILRRAMEG   |
| 183 | O76922 | 260 | YQTSIRQHEND   |
| 184 | O76922 | 278 | CHKVMRTETLY   |
| 185 | O76922 | 302 | QSTFKRAVMGM   |
