# Supplementary material for: iMethyl-PseAAC: Identification of Protein Methylation Sites via a Pseudo Amino Acid Composition Approach
Source: Hindawi journal article supplement (doi:10.1155/2014/947416), 2014-01-01
Supplement: f1 [file 947416.f1.zip]

**Online Supporting Information S8. Independent dataset for studying the Lys-methylation.** It contains 40 samples, of which 14 are positive and 26 negative. None of the samples listed here occurs in Online Supporting Information S4.

| Sample # | Protein ID | Site | Sequences                              |
|----------|------------|------|----------------------------------------|
| 1        | P62805     | 21   | AKRHRKVL <sup>R</sup> LDN              |
| 2        | P10651     | 5    | MMARTK <sup>Q</sup> TARK               |
| 3        | P10651     | 10   | K <sup>Q</sup> TARK <sup>K</sup> STGGK |
| 4        | P10651     | 15   | KSTGGK <sup>A</sup> PRK <sup>Q</sup>   |
| 5        | P10651     | 19   | GKAPR <sup>K</sup> QLASK               |
| 6        | P10651     | 24   | KQLAS <sup>K</sup> AARKA               |
| 7        | P10651     | 28   | SKAAR <sup>K</sup> AAPAT               |
| 8        | P10651     | 37   | ATGGV <sup>K</sup> KPHRY               |
| 9        | P10651     | 80   | IAQDF <sup>K</sup> TDLRF               |
| 10       | P68429     | 5    | MMARTK <sup>Q</sup> TARK               |
| 11       | P68429     | 10   | K <sup>Q</sup> TARK <sup>K</sup> STGGK |
| 12       | P68429     | 15   | KSTGGK <sup>A</sup> PRK <sup>Q</sup>   |
| 13       | P68429     | 19   | GKAPR <sup>K</sup> QLATK               |
| 14       | P68429     | 28   | TKAAR <sup>K</sup> SAPAT               |
| 15       | P62805     | 6    | MSGRG <sup>K</sup> GGKGL               |
| 16       | P62805     | 9    | RGKGG <sup>K</sup> GLGKG               |
| 17       | P62805     | 32   | IQGIT <sup>K</sup> PAIRR               |
| 18       | P62805     | 45   | RRGGV <sup>K</sup> RISGL               |
| 19       | P62805     | 60   | TRGVL <sup>K</sup> VFLEN               |
| 20       | P62805     | 78   | YTEHAK <sup>R</sup> KTVT               |
| 21       | P62805     | 80   | EHAKR <sup>K</sup> TVTAM               |
| 22       | P62805     | 92   | VVYAL <sup>K</sup> RQGR                |
| 23       | P10651     | 57   | IRRYQ <sup>K</sup> STELL               |
| 24       | P10651     | 65   | ELLIR <sup>K</sup> LPFQR               |
| 25       | P10651     | 116  | CAIHG <sup>K</sup> RVTIQ               |
| 26       | P10651     | 123  | VTIQP <sup>K</sup> DMQLA               |
| 27       | P68429     | 24   | KQLAT <sup>K</sup> AARKS               |
| 28       | P68429     | 37   | ATGGV <sup>K</sup> KPHRF               |
| 29       | P68429     | 38   | TGGV <sup>K</sup> KPHRF                |
| 30       | P68429     | 65   | ELLIR <sup>K</sup> LPFQR               |
| 31       | P68429     | 80   | IAQDF <sup>K</sup> TDLRF               |
| 32       | P68429     | 116  | CAIHAK <sup>R</sup> VTIM               |
| 33       | P68429     | 123  | VTIMP <sup>K</sup> DIQLA               |
| 34       | Q28009     | 299  | QIGI <sup>I</sup> KTN <sup>K</sup> KT  |
| 35       | Q28009     | 303  | IKTN <sup>K</sup> KTG <sup>Q</sup> PM  |
| 36       | Q28009     | 319  | DRETG <sup>K</sup> LKGEA               |
| 37       | Q28009     | 321  | ETG <sup>K</sup> LKGEATV               |
| 38       | Q28009     | 335  | DPPSA <sup>K</sup> AAIDW               |
| 39       | Q28009     | 352  | SGNPI <sup>K</sup> VSFAT               |
| 40       | Q28009     | 435  | ECN <sup>Q</sup> CKAP <sup>K</sup> PD  |
