# Supplementary material for: iMethyl-PseAAC: Identification of Protein Methylation Sites via a Pseudo Amino Acid Composition Approach
Source: Hindawi journal article supplement (doi:10.1155/2014/947416), 2014-01-01
Supplement: f1 [file 947416.f1.zip]

## Online Supporting Information S2. List of self-conflict samples in the benchmark dataset used in Hu et al. (Biopolymers, 2011, 95, 763-771)

### I. Arg-methylation dataset

(A) Of the  $(180 + 2171) = 2351$  samples in their learning dataset for Arg-methylation, the following 8 samples occur in both positive and negative subsets

| Pair # | Positive |      | Negative |      | Conflict sample |
|--------|----------|------|----------|------|-----------------|
|        | Protein  | Site | Protein  | Site |                 |
| 1      | Q92804   | 483  | Q92804   | 498  | GYGGDRGGYGG     |
| 2      | Q92804   | 483  | Q92804   | 505  | GYGGDRGGYGG     |
| 3      | Q92804   | 483  | Q92804   | 512  | GYGGDRGGYGG     |
| 4      | Q92804   | 483  | Q92804   | 519  | GYGGDRGGYGG     |
| 5      | P22509   | 28   | P35637   | 248  | GRGGRRGGRGG     |
| 6      | Q01844   | 596  | P35637   | 491  | GRGGDRGGFRG     |
| 7      | P09651   | 206  | P04256   | 206  | NFGGRRGGGFG     |
| 8      | P09651   | 225  | P04256   | 225  | GNFSGRGGFGG     |

(B) Of the  $(10 + 206) = 216$  samples in their testing dataset for Arg-methylation, no any sample occur in both positive and negative subsets

### II. Lys-methylation dataset

(A) Of the  $(262 + 2569) = 2831$  samples in their learning dataset for Lys-methylation, the following 60 samples occur in both positive and negative subsets

| Pair # | Positive |      | Negative |      | Conflict sample |
|--------|----------|------|----------|------|-----------------|
|        | Protein  | Site | Protein  | Site |                 |
| 1      | P00042   | 79   | P00043   | 80   | LENPKKYIPGT     |
| 2      | P00042   | 79   | P00046   | 78   | LENPKKYIPGT     |
| 3      | P00042   | 79   | P00048   | 78   | LENPKKYIPGT     |
| 4      | P02993   | 36   | P02994   | 36   | CGGIDKRTIEK     |
| 5      | O60814   | 109  | P40283   | 134  | PGELAKHAVSE     |
| 6      | P39476   | 61   | P61991   | 61   | LQMLEKQKK--     |
| 7      | P39476   | 63   | P61991   | 63   | MLEKQKK----     |
| 8      | P39476   | 64   | P61991   | 64   | LEKQKK-----     |
| 9      | O15819   | 5    | P07041   | 5    | -MARTKQTARK     |
| 10     | P61830   | 19   | P07041   | 19   | GKAPRKQLASK     |
| 11     | P61830   | 24   | P07041   | 24   | KQLASKAARKS     |
| 12     | P61830   | 28   | P07041   | 28   | SKAARKSAPST     |
| 13     | P02993   | 36   | P68104   | 36   | CGGIDKRTIEK     |
| 14     | P61830   | 37   | P07041   | 37   | STGGVKKPHRY     |

|    |        |     |        |     |             |
|----|--------|-----|--------|-----|-------------|
| 15 | P59226 | 19  | P08898 | 19  | GKAPRKQLATK |
| 16 | P59226 | 24  | P08898 | 24  | KQLATKAARKS |
| 17 | P59226 | 19  | P08903 | 19  | GKAPRKQLATK |
| 18 | P59226 | 24  | P08903 | 24  | KQLATKAARKS |
| 19 | P59226 | 37  | P08903 | 37  | ATGGVKKPHRF |
| 20 | P59226 | 24  | P68429 | 24  | KQLATKAARKS |
| 21 | P59226 | 37  | P68429 | 37  | ATGGVKKPHRF |
| 22 | O15819 | 5   | P68432 | 5   | -MARTKQTARK |
| 23 | P59226 | 19  | P68432 | 19  | GKAPRKQLATK |
| 24 | P59226 | 24  | P68432 | 24  | KQLATKAARKS |
| 25 | P59226 | 19  | P84229 | 19  | GKAPRKQLATK |
| 26 | P59226 | 24  | P84229 | 24  | KQLATKAARKS |
| 27 | P59226 | 19  | P84249 | 19  | GKAPRKQLATK |
| 28 | P59226 | 24  | P84249 | 24  | KQLATKAARKS |
| 29 | O15819 | 5   | Q16695 | 5   | -MARTKQTARK |
| 30 | P59226 | 10  | Q16695 | 10  | KQTARKSTGGK |
| 31 | P59226 | 19  | Q16695 | 19  | GKAPRKQLATK |
| 32 | P59226 | 19  | Q42681 | 19  | GKAPRKQLATK |
| 33 | P02993 | 36  | Q5VTE0 | 36  | CGGIDKRTIEK |
| 34 | O15819 | 5   | P10651 | 5   | -MARTKQTARK |
| 35 | P61830 | 19  | P10651 | 19  | GKAPRKQLASK |
| 36 | P02993 | 36  | Q71V39 | 36  | CGGIDKRTIEK |
| 37 | O60814 | 109 | Q9FFC0 | 129 | PGELAKHAVSE |
| 38 | O60814 | 109 | Q9LZT0 | 129 | PGELAKHAVSE |
| 39 | P02994 | 30  | P02993 | 30  | GHLIYKCGGID |
| 40 | P49949 | 101 | P00219 | 101 | AAIDVKPP--- |
| 41 | P61830 | 15  | P59226 | 15  | KSTGGKAPRKQ |
| 42 | P61830 | 80  | P59226 | 80  | IAQDFKTDLRF |
| 43 | P08898 | 80  | P59226 | 80  | IAQDFKTDLRF |
| 44 | P68429 | 15  | P59226 | 15  | KSTGGKAPRKQ |
| 45 | P82888 | 80  | P62787 | 80  | EHARRKTVTAM |
| 46 | P84229 | 15  | P59226 | 15  | KSTGGKAPRKQ |
| 47 | P84229 | 37  | P68432 | 37  | ATGGVKKPHRY |
| 48 | P84229 | 80  | P59226 | 80  | IAQDFKTDLRF |
| 49 | P84249 | 15  | P59226 | 15  | KSTGGKAPRKQ |
| 50 | P84249 | 38  | P68432 | 38  | TGGVKKPHRYR |
| 51 | P84249 | 80  | P59226 | 80  | IAQDFKTDLRF |
| 52 | Q42681 | 36  | P68432 | 37  | ATGGVKKPHRY |
| 53 | Q42681 | 37  | P68432 | 38  | TGGVKKPHRYR |
| 54 | Q5VTE0 | 55  | P02993 | 55  | GKGSFKYAWVL |
| 55 | P10651 | 37  | P68432 | 37  | ATGGVKKPHRY |
| 56 | Q71V39 | 55  | P02993 | 55  | GKGSFKYAWVL |
| 57 | Q9SE35 | 143 | Q9SE35 | 110 | RILSSKKSJSY |
| 58 | Q9SE35 | 165 | Q9SE35 | 110 | RILSSKKSJSY |
| 59 | Q9SE35 | 184 | Q9SE35 | 110 | RILSSKKSJSY |
| 60 | Q9SE35 | 222 | Q9SE35 | 110 | RILSSKKSJSY |

(B) Of the  $(48 + 243) = 291$  samples in their testing dataset for Lys-methylation, the following 5 samples occur in both positive and negative subsets

| Pair # | Positive |      | Negative |      | Conflict sample |
|--------|----------|------|----------|------|-----------------|
|        | Protein  | Site | Protein  | Site |                 |
| 1      | P59169   | 5    | P09988   | 5    | -MARTKQTARK     |
| 2      | P59169   | 19   | Q6LCW8   | 19   | GKAPRKQLATK     |
| 3      | P59169   | 19   | P50564   | 19   | GKAPRKQLATK     |
| 4      | Q6LCW8   | 37   | P59169   | 38   | TGGVVKPHRYR     |
| 5      | P50564   | 37   | P59169   | 38   | TGGVVKPHRYR     |
