# Supplementary material for: iMethyl-PseAAC: Identification of Protein Methylation Sites via a Pseudo Amino Acid Composition Approach
Source: Hindawi journal article supplement (doi:10.1155/2014/947416), 2014-01-01
Supplement: f1 [file 947416.f1.zip]

**Online Supporting Information S4. Benchmark dataset used for studying the Lys-methylation.** It contains 1,884 samples, of which 226 are positive and 1,518 negative. These data were extracted from UniProtKB/Swiss-Prot database (version UniProt release 2013\_06).

**(A) List of 226 positive Lys-methylation sites and sequence**

| Sequence # | Protein ID | Site | Sequences   |
|------------|------------|------|-------------|
| 1          | P05141     | 52   | ADKQYKGIIDC |
| 2          | Q9Y232     | 135  | PNNARKQISRS |
| 3          | P00042     | 61   | DANIKKAVEWS |
| 4          | P26358     | 70   | ETKLRKEELSE |
| 5          | O75530     | 66   | NAPGRKSWGKG |
| 6          | O75530     | 197  | AINELKFHPRD |
| 7          | O75530     | 268  | WRINSKRMNA  |
| 8          | O75530     | 284  | DYNPNKTNRPF |
| 9          | Q5VTE0     | 55   | GKGSFKYAWVL |
| 10         | Q5VTE0     | 165  | PPYSQKRYEEI |
| 11         | P0CE47     | 57   | NAPEEKARGIT |
| 12         | O75367     | 123  | RGSKGKLEAII |
| 13         | P62807     | 58   | TGISSKAMGIM |
| 14         | P68432     | 5    | MMARTKQTARK |
| 15         | P68432     | 10   | KQTARKSTGGK |
| 16         | P68432     | 28   | TKAARKSAPAT |
| 17         | P68432     | 37   | ATGGVKKPHRY |
| 18         | P68432     | 80   | IAQDFKTDLRF |
| 19         | P09988     | 15   | KSTGGKAPRKQ |
| 20         | P09988     | 28   | SKAARKAAPAT |
| 21         | P69150     | 28   | SKAARKSAPAT |
| 22         | P69150     | 37   | ATGGIKKPHRF |
| 23         | P59226     | 37   | ATGGVKKPHRF |
| 24         | O15819     | 10   | KQTARKSTGAK |
| 25         | O15819     | 28   | SKQAHKQTPVS |
| 26         | O15819     | 40   | SSGGVKKVHRF |
| 27         | O15819     | 83   | IAQEFKTDLRF |
| 28         | Q55BN9     | 28   | NKSSQKSFST  |
| 29         | Q55BN9     | 37   | STQGLKKTTRF |
| 30         | Q55BP0     | 37   | VNEVLKKTTRF |
| 31         | P59169     | 28   | TKAARKSAPTT |
| 32         | P59169     | 37   | TTGGVKKPHRY |
| 33         | P84249     | 28   | TKAARKSAPST |
| 34         | P84249     | 37   | STGGVKKPHRY |
| 35         | P84249     | 38   | TGGVKKPHRYR |
| 36         | P08898     | 28   | TKAARKSAPAS |
| 37         | P08898     | 37   | ASGGVKKPHRY |
| 38         | P61830     | 28   | SKAARKSAPST |
| 39         | P62803     | 21   | AKRHRKVLDRN |
| 40         | P04637     | 370  | HSSHLKSKKGQ |
| 41         | P04637     | 373  | HLKSKKGQSTS |
| 42         | P04637     | 382  | TSRHKKLMFKT |

|    |        |     |             |
|----|--------|-----|-------------|
| 43 | Q86L05 | 122 | LRQVPKLLGPG |
| 44 | Q7M1B9 | 105 | REIFDKVLAMA |
| 45 | P80322 | 20  | QISEFKMAFDM |
| 46 | P14909 | 203 | ISRDNKIILLS |
| 47 | P14909 | 385 | NEEVIKEGIQK |
| 48 | P39462 | 11  | LVEIGKPLSLQ |
| 49 | P39462 | 213 | AVEAAKRAGAD |
| 50 | P22498 | 116 | NENELKRLDEY |
| 51 | P22498 | 135 | YREIFKDLKSR |
| 52 | P22498 | 273 | QPLTDKDMEAV |
| 53 | P22498 | 311 | VRDDLKGRLDW |
| 54 | P22498 | 332 | VKRTEKGYVSL |
| 55 | P0C835 | 16  | KTPAGKEAELV |
| 56 | P80053 | 254 | GVINEKGIDVG |
| 57 | P80053 | 260 | GIDVGKAIEIK |
| 58 | P80053 | 372 | DEEAKKLIVDR |
| 59 | P80053 | 391 | YDYHQKKLEDH |
| 60 | P80053 | 392 | DYHQKKLEDHD |
| 61 | P13123 | 5   | MMVKVFKYKYG |
| 62 | P13123 | 7   | VKVKFKYKGEE |
| 63 | P61991 | 5   | MMATVFKYKYG |
| 64 | P61991 | 7   | ATVKFKYKGEE |
| 65 | P13125 | 7   | AKVRFKYKGEE |
| 66 | P13125 | 63  | LARAEKKKKKK |
| 67 | P13125 | 64  | ARAEKKKKKK  |
| 68 | P39476 | 61  | LQMLEKQKKKK |
| 69 | P39476 | 63  | MLEKQKKKKKK |
| 70 | P39476 | 64  | LEKQKKKKKKK |
| 71 | P26358 | 142 | TPRRSKSDGEA |
| 72 | P55907 | 30  | PVEPPKVLGIH |
| 73 | P81543 | 29  | PVENPKVLGIH |
| 74 | P81539 | 29  | YEPPTKLGIVG |
| 75 | P49949 | 29  | PVDPPKVLGIH |
| 76 | P49949 | 101 | AAIDVKPPPPP |
| 77 | P81542 | 30  | ADPPVKEKALG |
| 78 | P00219 | 29  | PVESPVKLVGH |
| 79 | O43524 | 46  | QASPAKPSGET |
| 80 | O43524 | 149 | SGQPRKCSSRR |
| 81 | O43524 | 230 | NEGTGKSSWWI |
| 82 | O43524 | 262 | SNKYTKSRGRA |
| 83 | O43524 | 271 | RAAKKKAALQT |
| 84 | O43524 | 290 | PSQLSKWPGSP |
| 85 | O43524 | 419 | FPYTTKGSGLG |
| 86 | Q08369 | 299 | CGLYMKLHGVP |
| 87 | P16403 | 34  | GGTPRKASGPP |
| 88 | P16403 | 187 | PKKAAKSAAKA |
| 89 | P10412 | 26  | KKKARKSAGAA |
| 90 | P16401 | 27  | KKATKKAAGAG |
| 91 | O75367 | 18  | TSRSAKAGVIF |
| 92 | P40283 | 4   | MMAPKAEKKP  |
| 93 | P62807 | 47  | VYKVLKQVHPD |
| 94 | P62807 | 109 | PGELAKHAVSE |

|     |        |     |             |
|-----|--------|-----|-------------|
| 95  | P68432 | 19  | GKAPRKQLATK |
| 96  | P68432 | 24  | KQLATKAARKS |
| 97  | P68432 | 57  | IRRYQKSTELL |
| 98  | P68432 | 65  | ELLIRKLPFOR |
| 99  | P68432 | 123 | VTIMPKDIQLA |
| 100 | Q42681 | 28  | TKAARKTPATG |
| 101 | P09988 | 19  | GKAPRKQLASK |
| 102 | P09988 | 24  | KQLASKAARKA |
| 103 | P69150 | 57  | IRKYQKSTDLL |
| 104 | P69150 | 80  | IAHEFKAELRF |
| 105 | O15819 | 19  | AKVPRKHIGSK |
| 106 | O15819 | 24  | KHIGSKQAHKQ |
| 107 | Q55BN9 | 19  | AKVPRKHLGNK |
| 108 | Q55BN9 | 24  | KHLGNKSSQKS |
| 109 | Q55BP0 | 19  | AKVPRKHLSSK |
| 110 | Q55BP0 | 24  | KHLSSKSSFPS |
| 111 | P61830 | 24  | KQLASKAARKS |
| 112 | Q41811 | 21  | RKRHRKVLDRN |
| 113 | O14979 | 161 | SWDTSKDLTE  |
| 114 | Q14103 | 119 | KDYFSKFGEVV |
| 115 | P16862 | 180 | LAYRMKTDTY  |
| 116 | O00159 | 383 | RDALAKAVYSR |
| 117 | P13538 | 36  | KPFDAKSSVJV |
| 118 | Q96RI1 | 220 | IQCKSKRLRKN |
| 119 | P04637 | 372 | SHLKSCKGQST |
| 120 | P11940 | 299 | VNLYVKNLDDG |
| 121 | P06400 | 810 | YISPLKSPYKI |
| 122 | P06400 | 860 | SDRVLKRSAEG |
| 123 | P0CX43 | 47  | DPQRDKRFSGS |
| 124 | P47914 | 5   | MMAKSKNHTTH |
| 125 | Q969Q0 | 53  | YGGQTKPIFRK |
| 126 | P0CX27 | 40  | LFAQGKRRYDR |
| 127 | P0CX27 | 55  | FGGQTKPVFHK |
| 128 | P02393 | 77  | KIGVIKVVRAL |
| 129 | P02393 | 88  | TGLGLKEAKDK |
| 130 | P0A7K2 | 82  | TGLGLKEAKDL |
| 131 | P07472 | 84  | TGLGLKEAKAA |
| 132 | Q12962 | 189 | SRSKSKDRKYT |
| 133 | Q04207 | 310 | TYETFKSIMKK |
| 134 | P84747 | 2   | PPPPPKVSPRW |
| 135 | Q53688 | 27  | NLWYFKDLGVS |
| 136 | Q53688 | 105 | LMDVLKMGKKS |
| 137 | Q53688 | 108 | VLKMGKSKYY  |
| 138 | Q53688 | 310 | ISESIKKIKAQ |
| 139 | Q53688 | 326 | FSYEVKRLASQ |
| 140 | Q53688 | 467 | EEWKNKVEEWH |
| 141 | Q53688 | 508 | FKERIKQHMIK |
| 142 | Q53688 | 513 | KQHMIKSVREA |
| 143 | Q53688 | 519 | SVREAKINTSW |
| 144 | Q53688 | 638 | MYLTYKLLSLR |
| 145 | E5KWG9 | 117 | AGGFTKTWSFP |
| 146 | B6A879 | 150 | VGDKTKPKLSA |

|     |        |     |             |
|-----|--------|-----|-------------|
| 147 | B6A879 | 235 | LPQIGKGHIVP |
| 148 | B6A879 | 405 | KAKLKKSNIDQ |
| 149 | B6A879 | 518 | FFDIVKNYMDA |
| 150 | B6A879 | 620 | LYNPGKEIYLK |
| 151 | B6A879 | 625 | KEIYLKSISEI |
| 152 | Q9L5X8 | 325 | SPFAGKEGKFV |
| 153 | Q9L5X8 | 394 | PEVIIKEEDGQ |
| 154 | Q6NC90 | 67  | ERLGGKVWVQG |
| 155 | Q6NC90 | 114 | YREAVKHRQAA |
| 156 | Q6NC90 | 129 | RLIRLKLKPG  |
| 157 | Q9I756 | 9   | VGIFYKLAGRG |
| 158 | D0ZRV8 | 216 | EAFWAKLDALV |
| 159 | Q6NEZ3 | 267 | VTEDNKASTSI |
| 160 | Q6NEZ3 | 440 | EFEIPKTLAPG |
| 161 | D1BQI7 | 3   | MMMYKYITIL  |
| 162 | D1BQI7 | 17  | GQIAQKLTATL |
| 163 | D1BQI7 | 63  | FQNPQKLEQAV |
| 164 | D1BQI7 | 95  | KALSRKNIRRV |
| 165 | D1BQI7 | 160 | YNDPEKTDYEL |
| 166 | D1BQI7 | 214 | GTHYDKPSFHH |
| 167 | Q9UKV3 | 654 | SSNSRKSLSPG |
| 168 | P18281 | 35  | NVTVKKVDRSS |
| 169 | P18281 | 72  | DVHVKKVDRGA |
| 170 | Q9SJU4 | 395 | EGMFVKGYTTY |
| 171 | Q9ZU52 | 387 | KGMFVKGYTTY |
| 172 | P62157 | 116 | TNLGEKLTDEE |
| 173 | P62152 | 95  | FRVFDKDGNGF |
| 174 | P11118 | 149 | KMMMSKKKKKK |
| 175 | P07463 | 116 | TNLGEKLTDEE |
| 176 | P04573 | 96  | ILRAFKVFDAN |
| 177 | P04573 | 117 | KFIMQKVGEEP |
| 178 | P00889 | 395 | EQGKAKNPWPN |
| 179 | P00044 | 78  | YLTNPKKYIPG |
| 180 | P00044 | 79  | LTNPKKYIPGT |
| 181 | P00063 | 80  | YLLNPKKYIPG |
| 182 | P00063 | 94  | VFPGLKKPQDR |
| 183 | P00078 | 4   | MMPPKARAPL  |
| 184 | P00078 | 83  | YLENPKKFMPG |
| 185 | P00077 | 4   | MMPPKAREPL  |
| 186 | P00043 | 79  | YLENPKKYIPG |
| 187 | P00076 | 85  | AFAGIKAKKDR |
| 188 | P00042 | 79  | LENPKKYIPGT |
| 189 | P00070 | 95  | VFPGLKKPQER |
| 190 | P00047 | 94  | AFGGLKKNKDR |
| 191 | P68105 | 36  | CGGIDKRTIEK |
| 192 | P68105 | 79  | DISLWKFETSK |
| 193 | P68105 | 318 | KNVSVKDVRG  |
| 194 | Q71V39 | 165 | PAYSEKRYDEI |
| 195 | P02993 | 79  | DIALWKFETAK |
| 196 | P02993 | 219 | WNIERKEGKAD |
| 197 | P02993 | 318 | KNVSVKELRRG |
| 198 | P02994 | 79  | DIALWKFETPK |

|     |        |      |                      |
|-----|--------|------|----------------------|
| 199 | Q96KQ7 | 185  | VHRAR <b>K</b> TMSKP |
| 200 | P53991 | 118  | IPPGT <b>K</b> INSGK |
| 201 | P53991 | 124  | INSGK <b>K</b> EVPTA |
| 202 | P07041 | 80   | IAQDF <b>K</b> SDLRF |
| 203 | P10587 | 128  | VINPY <b>K</b> QLPIY |
| 204 | P13538 | 131  | TVN <b>PYK</b> WLPVY |
| 205 | P13538 | 552  | TDTSF <b>K</b> NKLYD |
| 206 | P68696 | 104  | GVYNE <b>K</b> IQPGT |
| 207 | P11416 | 347  | LEQPD <b>K</b> VDMLQ |
| 208 | P27063 | 12   | ASVGF <b>K</b> AGVKK |
| 209 | P27064 | 14   | ASVGF <b>K</b> AGVKD |
| 210 | P04717 | 14   | AKVGF <b>K</b> AGVKD |
| 211 | P04992 | 14   | ASVGF <b>K</b> AGVKE |
| 212 | P0A7J7 | 4    | MMMA <b>KK</b> VQAYV |
| 213 | P0A7J7 | 40   | IMEF <b>C</b> KAFNAK |
| 214 | Q5SLP6 | 3    | MMMM <b>KK</b> VVAVV |
| 215 | P0CX53 | 4    | MMM <b>PPK</b> FPDNE |
| 216 | P0CX53 | 11   | DPNEV <b>K</b> YLYLR |
| 217 | P62986 | 98   | KMICR <b>K</b> CYARL |
| 218 | P55072 | 315  | APKRE <b>K</b> THGEV |
| 219 | P05547 | 142  | RGKF <b>I</b> KPTLKK |
| 220 | P05547 | 146  | IKPTL <b>K</b> KVSKY |
| 221 | O95785 | 1162 | PPTAR <b>K</b> MFPGL |
| 222 | B6A879 | 364  | NISSD <b>K</b> DGENY |
| 223 | B6A879 | 390  | GYSNR <b>K</b> EISIA |
| 224 | B6A879 | 400  | ACSGV <b>K</b> AKLKK |
| 225 | B6A879 | 474  | GIPME <b>K</b> IHLGY |
| 226 | B6A879 | 498  | TRQYT <b>K</b> NGPAL |

**(B) List of 1,518 negative Lys-methylation sites and sequence**

| Sequence # | Protein ID | Site | Sequences            |
|------------|------------|------|----------------------|
| 1          | P05141     | 49   | QITAD <b>K</b> QYKGI |
| 2          | P05141     | 94   | FAFKD <b>K</b> YKQIF |
| 3          | P05141     | 96   | FKDKY <b>K</b> QIFLG |
| 4          | P05141     | 105  | LGGVD <b>K</b> RTOFW |
| 5          | P05141     | 245  | MQSGR <b>K</b> GTDIM |
| 6          | P05141     | 272  | GKAFF <b>K</b> GAWSN |
| 7          | Q9Y232     | 73   | DKRKN <b>K</b> KGKTE |
| 8          | Q9Y232     | 74   | KRKN <b>K</b> KGKTEY |
| 9          | Q9Y232     | 157  | ALVIG <b>K</b> DHESK |
| 10         | Q9Y232     | 162  | KDHES <b>K</b> NSQLF |
| 11         | P00042     | 11   | KGSE <b>K</b> KGATLF |
| 12         | P00042     | 17   | GATLF <b>K</b> TRCLQ |
| 13         | P00042     | 48   | GRQSG <b>K</b> AEGYS |
| 14         | P00042     | 60   | TDANI <b>K</b> KAVEW |
| 15         | P26358     | 58   | LQTEI <b>K</b> NQLCD |
| 16         | P26358     | 83   | YLAKV <b>K</b> SLLNK |
| 17         | P26358     | 177  | AKGPA <b>K</b> RKPQE |
| 18         | P26358     | 198  | IKEED <b>K</b> DQDEK |

|    |        |     |               |
|----|--------|-----|---------------|
| 19 | Q5VTE0 | 41  | KRTIEKFEKEA   |
| 20 | Q5VTE0 | 129 | EAGISKNGQTR   |
| 21 | P0CE47 | 238 | ERGIKVGEEV    |
| 22 | O75367 | 117 | ELLAKKRGSKG   |
| 23 | P62807 | 12  | SAPAPKKGSKK   |
| 24 | P09988 | 123 | VTIQPKDMQLA   |
| 25 | P69150 | 19  | AKAPRKQLASK   |
| 26 | Q55BP0 | 30  | SSFPSKPVNEV   |
| 27 | Q55BP0 | 65  | DLLIKKLPFQR   |
| 28 | P61830 | 126 | QKKDIKLARRL   |
| 29 | P62803 | 32  | IQGITKPAIRR   |
| 30 | P04637 | 164 | AMAIYKQSQHM   |
| 31 | P04637 | 386 | KKLMFKTEGPD   |
| 32 | Q86L05 | 43  | KNYDTKKDKRF   |
| 33 | Q86L05 | 53  | FSGQIKIGTVT   |
| 34 | Q86L05 | 97  | IGPKNKKAIKK   |
| 35 | Q86L05 | 105 | IKKLSKKYDAF   |
| 36 | Q86L05 | 147 | EDMASKINDVK   |
| 37 | Q86L05 | 152 | KINDVKSTVKF   |
| 38 | P14909 | 34  | VEKTKIKIID    |
| 39 | P14909 | 80  | DELREKIAQYL   |
| 40 | P14909 | 94  | YGTDVKKEEVI   |
| 41 | P14909 | 105 | VTPGAKPALFL   |
| 42 | P14909 | 142 | KLLGGKPIYAN   |
| 43 | P14909 | 194 | PNDVKKIVDIS   |
| 44 | P14909 | 257 | GYIVAKREIIQ   |
| 45 | P14909 | 285 | QKAAVKAFDTF   |
| 46 | P14909 | 313 | YDELTKVKGVE   |
| 47 | P39462 | 136 | IVPHYKYMYKL   |
| 48 | P39462 | 263 | PKALAKQ GK YV |
| 49 | P22498 | 76  | QKMGLKIARLN   |
| 50 | P22498 | 138 | IFKDLKSRGLY   |
| 51 | P22498 | 256 | KSVSKKPVGII   |
| 52 | P22498 | 445 | RFGLLKVDYNT   |
| 53 | P0C835 | 53  | KYFRHKLPDDY   |
| 54 | P80053 | 16  | YTQQVKKLYKV   |
| 55 | P80053 | 54  | RGSDGKLTTFM   |
| 56 | P80053 | 170 | IKITGKVDFAV   |
| 57 | P13123 | 52  | EKDAPKELLDM   |
| 58 | P61991 | 40  | DEGGGKTGRGA   |
| 59 | P26358 | 284 | DEKDEKKHRSQ   |
| 60 | P26358 | 291 | HRSQPKDLAAK   |
| 61 | O75530 | 398 | VEDPHKAKCTT   |
| 62 | O75530 | 400 | DPHKAKCTTTLT  |
| 63 | Q5VTE0 | 371 | AHIACKFAELK   |
| 64 | P81542 | 20  | DHAGHKVYAPA   |
| 65 | P81542 | 32  | PPVKEKALGIH   |
| 66 | P00219 | 20  | DHSGHKIYGPV   |
| 67 | O43524 | 242 | NPDGGKSGKAP   |
| 68 | Q08369 | 311 | PLAMRKEGIQT   |
| 69 | P16403 | 110 | FKLNKKAASGE   |
| 70 | P16403 | 117 | ASGEAKPKVKK   |

|     |        |     |              |
|-----|--------|-----|--------------|
| 71  | P16403 | 130 | GTKPKKPVGAA  |
| 72  | P16403 | 139 | AAKKPKKAAGG  |
| 73  | P10412 | 22  | KTPVKKKARKS  |
| 74  | P10412 | 34  | GAAKRKASGPP  |
| 75  | P10412 | 121 | AKPKAKKAGAA  |
| 76  | P10412 | 136 | PAGAAKKPKKA  |
| 77  | P10412 | 148 | GAATPKKSAKK  |
| 78  | P16401 | 21  | EKSPAkkKATK  |
| 79  | P16401 | 23  | SPAkkKATKKA  |
| 80  | P16401 | 35  | GAGAAkRKATG  |
| 81  | P16401 | 154 | KKAVkKTPKKA  |
| 82  | O75367 | 157 | KKGARkSKKKQ  |
| 83  | O75367 | 236 | NTLEkKGGKEF  |
| 84  | P40283 | 13  | KPAEKkPASEK  |
| 85  | P40283 | 33  | KAPAEkKPKAG  |
| 86  | P40283 | 52  | AGGDkKKKMKK  |
| 87  | Q41811 | 60  | TRGVRkIFLEN  |
| 88  | O14979 | 322 | QQQQkKGGRGA  |
| 89  | Q14103 | 231 | CFITfKEEEPv  |
| 90  | P16862 | 76  | VEAHLkELNSI  |
| 91  | P16862 | 197 | LNRpQKAIaVM  |
| 92  | P16862 | 525 | AVNENkIVRKP  |
| 93  | P16862 | 548 | EAIQAKDFKRA  |
| 94  | O00159 | 24  | PHRPCKLALGS  |
| 95  | O00159 | 274 | KGQCAkVSSIN  |
| 96  | O00159 | 285 | DKSDWkVVRKA  |
| 97  | O00159 | 486 | DLVEEKFKGII  |
| 98  | O00159 | 488 | VEEKfKGIISI  |
| 99  | O00159 | 595 | ELSDkKRPETV  |
| 100 | O00159 | 605 | VATQfKMSLLQ  |
| 101 | O00159 | 618 | EILQSkEPAYV  |
| 102 | P13538 | 85  | SMNPPkYDKIE  |
| 103 | P13538 | 207 | ASGEKkKEEQS  |
| 104 | P13538 | 260 | FGATGkLASAD  |
| 105 | P13538 | 354 | KTAIYkLTGAV  |
| 106 | Q96RI1 | 36  | SMKPAkGVLTE  |
| 107 | Q96RI1 | 196 | ECRLRkCKEMG  |
| 108 | Q96RI1 | 251 | VTSTTKSCREK  |
| 109 | Q96RI1 | 289 | TNKILkKEEFSa |
| 110 | Q96RI1 | 335 | QIALLkGSAVE  |
| 111 | Q96RI1 | 474 | RVNDHkFTPLL  |
| 112 | P11940 | 30  | AMLYEKfSPAG  |
| 113 | P11940 | 113 | KSIDNkALYDT  |
| 114 | P11940 | 157 | ERAIEkMNGML  |
| 115 | P11940 | 277 | RQTELkRKFEQ  |
| 116 | P06400 | 8   | PKTPRkTAATA  |
| 117 | P06400 | 80  | WLTWEkVSSVD  |
| 118 | P06400 | 122 | FTELOkNIEIS  |
| 119 | P06400 | 143 | IDTSTkVDNAM  |
| 120 | P06400 | 164 | FALFSkLERTC  |
| 121 | P06400 | 228 | LDYFIkLSPPM  |
| 122 | P06400 | 327 | EElYlKnkDLD  |

|     |        |     |                               |
|-----|--------|-----|-------------------------------|
| 123 | P06400 | 341 | FLDHD <b>K</b> TLQTD          |
| 124 | P0CX43 | 91  | SVDDL <b>K</b> KLNKN          |
| 125 | P47914 | 47  | NMRFA <b>K</b> KHNKK          |
| 126 | P47914 | 55  | NKKGL <b>K</b> KMQAN          |
| 127 | Q969Q0 | 6   | MVNVP <b>K</b> TRRTF          |
| 128 | Q969Q0 | 58  | KPIFR <b>K</b> KAKTT          |
| 129 | Q969Q0 | 59  | PIFR <b>K</b> KAKTTK          |
| 130 | Q969Q0 | 89  | AIKR <b>C</b> KHFELG          |
| 131 | P0CX27 | 76  | RLECV <b>K</b> CKTRA          |
| 132 | P0CX27 | 89  | TLKR <b>C</b> KHFELG          |
| 133 | P02393 | 91  | GLKEA <b>K</b> DKVDG          |
| 134 | P02393 | 114 | EAE <b>E</b> A <b>K</b> KQLVE |
| 135 | P07472 | 98  | APATL <b>K</b> EGMSK          |
| 136 | Q12962 | 212 | YGINV <b>K</b> KPHYF          |
| 137 | Q04207 | 122 | GIQCV <b>K</b> KRDLE          |
| 138 | Q04207 | 221 | CDKV <b>Q</b> KEDIEV          |
| 139 | Q04207 | 301 | HRIE <b>E</b> KRKRTY          |
| 140 | Q04207 | 425 | SAPVP <b>K</b> STQAG          |
| 141 | Q53688 | 12  | RLQLN <b>K</b> NFNFG          |
| 142 | E5KWG9 | 29  | TASHD <b>K</b> VWPIL          |
| 143 | E5KWG9 | 135 | VSELV <b>K</b> LPSIP          |
| 144 | E5KWG9 | 278 | I <b>A</b> STP <b>K</b> GEYHK |
| 145 | E5KWG9 | 283 | KGEY <b>H</b> KIASYY          |
| 146 | E5KWG9 | 292 | YYQW <b>Q</b> KRVEKL          |
| 147 | B6A879 | 93  | TTADV <b>K</b> PTENI          |
| 148 | B6A879 | 173 | DGGGS <b>K</b> EEERG          |
| 149 | B6A879 | 290 | LREL <b>Q</b> KKAHAM          |
| 150 | Q9L5X8 | 126 | FAHGL <b>K</b> PIVVI          |
| 151 | Q9L5X8 | 438 | MAPDG <b>K</b> GRVRM          |
| 152 | Q6NC90 | 9   | HIDPT <b>K</b> EVFAQ          |
| 153 | Q6NEZ3 | 66  | YKFN <b>Q</b> KSNFSA          |
| 154 | Q6NEZ3 | 108 | GYK <b>N</b> A <b>K</b> LTKSS |
| 155 | Q6NEZ3 | 120 | RINVG <b>K</b> NVKLD          |
| 156 | Q6NEZ3 | 178 | TFIPE <b>K</b> TILTN          |
| 157 | Q6NEZ3 | 341 | VMPGE <b>K</b> VSVSA          |
| 158 | Q9UKV3 | 103 | LVKRL <b>K</b> GALML          |
| 159 | P18281 | 16  | QGAAL <b>K</b> HAETV          |
| 160 | P18281 | 34  | ENVTV <b>K</b> KVDRS          |
| 161 | P18281 | 52  | K <b>P</b> HEL <b>K</b> HAETV |
| 162 | Q9SJU4 | 246 | YDVAE <b>K</b> VWAEV          |
| 163 | Q9ZU52 | 120 | LYQST <b>K</b> DGKTF          |
| 164 | Q9ZU52 | 123 | STKDG <b>K</b> TFVDC          |
| 165 | Q9ZU52 | 142 | GIKVD <b>K</b> GLSPL          |
| 166 | Q9ZU52 | 171 | SAEY <b>Y</b> KQGARF          |
| 167 | P62157 | 22  | FSLFD <b>K</b> DGDGT          |
| 168 | P11118 | 76  | TLMSR <b>K</b> MHDTD          |
| 169 | P07463 | 76  | SLMAR <b>K</b> MKEQD          |
| 170 | P04573 | 43  | MDMLT <b>K</b> LGQTY          |
| 171 | P04573 | 133 | VEEAM <b>K</b> EADED          |
| 172 | P00889 | 208 | MDLIA <b>K</b> LPCVA          |
| 173 | P00063 | 16  | PAAGE <b>K</b> IFKTK          |
| 174 | P00063 | 107 | LIAYL <b>K</b> QSTAA          |



|     |        |     |              |
|-----|--------|-----|--------------|
| 175 | P00078 | 19  | AARGEKLFKGR  |
| 176 | P00077 | 19  | AAKGEKIFKGR  |
| 177 | P00077 | 22  | GEKIFKGRAAQ  |
| 178 | P00077 | 98  | FAGIKKPQERA  |
| 179 | P00043 | 60  | YTDANKKKGVE  |
| 180 | P00076 | 7   | DAERGGKLFES  |
| 181 | P00076 | 65  | EETLHKFLENP  |
| 182 | P00076 | 78  | YVPGTKMAFAG  |
| 183 | P00047 | 13  | PGDASKGANLF  |
| 184 | P00047 | 97  | GLKKNKDRNDL  |
| 185 | Q71V39 | 179 | VSAYIKKIGYN  |
| 186 | P02993 | 172 | FEEIKKEVSAY  |
| 187 | P02994 | 177 | TSNFIKKVGYN  |
| 188 | P02994 | 217 | WEKETKAGVVK  |
| 189 | Q96KQ7 | 139 | MTGAGKSPPSV  |
| 190 | P53991 | 49  | TTDMSKRTVPT  |
| 191 | P53991 | 55  | RTVPTKLEEGE  |
| 192 | P53991 | 69  | NTYSNKAPFKA  |
| 193 | P53991 | 81  | VRSVEKITGPK  |
| 194 | P53991 | 164 | DPETGKEDPAK  |
| 195 | P11416 | 94  | FVCQDKSSGYH  |
| 196 | P11416 | 166 | DRNKKKKEAPK  |
| 197 | P11416 | 360 | LLEALKVYVRK  |
| 198 | P27064 | 227 | AEAIFKSQAET  |
| 199 | P0A7J7 | 92  | KSGSGKPNKDK  |
| 200 | Q5SLP6 | 9   | VVAVVKLQLPA  |
| 201 | Q5SLP6 | 16  | QLPAGKATPAP  |
| 202 | Q5SLP6 | 70  | F'TFVTKTPPAS |
| 203 | P0CX53 | 41  | GLSPKKVGEDI  |
| 204 | P62986 | 114 | NCRKKKCGHTN  |
| 205 | P55072 | 20  | AILKQKNRPNR  |
| 206 | P55072 | 190 | EGEPIKREDEE  |
| 207 | P55072 | 211 | IGGCRKQLAQI  |
| 208 | P55072 | 231 | HPALFKAIGVK  |
| 209 | P05547 | 21  | DIDRKKAEVRK  |
| 210 | P05547 | 26  | KAEVKRLEEQ   |
| 211 | P05547 | 46  | MTPERKKKLRL  |
| 212 | O95785 | 54  | YLPVTKEGPRD  |
| 213 | O95785 | 128 | PRLLEKHAQGR  |
| 214 | O95785 | 277 | CSIYFKQKEHL  |
| 215 | O95785 | 517 | DFPLSKPLLHG  |
| 216 | O95785 | 702 | KHEERKCPYCP  |
| 217 | O95785 | 754 | FSFQKKKKVA   |
| 218 | P05141 | 10  | AVSFAKDFLAG  |
| 219 | P26358 | 160 | PRITRKRSTRQT |
| 220 | P26358 | 179 | GPAKRKPQEES  |
| 221 | P26358 | 203 | KDQDEKRRRVT  |
| 222 | O75530 | 89  | CVNSLKEDHNQ  |
| 223 | O75530 | 184 | TMQCIKHVVGH  |
| 224 | O75530 | 293 | PFISQKIHFDP  |
| 225 | O75530 | 322 | DLILSKSCENA  |
| 226 | Q5VTE0 | 146 | YTLGVKQLIVG  |

|     |        |     |             |
|-----|--------|-----|-------------|
| 227 | Q5VTE0 | 179 | VSTYIKKIGYN |
| 228 | Q5VTE0 | 215 | WFKGWKVTRKD |
| 229 | Q5VTE0 | 255 | LQDVYKIGGIG |
| 230 | P0CE47 | 249 | EIVGIKETQKS |
| 231 | P0CE47 | 300 | KPGTIKPHTKF |
| 232 | P0CE47 | 304 | IKPHTKFESEV |
| 233 | P0CE47 | 314 | VYILSKDEGGR |
| 234 | O75367 | 8   | SRGGKKKSTKT |
| 235 | P62807 | 13  | APAPKKGSKKA |
| 236 | P62807 | 24  | VTKAQKKDGKK |
| 237 | P62807 | 29  | KKDGKKRKRSR |
| 238 | P62807 | 31  | DGKKRKRSRKE |
| 239 | P62807 | 86  | LAHYNKRSTIT |
| 240 | Q55BN9 | 64  | SELLIKKLPFQ |
| 241 | Q55BP0 | 64  | SDLLIKKLPFQ |
| 242 | P62803 | 80  | EHAKRKTVTAM |
| 243 | Q86L05 | 90  | DIEALKKIGPK |
| 244 | Q86L05 | 95  | KKIGPKNKKAI |
| 245 | Q7M1B9 | 18  | AEKVLKSKTPV |
| 246 | P14909 | 36  | KTKKIKIIDFG |
| 247 | P14909 | 263 | REIIQKMGILA |
| 248 | P14909 | 301 | MVSLFKKRRDV |
| 249 | P14909 | 315 | ELTKVKGVEVS |
| 250 | P14909 | 321 | GVEVSKPNGAF |
| 251 | P22498 | 72  | HDNAQKMGLKI |
| 252 | P22498 | 102 | NFDESKQDVTE |
| 253 | Q9Y232 | 204 | PKSPVKSRTAV |
| 254 | Q9Y232 | 348 | DIVVRKQDGFT |
| 255 | Q9Y232 | 360 | ILLSTKSENN  |
| 256 | P80053 | 20  | VKKLYKVGELL |
| 257 | P80053 | 97  | MIMTWKNSLLL |
| 258 | P80053 | 109 | PYGGGKGGVRV |
| 259 | P80053 | 137 | IQAIYKYLSE  |
| 260 | P80053 | 313 | PKVKAKLIVEG |
| 261 | P61991 | 21  | DISKIKKVWRV |
| 262 | P26358 | 302 | RRPEEKEPEKV |
| 263 | O75530 | 335 | CWKPGKMEDDI |
| 264 | O75530 | 344 | DIDKIKPSESN |
| 265 | Q5VTE0 | 376 | KFAELKEKIDR |
| 266 | P55907 | 74  | HPASEKKADPV |
| 267 | P81543 | 20  | THEGHKVYGPV |
| 268 | P49949 | 20  | EHQGHKVYGPV |
| 269 | O43524 | 195 | CVPYFKDKGDS |
| 270 | Q08369 | 328 | NLNKSKTPAGP |
| 271 | Q08369 | 402 | SAVCSKLSPQG |
| 272 | P10412 | 17  | PAPAEKTPVKK |
| 273 | P10412 | 127 | KAGAAKAKKPA |
| 274 | P16401 | 22  | KSPAKKKATKK |
| 275 | P16401 | 26  | KKKATKKAAGA |
| 276 | P16401 | 37  | GAAKRKATGPP |
| 277 | P16401 | 143 | TPKKAKKAAGA |
| 278 | P16401 | 150 | AAGAKKAVKKT |

|     |        |     |             |
|-----|--------|-----|-------------|
| 279 | O75367 | 235 | GNTLEKKGGE  |
| 280 | P40283 | 43  | GKKLPKEAGAG |
| 281 | P40283 | 111 | LARYNKKPTIT |
| 282 | Q41811 | 17  | GKGARKRHRKV |
| 283 | O14979 | 76  | GGAAIKGRRR  |
| 284 | O14979 | 142 | KINASKNQDD  |
| 285 | O14979 | 149 | QQDDGKMFIGG |
| 286 | Q14103 | 67  | ESEGAKIDASK |
| 287 | Q14103 | 111 | WDTTKDLKDY  |
| 288 | Q14103 | 129 | VDCTLKLDPIT |
| 289 | Q14103 | 146 | GFVLFKESESV |
| 290 | Q14103 | 176 | RAKAMKTKEPV |
| 291 | Q14103 | 178 | KAMKTKEPVKK |
| 292 | Q14103 | 255 | SKCEIKVAMSK |
| 293 | P16862 | 69  | DEKINKNVEAH |
| 294 | P16862 | 323 | IEELLKTNRIS |
| 295 | P16862 | 336 | QYERMKHLNIC |
| 296 | P16862 | 536 | LMESVKLTKAV |
| 297 | P16862 | 539 | SVKLTKAVAEA |
| 298 | P16862 | 588 | KDKRLKIAIVN |
| 299 | O00159 | 527 | HFLTHKLADQR |
| 300 | P13538 | 370 | LKFKQKQREEQ |
| 301 | Q96RI1 | 132 | SAGRIKGDEL  |
| 302 | Q96RI1 | 172 | KNAVYKCKNGG |
| 303 | Q96RI1 | 353 | EIFNKKLPSGH |
| 304 | Q96RI1 | 434 | LQKLCKIHQPE |
| 305 | P11940 | 104 | GNIFIKNLDKS |
| 306 | P11940 | 213 | KDLFGKFGPAL |
| 307 | P11940 | 254 | DEMNGKELNGK |
| 308 | P06400 | 65  | LCQKLKIPDHV |
| 309 | P06400 | 130 | EISVHKFFNLL |
| 310 | P06400 | 192 | SALVVKVSWIT |
| 311 | P06400 | 279 | IEVLCKEHECN |
| 312 | P06400 | 319 | VENLSKRYEEI |
| 313 | P06400 | 427 | IGYIFKEKFAK |
| 314 | P06400 | 429 | YIFKEKFAKAV |
| 315 | Q86L05 | 156 | VKSTVKFQLKK |
| 316 | Q86L05 | 207 | KTLYVKTSMGP |
| 317 | P0CX43 | 39  | LQVGLKNYDPQ |
| 318 | P0CX43 | 97  | KLNKNKLIK   |
| 319 | P0CX43 | 98  | LNKNKLIK    |
| 320 | P0CX43 | 102 | KKLIKLSK    |
| 321 | P47914 | 22  | HRNGIKKPRSQ |
| 322 | P47914 | 23  | RNGIKKPRSQR |
| 323 | P47914 | 48  | MRFKAKHNKKG |
| 324 | P47914 | 92  | KGVSRKLDRLA |
| 325 | P47914 | 124 | CRPKAKAKAKA |
| 326 | P47914 | 149 | PAQAPKRTQAP |
| 327 | Q969Q0 | 44  | RRYDRKQSGYG |
| 328 | Q969Q0 | 100 | GDKKRKQVIO  |
| 329 | P0CX27 | 78  | ECVKCKTRAQL |
| 330 | P02393 | 6   | MSSITKEQVVE |

|     |        |     |             |
|-----|--------|-----|-------------|
| 331 | P02393 | 72  | AAGANKIGVIK |
| 332 | P0A7K2 | 30  | SAMEEKFGVSA |
| 333 | P0A7K2 | 109 | AEALKKALEEA |
| 334 | P07472 | 110 | DGDEAKTKLEE |
| 335 | Q12962 | 42  | TAAENKASPAG |
| 336 | Q12962 | 213 | GINVKKPHYFT |
| 337 | Q04207 | 56  | STDTTKTHPTI |
| 338 | Q04207 | 93  | HELVGKDCRDG |
| 339 | Q53688 | 185 | TLMSWKNPPSY |
| 340 | Q53688 | 417 | DLRYYKISPDQ |
| 341 | E5KWG9 | 296 | QKRVEKLLRSO |
| 342 | B6A879 | 11  | TYTSSKAMSDI |
| 343 | B6A879 | 83  | ADEINKIGNPT |
| 344 | B6A879 | 374 | YVLLIKELRSA |
| 345 | B6A879 | 552 | LFSEAKGHFIS |
| 346 | Q9L5X8 | 119 | RFVTQKAFAHG |
| 347 | Q9L5X8 | 287 | GLGELKISDTI |
| 348 | Q9L5X8 | 341 | LERLEKELVHN |
| 349 | D0ZRV8 | 13  | LIELVKKVNRN |
| 350 | D0ZRV8 | 194 | WKAQQKMNEQR |
| 351 | Q6NEZ3 | 80  | MPESVKAGTGF |
| 352 | Q6NEZ3 | 105 | NLSGYKNAKLT |
| 353 | Q6NEZ3 | 111 | NAKLTKSSIRI |
| 354 | Q6NEZ3 | 202 | TTNADKPFATV |
| 355 | Q6NEZ3 | 369 | APEDVKYIDGT |
| 356 | Q6NEZ3 | 407 | WKNESKKNES  |
| 357 | Q6NEZ3 | 461 | YSNSLKDLVSI |
| 358 | D1BQI7 | 38  | YGRQLKTRIPP |
| 359 | Q9UKV3 | 143 | KOYLEKQOELL |
| 360 | Q9UKV3 | 223 | DEKPRKGERRS |
| 361 | Q9UKV3 | 315 | EIPRVKPEEMM |
| 362 | P18281 | 59  | AETVDKSGPAI |
| 363 | Q9SJU4 | 15  | KASPVKSDWVK |
| 364 | Q9SJU4 | 20  | KSDWVKGQSLI |
| 365 | Q9SJU4 | 131 | STTDGKKMVDV |
| 366 | Q9SJU4 | 132 | TTDGKKMVDVL |
| 367 | Q9SJU4 | 348 | QNTCLKTWGK  |
| 368 | Q9ZU52 | 271 | PGAEHKNKASP |
| 369 | Q9ZU52 | 348 | QGKPEKIEASQ |
| 370 | P62157 | 14  | QIAEFKEAFSL |
| 371 | P07463 | 14  | QIAEFKEAFAL |
| 372 | P07463 | 22  | FALFDKDGDT  |
| 373 | P07463 | 78  | MARKMKEQDSE |
| 374 | P04573 | 67  | GPKGDKKNIGP |
| 375 | P04573 | 68  | PKGDKKNIGPE |
| 376 | P04573 | 112 | DFDEFKFIMQK |
| 377 | P00889 | 14  | RLFGAKNASCL |
| 378 | P00889 | 34  | SSTNLKDILAD |
| 379 | P00889 | 233 | GAIDSKLDWSH |
| 380 | P00889 | 317 | LTQLQKEVGKD |
| 381 | P00889 | 327 | DVSDEKLRDYI |
| 382 | P00889 | 366 | REFALKHLPHD |

|     |        |     |              |
|-----|--------|-----|--------------|
| 383 | P00889 | 393 | LLEQGKAKNPW  |
| 384 | P00063 | 21  | KIFKTCAQCH   |
| 385 | P00078 | 61  | GYAYSKANAES  |
| 386 | P00078 | 97  | SFAGMKKPQER  |
| 387 | P00077 | 33  | CHTGAKGGANG  |
| 388 | P00077 | 97  | SFAGIKKPQER  |
| 389 | P00043 | 7   | PAPYEKKGSEKK |
| 390 | P00076 | 8   | AERGGKLFESR  |
| 391 | P00076 | 72  | LENPKKYVPGT  |
| 392 | P00076 | 88  | GIKAKKDRQDI  |
| 393 | P00047 | 87  | FIPGTMMAFGG  |
| 394 | P02993 | 244 | SRPTEKPLRLP  |
| 395 | P02994 | 129 | EAGISKDGQTR  |
| 396 | P02994 | 154 | IVAVNKMDSVK  |
| 397 | P02994 | 170 | FQEIVKETSNF  |
| 398 | P02994 | 184 | VGYNPKTVPFV  |
| 399 | Q96KQ7 | 179 | PEGQPKVHRAR  |
| 400 | Q96KQ7 | 253 | EVTLTKGDPGS  |
| 401 | Q96KQ7 | 288 | VSDSKSEVEA   |
| 402 | Q96KQ7 | 344 | RRKAKKKWRKD  |
| 403 | P53991 | 101 | IETEGKIPFWE  |
| 404 | P53991 | 282 | EQNNRKGKMY   |
| 405 | P10587 | 33  | DWSAKKLVWVP  |
| 406 | P10587 | 67  | QENGGKVTLSK  |
| 407 | P10587 | 82  | KMNPPKFSKVE  |
| 408 | P10587 | 183 | ESGAGKTENTK  |
| 409 | P10587 | 189 | TENTKKVIQYL  |
| 410 | P11416 | 109 | ACEGCKGFFRR  |
| 411 | P11416 | 128 | TCHRDKNCIIN  |
| 412 | P11416 | 134 | NCIINKVTRNR  |
| 413 | P11416 | 171 | KKEAPKPECSE  |
| 414 | P11416 | 227 | IDLWDKFSELS  |
| 415 | P11416 | 234 | SELSTKCI IKT |
| 416 | P27064 | 164 | RDKLNKYGRPL  |
| 417 | P27064 | 316 | FRVLAKALRMS  |
| 418 | P27064 | 466 | VWKEIKFEFEA  |
| 419 | P04717 | 252 | CEEMLKRAVFA  |
| 420 | P04717 | 356 | DDYIKKDRSRG  |
| 421 | P04992 | 21  | GVKEYKLTYYT  |
| 422 | P04992 | 252 | CEEMMKRAVFA  |
| 423 | P04992 | 463 | ACEVWKEIRFN  |
| 424 | Q5SLP6 | 39  | IMEFVKAFNAA  |
| 425 | Q5SLP6 | 109 | VLEIAKQKMPD  |
| 426 | P0CX53 | 96  | DRKKDKNVKHS  |
| 427 | P0CX53 | 99  | KDKNVKHSGNI  |
| 428 | P62986 | 27  | TIENVKAKIQD  |
| 429 | P62986 | 29  | ENVKAKIQDKE  |
| 430 | P62986 | 112 | AVNCRKKKCGH  |
| 431 | P55072 | 136 | FEVYLPYPFLE  |
| 432 | O95785 | 105 | IVRTMKPHAEL  |
| 433 | O95785 | 373 | YVQHAKLHMRE  |
| 434 | O95785 | 479 | VDYFGKAEPSL  |

|     |        |     |             |
|-----|--------|-----|-------------|
| 435 | P05141 | 33  | PIERVKLLLQV |
| 436 | P05141 | 92  | LNFAFKDKYKQ |
| 437 | P05141 | 166 | LVKIYKSDGIK |
| 438 | Q9Y232 | 17  | GKSRKKNWQYE |
| 439 | P00042 | 6   | PAPFKKGSEKK |
| 440 | P00042 | 28  | CHTVEKGGPHK |
| 441 | P00042 | 95  | GLKKEKDRNDL |
| 442 | P26358 | 29  | VRRRLKDLERD |
| 443 | P26358 | 45  | ECVKEKLNLLH |
| 444 | P26358 | 67  | CDLETKLRKEE |
| 445 | P26358 | 81  | EGYLAKVKSLL |
| 446 | P26358 | 130 | ANSPPKPLSKP |
| 447 | P26358 | 148 | SDGEAKPEPSP |
| 448 | O75530 | 70  | RKSWGKWKWS  |
| 449 | O75530 | 72  | SWGKWKWSKK  |
| 450 | O75530 | 77  | KWKSCKCKYSF |
| 451 | O75530 | 250 | DLLGEKIMSCG |
| 452 | Q5VTE0 | 20  | HVDSGKSTTTG |
| 453 | Q5VTE0 | 51  | AAEMKGSFKY  |
| 454 | Q5VTE0 | 84  | KFETSKYYVTI |
| 455 | Q5VTE0 | 154 | IVGVNKMDSTE |
| 456 | Q5VTE0 | 172 | YEEIVKEVSTY |
| 457 | P0CE47 | 137 | IVFLNKCDMVD |
| 458 | P0CE47 | 283 | LLRGIKREEIE |
| 459 | P0CE47 | 325 | HTPFFKGYRPQ |
| 460 | O75367 | 96  | LNQLLKGVTIA |
| 461 | O75367 | 142 | KSPSQKKPVSK |
| 462 | O75367 | 143 | SPSQKKPVSKK |
| 463 | O75367 | 147 | KKPVSKKAGGK |
| 464 | O75367 | 152 | KKAGGKKGARK |
| 465 | O75367 | 153 | KAGGKKGARKS |
| 466 | P62807 | 16  | PKKGSKKAATK |
| 467 | P62807 | 17  | KKGSKKAATKA |
| 468 | O15819 | 126 | VTIMPKDIHLA |
| 469 | Q55BN9 | 123 | VTIMVKDIQLA |
| 470 | P61830 | 38  | TGGVKKPHRYK |
| 471 | P04637 | 24  | FSDLWKLLPEN |
| 472 | P04637 | 139 | FCQLAKTCPVQ |
| 473 | Q86L05 | 46  | DTKKDKRFSGQ |
| 474 | Q86L05 | 78  | CDEATKIGAEF |
| 475 | P80322 | 37  | GDISTKELGTI |
| 476 | P14909 | 31  | ARNVEKTKKIK |
| 477 | P14909 | 137 | YAEVVKLLGGK |
| 478 | P39462 | 313 | LAEAGKVKPMI |
| 479 | Q9Y232 | 312 | GVTASKRKFID |
| 480 | Q9Y232 | 314 | TASKRKFIDDR |
| 481 | P0C835 | 6   | MSSGKKAATK  |
| 482 | P0C835 | 48  | DPETGKYFRHK |
| 483 | P80053 | 45  | RIIQVKIQIRG |
| 484 | P80053 | 231 | GYIAGKFLSEM |
| 485 | P80053 | 265 | KAIEIKEKTGS |
| 486 | P13123 | 22  | TSKIKKVWRVG |

|     |        |     |              |
|-----|--------|-----|--------------|
| 487 | P61991 | 13  | YKGEEKQVDIS  |
| 488 | P61991 | 53  | EKDAPKELLQM  |
| 489 | P39476 | 13  | YKGEEKEVDIS  |
| 490 | P26358 | 240 | EERDEKEEKRL  |
| 491 | P26358 | 243 | DEKEEKRLRSQ  |
| 492 | P26358 | 255 | KEPTPKQKLKE  |
| 493 | P26358 | 259 | PKQKLKEEPDR  |
| 494 | P26358 | 281 | EDGDEKDEKKH  |
| 495 | P26358 | 285 | EKDEKKhRSQP  |
| 496 | P26358 | 296 | KDLAAKRRPEE  |
| 497 | Q5VTE0 | 273 | ETGVLPKGMVV  |
| 498 | P81539 | 13  | SLPVVKEEQGV  |
| 499 | P81539 | 19  | EEQGVKIYGTY  |
| 500 | P49949 | 73  | HPASEKKADPI  |
| 501 | O43524 | 270 | GRAAKKKAALQ  |
| 502 | O43524 | 455 | TIQENKPATFS  |
| 503 | O43524 | 569 | SLGSAKHQQQS  |
| 504 | Q08369 | 320 | QTRKRKPKNLN  |
| 505 | Q08369 | 326 | PKNLNKSKTPA  |
| 506 | P16403 | 26  | KKKAAKKAGGT  |
| 507 | P16403 | 136 | PVGAAKKPKKA  |
| 508 | P16403 | 152 | PKKSAKKTTPK  |
| 509 | P16403 | 156 | AKKTPKKAKKP  |
| 510 | P10412 | 32  | SAGAAKrkASG  |
| 511 | P10412 | 139 | AAKKPKKATGA  |
| 512 | P16401 | 67  | LAALKKALAAG  |
| 513 | P16401 | 141 | GATPKKAKKAA  |
| 514 | O75367 | 160 | ARKSKKKQGEV  |
| 515 | O75367 | 196 | LFLGQKLNLIH  |
| 516 | O75367 | 250 | VLELRKKNGPL  |
| 517 | P40283 | 40  | PKAGKLPKEA   |
| 518 | P40283 | 58  | KKMKKKSVEY   |
| 519 | P40283 | 98  | NDIFEKLAQEA  |
| 520 | O14979 | 137 | FAEGSKINASK  |
| 521 | O14979 | 212 | ELKEHKLDGKL  |
| 522 | O14979 | 224 | DPKRAKALKGK  |
| 523 | Q14103 | 242 | KKIMEKKYHNV  |
| 524 | P16862 | 33  | IDFYTKFLSLE  |
| 525 | P16862 | 106 | DILAVKDTLNA  |
| 526 | P16862 | 144 | GVTSTKNAVST  |
| 527 | P16862 | 276 | CMEFKKREGRL  |
| 528 | P16862 | 551 | QAKDFKRAMSL  |
| 529 | O00159 | 289 | WKVVVRKALTVI |
| 530 | O00159 | 444 | NYCNEKLOQLF  |
| 531 | O00159 | 627 | YVRCIKPNDAK  |
| 532 | P13538 | 50  | KESFVKGTIQS  |
| 533 | P13538 | 56  | GTIQSKEGGKV  |
| 534 | P13538 | 206 | AASGEKKKEEQ  |
| 535 | P13538 | 273 | TYLLEKSRVTF  |
| 536 | P13538 | 366 | HYGNLKFQKQ   |
| 537 | Q96RI1 | 158 | TCEGCKGFFRR  |
| 538 | Q96RI1 | 174 | AVYKCKNGGNC  |

|     |        |     |              |
|-----|--------|-----|--------------|
| 539 | Q96RI1 | 224 | SKRLRKNVKQH  |
| 540 | Q96RI1 | 384 | MFSFYKSIGEL  |
| 541 | Q96RI1 | 390 | SIGELKMTQEE  |
| 542 | P11940 | 80  | DVIKGPVVRIM  |
| 543 | P11940 | 129 | NILSCKVVCDE  |
| 544 | P11940 | 229 | TDESGKSKGFG  |
| 545 | P11940 | 231 | ESGKSKGFGFV  |
| 546 | P11940 | 333 | EGGRSKGFGFV  |
| 547 | P11940 | 348 | PEEATKAVTEM  |
| 548 | P06400 | 154 | SRLKKYDVLV   |
| 549 | P06400 | 447 | GSQRYKLGVRL  |
| 550 | P0CX43 | 18  | VKELLKYSNET  |
| 551 | P0CX43 | 105 | IKKLSKKYNAF  |
| 552 | P47914 | 15  | HNQSRKWHRNG  |
| 553 | P47914 | 63  | QANNAKAMSAR  |
| 554 | P47914 | 73  | RAEAIKALVKP  |
| 555 | P47914 | 126 | PKAKAKAKAKD  |
| 556 | P47914 | 130 | AKAKAKDQTKA  |
| 557 | Q969Q0 | 13  | RRTFCCKCGKH  |
| 558 | Q969Q0 | 14  | RTFCKKCGKHQ  |
| 559 | Q969Q0 | 22  | KHOPHKVTQYK  |
| 560 | Q969Q0 | 27  | KVTQYKKGKDS  |
| 561 | Q969Q0 | 97  | ELGGDKKRKGQ  |
| 562 | P0CX27 | 6   | MVNVPKTRKTY  |
| 563 | P0CX27 | 9   | VPKTRKTYCKG  |
| 564 | P0CX27 | 13  | RKTYCKGKTCR  |
| 565 | P0CX27 | 29  | KVTQYKAGKAS  |
| 566 | P02393 | 31  | KELEEKFGVSA  |
| 567 | P02393 | 102 | APSTLKEAVSK  |
| 568 | P0A7K2 | 66  | AAGANKVAVIK  |
| 569 | P0A7K2 | 96  | APAALKEGVSK  |
| 570 | Q04207 | 62  | THPTIKINGYT  |
| 571 | Q53688 | 216 | QESHSKILDLD  |
| 572 | Q53688 | 250 | SIIKNKIIIVE  |
| 573 | Q53688 | 302 | NFTAEEKISISE |
| 574 | Q53688 | 429 | HVFNQKRRGKI  |
| 575 | E5KWG9 | 16  | YSIIEKTAQVV  |
| 576 | E5KWG9 | 84  | HGLTPKTDHPV  |
| 577 | E5KWG9 | 258 | FERLIKSAFYD  |
| 578 | B6A879 | 148 | HYVGDKTKPKL  |
| 579 | B6A879 | 152 | DKTKPKLSAYI  |
| 580 | Q9L5X8 | 54  | SNDIEKERGIT  |
| 581 | Q9L5X8 | 63  | ITILAKNTAIN  |
| 582 | Q9L5X8 | 133 | IVVINKIDRPG  |
| 583 | Q9L5X8 | 254 | KTRNGKVGTVM  |
| 584 | Q9L5X8 | 427 | NIGLRKGELKD  |
| 585 | Q9L5X8 | 545 | NALKGKQLTNV  |
| 586 | D0ZRV8 | 14  | IELVKVNRNK   |
| 587 | Q6NEZ3 | 92  | ALIKIKDISVS  |
| 588 | Q6NEZ3 | 208 | PFATVKVDPAD  |
| 589 | Q6NEZ3 | 238 | ATVPEKLNEM   |
| 590 | Q6NEZ3 | 242 | EKLNEKMDGKV  |



|     |        |     |             |
|-----|--------|-----|-------------|
| 591 | Q6NEZ3 | 311 | TELDTKKPEDT |
| 592 | Q6NEZ3 | 403 | YDPEWKNESKK |
| 593 | Q9UKV3 | 58  | PSTSRKMAELE |
| 594 | Q9UKV3 | 70  | VTLDGKPLQAL |
| 595 | Q9UKV3 | 91  | QRGLAKSGQKS |
| 596 | P18281 | 71  | EDVHVKKVDRG |
| 597 | Q9SJU4 | 10  | TATMLKASPVK |
| 598 | Q9SJU4 | 58  | ADELVKTAKTI |
| 599 | Q9SJU4 | 150 | GIKVDKGLVPL |
| 600 | Q9SJU4 | 378 | LAQLGKYTGEG |
| 601 | Q9ZU52 | 238 | LEVAEKVWSEV |
| 602 | P11118 | 144 | YEEFVKMMMSK |
| 603 | P04573 | 81  | LTLCSKWVRQD |
| 604 | P04573 | 153 | FMDLIKKSNA  |
| 605 | P00044 | 11  | AGSAKKGATLF |
| 606 | P00063 | 35  | KGAGHKQGNL  |
| 607 | P00043 | 11  | EKGSEKKGANL |
| 608 | P00070 | 17  | PTTGEKIFKTK |
| 609 | P02993 | 84  | KFETAKYYVTI |
| 610 | P02993 | 171 | RFEEIKKEVSA |
| 611 | P02994 | 44  | IEKFEKEAAEL |
| 612 | P02994 | 178 | SNFIKKGYNP  |
| 613 | Q96KQ7 | 53  | EETLPKATPDS |
| 614 | Q96KQ7 | 122 | PSSPSKGGSCP |
| 615 | Q96KQ7 | 229 | LAKRRKLNSSG |
| 616 | Q96KQ7 | 348 | KKKWRKDSPPW |
| 617 | Q96KQ7 | 354 | DSPWVKPSRKR |
| 618 | Q96KQ7 | 361 | SRKRRKREPPR |
| 619 | P53991 | 73  | NKAPFKAKVRS |
| 620 | P53991 | 251 | GNSDAKLYDEE |
| 621 | P53991 | 262 | LQAIKAYPGQ  |
| 622 | P10587 | 85  | PPKFSKVEDMA |
| 623 | P10587 | 142 | IIDMYKGKKRH |
| 624 | P68696 | 81  | RSIYGKKSAG  |
| 625 | P68696 | 82  | SIYGKKSAGV  |
| 626 | P68696 | 94  | TVKTSKSILVG |
| 627 | P68696 | 116 | ANVVEKLADYL |
| 628 | P11416 | 155 | DVGMSKESVRN |
| 629 | P11416 | 207 | LCQLGKYTTNN |
| 630 | P27064 | 146 | PTAYIKTFQGP |
| 631 | P27064 | 463 | ACEVWKEIKFE |
| 632 | P04717 | 146 | PYAYVKTFQGP |
| 633 | P0A7J7 | 81  | AAVLLKKAAGI |
| 634 | P0A7J7 | 97  | KPNKDKVGKIS |
| 635 | P0A7J7 | 113 | EIAQTKAADMT |
| 636 | Q5SLP6 | 86  | AAGLEKGAHKP |
| 637 | P0CX53 | 48  | GEDIAKATKEF |
| 638 | P0CX53 | 57  | EFKGIKVTVQL |
| 639 | P62986 | 11  | KTLTGKTITLE |
| 640 | P62986 | 48  | LIFAGKQLEDG |
| 641 | P62986 | 93  | KYNCDKMICRK |
| 642 | P55072 | 8   | SGADSKGDDLS |

|     |        |     |              |
|-----|--------|-----|--------------|
| 643 | P55072 | 18  | STAILKQKNRP  |
| 644 | P55072 | 45  | SLSQPKMDELQ  |
| 645 | P55072 | 60  | DTVLLKGKKRR  |
| 646 | P55072 | 62  | VLLKGKKRREA  |
| 647 | P55072 | 312 | DAIAPKREKTH  |
| 648 | P05547 | 11  | AAEEAKKKQDD  |
| 649 | P05547 | 34  | EEQSLKKQKKG  |
| 650 | P05547 | 63  | AEELKKEQERK  |
| 651 | O95785 | 339 | IEEIQKLKQVP  |
| 652 | P05141 | 43  | VQHASKQITAD  |
| 653 | P05141 | 163 | GDCLVKIYKSD  |
| 654 | P05141 | 171 | KSDGIKGLYQG  |
| 655 | P05141 | 206 | MLPDPKNTHIV  |
| 656 | Q9Y232 | 116 | RRHTEKQKEST  |
| 657 | P00042 | 33  | KGGPHKVGPNL  |
| 658 | P26358 | 188 | ESERAKSDESI  |
| 659 | P26358 | 233 | GTRTEKKEEERD |
| 660 | Q5VTE0 | 100 | HRDFIKNMITG  |
| 661 | P0CE47 | 38  | TTVLAKEYGGA  |
| 662 | P0CE47 | 253 | IKETQKSTCTG  |
| 663 | O75367 | 7   | SSRGGKKKSTK  |
| 664 | O75367 | 121 | KKRGSKGKLEA  |
| 665 | O75367 | 137 | PAKKAKSPSQK  |
| 666 | P69150 | 54  | LREIRKYQKST  |
| 667 | P69150 | 123 | VTIMTKDMQLA  |
| 668 | P59226 | 57  | IRKYQKSTELL  |
| 669 | P62803 | 60  | TRGVLKVFLFN  |
| 670 | P62803 | 78  | YTEHAKRKTVT  |
| 671 | P62803 | 92  | VVYALKRQGR   |
| 672 | P04637 | 319 | SSPQPKKKPLD  |
| 673 | P04637 | 320 | SPQPKKKPLDG  |
| 674 | P04637 | 357 | DAQAGKEPGGS  |
| 675 | Q86L05 | 61  | TVTTPKLSVVCV |
| 676 | Q86L05 | 133 | LNKVGKFPDLL  |
| 677 | Q7M1B9 | 57  | RLTIAKVNTDD  |
| 678 | P80322 | 6   | SDDYVKARVMF  |
| 679 | P80322 | 12  | ARVMFKEEQIS  |
| 680 | P14909 | 51  | DLPTFKRIRDA  |
| 681 | P14909 | 58  | IRDAAKEALDQ  |
| 682 | P14909 | 169 | QSKISKRTKMI  |
| 683 | P14909 | 242 | VNGFSKTFST   |
| 684 | P14909 | 354 | KLIEEKGVVTI  |
| 685 | P39462 | 22  | EIGVPKPKGPQ  |
| 686 | P39462 | 73  | HEIAGKIEEVG  |
| 687 | P39462 | 239 | RITESKGVDAV  |
| 688 | P39462 | 259 | LSVYPKALAKQ  |
| 689 | P39462 | 315 | EAGKVKPMITK  |
| 690 | P39462 | 338 | NLENFKAIGRQ  |
| 691 | P22498 | 35  | NTDWYKVVHDP  |
| 692 | P22498 | 251 | AYDGIKSVSKK  |
| 693 | P0C835 | 9   | GKKAVKVKTPA  |
| 694 | P80053 | 17  | TQQVKKLYKVG  |

|     |        |     |              |
|-----|--------|-----|--------------|
| 695 | P80053 | 207 | KEAANKFIGGV  |
| 696 | P80053 | 304 | ENVINKFNAPK  |
| 697 | P80053 | 415 | VVRAMKARGIL  |
| 698 | P13123 | 13  | YKGEEKEVDTS  |
| 699 | P13123 | 21  | DTSKIKKVWRV  |
| 700 | P13123 | 39  | YDDNGKTGRGA  |
| 701 | P13123 | 48  | GAVSEKDAPKE  |
| 702 | P26358 | 250 | LRSQTKKEPTPK |
| 703 | O75530 | 375 | MDFWQKMLALG  |
| 704 | Q5VTE0 | 392 | LEDGPKFLKSG  |
| 705 | P55907 | 75  | PASEKKADPVN  |
| 706 | O43524 | 259 | MDNSNKYTKSR  |
| 707 | Q08369 | 318 | GIQTRKRKPKN  |
| 708 | P16403 | 21  | EKAPVKKKAAK  |
| 709 | P16403 | 63  | SLAALKKALAA  |
| 710 | P16403 | 97  | TLVQTKGTGAS  |
| 711 | P16403 | 122 | KPKVKKAGGTK  |
| 712 | P16403 | 127 | KAGGTPKPKPV  |
| 713 | P16403 | 129 | GGTKPKKPVGA  |
| 714 | P10412 | 23  | TPVKKKARKSA  |
| 715 | P10412 | 129 | GAAKAKKPAGA  |
| 716 | P16401 | 133 | AAKAKKPAGAT  |
| 717 | O75367 | 226 | ADIDLKDDLGN  |
| 718 | O75367 | 239 | EKKGGKEFVEA  |
| 719 | P40283 | 36  | AEKKPKAGKKL  |
| 720 | P40283 | 57  | KKMKKKSJET   |
| 721 | P40283 | 69  | KIYIFKVLKQV  |
| 722 | P40283 | 142 | VSEGTKAVTKF  |
| 723 | Q41811 | 80  | EHARRKTVTAM  |
| 724 | O14979 | 209 | KVLELKEHKLD  |
| 725 | O14979 | 250 | SEEQIKEYFGA  |
| 726 | O14979 | 269 | LPMDTKTNERR  |
| 727 | O14979 | 288 | DEEVPKLLLES  |
| 728 | O14979 | 302 | QIGSGKCEIKV  |
| 729 | Q14103 | 98  | QREEWKMFIGG  |
| 730 | Q14103 | 153 | SESVDKVMQK   |
| 731 | Q14103 | 158 | KVMDQKEHKLN  |
| 732 | Q14103 | 218 | LPMDNKTNKRR  |
| 733 | Q14103 | 341 | QSGYGKVSRRG  |
| 734 | P16862 | 58  | DSISLKILLRP  |
| 735 | P16862 | 225 | RSALFKGCRAF  |
| 736 | P16862 | 248 | GPEYIKEFHWE  |
| 737 | P16862 | 432 | CDIVSKHRSRG  |
| 738 | P16862 | 585 | KLPKDKRLKIA  |
| 739 | O00159 | 281 | SSINDKSDWKV  |
| 740 | O00159 | 361 | RKIIAKGEELL  |
| 741 | O00159 | 455 | IELTLKSEQEE  |
| 742 | O00159 | 561 | TGFLDKNNDLL  |
| 743 | O00159 | 578 | TMCSSKNPIMS  |
| 744 | P13538 | 31  | IEAQNKPFDAK  |
| 745 | P13538 | 88  | PPKYDKIEDMA  |
| 746 | P13538 | 208 | SGEKKKEEQSG  |

|     |        |     |                                                |
|-----|--------|-----|------------------------------------------------|
| 747 | P13538 | 297 | IMSNK <b>K</b> PELID                           |
| 748 | P13538 | 386 | TEVAD <b>K</b> AAYLM                           |
| 749 | P13538 | 400 | SAELL <b>K</b> ALCYP                           |
| 750 | P11940 | 108 | IKNLD <b>K</b> SIDNK                           |
| 751 | P11940 | 167 | LLNDR <b>K</b> VFVGR                           |
| 752 | P11940 | 221 | PALSV <b>K</b> VMTDE                           |
| 753 | P11940 | 246 | HEDA <b>Q</b> KAVDEM                           |
| 754 | P11940 | 312 | DERLR <b>K</b> EFSPF                           |
| 755 | P11940 | 371 | ALA <b>Q</b> R <b>K</b> EERQA                  |
| 756 | P11940 | 512 | TVP <b>Q</b> Y <b>K</b> YAAGV                  |
| 757 | P06400 | 94  | GGY <b>I</b> <b>Q</b> <b>K</b> KKELW           |
| 758 | P06400 | 236 | PPML <b>L</b> <b>K</b> EPYKT                   |
| 759 | P06400 | 417 | KES <b>I</b> L <b>K</b> RVKDI                  |
| 760 | Q86L05 | 195 | LVSL <b>L</b> <b>K</b> KGWQN                   |
| 761 | P0CX43 | 54  | FSG <b>S</b> L <b>K</b> LPNCP                  |
| 762 | P0CX43 | 92  | VDDL <b>K</b> LNKNK                            |
| 763 | P0CX43 | 133 | LSK <b>A</b> G <b>K</b> FPTPV                  |
| 764 | P0CX43 | 160 | IKF <b>Q</b> L <b>K</b> KVLCL                  |
| 765 | P0CX43 | 196 | VSL <b>L</b> <b>K</b> KNWQNV                   |
| 766 | P47914 | 87  | KPK <b>I</b> P <b>K</b> GVSrk                  |
| 767 | P47914 | 106 | HPK <b>L</b> G <b>K</b> RARAR                  |
| 768 | P47914 | 114 | RARIA <b>K</b> GLRLC                           |
| 769 | Q969Q0 | 30  | QY <b>K</b> K <b>G</b> KDSLya                  |
| 770 | Q969Q0 | 64  | KAK <b>T</b> <b>K</b> KIVLR                    |
| 771 | Q969Q0 | 65  | AK <b>T</b> <b>K</b> KIVLRL                    |
| 772 | Q969Q0 | 80  | PNC <b>R</b> S <b>K</b> RMLAI                  |
| 773 | P0CX27 | 32  | QY <b>K</b> A <b>G</b> KASLFA                  |
| 774 | P0CX27 | 63  | FHK <b>K</b> A <b>K</b> TTKKV                  |
| 775 | P0CX27 | 66  | KAK <b>T</b> <b>K</b> KVVLR                    |
| 776 | P0CX27 | 98  | LG <b>G</b> E <b>K</b> <b>Q</b> KGQA           |
| 777 | P02393 | 26  | LSE <b>F</b> <b>I</b> <b>K</b> ELEEK           |
| 778 | P07472 | 103 | KE <b>G</b> M <b>S</b> KEDGDE                  |
| 779 | Q12962 | 175 | AL <b>Q</b> H <b>C</b> KMKGTA                  |
| 780 | Q04207 | 37  | MR <b>F</b> RY <b>K</b> CEGRS                  |
| 781 | Q04207 | 123 | I <b>Q</b> C <b>V</b> <b>K</b> KRDLEQ          |
| 782 | Q04207 | 315 | KS <b>I</b> M <b>K</b> KSPFNG                  |
| 783 | Q53688 | 140 | DT <b>V</b> I <b>S</b> KGLLKI                  |
| 784 | Q53688 | 144 | SK <b>G</b> L <b>L</b> KIVKDG                  |
| 785 | Q53688 | 265 | F <b>Q</b> E <b>E</b> L <b>K</b> LNSDG         |
| 786 | Q53688 | 379 | PE <b>A</b> Y <b>T</b> <b>K</b> LQQYM          |
| 787 | E5KWG9 | 68  | F <b>T</b> M <b>L</b> P <b>K</b> GLDPY         |
| 788 | E5KWG9 | 94  | V <b>G</b> S <b>L</b> L <b>K</b> EVHEN         |
| 789 | E5KWG9 | 126 | F <b>P</b> S <b>A</b> E <b>K</b> LKGVS         |
| 790 | E5KWG9 | 168 | G <b>I</b> D <b>Y</b> S <b>K</b> RTMNL         |
| 791 | B6A879 | 210 | G <b>D</b> I <b>G</b> N <b>K</b> SKKVQ         |
| 792 | B6A879 | 298 | H <b>A</b> M <b>G</b> H <b>K</b> LDLAF         |
| 793 | B6A879 | 402 | S <b>G</b> V <b>K</b> A <b>K</b> LKKS <b>N</b> |
| 794 | B6A879 | 565 | T <b>P</b> R <b>T</b> V <b>K</b> QKGEY         |
| 795 | Q9L5X8 | 22  | H <b>V</b> D <b>H</b> G <b>K</b> TTLVD         |
| 796 | Q9L5X8 | 165 | D <b>Q</b> L <b>D</b> F <b>K</b> VVYAS         |
| 797 | Q9L5X8 | 236 | T <b>R</b> G <b>S</b> V <b>K</b> ANQOV         |
| 798 | Q9L5X8 | 359 | T <b>D</b> D <b>P</b> D <b>K</b> FRVSG         |

|     |        |     |             |
|-----|--------|-----|-------------|
| 799 | D0ZRV8 | 76  | IETLQKSIDNE |
| 800 | Q6NEZ3 | 90  | FDALIKIKDIS |
| 801 | Q6NEZ3 | 280 | DTSGSKTITAR |
| 802 | Q6NEZ3 | 312 | ELDTKKPEDTD |
| 803 | Q6NEZ3 | 408 | KNESKKNESY  |
| 804 | Q9UKV3 | 41  | EGRWRKLPKMP |
| 805 | Q9UKV3 | 81  | RVTDLKAALEQ |
| 806 | Q9UKV3 | 113 | LENLQKHSTPH |
| 807 | Q9UKV3 | 138 | QNSFIKQYLEK |
| 808 | Q9UKV3 | 220 | DSDDEKPRKGE |
| 809 | Q9UKV3 | 349 | QEEARKSHLAR |
| 810 | P18281 | 23  | AETVDKSAPQI |
| 811 | Q9SJU4 | 358 | KEENVKAAQDI |
| 812 | Q9SJU4 | 369 | LLARAKANSLA |
| 813 | Q9SJU4 | 389 | ESEEAKEGMFV |
| 814 | Q9ZU52 | 53  | LVKTAKSIASP |
| 815 | Q9ZU52 | 273 | AEHKNKASPET |
| 816 | Q9ZU52 | 345 | RTWQKPEKIE  |
| 817 | Q9ZU52 | 354 | IEASQKALLVR |
| 818 | Q9ZU52 | 361 | LLVRAKANSLA |
| 819 | P62157 | 78  | MARKMKDTDSE |
| 820 | P04573 | 50  | GQTYTKRETEA |
| 821 | P04573 | 156 | LIKKSKNALKE |
| 822 | P00889 | 107 | QKMLPKAKGGE |
| 823 | P00889 | 321 | QKEVKGKDVSD |
| 824 | P00044 | 60  | TDANIKKNVLW |
| 825 | P00044 | 61  | DANIKKNVLWD |
| 826 | P00078 | 22  | GEKLFKGRAAQ |
| 827 | P00077 | 61  | GFAYSKANADS |
| 828 | P00043 | 96  | GLKKAADRNDL |
| 829 | P00070 | 64  | AGNKNKAVIWE |
| 830 | P00047 | 61  | YTDANKQAGIT |
| 831 | Q71V39 | 215 | WFKGWKVERKE |
| 832 | P02993 | 222 | ERKEGKADGKT |
| 833 | P02994 | 84  | KFETPKYQVTV |
| 834 | Q96KQ7 | 28  | ALLEKETRGA  |
| 835 | Q96KQ7 | 200 | PPVPEKRPPEI |
| 836 | Q96KQ7 | 219 | VHSLGKVTSDL |
| 837 | Q96KQ7 | 226 | TSDLAKRRKLN |
| 838 | P53991 | 169 | KEDPAKKGLCS |
| 839 | P53991 | 194 | TGPTGKVLLLP |
| 840 | P10587 | 50  | EAASIKEEKGD |
| 841 | P10587 | 66  | LQENGGKVTLS |
| 842 | P10587 | 77  | KDDIQKMNPPK |
| 843 | P10587 | 136 | PIYSEKIIDMY |
| 844 | P11416 | 193 | IEKVRKAHQET |
| 845 | P11416 | 238 | TKCIIKTVEFA |
| 846 | P27064 | 21  | GVKDYKLTYYT |
| 847 | P27064 | 128 | NVFGFKALRAL |
| 848 | P04717 | 81  | SLDRYKGRCYE |
| 849 | P04717 | 316 | FRVLAALRLS  |
| 850 | P04992 | 305 | VIDRQKNHGIH |

|     |        |     |             |
|-----|--------|-----|-------------|
| 851 | P0A7J7 | 45  | KAFNAKTDSIE |
| 852 | P0A7J7 | 82  | AVLLKKAAGIK |
| 853 | Q5SLP6 | 80  | SYLIRKAAGLE |
| 854 | Q5SLP6 | 111 | EIAKQKMPDLN |
| 855 | P0CX53 | 54  | ATKEFKGIKVT |
| 856 | P0CX53 | 63  | VTVQLKIQNRQ |
| 857 | P62986 | 63  | DYNIQKESTLH |
| 858 | P62986 | 113 | VNCRKKKCGHT |
| 859 | P55072 | 63  | LLKGGKRREAV |
| 860 | P55072 | 81  | TCSDEKIRMNR |
| 861 | P55072 | 164 | RAVEFKVVETD |
| 862 | P55072 | 277 | PEIMSKLAGES |
| 863 | P55072 | 288 | ESNLRKAFEEA |
| 864 | P05547 | 20  | DDIDRKKAEVR |
| 865 | P05547 | 55  | RLLLRKKAAEE |
| 866 | P05547 | 99  | LRAIIKEYFDH |
| 867 | O95785 | 341 | EIQKLKQVPGD |
| 868 | O95785 | 743 | SAEEVKAIERR |
| 869 | Q9Y232 | 27  | EGPTQKLFLKR |
| 870 | Q9Y232 | 84  | YLVRWKGVDSE |
| 871 | Q9Y232 | 118 | HTEKQKESTLT |
| 872 | Q9Y232 | 185 | SLSSRKNMDLA |
| 873 | P00042 | 10  | KKGSEKKGATL |
| 874 | P26358 | 88  | KSLLNKDLSLE |
| 875 | P26358 | 194 | SDESIKEEDKD |
| 876 | O75530 | 20  | MPAAKQKLSS  |
| 877 | O75530 | 79  | KSKKCKYSFKC |
| 878 | O75530 | 83  | CKYSFKCVNSL |
| 879 | O75530 | 275 | MMNAIKESYDY |
| 880 | Q5VTE0 | 30  | GHLIYKCGGID |
| 881 | Q5VTE0 | 62  | AWVLDKLKAER |
| 882 | P0CE47 | 188 | AEWEAKILELA |
| 883 | P0CE47 | 264 | VEMFRKLLDEG |
| 884 | O75367 | 73  | ARDNKKGRVTP |
| 885 | P62807 | 21  | KKAVTKAQKKD |
| 886 | P62807 | 28  | QKKDGKKRKRS |
| 887 | P61830 | 116 | AAIHAKRVTIQ |
| 888 | P61830 | 122 | RVTIQKKDIKL |
| 889 | P62803 | 9   | RGKGGKGLGKG |
| 890 | P62803 | 45  | RRGGVKRISGL |
| 891 | P04637 | 120 | HSGTAKSVTCT |
| 892 | P04637 | 351 | EALELKDAQAG |
| 893 | Q86L05 | 38  | LQINLKNYDTK |
| 894 | Q86L05 | 44  | NYDTKKDKRFS |
| 895 | Q86L05 | 59  | IGTVTKPKLSV |
| 896 | Q86L05 | 91  | IEALKKIGPKN |
| 897 | Q86L05 | 101 | NKKAIKKLSKK |
| 898 | Q86L05 | 106 | KKLSKKYDAFL |
| 899 | Q7M1B9 | 20  | KVLKSKTPVVV |
| 900 | Q7M1B9 | 44  | APILDKLAGGY |
| 901 | Q7M1B9 | 82  | TLVIFKDGREV |
| 902 | P80322 | 104 | FRVLDKNGDGF |

|     |        |     |              |
|-----|--------|-----|--------------|
| 903 | P80322 | 112 | DGFIDKDEFRA  |
| 904 | P14909 | 23  | TTLLEYKEIARN |
| 905 | P14909 | 172 | ISKRTKMIVFN  |
| 906 | P14909 | 302 | VSLFKKRRDVM  |
| 907 | P22498 | 124 | DEYANKDALNH  |
| 908 | P22498 | 328 | TRTVVKRTEKG  |
| 909 | P22498 | 451 | VDYNTKRLYWR  |
| 910 | P0C835 | 11  | KAVKVKTPAGK  |
| 911 | P0C835 | 24  | ELVPEKVWALA  |
| 912 | P80053 | 117 | VRVDPKCLTRE  |
| 913 | P80053 | 166 | LDEYIKITGKV  |
| 914 | P13123 | 19  | EVDTSKIKKVV  |
| 915 | P61991 | 9   | VKFKYKGEEKQ  |
| 916 | P61991 | 22  | ISKIKKVWRVG  |
| 917 | P13125 | 9   | VRFKYKGEEKE  |
| 918 | P13125 | 52  | EKDAPKELMDM  |
| 919 | P39476 | 19  | EVDISKIKKVV  |
| 920 | P26358 | 257 | PTPKQKLKEEP  |
| 921 | O75530 | 342 | EDDIDKIKPSE  |
| 922 | O75530 | 408 | TLTHHKCGAAI  |
| 923 | Q5VTE0 | 290 | VTTEVKSVEMH  |
| 924 | Q5VTE0 | 313 | VGFKVKNVSVK  |
| 925 | Q5VTE0 | 330 | VAGDSKNDPPM  |
| 926 | Q5VTE0 | 386 | RRSGKKLEDGP  |
| 927 | P49949 | 74  | PASEKKADPIN  |
| 928 | O43524 | 663 | NFTGAKQASSQ  |
| 929 | Q08369 | 245 | CGLYHKMNGIN  |
| 930 | Q08369 | 366 | EMRPIKTEPGL  |
| 931 | P16403 | 64  | LAALKKALAAA  |
| 932 | P16403 | 106 | ASGSFKLNKKA  |
| 933 | P16403 | 119 | GEAKPKVKKAG  |
| 934 | P16403 | 140 | AKKPKKAAGGA  |
| 935 | P10412 | 21  | EKTPVKKKARK  |
| 936 | P10412 | 119 | GEAKPKAKKAG  |
| 937 | P10412 | 122 | KPKAKKAGAAK  |
| 938 | P16401 | 17  | PAPVEKSPAKK  |
| 939 | P16401 | 149 | KAAGAKKAVKK  |
| 940 | P16401 | 153 | AKKAVKKTPEK  |
| 941 | O75367 | 161 | RKSKKKQGEVS  |
| 942 | O75367 | 167 | QGEVSKAASAD  |
| 943 | P40283 | 8   | PKAEKPAEKK   |
| 944 | P40283 | 18  | KPASEKPVEEK  |
| 945 | P40283 | 39  | KPKAGKKLPKE  |
| 946 | P40283 | 54  | GDKKKKMKKKS  |
| 947 | P40283 | 64  | SVETYKIYIFK  |
| 948 | P40283 | 72  | IFKVLKQVHPD  |
| 949 | P40283 | 105 | AQEASKLARYN  |
| 950 | O14979 | 221 | KLIDPKRAKAL  |
| 951 | O14979 | 234 | KEPPKVFVGG   |
| 952 | Q14103 | 72  | KIDASKNEEDE  |
| 953 | Q14103 | 110 | SWDTTKDLKD   |
| 954 | Q14103 | 170 | KVIDPKRAKAM  |

|      |        |     |              |
|------|--------|-----|--------------|
| 955  | Q14103 | 182 | TKEPVKKIFVG  |
| 956  | Q14103 | 197 | DTPEEKIREYF  |
| 957  | Q14103 | 221 | DNKTNKRRGFC  |
| 958  | Q14103 | 237 | EEEPVKKIMEK  |
| 959  | Q14103 | 243 | KIMEKKYHNVG  |
| 960  | Q14103 | 251 | NVGLSKCEIKV  |
| 961  | P16862 | 275 | RCMEFKKREGR  |
| 962  | P16862 | 369 | LDRICKAIDYV  |
| 963  | P16862 | 529 | NKIVRKPLMES  |
| 964  | P16862 | 583 | EPKLPKDKRLK  |
| 965  | O00159 | 151 | KTEATKRLLOF  |
| 966  | O00159 | 224 | SYLLEKSRVVH  |
| 967  | O00159 | 336 | TENQLKYLTRL  |
| 968  | O00159 | 404 | RSLASKDVESP  |
| 969  | O00159 | 477 | QYFNNKIICDL  |
| 970  | O00159 | 571 | LFRNLIKETMCS |
| 971  | P13538 | 23  | LRKSEKERIEA  |
| 972  | P13538 | 108 | VLYNLKERYAA  |
| 973  | P13538 | 214 | EEQSGKMOGTL  |
| 974  | Q96RI1 | 188 | MYMRRKQOECR  |
| 975  | Q96RI1 | 227 | LRKNVKQHADQ  |
| 976  | Q96RI1 | 317 | LVEFTKKLPGF  |
| 977  | Q96RI1 | 318 | VEFTKKLPGFQ  |
| 978  | P11940 | 196 | TNVYIKNFGED  |
| 979  | P11940 | 259 | KELNGKQIYVG  |
| 980  | P11940 | 324 | TITSAKVMMEG  |
| 981  | P11940 | 361 | RIVATKPLYVA  |
| 982  | P06400 | 63  | TALCQKLIKIPD |
| 983  | P06400 | 95  | GYIQKKKELWG  |
| 984  | P06400 | 153 | MSRLLKKYDVL  |
| 985  | P06400 | 265 | SARIAKQLEND  |
| 986  | P06400 | 329 | IYLNKNDLDAR  |
| 987  | P06400 | 412 | CTVNPKESILK  |
| 988  | P06400 | 462 | MESMLKSEEER  |
| 989  | P0CX43 | 78  | DVDRAKSCGVD  |
| 990  | P0CX43 | 95  | LKKLNKNKKLI  |
| 991  | P0CX43 | 118 | SEVLIKQVPRL  |
| 992  | P0CX43 | 156 | VRSTIKFQLKK  |
| 993  | P47914 | 52  | KKHNKGLKKM   |
| 994  | P47914 | 56  | KKGLKMQANN   |
| 995  | P47914 | 77  | IKALVKPKEVK  |
| 996  | P47914 | 134 | AKDQTKAQAAA  |
| 997  | Q969Q0 | 98  | LGGDKRKGQV   |
| 998  | P0CX27 | 24  | KHTQHKTQYK   |
| 999  | P0CX27 | 46  | RRYDRKQSGFG  |
| 1000 | P0CX27 | 60  | KPVFHKAKTT   |
| 1001 | P02393 | 66  | FDVILKAAGAN  |
| 1002 | P02393 | 115 | AEEAKQOLVEA  |
| 1003 | P0A7K2 | 108 | DAEALKKALEE  |
| 1004 | P07472 | 67  | TSAGEKKNVI   |
| 1005 | P07472 | 73  | KVNVIKVVREI  |
| 1006 | Q12962 | 108 | ANGDVKPVVSS  |



|      |        |     |             |
|------|--------|-----|-------------|
| 1007 | Q12962 | 177 | QHCKMKGTASG |
| 1008 | Q04207 | 79  | ISLVTKDPPHR |
| 1009 | Q53688 | 66  | ELGGEKEYRRL |
| 1010 | Q53688 | 176 | YDTLQKQNYTL |
| 1011 | Q53688 | 362 | VKECDKTNEIE |
| 1012 | Q53688 | 371 | IEEATKRNPEA |
| 1013 | Q53688 | 445 | STHDTKFSEDV |
| 1014 | E5KWG9 | 129 | AEKLGKVSELV |
| 1015 | B6A879 | 43  | VIFDGKVYTNT |
| 1016 | B6A879 | 531 | SLSMGKNGFVL |
| 1017 | Q9L5X8 | 431 | RKGELKDMAPD |
| 1018 | D0ZRV8 | 19  | KVNRNKVPTPM |
| 1019 | Q6NEZ3 | 123 | VGKNVKLDGNQ |
| 1020 | Q6NEZ3 | 352 | SLLPNKAPIRV |
| 1021 | Q6NEZ3 | 455 | QMGVYKYSNSL |
| 1022 | D1BQI7 | 90  | MASIVKALSrk |
| 1023 | Q9UKV3 | 95  | AKSGQKSALVK |
| 1024 | Q9UKV3 | 268 | ADRNLKTEEEE |
| 1025 | Q9UKV3 | 302 | EAPILKEFKEE |
| 1026 | Q9UKV3 | 325 | MDERPKTRSQE |
| 1027 | Q9SJU4 | 293 | ASYTLKLLRNR |
| 1028 | Q9ZU52 | 8   | SASFVKPNTLS |
| 1029 | Q9ZU52 | 370 | LAQLGKYSAEG |
| 1030 | Q9ZU52 | 382 | NEDAKKGMFVK |
| 1031 | P62157 | 76  | TMMARKMKDTD |
| 1032 | P04573 | 64  | EARGPKGDKKN |
| 1033 | P04573 | 154 | MDLIKKSKNAL |
| 1034 | P00889 | 43  | ADLIPKEQARI |
| 1035 | P00889 | 103 | IPECQKMLPKA |
| 1036 | P00889 | 352 | HAVLRKTDPRY |
| 1037 | P00889 | 450 | PLERPKSMSTD |
| 1038 | P00063 | 61  | YSAANKNMAVN |
| 1039 | P00078 | 84  | LENPKKFMPGT |
| 1040 | P00078 | 90  | FMPGTKMSFAG |
| 1041 | P00043 | 18  | GANLFKTRCLQ |
| 1042 | P00047 | 19  | GANLFKTRCAQ |
| 1043 | P00047 | 81  | LENPKKFIPGT |
| 1044 | Q71V39 | 84  | KFETTKYYITI |
| 1045 | Q71V39 | 172 | YDEIVKEVSAY |
| 1046 | P02994 | 51  | AAELGKGSFKY |
| 1047 | P02994 | 159 | KMDSVKWDESR |
| 1048 | Q96KQ7 | 131 | CPSRAKMSMTG |
| 1049 | P53991 | 122 | TKINSKGKEVP |
| 1050 | P53991 | 291 | MYIQDKVEEYA |
| 1051 | P53991 | 315 | YFCGLKGMPG  |
| 1052 | P07041 | 123 | VTIQSKDIQLA |
| 1053 | P10587 | 53  | SIKEEKGDEVT |
| 1054 | P10587 | 144 | DMYKGGKRHEM |
| 1055 | P10587 | 188 | KTENTKKVIQY |
| 1056 | P10587 | 204 | SSHKGKDTSI  |
| 1057 | P10587 | 205 | SHKGKDTSIT  |
| 1058 | P11416 | 262 | QITLLKAACLD |

|      |        |     |             |
|------|--------|-----|-------------|
| 1059 | P11416 | 365 | KVYVRKRRPSR |
| 1060 | P27064 | 32  | PEYETKDTDIL |
| 1061 | P27064 | 201 | GLDFTKDDENV |
| 1062 | P27064 | 252 | CEEMMKRAIFA |
| 1063 | P04717 | 32  | PDYQTKDTDIL |
| 1064 | P04717 | 450 | IREACKWSPEL |
| 1065 | P04992 | 81  | SLDRYKGHRYR |
| 1066 | P0A7J7 | 10  | VQAYVKLQVAA |
| 1067 | P0A7J7 | 51  | TDSIEKGLPIP |
| 1068 | P0A7J7 | 100 | KDKVGKISRAQ |
| 1069 | P0CX53 | 40  | LGLSPKKVGED |
| 1070 | P0CX53 | 86  | VITALKEPPRD |
| 1071 | P55072 | 217 | QLAQIKEMVEL |
| 1072 | P05547 | 35  | EQSLKKQKKGF |
| 1073 | P05547 | 37  | SLKKQKKGFMT |
| 1074 | P05547 | 38  | LKKQKKGFMTP |
| 1075 | P05547 | 47  | TPERKKKLRL  |
| 1076 | P05547 | 48  | PERKKKLRLLL |
| 1077 | P05547 | 74  | AGERRKIIDQR |
| 1078 | P05547 | 112 | QIESDKYDVEL |
| 1079 | P05547 | 122 | LEIIRKDYEIN |
| 1080 | P05547 | 139 | NDLRGKFIKPT |
| 1081 | O95785 | 279 | IYFKQKEHLL  |
| 1082 | O95785 | 332 | QASREKIIIEE |
| 1083 | O95785 | 357 | RLQCPKCVFGT |
| 1084 | O95785 | 756 | FQKKKKVANF  |
| 1085 | P05141 | 23  | AAAIKTAVAP  |
| 1086 | Q9Y232 | 31  | QKLFLKRNNVS |
| 1087 | Q9Y232 | 69  | ERIVDKRKNKK |
| 1088 | Q9Y232 | 71  | IVDKRKNKKGK |
| 1089 | Q9Y232 | 147 | NSNFSKTSPKA |
| 1090 | Q9Y232 | 151 | SKTSPKALVIG |
| 1091 | Q9Y232 | 175 | SQKFRKNTAPS |
| 1092 | Q9Y232 | 191 | NMDLAKSGIKI |
| 1093 | Q9Y232 | 200 | KILVPKSPVKS |
| 1094 | P26358 | 39  | DSLTEKECVKE |
| 1095 | O75530 | 76  | GKWKSCKCKYS |
| 1096 | O75530 | 106 | FNWHSKEGDPL |
| 1097 | Q5VTE0 | 212 | NMPWFKGWKVT |
| 1098 | Q5VTE0 | 244 | TRPTDKPLRLP |
| 1099 | P0CE47 | 90  | HADYVKNMITG |
| 1100 | P0CE47 | 177 | RGSALKALEGD |
| 1101 | P0CE47 | 358 | PGDNIKMVVTL |
| 1102 | O75367 | 12  | KKKSTKTSRSA |
| 1103 | O75367 | 116 | PELLAKKRGSK |
| 1104 | O75367 | 134 | TPPPAKKAKSP |
| 1105 | O75367 | 148 | KPVSKKAGGKK |
| 1106 | P62807 | 25  | TKAQKKGKRR  |
| 1107 | P62807 | 44  | SVYVYKVLKQV |
| 1108 | P62807 | 117 | VSEGTKAVTKY |
| 1109 | P62807 | 121 | TKAVTKYTSSK |
| 1110 | P62803 | 6   | MSGRGKGGKGL |

|      |        |     |              |
|------|--------|-----|--------------|
| 1111 | P62803 | 17  | GKGGAKRHRKV  |
| 1112 | P04637 | 291 | EENLRKKGEPH  |
| 1113 | P04637 | 292 | ENLRKKGEPHH  |
| 1114 | Q86L05 | 98  | GPKNKKAIKKL  |
| 1115 | Q86L05 | 130 | GPGLNKVGKFP  |
| 1116 | Q7M1B9 | 15  | SDFAEKVLKSK  |
| 1117 | P14909 | 33  | NVEKTKKIKII  |
| 1118 | P14909 | 95  | GTDVKKEEVIV  |
| 1119 | P14909 | 193 | SPNDVKKIVDI  |
| 1120 | P14909 | 220 | FVYEGKMRSTL  |
| 1121 | P14909 | 337 | VSKILKTSGFD  |
| 1122 | P14909 | 344 | SGFDVKSLAIK  |
| 1123 | P39462 | 24  | GVPKPKGPQVL  |
| 1124 | P39462 | 86  | VVGYSKGLVA   |
| 1125 | P39462 | 252 | LNNSEKTL SVY |
| 1126 | P39462 | 266 | LAKQGYVMVG   |
| 1127 | P22498 | 304 | TRGNEKIVRDD  |
| 1128 | P22498 | 374 | YDVLTKYWNRY  |
| 1129 | Q9Y232 | 219 | SESPEKLDPVE  |
| 1130 | Q9Y232 | 284 | LAVNGKGTSPF  |
| 1131 | P0C835 | 34  | APKGRKGVKIG  |
| 1132 | P80053 | 56  | SDGKCLKTFMGW |
| 1133 | P80053 | 118 | RVDPKCLTREE  |
| 1134 | P80053 | 130 | EQLSRKYIQAI  |
| 1135 | P80053 | 279 | YPEGRKVTNEE  |
| 1136 | P80053 | 309 | KFNAPKVKAKL  |
| 1137 | P80053 | 311 | NAPKVKAKLIV  |
| 1138 | P80053 | 360 | EWANNKMGEII  |
| 1139 | P80053 | 371 | SDEEAKKLIVD  |
| 1140 | P13123 | 28  | VWRVGMVSFT   |
| 1141 | P61991 | 19  | QVDISKIKKVV  |
| 1142 | P61991 | 28  | VWRVGMISFT   |
| 1143 | Q5VTE0 | 311 | DNVGFKVKNVS  |
| 1144 | P55907 | 21  | EHSCHKVYGPV  |
| 1145 | O43524 | 606 | VMGHEKFPSDL  |
| 1146 | Q08369 | 255 | NRPLIKPQRRL  |
| 1147 | Q08369 | 322 | RKRKPKNLNKS  |
| 1148 | Q08369 | 421 | SQASSKQDSWN  |
| 1149 | P16403 | 52  | AVAASKERSGV  |
| 1150 | P16403 | 81  | NNSRIKLGKLS  |
| 1151 | P16403 | 90  | KSLVSKGTLVQ  |
| 1152 | P16403 | 149 | GATPKKSAKKT  |
| 1153 | P16403 | 153 | KKSAKTPKKA   |
| 1154 | P10412 | 137 | AGAAKPKKAT   |
| 1155 | P10412 | 140 | AKKPKKATGAA  |
| 1156 | P10412 | 149 | AATPKKSAKKT  |
| 1157 | P16401 | 140 | AGATPKKAKKA  |
| 1158 | P16401 | 144 | PKKAKKAAGAK  |
| 1159 | P16401 | 157 | VKKTPKAKKP   |
| 1160 | O75367 | 159 | GARKSKKKQGE  |
| 1161 | P40283 | 7   | APKAEKPAEK   |
| 1162 | P40283 | 23  | KPVEEKSKAEK  |

|      |        |     |              |
|------|--------|-----|--------------|
| 1163 | P40283 | 25  | VEEKSKAEKAP  |
| 1164 | P40283 | 28  | KSKAEKAPAEK  |
| 1165 | O14979 | 216 | HKLDGKLLIDPK |
| 1166 | O14979 | 233 | GKEPPKKVFG   |
| 1167 | O14979 | 289 | EEPVKLLESR   |
| 1168 | Q14103 | 173 | DPKRAKAMTK   |
| 1169 | P16862 | 83  | LNSITKTQDWR  |
| 1170 | P16862 | 415 | IFIPEKPATSS  |
| 1171 | P16862 | 580 | DHNEPKLPKDK  |
| 1172 | P16862 | 641 | RSLNWKDMLGW  |
| 1173 | O00159 | 200 | SSRFGKYMDVQ  |
| 1174 | O00159 | 269 | YLYLVKGQCAK  |
| 1175 | O00159 | 357 | ALTHRKIIAKG  |
| 1176 | O00159 | 396 | TWLVGKINRSL  |
| 1177 | O00159 | 512 | LTFLEKLEDTV  |
| 1178 | O00159 | 632 | KPNDAKQPGRF  |
| 1179 | P13538 | 20  | APYLRKSEKER  |
| 1180 | P13538 | 60  | SKEGGKVTVKT  |
| 1181 | P13538 | 64  | GKVTVKTEGGE  |
| 1182 | P13538 | 74  | ETLTVKEDQVF  |
| 1183 | P13538 | 191 | KTVNTKRVIQY  |
| 1184 | P13538 | 237 | AFGNAKTVRND  |
| 1185 | P13538 | 249 | SSRFGKFIRIH  |
| 1186 | P13538 | 368 | GNLKFKQKQRE  |
| 1187 | Q96RI1 | 286 | QEITNKILKEE  |
| 1188 | Q96RI1 | 352 | AEIFNKKLPSG  |
| 1189 | Q96RI1 | 431 | LDVLQKLCCKIH |
| 1190 | P11940 | 78  | NFDVIKGGKPV  |
| 1191 | P11940 | 95  | DPSLRKSGVGN  |
| 1192 | P11940 | 138 | DENGSKGYGFV  |
| 1193 | P11940 | 268 | VGRAQKKVERQ  |
| 1194 | P11940 | 269 | GRAQKKVERQT  |
| 1195 | P06400 | 96  | YIQKKKELWGI  |
| 1196 | P06400 | 136 | FFNLLKEIDTS  |
| 1197 | P06400 | 202 | TFLLAKEVLQ   |
| 1198 | P06400 | 289 | NIDEVKNVYFK  |
| 1199 | P06400 | 294 | KNVYFKNFIPF  |
| 1200 | P06400 | 359 | QRTPRKSNLDE  |
| 1201 | Q86L05 | 161 | KFQLKKVLCLA  |
| 1202 | Q86L05 | 202 | GWQNIKTLYVK  |
| 1203 | P0CX43 | 14  | VREHVKELLKY  |
| 1204 | P0CX43 | 207 | GSLVVKSSMGP  |
| 1205 | P47914 | 38  | KGVDPKFLRM   |
| 1206 | P47914 | 82  | KPKEVKPKIPK  |
| 1207 | P47914 | 103 | YIAHPKLGKRA  |
| 1208 | P47914 | 122 | RLCRPKAKAKA  |
| 1209 | Q969Q0 | 28  | VTQYKKGKDSL  |
| 1210 | P0CX27 | 61  | PVFHKKAKTTK  |
| 1211 | P0CX27 | 67  | AKTTKVVVLR   |
| 1212 | P0CX27 | 97  | ELGGEKKQKGQ  |
| 1213 | P02393 | 58  | PAEEEEKTEFDV |
| 1214 | P0A7K2 | 52  | EAAEEKTEFDV  |

|      |        |     |               |
|------|--------|-----|---------------|
| 1215 | P0A7K2 | 85  | GLKEAKDLVES   |
| 1216 | P07472 | 112 | DEAKTKLEEAG   |
| 1217 | Q04207 | 28  | IIEQPKQRGMR   |
| 1218 | Q04207 | 303 | IEEKRKRTYET   |
| 1219 | Q53688 | 147 | LLKIVKDGDEY   |
| 1220 | Q53688 | 158 | FLEYFKWKLPL   |
| 1221 | Q53688 | 160 | EYFKWKLPLTE   |
| 1222 | Q53688 | 248 | LRSI IKNKII I |
| 1223 | Q53688 | 358 | ANQIVKECDKT   |
| 1224 | Q53688 | 390 | PAVYAKAYEDT   |
| 1225 | E5KWG9 | 191 | GVFEEKGVRAI   |
| 1226 | E5KWG9 | 211 | SEELLKFCERS   |
| 1227 | E5KWG9 | 229 | SWDSPKINRFT   |
| 1228 | B6A879 | 121 | PDVNFKEDGSQ   |
| 1229 | B6A879 | 291 | RELQKKAHAMG   |
| 1230 | B6A879 | 445 | NLYSPKDPGEQ   |
| 1231 | Q9L5X8 | 28  | TTLVDKLLQQS   |
| 1232 | Q9L5X8 | 480 | HYGPHKGGNIG   |
| 1233 | Q9L5X8 | 499 | ANAAGKALTNA   |
| 1234 | Q6NC90 | 132 | RLKPLKPGKGF   |
| 1235 | Q6NC90 | 135 | PLKPGKGFGEI   |
| 1236 | D0ZRV8 | 36  | RLRVRKYRDPQ   |
| 1237 | D0ZRV8 | 53  | LPESLKALLAY   |
| 1238 | D0ZRV8 | 190 | HLPQWKAQOKM   |
| 1239 | Q6NEZ3 | 145 | INDHLKASLEG   |
| 1240 | Q9UKV3 | 213 | SISEEKGDSDD   |
| 1241 | Q9UKV3 | 305 | ILKEFKKEEGEE  |
| 1242 | Q9SJU4 | 61  | LVKTAKTIASP   |
| 1243 | Q9SJU4 | 186 | GARFAKWRTVV   |
| 1244 | Q9SJU4 | 203 | SALAVKEAAWG   |
| 1245 | Q9ZU52 | 288 | TLTMLKRRVPP   |
| 1246 | P62157 | 31  | GTITTTKELGTV  |
| 1247 | P04573 | 14  | LGPEEKDECMK   |
| 1248 | P00889 | 49  | EQARIKTFRQQ   |
| 1249 | P00889 | 109 | MLPKAKGGEEP   |
| 1250 | P00889 | 139 | VSWLSKEWAKR   |
| 1251 | P00889 | 382 | VAQLYKIVPNV   |
| 1252 | P00078 | 98  | FAGMKKPQERA   |
| 1253 | P00043 | 61  | TDANKKKGVEW   |
| 1254 | P00043 | 62  | DANKKKGVEWS   |
| 1255 | P00070 | 31  | CHTVEKGAGHK   |
| 1256 | P00070 | 96  | FPGLKKPQERA   |
| 1257 | P00047 | 35  | QGGANKIGPNL   |
| 1258 | P00047 | 47  | GLFGRKTGSVE   |
| 1259 | Q71V39 | 212 | NMPWFKGWKVE   |
| 1260 | P02993 | 212 | RLPWYKGWNIE   |
| 1261 | P02994 | 210 | NAPWYKGWEKE   |
| 1262 | P02994 | 222 | KAGVVKGKTLL   |
| 1263 | Q96KQ7 | 341 | SSGRRKAKKKW   |
| 1264 | Q96KQ7 | 358 | VKPSRKRRKRE   |
| 1265 | P53991 | 38  | PVAATKASTAV   |
| 1266 | P53991 | 170 | EDPAKKGLCSN   |

|      |        |     |                               |
|------|--------|-----|-------------------------------|
| 1267 | P07041 | 116 | CAIHA <b>K</b> RVTIQ          |
| 1268 | P10587 | 11  | LSDDE <b>K</b> FLFVD          |
| 1269 | P10587 | 72  | KVTL <b>S</b> KDDIQK          |
| 1270 | P68696 | 91  | GVITV <b>K</b> TSKSI          |
| 1271 | P11416 | 86  | LPRIY <b>K</b> PCFVC          |
| 1272 | P11416 | 147 | YCRLQ <b>K</b> CFDVG          |
| 1273 | P11416 | 164 | RNDRN <b>K</b> KKKEA          |
| 1274 | P27063 | 6   | PQTET <b>K</b> ASVGF          |
| 1275 | P27064 | 81  | SLDRY <b>K</b> GRCYG          |
| 1276 | P27064 | 177 | CTIK <b>P</b> KLGLSA          |
| 1277 | P27064 | 183 | LGL <b>S</b> A <b>K</b> NYGRA |
| 1278 | P27064 | 334 | GT <b>V</b> V <b>G</b> KLEGER |
| 1279 | P27064 | 356 | DDFVE <b>K</b> DRSRG          |
| 1280 | P27064 | 450 | IREAS <b>K</b> WSPEL          |
| 1281 | P04717 | 8   | PQTET <b>K</b> AKVGF          |
| 1282 | P04992 | 146 | PPAYV <b>K</b> TFQGP          |
| 1283 | P0A7J7 | 72  | F'TFVT <b>K</b> TPPAA         |
| 1284 | Q5SLP6 | 90  | EKG <b>A</b> H <b>K</b> PGREK |
| 1285 | P0CX53 | 31  | AALAP <b>K</b> IGPLG          |
| 1286 | P0CX53 | 93  | PPRDR <b>K</b> KDKNV          |
| 1287 | P0CX53 | 94  | PRDR <b>K</b> KDKNVK          |
| 1288 | P0CX53 | 119 | RQMRD <b>K</b> SFGRT          |
| 1289 | P0CX53 | 146 | CRVDF <b>K</b> NPHDI          |
| 1290 | P62986 | 6   | MQIFV <b>K</b> TLTGK          |
| 1291 | P55072 | 112 | DVKY <b>G</b> KRIHVL          |
| 1292 | P55072 | 148 | YRPIR <b>K</b> GDIFL          |
| 1293 | P55072 | 295 | FEEAE <b>K</b> NAPAI          |
| 1294 | P05547 | 12  | AEEA <b>K</b> KKQDDI          |
| 1295 | P05547 | 68  | KEQER <b>K</b> AGERR          |
| 1296 | P05547 | 84  | RCGQ <b>P</b> KNLDGA          |
| 1297 | O95785 | 179 | VEDTP <b>K</b> TLDMA          |
| 1298 | O95785 | 385 | PGQTT <b>K</b> EPFGG          |
| 1299 | O95785 | 610 | AALEL <b>K</b> QAFRE          |
| 1300 | O95785 | 641 | IVLV <b>A</b> KLGPQV          |
| 1301 | O95785 | 697 | PAMAL <b>K</b> HEERK          |
| 1302 | P05141 | 63  | VVRIP <b>K</b> EQGVL          |
| 1303 | P05141 | 147 | AADV <b>G</b> KAGAER          |
| 1304 | P05141 | 268 | RDEGG <b>K</b> AFFKG          |
| 1305 | Q9Y232 | 76  | KNKK <b>G</b> KTEYLV          |
| 1306 | Q9Y232 | 195 | AKSGI <b>K</b> ILVPK          |
| 1307 | P00042 | 85  | YIPGT <b>K</b> MAFGG          |
| 1308 | P00042 | 92  | AFGGL <b>K</b> KEKDR          |
| 1309 | P26358 | 43  | EKECV <b>K</b> EKLNL          |
| 1310 | P26358 | 134 | PKPL <b>S</b> KPRTPR          |
| 1311 | O75530 | 22  | AAK <b>K</b> Q <b>K</b> LSSDE |
| 1312 | O75530 | 74  | GKG <b>K</b> W <b>K</b> SKKCK |
| 1313 | O75530 | 211 | LLSV <b>S</b> KDHALR          |
| 1314 | O75530 | 332 | AIVCW <b>K</b> PGKME          |
| 1315 | Q5VTE0 | 44  | IEK <b>F</b> E <b>K</b> EAAEM |
| 1316 | Q5VTE0 | 64  | VLD <b>K</b> L <b>K</b> AERER |
| 1317 | P0CE47 | 25  | HVD <b>H</b> G <b>K</b> TTLTA |
| 1318 | P0CE47 | 295 | GQVL <b>A</b> KPGTIK          |

|      |        |     |                      |
|------|--------|-----|----------------------|
| 1319 | O75367 | 9   | RGGKK <b>K</b> STKTS |
| 1320 | O75367 | 34  | LRYIK <b>K</b> GHPKY |
| 1321 | O75367 | 72  | AARDN <b>K</b> KGRVT |
| 1322 | O75367 | 135 | PPPAK <b>K</b> AKSPS |
| 1323 | P62807 | 6   | MPEPA <b>K</b> SAPAP |
| 1324 | P68432 | 116 | CAIHA <b>K</b> RVTIM |
| 1325 | P09988 | 116 | CAIHG <b>K</b> RVTIQ |
| 1326 | Q55BN9 | 65  | ELLI <b>K</b> KLPFQR |
| 1327 | P61830 | 57  | IRRFQ <b>K</b> STELL |
| 1328 | P61830 | 123 | VTIQ <b>K</b> KDIKLA |
| 1329 | P62803 | 13  | GKGLG <b>K</b> GGAKR |
| 1330 | P04637 | 101 | SVPSQ <b>K</b> TYQGS |
| 1331 | P04637 | 132 | SPALN <b>K</b> MFQCL |
| 1332 | P04637 | 321 | POP <b>K</b> KPLDGE  |
| 1333 | Q86L05 | 18  | VSOLF <b>K</b> EAQES |
| 1334 | Q86L05 | 24  | EAQES <b>K</b> RGFLE |
| 1335 | Q86L05 | 102 | KKAI <b>K</b> KLSSKY |
| 1336 | P80322 | 44  | LGTIM <b>K</b> RLGMS |
| 1337 | P80322 | 153 | DYEEW <b>K</b> EIQE  |
| 1338 | P14909 | 166 | DDLQ <b>S</b> KISKRT |
| 1339 | P14909 | 281 | TSFVQ <b>K</b> AAVKA |
| 1340 | P14909 | 334 | FPNV <b>S</b> KILKTS |
| 1341 | P14909 | 349 | KSLAI <b>K</b> LIEEK |
| 1342 | P39462 | 31  | PQVLI <b>K</b> VEAAG |
| 1343 | P39462 | 61  | EDLGV <b>K</b> LPVTL |
| 1344 | P39462 | 172 | SLDPT <b>K</b> TLLVV |
| 1345 | P39462 | 192 | AVQIA <b>K</b> AVSGA |
| 1346 | P39462 | 320 | KPMIT <b>K</b> TMKLE |
| 1347 | P39462 | 323 | ITK <b>T</b> MKLEEAN |
| 1348 | P22498 | 219 | GYVGV <b>K</b> SGFPP |
| 1349 | P22498 | 255 | IKSV <b>S</b> KKPVGI |
| 1350 | Q9Y232 | 388 | AADD <b>S</b> KLVLLS |
| 1351 | Q9Y232 | 417 | LTDDR <b>K</b> RESTK |
| 1352 | Q9Y232 | 422 | KREST <b>K</b> MAEAI |
| 1353 | P0C835 | 37  | GRKGV <b>K</b> IGLFK |
| 1354 | P0C835 | 42  | KIGLF <b>K</b> DPETG |
| 1355 | P80053 | 202 | VATIA <b>K</b> EAANK |
| 1356 | P80053 | 239 | SEMG <b>A</b> KIVGVS |
| 1357 | P80053 | 247 | GVSD <b>S</b> KGGVIN |
| 1358 | Q5VTE0 | 385 | DRRS <b>G</b> KKLEDG |
| 1359 | P00219 | 10  | NYRT <b>S</b> KPVVGD |
| 1360 | O43524 | 176 | ESSPD <b>K</b> RLTLS |
| 1361 | O43524 | 197 | PYFKD <b>K</b> GDSNS |
| 1362 | O43524 | 360 | SPSV <b>S</b> KPCTVE |
| 1363 | P16403 | 17  | APPAE <b>K</b> APVKK |
| 1364 | P16403 | 22  | KAPV <b>K</b> KKAACK |
| 1365 | P16403 | 23  | APV <b>K</b> KKAACKA |
| 1366 | P16403 | 46  | SELIT <b>K</b> AVAAS |
| 1367 | P16403 | 85  | IKLGL <b>K</b> SLVSK |
| 1368 | P16403 | 109 | SFKLN <b>K</b> KAASG |
| 1369 | P16403 | 121 | AKPKV <b>K</b> KAGGT |
| 1370 | P16403 | 137 | VGA <b>A</b> KPKKAA  |

|      |        |     |                                                          |
|------|--------|-----|----------------------------------------------------------|
| 1371 | P16403 | 148 | GGATP <b>K</b> KSAKK                                     |
| 1372 | P16403 | 157 | KKTP <b>K</b> KAKKPA                                     |
| 1373 | P10412 | 117 | ASGEA <b>K</b> PKAKK                                     |
| 1374 | P16401 | 55  | AVAAS <b>K</b> ERNGL                                     |
| 1375 | O75367 | 189 | TVLST <b>K</b> SLFLG                                     |
| 1376 | P40283 | 12  | KKPAE <b>K</b> KPASE                                     |
| 1377 | P40283 | 34  | APA <b>E</b> K <b>K</b> PKAGK                            |
| 1378 | P40283 | 51  | GAGGD <b>K</b> KKKMK                                     |
| 1379 | P40283 | 53  | GGD <b>K</b> KKMKKK                                      |
| 1380 | P40283 | 56  | KK <b>K</b> KK <b>K</b> KSVE                             |
| 1381 | Q42681 | 64  | ELVIR <b>K</b> L <b>P</b> F <b>Q</b> R                   |
| 1382 | Q41811 | 13  | GKGL <b>G</b> K <b>G</b> ARKR                            |
| 1383 | O14979 | 180 | VDCTI <b>K</b> TD <b>P</b> V <b>T</b>                    |
| 1384 | O14979 | 204 | AASVD <b>K</b> VLE <b>L</b> K                            |
| 1385 | O14979 | 227 | RAKAL <b>G</b> K <b>E</b> PP                             |
| 1386 | O14979 | 229 | KAL <b>G</b> K <b>E</b> PP <b>K</b> K                    |
| 1387 | O14979 | 306 | GKCEI <b>K</b> V <b>A</b> Q <b>P</b> K                   |
| 1388 | O14979 | 311 | KVAQ <b>P</b> K <b>E</b> VY <b>R</b> Q                   |
| 1389 | Q14103 | 114 | TKKDL <b>K</b> DY <b>F</b> SK                            |
| 1390 | Q14103 | 161 | DQKEH <b>K</b> L <b>N</b> G <b>K</b> V                   |
| 1391 | Q14103 | 165 | HKL <b>N</b> G <b>K</b> V <b>I</b> DP <b>K</b>           |
| 1392 | Q14103 | 238 | E <b>E</b> P <b>V</b> K <b>K</b> I <b>M</b> E <b>K</b> K |
| 1393 | Q14103 | 260 | KVAMS <b>K</b> E <b>O</b> Y <b>Q</b> Q                   |
| 1394 | P16862 | 25  | SVQSY <b>K</b> AA <b>I</b> D <b>F</b>                    |
| 1395 | P16862 | 66  | LRPDE <b>K</b> I <b>N</b> K <b>N</b> V                   |
| 1396 | P16862 | 150 | NAVST <b>K</b> P <b>T</b> PP <b>P</b>                    |
| 1397 | P16862 | 168 | SGLSS <b>K</b> V <b>H</b> S <b>Y</b> T                   |
| 1398 | P16862 | 438 | HRSRG <b>K</b> R <b>T</b> T <b>I</b> V                   |
| 1399 | O00159 | 146 | ESGAG <b>K</b> TE <b>A</b> T <b>K</b>                    |
| 1400 | O00159 | 188 | AFGNA <b>K</b> T <b>L</b> R <b>N</b> D                   |
| 1401 | O00159 | 209 | VQFDF <b>K</b> G <b>A</b> P <b>V</b> G                   |
| 1402 | O00159 | 535 | DQ <b>R</b> TR <b>K</b> S <b>L</b> G <b>R</b> G          |
| 1403 | O00159 | 594 | SELSD <b>K</b> K <b>R</b> P <b>E</b> T                   |
| 1404 | P13538 | 147 | LAYRG <b>K</b> K <b>R</b> Q <b>E</b> A                   |
| 1405 | P13538 | 148 | AYRG <b>K</b> K <b>R</b> Q <b>E</b> A <b>P</b>           |
| 1406 | P13538 | 186 | ESGAG <b>K</b> T <b>V</b> N <b>T</b> K                   |
| 1407 | P13538 | 296 | Q <b>I</b> M <b>S</b> N <b>K</b> K <b>P</b> E <b>L</b> I |
| 1408 | P13538 | 349 | FSADE <b>K</b> T <b>A</b> I <b>Y</b> K                   |
| 1409 | Q96RI1 | 33  | EMMS <b>M</b> K <b>P</b> A <b>K</b> G <b>V</b>           |
| 1410 | Q96RI1 | 120 | EMP <b>V</b> T <b>K</b> K <b>P</b> R <b>M</b> G          |
| 1411 | Q96RI1 | 198 | RLR <b>K</b> C <b>K</b> E <b>M</b> G <b>M</b> L          |
| 1412 | Q96RI1 | 218 | TEI <b>Q</b> C <b>K</b> S <b>K</b> R <b>L</b> R          |
| 1413 | Q96RI1 | 256 | KSCRE <b>K</b> TE <b>L</b> T <b>P</b>                    |
| 1414 | Q96RI1 | 413 | DRQYI <b>K</b> D <b>R</b> E <b>A</b> V                   |
| 1415 | Q96RI1 | 420 | REAVE <b>K</b> L <b>Q</b> E <b>P</b> L                   |
| 1416 | P11940 | 177 | RFK <b>S</b> R <b>K</b> E <b>R</b> E <b>A</b> E          |
| 1417 | P11940 | 188 | LGAR <b>A</b> K <b>E</b> F <b>T</b> N <b>V</b>           |
| 1418 | P11940 | 208 | DDER <b>L</b> K <b>D</b> L <b>F</b> G <b>K</b>           |
| 1419 | P11940 | 279 | TEL <b>K</b> R <b>K</b> F <b>E</b> Q <b>M</b> K          |
| 1420 | P11940 | 284 | K <b>F</b> E <b>Q</b> M <b>K</b> Q <b>D</b> R <b>I</b> T |
| 1421 | P06400 | 240 | L <b>K</b> E <b>P</b> Y <b>K</b> T <b>A</b> V <b>I</b> P |
| 1422 | P06400 | 420 | IL <b>K</b> R <b>V</b> K <b>D</b> I <b>G</b> Y <b>I</b>  |



|      |        |     |              |
|------|--------|-----|--------------|
| 1423 | Q86L05 | 160 | VKFQLKKVLCL  |
| 1424 | Q86L05 | 196 | VSLLLKKGWQNI |
| 1425 | P0CX43 | 24  | YSNETKKRNFL  |
| 1426 | P0CX43 | 25  | SNETKKRNFL   |
| 1427 | P0CX43 | 101 | NKKLIKKLSKK  |
| 1428 | P0CX43 | 106 | KKLSKKYNAFI  |
| 1429 | P0CX43 | 147 | DDLKYGKVTDVR |
| 1430 | P0CX43 | 195 | FVSLLLKKNWQN |
| 1431 | P47914 | 33  | RYESLKGVDPK  |
| 1432 | P47914 | 51  | AKKHNNKGLKK  |
| 1433 | P47914 | 79  | ALVKPKKEVKPK |
| 1434 | P47914 | 84  | KEVKPKIPKGV  |
| 1435 | Q969Q0 | 17  | CKKCGKHQPHK  |
| 1436 | Q969Q0 | 61  | FRKKAKTTKKI  |
| 1437 | P0CX27 | 15  | TYCKGKTCRKH  |
| 1438 | P0CX27 | 86  | AQLTLKRCKHF  |
| 1439 | P0CX27 | 100 | GEKKQKGOALQ  |
| 1440 | P02393 | 107 | KEAVSKEEAEE  |
| 1441 | P0A7K2 | 71  | KVAVIKAVRGA  |
| 1442 | P0A7K2 | 101 | KEGVSKDDAEA  |
| 1443 | P07472 | 68  | SAGEKKNVIK   |
| 1444 | P07472 | 87  | GLKEAKAAVDG  |
| 1445 | Q12962 | 161 | SLAAQKFISDI  |
| 1446 | Q04207 | 195 | NTAELKICRVN  |
| 1447 | Q04207 | 218 | FLLCDKVQKED  |
| 1448 | Q04207 | 314 | FKSIMKKSPFN  |
| 1449 | Q53688 | 256 | IIIVEKILGFQ  |
| 1450 | B6A879 | 107 | ILVEDKYTEET  |
| 1451 | B6A879 | 212 | IGNKSKKVQEV  |
| 1452 | B6A879 | 213 | GNKSKKVQEVW  |
| 1453 | B6A879 | 567 | RTVKQKGEYAA  |
| 1454 | B6A879 | 573 | GEYAAKNKLG   |
| 1455 | Q9L5X8 | 8   | TPQIDKLRNIA  |
| 1456 | Q9L5X8 | 543 | TVNALKKGQLT  |
| 1457 | Q6NEZ3 | 41  | DTQAPKPVNTV  |
| 1458 | Q6NEZ3 | 62  | AWGLYKFNQKS  |
| 1459 | Q6NEZ3 | 226 | ESASIKQDVQI  |
| 1460 | Q6NEZ3 | 332 | ATSLLLKPAKVM |
| 1461 | Q9UKV3 | 44  | WRKLPKMPEAV  |
| 1462 | Q9UKV3 | 238 | QARAAKLSEGS  |
| 1463 | Q9UKV3 | 294 | DDEGQKSREAP  |
| 1464 | P18281 | 47  | LEEVAKPHELK  |
| 1465 | Q9SJU4 | 82  | NATCGKRLASI  |
| 1466 | Q9SJU4 | 147 | IVPGIKVDKGL  |
| 1467 | Q9SJU4 | 268 | EGILLKPSMVT  |
| 1468 | Q9SJU4 | 353 | KTWGGKEENVK  |
| 1469 | Q9ZU52 | 50  | SDELVKTAKSI  |
| 1470 | P11118 | 87  | TEEEIKEAFRV  |
| 1471 | P00889 | 76  | GMRGMKGLVYE  |
| 1472 | P00889 | 193 | GIHRTKYWELI  |
| 1473 | P00889 | 215 | PCVAAKIYRNL  |
| 1474 | P00063 | 19  | GEKIFKTKCAQ  |

|      |        |     |              |
|------|--------|-----|--------------|
| 1475 | P00063 | 30  | CHTVDKGAGHK  |
| 1476 | P00063 | 87  | YIPGTKMVFPG  |
| 1477 | P00077 | 16  | PGDAAKGEKIF  |
| 1478 | P00043 | 12  | KGSEKKGANLF  |
| 1479 | P00043 | 94  | FGGLKKAKDRN  |
| 1480 | P00076 | 22  | CHSAQKGVNST  |
| 1481 | P00076 | 52  | YSNANKNAAIV  |
| 1482 | P00076 | 87  | AGIKAKKDRQD  |
| 1483 | P00070 | 62  | YSAGNKNKAVI  |
| 1484 | P00047 | 95  | FGGLKKNKDRN  |
| 1485 | Q71V39 | 219 | WKVERKEGNAS  |
| 1486 | P02993 | 44  | IEKFEKEAQEM  |
| 1487 | P02993 | 51  | AQEMGKGSFKY  |
| 1488 | P02994 | 214 | YKGWEKETKAG  |
| 1489 | P02994 | 224 | GVVKGKTLLEA  |
| 1490 | Q96KQ7 | 343 | GRRKAKKKWRK  |
| 1491 | Q96KQ7 | 345 | RKAKKKWRKDS  |
| 1492 | Q96KQ7 | 368 | EPPRAKEPRGV  |
| 1493 | P53991 | 6   | MASLRKPSNHA  |
| 1494 | P53991 | 234 | NVPSYKFTGLF  |
| 1495 | P53991 | 285 | NRKGGKMYIQD  |
| 1496 | P10587 | 17  | FLFVDKNFVNN  |
| 1497 | P10587 | 145 | MYKGGKRHEMP  |
| 1498 | P10587 | 202 | VASSHKGKKDT  |
| 1499 | P11416 | 118 | RRSIQKNMVYT  |
| 1500 | P11416 | 165 | NDRNKKKEAP   |
| 1501 | P11416 | 167 | RNKKKKEAPKP  |
| 1502 | P27064 | 161 | QVERDKLNKYG  |
| 1503 | P27064 | 305 | VIDRQKNHGMH  |
| 1504 | P04717 | 227 | AEAIYKSQAET  |
| 1505 | P04717 | 355 | RDDYIKKDRSR  |
| 1506 | P04992 | 236 | ETGEIKGHYLK  |
| 1507 | P04992 | 241 | KGHYLKATAGT  |
| 1508 | P0A7J7 | 87  | KAAGIKSGSGK  |
| 1509 | P0A7J7 | 95  | SGKPNKDKVGK  |
| 1510 | P0CX53 | 130 | LASVTKEILGT  |
| 1511 | P62986 | 88  | RQLAQKYNCDK  |
| 1512 | P55072 | 109 | PCPDVKYGKRI  |
| 1513 | P05547 | 13  | EEAKKKQDDID  |
| 1514 | P05547 | 56  | LLLRKKAEEEL  |
| 1515 | P05547 | 62  | AAEELKKEQER  |
| 1516 | O95785 | 550 | QLGRNKSTVHP  |
| 1517 | O95785 | 753 | RFSFQKKKKKV  |
| 1518 | O95785 | 755 | SFQKKKKKVVAN |
