# Supplementary material for: iMethyl-PseAAC: Identification of Protein Methylation Sites via a Pseudo Amino Acid Composition Approach
Source: Hindawi journal article supplement (doi:10.1155/2014/947416), 2014-01-01
Supplement: f1 [file 947416.f1.zip]

## Online Supporting Information S1. An analysis of the benchmark dataset used in Hu et al. (Biopolymers, 2011, 95, 763-771)

### I. Arg-methylation dataset

(A) Of the 180 samples in their learning positive dataset, the following 5 pairs contain a duplicate sequence

| Pair # | Protein | Site | Protein | Site | Duplicate sequence |
|--------|---------|------|---------|------|--------------------|
| 1      | P02686  | 241  | P02688  | 131  | SQGKGRGLSLS        |
| 2      | P08199  | 656  | P08199  | 666  | GGFGRGGGRG         |
| 3      | P08199  | 660  | P08199  | 674  | GRGGRGGFGG         |
| 4      | P04256  | 194  | P09651  | 194  | ASSQRGRSGS         |
| 5      | Q92804  | 483  | Q92804  | 570  | GYGGDRGGYGG        |

(B) Of the 2,171 samples in their learning negative dataset, the following 64 pairs contain a duplicate sequence

| Pair # | Protein | Site | Protein | Site | Duplicate sequence |
|--------|---------|------|---------|------|--------------------|
| 1      | P02686  | 139  | P02688  | 6    | MASQKRPSQRH        |
| 2      | P02686  | 143  | P02688  | 10   | KRPSQRHGSKY        |
| 3      | P02686  | 159  | P02688  | 26   | TMDHARHGFLP        |
| 4      | P02686  | 165  | P02688  | 32   | HGFLPRHRDTG        |
| 5      | P02686  | 167  | P02688  | 34   | FLPRHRDTGIL        |
| 6      | P02686  | 231  | P02688  | 121  | NIVTPRTPPPS        |
| 7      | P02686  | 247  | P02688  | 137  | GLSLSRFSWGA        |
| 8      | P02686  | 264  | P02688  | 154  | FGYGRASDYK         |
| 9      | P02686  | 293  | P02688  | 184  | FKLGGDRSRSG        |
| 10     | P02686  | 296  | P02688  | 187  | GGRDSRSGSPM        |
| 11     | P02686  | 303  | P02688  | 194  | GSPMARR----        |
| 12     | P02686  | 304  | P02688  | 195  | SPMARR-----        |
| 13     | Q07955  | 210  | Q07955  | 212  | SRSRSRFRSRS        |
| 14     | Q07955  | 210  | Q07955  | 214  | SRSRSRFRSRS        |
| 15     | P04264  | 199  | P08729  | 110  | FIDKVRFLFQQ        |
| 16     | P04256  | 14   | P09651  | 14   | EPEQLRKLFIG        |
| 17     | P04256  | 31   | P09651  | 31   | TDESLRSHFEQ        |
| 18     | P04256  | 47   | P09651  | 47   | DCVVMRDPNTK        |
| 19     | P04256  | 53   | P09651  | 53   | DPNTKRSRGFG        |
| 20     | P04256  | 55   | P09651  | 55   | NTKRSRGGFV         |
| 21     | P04256  | 75   | P09651  | 75   | AAMNARPHKVD        |
| 22     | P04256  | 82   | P09651  | 82   | HKVDGRVVEPK        |
| 23     | P04256  | 88   | P09651  | 88   | VVEPKRAVSRE        |
| 24     | P04256  | 92   | P09651  | 92   | KRAVSREDSQR        |
| 25     | P04256  | 97   | P09651  | 97   | REDSQRPGAHL        |
| 26     | P04256  | 122  | P09651  | 122  | EEHHLRDFEQ         |

|    |        |     |        |     |              |
|----|--------|-----|--------|-----|--------------|
| 27 | P04256 | 140 | P09651 | 140 | EIMTDRGSGKK  |
| 28 | P04256 | 146 | P09651 | 146 | GSGKKRGFAFV  |
| 29 | P04256 | 196 | P09651 | 196 | SSQRGRSGSGN  |
| 30 | P04256 | 218 | P09651 | 218 | NDNFGRGGNFS  |
| 31 | P04256 | 232 | P09651 | 232 | GFGGSRGGGGY  |
| 32 | P04256 | 284 | P09651 | 336 | GNFGGRSSGPY  |
| 33 | P04256 | 300 | P09651 | 352 | YFAKPRNQGGY  |
| 34 | P04256 | 318 | P09651 | 370 | SYGSGRRF---  |
| 35 | P04256 | 319 | P09651 | 371 | YGSGRRF----  |
| 36 | P11940 | 44  | Q13310 | 44  | SIRVCRDMITR  |
| 37 | P11940 | 49  | Q13310 | 49  | RDMITRRSLGY  |
| 38 | P11940 | 50  | Q13310 | 50  | DMITRRSLGYA  |
| 39 | P11940 | 67  | Q13310 | 67  | PADAERALDTM  |
| 40 | P11940 | 89  | Q13310 | 89  | IMWSQRDPSLR  |
| 41 | P11940 | 94  | Q13310 | 94  | RDPSLRKSGVG  |
| 42 | P11940 | 166 | Q13310 | 166 | MLLNDRKVFVG  |
| 43 | P11940 | 172 | Q13310 | 172 | KVFGVGRFKSRK |
| 44 | P11940 | 176 | Q13310 | 176 | GRFKSRKEREK  |
| 45 | P11940 | 179 | Q13310 | 179 | KSRKEREAEELG |
| 46 | P11940 | 565 | Q13310 | 574 | QMLGERLFPPLI |
| 47 | P11940 | 604 | Q13310 | 613 | SPESLRSKVDE  |
| 48 | Q13151 | 139 | P22626 | 153 | QSGKKRGFGFV  |
| 49 | P70372 | 277 | P26378 | 330 | NVKVIRDFNTN  |
| 50 | Q92804 | 422 | Q92804 | 450 | GYGGDRSGGGY  |
| 51 | Q92804 | 459 | Q92804 | 467 | GYGGDRGGGYG  |
| 52 | Q92804 | 459 | Q92804 | 475 | GYGGDRGGGYG  |
| 53 | Q92804 | 459 | Q92804 | 490 | GYGGDRGGGYG  |
| 54 | P31942 | 84  | P31943 | 179 | ERIGHRYIEIF  |
| 55 | Q92804 | 422 | Q92804 | 553 | GYGGDRSGGGY  |
| 56 | Q92804 | 459 | Q92804 | 562 | GYGGDRGGGYG  |
| 57 | Q06787 | 245 | P51114 | 245 | NIQQARKVPGV  |
| 58 | Q13283 | 13  | Q9UN86 | 13  | PLLVGREFVRQ  |
| 59 | Q13283 | 17  | Q9UN86 | 17  | GRFVRQYYTL   |
| 60 | Q13283 | 78  | Q9UN86 | 78  | CHTKIRHVDAH  |
| 61 | P04256 | 14  | P51991 | 35  | EPEQLRKLFIG  |
| 62 | P04256 | 82  | P51991 | 103 | HKVDGRVVEPK  |
| 63 | P04256 | 88  | P51991 | 109 | VVEPKRAVSRE  |
| 64 | Q13283 | 407 | Q9UN86 | 401 | FRGEVRLNVEE  |

(C) Of the 10 samples in their testing positive dataset, the following 3 pairs contain a duplicate sequence

| Pair # | Protein | Site | Protein | Site | Duplicate sequence |
|--------|---------|------|---------|------|--------------------|
| 1      | P81558  | 107  | P02687  | 106  | SQKGRGLSLS         |
| 2      | P81558  | 107  | P83487  | 108  | SQKGRGLSLS         |
| 3      | P81558  | 107  | P06906  | 107  | SQKGRGLSLS         |

(D) Of the 206 samples in their testing negative dataset, the following 46 pairs contain a duplicate sequence

| Pair # | Protein | Site | Protein | Site | Duplicate sequence |
|--------|---------|------|---------|------|--------------------|
| 1      | P25274  | 5    | P81558  | 5    | -ASQKRPSQRH        |
| 2      | P25274  | 9    | P81558  | 9    | KRPSQRHGSKY        |
| 3      | P25274  | 25   | P81558  | 25   | TMDHARHGFLP        |
| 4      | P25274  | 31   | P81558  | 31   | HGFLPRHRDTG        |
| 5      | P25274  | 25   | P02687  | 23   | TMDHARHGFLP        |
| 6      | P25274  | 31   | P02687  | 29   | HGFLPRHRDTG        |
| 7      | P25274  | 33   | P02687  | 31   | FLPRHRDTGIL        |
| 8      | P25274  | 54   | P81558  | 53   | RGAPKRGSGKD        |
| 9      | P25274  | 54   | P02687  | 52   | RGAPKRGSGKD        |
| 10     | P81558  | 64   | P02687  | 63   | GHHAARTTHYG        |
| 11     | P25274  | 95   | P81558  | 97   | NIVTPRTPPPS        |
| 12     | P25274  | 95   | P02687  | 96   | NIVTPRTPPPS        |
| 13     | P81558  | 113  | P02687  | 112  | GLSLSRFSWGA        |
| 14     | P25274  | 157  | P81558  | 160  | FKLGGDRSRSG        |
| 15     | P25274  | 160  | P81558  | 163  | GGRDSRSGSPM        |
| 16     | P25274  | 157  | P02687  | 158  | FKLGGDRSRSG        |
| 17     | P25274  | 167  | P81558  | 170  | GSPMARR----        |
| 18     | P25274  | 160  | P02687  | 161  | GGRDSRSGSPM        |
| 19     | P25274  | 168  | P81558  | 171  | SPMARR-----        |
| 20     | P25274  | 167  | P02687  | 168  | GSPMARR----        |
| 21     | P25274  | 5    | P83487  | 5    | -ASQKRPSQRH        |
| 22     | P25274  | 168  | P02687  | 169  | SPMARR-----        |
| 23     | P25274  | 9    | P83487  | 9    | KRPSQRHGSKY        |
| 24     | P25274  | 5    | P06906  | 5    | -ASQKRPSQRH        |
| 25     | P25274  | 25   | P83487  | 25   | TMDHARHGFLP        |
| 26     | P25274  | 9    | P06906  | 9    | KRPSQRHGSKY        |
| 27     | P25274  | 31   | P83487  | 31   | HGFLPRHRDTG        |
| 28     | P25274  | 25   | P06906  | 25   | TMDHARHGFLP        |
| 29     | P25274  | 33   | P83487  | 33   | FLPRHRDTGIL        |
| 30     | P25274  | 31   | P06906  | 31   | HGFLPRHRDTG        |
| 31     | P25274  | 33   | P06906  | 33   | FLPRHRDTGIL        |
| 32     | P81558  | 64   | P83487  | 65   | GHHAARTTHYG        |
| 33     | P25274  | 54   | P06906  | 54   | RGAPKRGSGKD        |
| 34     | P25274  | 95   | P06906  | 97   | NIVTPRTPPPS        |
| 35     | P81558  | 113  | P83487  | 114  | GLSLSRFSWGA        |
| 36     | P81558  | 113  | P06906  | 113  | GLSLSRFSWGA        |
| 37     | P02687  | 129  | P06906  | 130  | FGYGGRASDYK        |
| 38     | P25274  | 157  | P83487  | 161  | FKLGGDRSRSG        |
| 39     | P25274  | 157  | P06906  | 160  | FKLGGDRSRSG        |
| 40     | P25274  | 160  | P83487  | 164  | GGRDSRSGSPM        |
| 41     | P25274  | 160  | P06906  | 163  | GGRDSRSGSPM        |
| 42     | P25274  | 167  | P83487  | 171  | GSPMARR----        |

|    |        |     |        |     |              |
|----|--------|-----|--------|-----|--------------|
| 43 | P25274 | 167 | P06906 | 170 | GSPMARR----- |
| 44 | P25274 | 168 | P83487 | 172 | SPMARR-----  |
| 45 | P25274 | 168 | P06906 | 171 | SPMARR-----  |
| 46 | O09032 | 323 | Q15717 | 277 | NVKVIRDFNTN  |

## II. Lys-methylation dataset

(A) Of the 262 samples in their learning positive dataset, the following 3 pairs contain a duplicate sequence

| Pair # | Protein | Site | Protein | Site | Duplicate sequence |
|--------|---------|------|---------|------|--------------------|
| 1      | P81558  | 107  | P02687  | 106  | SQGKGKGLSLS        |
| 2      | P81558  | 107  | P83487  | 108  | SQGKGKGLSLS        |
| 3      | P81558  | 107  | P06906  | 107  | SQGKGKGLSLS        |

(B) Of the 2,569 samples in their learning negative dataset, the following 506 pairs contain a duplicate sequence

| Pair # | Protein | Site | Protein | Site | Duplicate sequence |
|--------|---------|------|---------|------|--------------------|
| 1      | P00042  | 85   | P00043  | 86   | YIPGTKMAFGG        |
| 2      | P00042  | 17   | P00044  | 17   | GATLTKTRCLQ        |
| 3      | P00042  | 28   | P00044  | 28   | CHTVEKGGPHK        |
| 4      | P00042  | 33   | P00044  | 33   | KGGPHKVGPNL        |
| 5      | P00042  | 85   | P00044  | 85   | YIPGTKMAFGG        |
| 6      | P00042  | 92   | P00044  | 92   | AFGGLKKEKDR        |
| 7      | P00042  | 93   | P00044  | 93   | FGGLKKEKDRN        |
| 8      | P00042  | 95   | P00044  | 95   | GLKKEKDRNDL        |
| 9      | P00047  | 19   | P00048  | 16   | GANLTKTRCAQ        |
| 10     | P00042  | 85   | P00048  | 84   | YIPGTKMAFGG        |
| 11     | P00051  | 19   | P00060  | 19   | GEKIFKTKCAQ        |
| 12     | P00051  | 21   | P00060  | 21   | KIFKTKCAQCH        |
| 13     | P00051  | 81   | P00060  | 81   | LLNPKKYIPGT        |
| 14     | P00051  | 87   | P00060  | 87   | YIPGTKMVFPG        |
| 15     | P00051  | 107  | P00060  | 107  | LIAYLKEATA-        |
| 16     | P00060  | 12   | P00061  | 12   | PPGNPKAGEKI        |
| 17     | P00060  | 16   | P00061  | 16   | PKAGEKIFKTK        |
| 18     | P00051  | 19   | P00061  | 19   | GEKIFKTKCAQ        |
| 19     | P00051  | 21   | P00061  | 21   | KIFKTKCAQCH        |
| 20     | P00051  | 30   | P00061  | 30   | CHTVDKGAGHK        |
| 21     | P00060  | 35   | P00061  | 35   | KGAGHKEGPNL        |
| 22     | P00051  | 81   | P00061  | 81   | LLNPKKYIPGT        |
| 23     | P00051  | 87   | P00061  | 87   | YIPGTKMVFPG        |
| 24     | P00060  | 95   | P00061  | 95   | FPGLKPKQERA        |

|    |        |     |        |     |             |
|----|--------|-----|--------|-----|-------------|
| 25 | P00051 | 107 | P00061 | 107 | LIAYLKEATA- |
| 26 | P00060 | 12  | P00062 | 12  | PPGNPKAGEKI |
| 27 | P00060 | 16  | P00062 | 16  | PKAGEKIFKTK |
| 28 | P00051 | 30  | P00062 | 30  | CHTVDKGAGHK |
| 29 | P00051 | 35  | P00062 | 35  | KGAGHKQGPNL |
| 30 | P00060 | 61  | P00062 | 61  | YSAANKNMAVN |
| 31 | P00051 | 81  | P00062 | 81  | LLNPKKYIPGT |
| 32 | P00051 | 87  | P00062 | 87  | YIPGTKMVFPG |
| 33 | P00051 | 95  | P00062 | 95  | FPGLKKPQDRA |
| 34 | P00051 | 19  | P00063 | 19  | GEKIFKTKCAQ |
| 35 | P00051 | 21  | P00063 | 21  | KIFKTKCAQCH |
| 36 | P00051 | 30  | P00063 | 30  | CHTVDKGAGHK |
| 37 | P00051 | 35  | P00063 | 35  | KGAGHKQGPNL |
| 38 | P00060 | 61  | P00063 | 61  | YSAANKNMAVN |
| 39 | P00051 | 81  | P00063 | 81  | LLNPKKYIPGT |
| 40 | P00051 | 87  | P00063 | 87  | YIPGTKMVFPG |
| 41 | P00051 | 95  | P00063 | 95  | FPGLKKPQDRA |
| 42 | P00051 | 21  | P00068 | 21  | KIFKTKCAQCH |
| 43 | P00051 | 81  | P00068 | 81  | LLNPKKYIPGT |
| 44 | P00051 | 87  | P00068 | 87  | YIPGTKMVFPG |
| 45 | P00051 | 95  | P00068 | 95  | FPGLKKPQDRA |
| 46 | P00051 | 19  | P00070 | 20  | GEKIFKTKCAQ |
| 47 | P00051 | 21  | P00070 | 22  | KIFKTKCAQCH |
| 48 | P00060 | 30  | P00070 | 31  | CHTVEKGAGHK |
| 49 | P00051 | 35  | P00070 | 36  | KGAGHKQGPNL |
| 50 | P00051 | 81  | P00070 | 82  | LLNPKKYIPGT |
| 51 | P00051 | 87  | P00070 | 88  | YIPGTKMVFPG |
| 52 | P00060 | 95  | P00070 | 96  | FPGLKKPQERA |
| 53 | P00068 | 19  | P00073 | 19  | GAKIFKTKCAQ |
| 54 | P00051 | 21  | P00073 | 21  | KIFKTKCAQCH |
| 55 | P00051 | 81  | P00073 | 81  | LLNPKKYIPGT |
| 56 | P00051 | 87  | P00073 | 87  | YIPGTKMVFPG |
| 57 | P00051 | 95  | P00073 | 95  | FPGLKKPQDRA |
| 58 | P22342 | 7   | P00076 | 7   | DAERGKCLFES |
| 59 | P22342 | 8   | P00076 | 8   | AERGKCLFESR |
| 60 | P22342 | 52  | P00076 | 52  | YSNANKNAAIV |
| 61 | P22342 | 71  | P00076 | 71  | FLENPKKYVPG |
| 62 | P22342 | 72  | P00076 | 72  | LENPKKYVPGT |
| 63 | P22342 | 78  | P00076 | 78  | YVPGTKMAFAG |
| 64 | P22342 | 98  | P00076 | 98  | IIAYMKTLD-  |
| 65 | P22342 | 101 | P00076 | 101 | YMKTLKD---- |
| 66 | P00077 | 84  | P00078 | 84  | LENPKKFMPGT |
| 67 | P00077 | 90  | P00078 | 90  | FMPGTKMSFAG |
| 68 | P25079 | 8   | P00876 | 8   | PQTETKASVGF |
| 69 | P25079 | 18  | P00876 | 18  | FKAGVKEYKLT |
| 70 | P25079 | 21  | P00876 | 21  | GVKEYKLTYYT |
| 71 | P25079 | 32  | P00876 | 32  | PEYQTKDTDIL |
| 72 | P25079 | 81  | P00876 | 81  | SLDRYKGRCYR |

|     |        |     |        |     |              |
|-----|--------|-----|--------|-----|--------------|
| 73  | P25079 | 94  | P00876 | 94  | RVVGEKDQYIA  |
| 74  | P25079 | 128 | P00876 | 128 | NVFGFKALRAL  |
| 75  | P25079 | 161 | P00876 | 161 | QVERDKLNKYG  |
| 76  | P25079 | 164 | P00876 | 164 | RDKLNKYGRPL  |
| 77  | P25079 | 175 | P00876 | 175 | LGCTIKPKLGL  |
| 78  | P25079 | 177 | P00876 | 177 | CTIKPKLGLSA  |
| 79  | P25079 | 183 | P00876 | 183 | LGLSAKNYGRA  |
| 80  | P25079 | 201 | P00876 | 201 | GLDFTKDDENV  |
| 81  | P25079 | 236 | P00876 | 236 | ETGEIKGHYLN  |
| 82  | P25079 | 316 | P00876 | 316 | FRVLAKALRMS  |
| 83  | P25079 | 334 | P00876 | 334 | GTVVGKLEGER  |
| 84  | P25079 | 429 | P00876 | 429 | LEACVKARNEG  |
| 85  | P25079 | 463 | P00876 | 463 | ACEVWKEIVFN  |
| 86  | P25079 | 8   | P27063 | 6   | PQTETKASVGF  |
| 87  | P25079 | 8   | P27065 | 8   | PQTETKASVGF  |
| 88  | P25079 | 18  | P27065 | 18  | FKAGVKEYKLT  |
| 89  | P25079 | 21  | P27065 | 21  | GVKEYKLTYYT  |
| 90  | P25079 | 32  | P27065 | 32  | PEYQTKDTDIL  |
| 91  | P25079 | 81  | P27065 | 81  | SLDRYKGRCYR  |
| 92  | P25079 | 94  | P27065 | 94  | RVVGEKDQYIA  |
| 93  | P25079 | 128 | P27065 | 128 | NVFGFKALRAL  |
| 94  | P00876 | 146 | P27065 | 146 | PPAYVKTFOGP  |
| 95  | P25079 | 161 | P27065 | 161 | QVERDKLNKYG  |
| 96  | P25079 | 164 | P27065 | 164 | RDKLNKYGRPL  |
| 97  | P25079 | 175 | P27065 | 175 | LGCTIKPKLGL  |
| 98  | P25079 | 177 | P27065 | 177 | CTIKPKLGLSA  |
| 99  | P25079 | 183 | P27065 | 183 | LGLSAKNYGRA  |
| 100 | P25079 | 201 | P27065 | 201 | GLDFTKDDENV  |
| 101 | P25079 | 236 | P27065 | 236 | ETGEIKGHYLN  |
| 102 | P00876 | 252 | P27065 | 252 | CEEMI KRAVFA |
| 103 | P00876 | 305 | P27065 | 305 | VIDRQKNHGIH  |
| 104 | P25079 | 316 | P27065 | 316 | FRVLAKALRMS  |
| 105 | P25079 | 334 | P27065 | 334 | GTVVGKLEGER  |
| 106 | P25079 | 429 | P27065 | 429 | LEACVKARNEG  |
| 107 | P00876 | 450 | P27065 | 450 | IREACKWSPEL  |
| 108 | P25079 | 463 | P27065 | 463 | ACEVWKEIVFN  |
| 109 | P00876 | 477 | P27065 | 477 | VDVLDK-----  |
| 110 | P25079 | 8   | P27066 | 8   | PQTETKASVGF  |
| 111 | P25079 | 128 | P27066 | 128 | NVFGFKALRAL  |
| 112 | P25079 | 161 | P27066 | 161 | QVERDKLNKYG  |
| 113 | P25079 | 164 | P27066 | 164 | RDKLNKYGRPL  |
| 114 | P25079 | 175 | P27066 | 175 | LGCTIKPKLGL  |
| 115 | P25079 | 177 | P27066 | 177 | CTIKPKLGLSA  |
| 116 | P25079 | 183 | P27066 | 183 | LGLSAKNYGRA  |
| 117 | P25079 | 201 | P27066 | 201 | GLDFTKDDENV  |
| 118 | P25079 | 236 | P27066 | 236 | ETGEIKGHYLN  |
| 119 | P25079 | 252 | P27066 | 252 | CEEMMKRAVFA  |
| 120 | P25079 | 305 | P27066 | 305 | VIDRQKNHGMH  |

|     |        |     |        |     |              |
|-----|--------|-----|--------|-----|--------------|
| 121 | P25079 | 334 | P27066 | 334 | GTVVGKLEGER  |
| 122 | P21251 | 14  | P02598 | 14  | QIAEFKEAFSL  |
| 123 | P21251 | 22  | P02598 | 22  | FSLFDKDGDGT  |
| 124 | P21251 | 31  | P02598 | 31  | GTITTKELGTV  |
| 125 | P02993 | 20  | P02994 | 20  | HVDSGKSTTTG  |
| 126 | P02993 | 41  | P02994 | 41  | KRTIEKFEKEA  |
| 127 | P02993 | 55  | P02994 | 55  | GKGSFKYAWVL  |
| 128 | P02993 | 62  | P02994 | 62  | AWVLDKLKAER  |
| 129 | P02993 | 64  | P02994 | 64  | VLDKCLKAERER |
| 130 | P02993 | 100 | P02994 | 100 | HRDFIKNMITG  |
| 131 | P02993 | 255 | P02994 | 253 | LQDVYKIGGIG  |
| 132 | P43286 | 63  | P43287 | 61  | TVIGYKIQSDT  |
| 133 | P02993 | 313 | P02994 | 311 | VGFNVKNVSVK  |
| 134 | P43286 | 144 | P43287 | 142 | GVGFBKAFQSS  |
| 135 | P43286 | 241 | P43287 | 239 | AVIYNKSKPWD  |
| 136 | P43286 | 243 | P43287 | 241 | IYNKSKPWDDH  |
| 137 | P43286 | 276 | P43287 | 274 | RASGSKSLGSF  |
| 138 | P25886 | 3   | P47914 | 3   | ---MAKSKNHT  |
| 139 | P25886 | 15  | P47914 | 15  | HNQSRKWHRNG  |
| 140 | P25886 | 22  | P47914 | 22  | HRNGIKKPRSQ  |
| 141 | P25886 | 23  | P47914 | 23  | RNGIKKPRSQR  |
| 142 | P25886 | 33  | P47914 | 33  | RYESLKGVDPK  |
| 143 | P25886 | 38  | P47914 | 38  | KGVDPKFLRNM  |
| 144 | P25886 | 47  | P47914 | 47  | NMRFAKKHNKK  |
| 145 | P25886 | 48  | P47914 | 48  | MRFAKKHNKKG  |
| 146 | P25886 | 51  | P47914 | 51  | AKKHKKGLKK   |
| 147 | P25886 | 52  | P47914 | 52  | KKHNKKGLKKM  |
| 148 | P25886 | 55  | P47914 | 55  | NKKGLKMQAN   |
| 149 | P25886 | 56  | P47914 | 56  | KKGLKMQANN   |
| 150 | P25886 | 73  | P47914 | 73  | RAEAIKALVKP  |
| 151 | P21251 | 14  | P04464 | 14  | QIAEFKEAFSL  |
| 152 | P21251 | 78  | P04464 | 78  | MARKMKDSDSE  |
| 153 | P00219 | 73  | P55907 | 74  | HPASEKKADPV  |
| 154 | P00219 | 74  | P55907 | 75  | PASEKKADPVN  |
| 155 | P00219 | 101 | P55907 | 102 | AAIDVKPP---  |
| 156 | O60814 | 6   | P57053 | 6   | MPEPAKSAPAP  |
| 157 | O60814 | 12  | P57053 | 12  | SAPAPKKGSKK  |
| 158 | O60814 | 13  | P57053 | 13  | APAPKKGSKKA  |
| 159 | O60814 | 16  | P57053 | 16  | PKKGSKKAVTK  |
| 160 | O60814 | 17  | P57053 | 17  | KKGSKKAVTKA  |
| 161 | O60814 | 21  | P57053 | 21  | KKAVTKAQKGD  |
| 162 | O60814 | 35  | P57053 | 35  | RKRSRKESYSV  |
| 163 | O60814 | 44  | P57053 | 44  | SVYVKVLKQV   |
| 164 | O60814 | 117 | P57053 | 117 | VSEGTKAVTKY  |
| 165 | O60814 | 121 | P57053 | 121 | TKAVTKYTSAK  |
| 166 | O60814 | 126 | P57053 | 126 | KYTSAK-----  |
| 167 | P25079 | 8   | P04992 | 8   | PQTETKASVGF  |
| 168 | P25079 | 18  | P04992 | 18  | FKAGVKEYKLT  |



|     |        |     |        |     |              |
|-----|--------|-----|--------|-----|--------------|
| 169 | P25079 | 21  | P04992 | 21  | GVKEYKLTYYT  |
| 170 | O15819 | 57  | P59226 | 54  | LREIRKYQKST  |
| 171 | P25079 | 128 | P04992 | 128 | NVFGFKALRAL  |
| 172 | P00876 | 146 | P04992 | 146 | PPAYVKTFQGP  |
| 173 | P25079 | 161 | P04992 | 161 | QVERDKLNKYG  |
| 174 | P25079 | 164 | P04992 | 164 | RDKLNKYGRPL  |
| 175 | O15819 | 119 | P59226 | 116 | CAIHAKRVTIM  |
| 176 | P25079 | 175 | P04992 | 175 | LGCTIKPKLGL  |
| 177 | P25079 | 177 | P04992 | 177 | CTIKPKLGLSA  |
| 178 | P25079 | 183 | P04992 | 183 | LGLSAKNYGRA  |
| 179 | P25079 | 201 | P04992 | 201 | GLDFTKDDENV  |
| 180 | P25079 | 252 | P04992 | 252 | CEEMMKRAVFA  |
| 181 | P00876 | 305 | P04992 | 305 | VIDRQKNHGIH  |
| 182 | P25079 | 316 | P04992 | 316 | FRVLAKALRMS  |
| 183 | P25079 | 334 | P04992 | 334 | GTVVGKLEGER  |
| 184 | P00876 | 450 | P04992 | 450 | IREACKWSPEL  |
| 185 | P59226 | 65  | P61830 | 65  | ELLIRKLPFOR  |
| 186 | P00876 | 477 | P04992 | 477 | VDVLDK-----  |
| 187 | P39476 | 21  | P61991 | 21  | DISKIKKVWRV  |
| 188 | P39476 | 22  | P61991 | 22  | ISKIKKVWRVG  |
| 189 | P39476 | 28  | P61991 | 28  | VWRVGKMISFT  |
| 190 | P39476 | 40  | P61991 | 40  | DEGGGKTGRGA  |
| 191 | P39476 | 49  | P61991 | 49  | GAVSEKDAPKE  |
| 192 | P39476 | 53  | P61991 | 53  | EKDAPKELLQM  |
| 193 | P21251 | 14  | P62157 | 14  | QIAEFKEAFSL  |
| 194 | P21251 | 22  | P62157 | 22  | FSLFDKDG DGT |
| 195 | P21251 | 31  | P62157 | 31  | GTITTKELGTV  |
| 196 | P21251 | 76  | P62157 | 76  | TMMARKMKD TD |
| 197 | P21251 | 78  | P62157 | 78  | MARKMKD TDSE |
| 198 | P21251 | 95  | P62157 | 95  | FRVFDKDGNGY  |
| 199 | P21251 | 14  | P62184 | 14  | QIAEFKEAFSL  |
| 200 | P21251 | 22  | P62184 | 22  | FSLFDKDG DGT |
| 201 | P21251 | 31  | P62184 | 31  | GTITTKELGTV  |
| 202 | P21251 | 76  | P62184 | 76  | TMMARKMKD TD |
| 203 | P21251 | 78  | P62184 | 78  | MARKMKD TDSE |
| 204 | P62784 | 6   | P62787 | 6   | MSGRGKGGKGL  |
| 205 | P62784 | 9   | P62787 | 9   | RGKGGKGLGKG  |
| 206 | P62784 | 13  | P62787 | 13  | GKGLGKGGAKR  |
| 207 | P62784 | 17  | P62787 | 17  | GKGGAKRHRKV  |
| 208 | P62784 | 32  | P62787 | 32  | IQGITKPAIRR  |
| 209 | P62784 | 45  | P62787 | 45  | RRGGVKRISGL  |
| 210 | P62784 | 92  | P62787 | 92  | VVYALKRQGR T |
| 211 | P62784 | 6   | P62803 | 6   | MSGRGKGGKGL  |
| 212 | P62784 | 9   | P62803 | 9   | RGKGGKGLGKG  |
| 213 | P62784 | 13  | P62803 | 13  | GKGLGKGGAKR  |
| 214 | P62784 | 17  | P62803 | 17  | GKGGAKRHRKV  |
| 215 | P62784 | 32  | P62803 | 32  | IQGITKPAIRR  |
| 216 | P62784 | 45  | P62803 | 45  | RRGGVKRISGL  |



|     |        |     |        |     |               |
|-----|--------|-----|--------|-----|---------------|
| 217 | O60814 | 6   | P06899 | 6   | MPEPAKSAPAP   |
| 218 | P62784 | 60  | P62803 | 60  | TRGVLKVFLN    |
| 219 | O60814 | 12  | P06899 | 12  | SAPAPKKGSKK   |
| 220 | O60814 | 13  | P06899 | 13  | APAPKKGSKKA   |
| 221 | P62784 | 80  | P62803 | 80  | EHAKRKTVTAM   |
| 222 | O60814 | 16  | P06899 | 16  | PKKGSKKA VTK  |
| 223 | P62784 | 92  | P62803 | 92  | VVYALKRQGR    |
| 224 | O60814 | 17  | P06899 | 17  | KKGSKKA VTKA  |
| 225 | O60814 | 21  | P06899 | 21  | KA VTKA QKKD  |
| 226 | O60814 | 24  | P06899 | 24  | VTKA QKKD GKK |
| 227 | O60814 | 25  | P06899 | 25  | TKA QKKD GKKR |
| 228 | O60814 | 28  | P06899 | 28  | QKKD GKKR KRS |
| 229 | O60814 | 29  | P06899 | 29  | KKD GKKR KRSR |
| 230 | O60814 | 31  | P06899 | 31  | DGKKR KRSR KE |
| 231 | O60814 | 86  | P06899 | 86  | LAHYNKRSTIT   |
| 232 | O60814 | 117 | P06899 | 117 | VSEGTKA VTKY  |
| 233 | O60814 | 121 | P06899 | 121 | TKA VTKY TSAK |
| 234 | O60814 | 126 | P06899 | 126 | KY TSAK-----  |
| 235 | P59226 | 15  | P07041 | 15  | KSTGGKAPRKQ   |
| 236 | P02993 | 20  | P68104 | 20  | HVDSGKSTTTG   |
| 237 | P02993 | 30  | P68104 | 30  | GHLIYKCGGID   |
| 238 | P02993 | 41  | P68104 | 41  | KRTIEKFEKEA   |
| 239 | P61830 | 38  | P07041 | 38  | TGGVKKPHRYK   |
| 240 | P61830 | 43  | P07041 | 43  | KPHRYKPGTVA   |
| 241 | P02993 | 55  | P68104 | 55  | GKGSFKYAWVL   |
| 242 | P59226 | 65  | P07041 | 65  | ELLIRKLPFOR   |
| 243 | P02993 | 62  | P68104 | 62  | AWVLDKLKAER   |
| 244 | P02993 | 64  | P68104 | 64  | VLDKLKAERER   |
| 245 | P02993 | 100 | P68104 | 100 | HRDFIKNMITG   |
| 246 | P02993 | 129 | P68104 | 129 | EAGISKNGQTR   |
| 247 | P02993 | 146 | P68104 | 146 | YTLGVKQLIVG   |
| 248 | P02993 | 154 | P68104 | 154 | IVGVNKMDSTE   |
| 249 | P02993 | 255 | P68104 | 255 | LQDVYKIGGIG   |
| 250 | P59226 | 15  | P08898 | 15  | KSTGGKAPRKQ   |
| 251 | P02994 | 288 | P68104 | 290 | VTTEVKSVEMH   |
| 252 | P02993 | 313 | P68104 | 313 | VGFNVKNVSVK   |
| 253 | P07041 | 57  | P08898 | 57  | IRRYQKSTELL   |
| 254 | O15819 | 119 | P08898 | 116 | CAIHAKRVTIM   |
| 255 | P59226 | 123 | P08898 | 123 | VTIMPKDIQLA   |
| 256 | P59226 | 15  | P08903 | 15  | KSTGGKAPRKQ   |
| 257 | P59226 | 38  | P08903 | 38  | TGGVKKPHRFR   |
| 258 | P07041 | 57  | P08903 | 57  | IRRYQKSTELL   |
| 259 | P59226 | 65  | P08903 | 65  | ELLIRKLPFOR   |
| 260 | P59226 | 80  | P08903 | 80  | IAQDFKTDLRF   |
| 261 | O15819 | 119 | P08903 | 116 | CAIHAKRVTIM   |
| 262 | P59226 | 123 | P08903 | 123 | VTIMPKDIQLA   |
| 263 | P59226 | 38  | P68429 | 38  | TGGVKKPHRFR   |
| 264 | O15819 | 57  | P68429 | 54  | LREIRKYQKST   |

|     |        |     |        |     |              |
|-----|--------|-----|--------|-----|--------------|
| 265 | P59226 | 57  | P68429 | 57  | IRKYQKSTELL  |
| 266 | P59226 | 65  | P68429 | 65  | ELLIRKLPFQR  |
| 267 | P59226 | 80  | P68429 | 80  | IAQDFKTDLRF  |
| 268 | O15819 | 119 | P68429 | 116 | CAIHAKRVTIM  |
| 269 | P59226 | 123 | P68429 | 123 | VTIMPKDIQLA  |
| 270 | P59226 | 15  | P68432 | 15  | KSTGGKAPRKQ  |
| 271 | P07472 | 30  | P0A7K2 | 30  | SAMEEKFGVSA  |
| 272 | P02393 | 66  | P0A7K2 | 60  | FDVILKAAGAN  |
| 273 | P07041 | 57  | P68432 | 57  | IRRYQKSTELL  |
| 274 | P59226 | 65  | P68432 | 65  | ELLIRKLPFQR  |
| 275 | P59226 | 80  | P68432 | 80  | IAQDFKTDLRF  |
| 276 | O15819 | 119 | P68432 | 116 | CAIHAKRVTIM  |
| 277 | P59226 | 123 | P68432 | 123 | VTIMPKDIQLA  |
| 278 | P02393 | 127 | P0A7K2 | 121 | AEVEVK-----  |
| 279 | P19984 | 116 | P68696 | 116 | ANVVEKLADYL  |
| 280 | P16403 | 46  | P10412 | 46  | SELITKAVAAS  |
| 281 | P16403 | 52  | P10412 | 52  | AVAASKERSGV  |
| 282 | P16403 | 63  | P10412 | 63  | SLAALKKALAA  |
| 283 | P16403 | 64  | P10412 | 64  | LAALKKALAAA  |
| 284 | P16403 | 75  | P10412 | 75  | GYDVEKNNSRI  |
| 285 | P16403 | 81  | P10412 | 81  | NNSRIKLGLKS  |
| 286 | P16403 | 85  | P10412 | 85  | IKLGLKSLVSK  |
| 287 | P16403 | 90  | P10412 | 90  | KSLVSKGTLVQ  |
| 288 | P16403 | 97  | P10412 | 97  | TLVQTKGTGAS  |
| 289 | P16403 | 106 | P10412 | 106 | ASGSFKLNKKA  |
| 290 | P16403 | 109 | P10412 | 109 | SFKLNKKAASG  |
| 291 | P16403 | 110 | P10412 | 110 | FKLNKKAASGE  |
| 292 | P62784 | 6   | P82888 | 6   | MSGRGKGGKGL  |
| 293 | P62784 | 9   | P82888 | 9   | RGKGGKGLGKG  |
| 294 | P62784 | 13  | P82888 | 13  | GKGLGKGGAKR  |
| 295 | P62784 | 32  | P82888 | 32  | IQGITKPAIRR  |
| 296 | P62784 | 45  | P82888 | 45  | RRGGVKRISGL  |
| 297 | P62784 | 60  | P82888 | 60  | TRGVLVFLEN   |
| 298 | P62784 | 92  | P82888 | 92  | VVYALKRQGR   |
| 299 | P16403 | 152 | P10412 | 152 | PKKSAKKTTPKK |
| 300 | P16403 | 153 | P10412 | 153 | KKSAKKTTPKKA |
| 301 | P16403 | 156 | P10412 | 156 | AKKTPKAKKPP  |
| 302 | P16403 | 157 | P10412 | 157 | KKTPKAKKPPA  |
| 303 | P16403 | 159 | P10412 | 159 | TPKKAKKPAAA  |
| 304 | P68432 | 38  | P84229 | 38  | TGGVKKPHRYR  |
| 305 | P07041 | 57  | P84229 | 57  | IRRYQKSTELL  |
| 306 | P59226 | 65  | P84229 | 65  | ELLIRKLPFQR  |
| 307 | O15819 | 119 | P84229 | 116 | CAIHAKRVTIM  |
| 308 | P59226 | 123 | P84229 | 123 | VTIMPKDIQLA  |
| 309 | P16403 | 196 | P10412 | 197 | KAVKPKAAKPK  |
| 310 | P07041 | 57  | P84249 | 57  | IRRYQKSTELL  |
| 311 | P59226 | 65  | P84249 | 65  | ELLIRKLPFQR  |
| 312 | O15819 | 119 | P84249 | 116 | CAIHAKRVTIM  |

|     |        |     |        |     |              |
|-----|--------|-----|--------|-----|--------------|
| 313 | P59226 | 123 | P84249 | 123 | VTIMPKDIOQLA |
| 314 | P00060 | 12  | Q0DI31 | 13  | PPGNPKAGEKI  |
| 315 | P00060 | 16  | Q0DI31 | 17  | PKAGEKIFKTK  |
| 316 | P00051 | 19  | Q0DI31 | 20  | GEKIFKTKCAQ  |
| 317 | P00051 | 21  | Q0DI31 | 22  | KIFKTKCAQCH  |
| 318 | P00051 | 30  | Q0DI31 | 31  | CHTVDKGAGHK  |
| 319 | P00051 | 35  | Q0DI31 | 36  | KGAGHKQGPNL  |
| 320 | P00051 | 81  | Q0DI31 | 82  | LLNPKKYIPGT  |
| 321 | P00051 | 87  | Q0DI31 | 88  | YIPGTKMVFPG  |
| 322 | P00060 | 95  | Q0DI31 | 96  | FPGLKKPQERA  |
| 323 | P59226 | 15  | Q16695 | 15  | KSTGGKAPRKQ  |
| 324 | P68432 | 37  | Q16695 | 37  | ATGGVKKPHRY  |
| 325 | P68432 | 38  | Q16695 | 38  | TGGVKKPHRYR  |
| 326 | P07041 | 57  | Q16695 | 57  | IRRYQKSTELL  |
| 327 | P59226 | 65  | Q16695 | 65  | ELLIRKLPFOR  |
| 328 | P59226 | 80  | Q16695 | 80  | IAQDFKTDLRF  |
| 329 | P59226 | 123 | Q16695 | 123 | VTIMPKDIOQLA |
| 330 | O60814 | 6   | Q16778 | 6   | MPEPAKSAPAP  |
| 331 | O60814 | 12  | Q16778 | 12  | SAPAPKKGSKK  |
| 332 | O60814 | 13  | Q16778 | 13  | APAPKKGSKKA  |
| 333 | O60814 | 16  | Q16778 | 16  | PKKGSKKAIVTK |
| 334 | O60814 | 17  | Q16778 | 17  | KKGSKKAVTKA  |
| 335 | O60814 | 21  | Q16778 | 21  | KKAVTKAQKGD  |
| 336 | O60814 | 24  | Q16778 | 24  | VTKAQKKGDKK  |
| 337 | O60814 | 25  | Q16778 | 25  | TKAQKKGDKKR  |
| 338 | O60814 | 28  | Q16778 | 28  | QKKGKRRKRS   |
| 339 | O60814 | 29  | Q16778 | 29  | KKDGKRRKRSR  |
| 340 | O60814 | 31  | Q16778 | 31  | DGKKRKRSRKE  |
| 341 | P06899 | 35  | Q16778 | 35  | RKRSRKESYSI  |
| 342 | P06899 | 44  | Q16778 | 44  | SIYVYKVLKQV  |
| 343 | O60814 | 86  | Q16778 | 86  | LAHYNKRSTIT  |
| 344 | O60814 | 117 | Q16778 | 117 | VSEGTKAVTKY  |
| 345 | P59226 | 15  | Q42681 | 15  | KSTGGKAPRKQ  |
| 346 | O15819 | 57  | Q42681 | 53  | LREIRKYQKST  |
| 347 | P59226 | 80  | Q42681 | 79  | IAQDFKTDLRF  |
| 348 | O15819 | 119 | Q42681 | 115 | CAIHAKRVTIM  |
| 349 | P59226 | 123 | Q42681 | 122 | VTIMPKDIOQLA |
| 350 | P68104 | 3   | Q5VTE0 | 3   | ---MGKEKTHI  |
| 351 | P68104 | 5   | Q5VTE0 | 5   | -MGKEKTHINI  |
| 352 | P02993 | 20  | Q5VTE0 | 20  | HVDSGKSTTTG  |
| 353 | P02993 | 30  | Q5VTE0 | 30  | GHLIYKCGGID  |
| 354 | P02993 | 41  | Q5VTE0 | 41  | KRTIEKFEKEA  |
| 355 | P68104 | 44  | Q5VTE0 | 44  | IEKFEKEAAEM  |
| 356 | P68104 | 51  | Q5VTE0 | 51  | AAEMGKGSFKY  |
| 357 | P02993 | 62  | Q5VTE0 | 62  | AWVLDKLKAER  |
| 358 | P02993 | 64  | Q5VTE0 | 64  | VLDKCLKAERER |
| 359 | P68104 | 79  | Q5VTE0 | 79  | DISLWKFETSK  |
| 360 | P68104 | 84  | Q5VTE0 | 84  | KFETSKYYVTI  |

|     |        |     |        |     |              |
|-----|--------|-----|--------|-----|--------------|
| 361 | P02993 | 100 | Q5VTE0 | 100 | HRDFIKNMITG  |
| 362 | P02993 | 129 | Q5VTE0 | 129 | EAGISKNGQTR  |
| 363 | P02993 | 146 | Q5VTE0 | 146 | YTLGVKQLIVG  |
| 364 | P02993 | 154 | Q5VTE0 | 154 | IVGVNKMDSTE  |
| 365 | P68104 | 172 | Q5VTE0 | 172 | YEEIVKEVSTY  |
| 366 | P68104 | 179 | Q5VTE0 | 179 | VSTYIKKIGYN  |
| 367 | P68104 | 180 | Q5VTE0 | 180 | STYIKKIGYNP  |
| 368 | P68104 | 212 | Q5VTE0 | 212 | NMPWFKGWKVT  |
| 369 | P68104 | 215 | Q5VTE0 | 215 | WFKGWKVTRKD  |
| 370 | P68104 | 219 | Q5VTE0 | 219 | WKVTRKDGNAS  |
| 371 | P68104 | 244 | Q5VTE0 | 244 | TRPTDKPLRLP  |
| 372 | P02993 | 255 | Q5VTE0 | 255 | LQDVYKIGGIG  |
| 373 | P68104 | 273 | Q5VTE0 | 273 | ETGVLKPGMVV  |
| 374 | P02994 | 288 | Q5VTE0 | 290 | VTTEVKSVMEMH |
| 375 | P68104 | 318 | Q5VTE0 | 318 | KNVSVKDVRRG  |
| 376 | P68104 | 330 | Q5VTE0 | 330 | VAGDSKNDPPM  |
| 377 | P68104 | 371 | Q5VTE0 | 371 | AHIACKFAELK  |
| 378 | P68104 | 376 | Q5VTE0 | 376 | KFAELKEKIDR  |
| 379 | P68104 | 378 | Q5VTE0 | 378 | AELKEKIDRRS  |
| 380 | P68104 | 385 | Q5VTE0 | 385 | DRRSGKKLEDG  |
| 381 | P68104 | 386 | Q5VTE0 | 386 | RRSGKKLEDGP  |
| 382 | P68104 | 392 | Q5VTE0 | 392 | LEDGPKFLKSG  |
| 383 | P68104 | 395 | Q5VTE0 | 395 | GPKFLKSGDAA  |
| 384 | P68104 | 408 | Q5VTE0 | 408 | DMVPGKPMCVE  |
| 385 | P68104 | 439 | Q5VTE0 | 439 | AVGVIKAVDKK  |
| 386 | P68104 | 443 | Q5VTE0 | 443 | IKAVDKKAAGA  |
| 387 | P68104 | 444 | Q5VTE0 | 444 | KAVDKKAAGAG  |
| 388 | P68104 | 450 | Q5VTE0 | 450 | AAGAGKVTKSA  |
| 389 | P68104 | 453 | Q5VTE0 | 453 | AGKVTKSAQKA  |
| 390 | P68104 | 457 | Q5VTE0 | 457 | TKSAQKAQKAK  |
| 391 | P68104 | 460 | Q5VTE0 | 460 | AQKAQKAK---  |
| 392 | P68104 | 462 | Q5VTE0 | 462 | KAQKAK-----  |
| 393 | P68104 | 3   | Q71V39 | 3   | ---MGKEKTHI  |
| 394 | P68104 | 5   | Q71V39 | 5   | -MGKEKTHINI  |
| 395 | P02993 | 20  | Q71V39 | 20  | HVDSGKSTTTG  |
| 396 | P59226 | 15  | P10651 | 15  | KSTGGKAPRKQ  |
| 397 | P02993 | 30  | Q71V39 | 30  | GHLIYKCGGID  |
| 398 | P02993 | 41  | Q71V39 | 41  | KRTIEKFEKEA  |
| 399 | P68104 | 44  | Q71V39 | 44  | IEKFEKEAAEM  |
| 400 | P68104 | 51  | Q71V39 | 51  | AAEMGKGSFKY  |
| 401 | P68432 | 38  | P10651 | 38  | TGGVKKPHRYR  |
| 402 | P07041 | 57  | P10651 | 57  | IRRYQKSTELL  |
| 403 | P02993 | 62  | Q71V39 | 62  | AWVLDKLKAER  |
| 404 | P59226 | 65  | P10651 | 65  | ELLIRKLPFQR  |
| 405 | P02993 | 64  | Q71V39 | 64  | VLDKLAERER   |
| 406 | P59226 | 80  | P10651 | 80  | IAQDFKTDLRF  |
| 407 | P02993 | 100 | Q71V39 | 100 | HRDFIKNMITG  |
| 408 | P21251 | 14  | P11118 | 14  | QIAEFKEAFSL  |

|     |        |     |        |     |             |
|-----|--------|-----|--------|-----|-------------|
| 409 | P02993 | 129 | Q71V39 | 129 | EAGISKNGQTR |
| 410 | P21251 | 22  | P11118 | 22  | FSLFDKDGDGT |
| 411 | P02993 | 146 | Q71V39 | 146 | YTLGVKQLIVG |
| 412 | P21251 | 31  | P11118 | 31  | GTITTKELGTV |
| 413 | P02993 | 154 | Q71V39 | 154 | IVGVNKMDSTE |
| 414 | P02993 | 179 | Q71V39 | 179 | VSAYIKKIGYN |
| 415 | P02993 | 180 | Q71V39 | 180 | SAYIKKIGYNP |
| 416 | P68104 | 244 | Q71V39 | 244 | TRPTDKPLRLP |
| 417 | P02993 | 255 | Q71V39 | 255 | LQDVYKIGGIG |
| 418 | P02993 | 290 | Q71V39 | 290 | ITTEVKSVMH  |
| 419 | P02993 | 313 | Q71V39 | 313 | VGFNVKNVSVK |
| 420 | P68104 | 371 | Q71V39 | 371 | AHIACKFAELK |
| 421 | P68104 | 376 | Q71V39 | 376 | KFAELKEKIDR |
| 422 | P68104 | 378 | Q71V39 | 378 | AELKEKIDRRS |
| 423 | P68104 | 453 | Q71V39 | 453 | AGKVTKSAQKA |
| 424 | Q13310 | 30  | P11940 | 30  | AMLYEKFSFAG |
| 425 | Q13310 | 95  | P11940 | 95  | DPSLRKSGVGN |
| 426 | Q13310 | 108 | P11940 | 108 | IKNLDKSIDNK |
| 427 | P19984 | 91  | Q95VF7 | 91  | GVITVKTSKAI |
| 428 | Q13310 | 113 | P11940 | 113 | KSIDNKALYDT |
| 429 | Q13310 | 129 | P11940 | 129 | NILSCKVVCDE |
| 430 | P19984 | 116 | Q95VF7 | 116 | ANVVEKLADYL |
| 431 | Q13310 | 167 | P11940 | 167 | LLNDRKVFVGR |
| 432 | Q13310 | 174 | P11940 | 174 | FVGRFKSRKER |
| 433 | Q13310 | 177 | P11940 | 177 | RFKSRKEREAE |
| 434 | Q13310 | 268 | P11940 | 268 | VGRAQKKVERQ |
| 435 | O60814 | 12  | Q99877 | 12  | SAPAPKKGSKK |
| 436 | Q13310 | 348 | P11940 | 348 | PEEATKAVTEM |
| 437 | O60814 | 13  | Q99877 | 13  | APAPKKGSKKA |
| 438 | O60814 | 16  | Q99877 | 16  | PKKGSKKAVTK |
| 439 | O60814 | 17  | Q99877 | 17  | KKGSKKAVTKA |
| 440 | O60814 | 21  | Q99877 | 21  | KKAVTKAQKGD |
| 441 | Q13310 | 568 | P11940 | 559 | PPQEQKQMLGE |
| 442 | O60814 | 24  | Q99877 | 24  | VTKAQKKGDKK |
| 443 | O60814 | 25  | Q99877 | 25  | TKAQKKGDKKR |
| 444 | Q13310 | 615 | P11940 | 606 | ESLRSKVDEAV |
| 445 | O60814 | 28  | Q99877 | 28  | QKKDGKRRKRS |
| 446 | O60814 | 29  | Q99877 | 29  | KKDGKRRKRSR |
| 447 | O60814 | 31  | Q99877 | 31  | DGKKRKRSRKE |
| 448 | O60814 | 35  | Q99877 | 35  | RKRSRKESYSV |
| 449 | O60814 | 44  | Q99877 | 44  | SVYVYKVLKQV |
| 450 | P39476 | 9   | P13123 | 9   | VKFKYKGEEKE |
| 451 | O60814 | 86  | Q99877 | 86  | LAHYNKRSTIT |
| 452 | O60814 | 117 | Q99877 | 117 | VSEGTKAVTKY |
| 453 | Q16778 | 121 | Q99877 | 121 | TKAVTKYTSSK |
| 454 | Q16778 | 126 | Q99877 | 126 | KYTSSK----- |
| 455 | P39476 | 49  | P13123 | 48  | GAVSEKDAPKE |
| 456 | O60814 | 12  | Q99880 | 12  | SAPAPKKGSKK |

|     |        |     |        |     |                                                          |
|-----|--------|-----|--------|-----|----------------------------------------------------------|
| 457 | O60814 | 13  | Q99880 | 13  | APAPK <b>K</b> GSKKA                                     |
| 458 | O60814 | 16  | Q99880 | 16  | PKKGS <b>K</b> KAVTK                                     |
| 459 | O60814 | 17  | Q99880 | 17  | KKGS <b>K</b> AVTKA                                      |
| 460 | O60814 | 21  | Q99880 | 21  | KA <b>V</b> T <b>K</b> AQKKD                             |
| 461 | O60814 | 24  | Q99880 | 24  | VT <b>K</b> AQ <b>K</b> KGKK                             |
| 462 | O60814 | 25  | Q99880 | 25  | TKAQ <b>K</b> KGKKR                                      |
| 463 | O60814 | 28  | Q99880 | 28  | Q <b>K</b> KG <b>K</b> KKRKS                             |
| 464 | O60814 | 29  | Q99880 | 29  | KKDG <b>K</b> KKR <b>S</b> R                             |
| 465 | O60814 | 31  | Q99880 | 31  | DG <b>K</b> KK <b>R</b> SRKE                             |
| 466 | O60814 | 35  | Q99880 | 35  | RKR <b>S</b> R <b>K</b> ESYSV                            |
| 467 | O60814 | 44  | Q99880 | 44  | SVYV <b>Y</b> KVLKQV                                     |
| 468 | O60814 | 86  | Q99880 | 86  | LAH <b>Y</b> N <b>K</b> RSTIT                            |
| 469 | O60814 | 117 | Q99880 | 117 | VSEGT <b>K</b> AVTKY                                     |
| 470 | Q16778 | 121 | Q99880 | 121 | TKAV <b>T</b> K <b>Y</b> TSSK                            |
| 471 | Q16778 | 126 | Q99880 | 126 | K <b>Y</b> TSS <b>K</b> -----                            |
| 472 | P40283 | 36  | Q9FFC0 | 31  | AE <b>K</b> KK <b>K</b> AGK <b>K</b> L                   |
| 473 | P40283 | 39  | Q9FFC0 | 34  | K <b>P</b> KAG <b>K</b> KL <b>P</b> KE                   |
| 474 | P40283 | 69  | Q9FFC0 | 64  | K <b>I</b> Y <b>I</b> F <b>K</b> VLKQV                   |
| 475 | P40283 | 72  | Q9FFC0 | 67  | I <b>F</b> K <b>V</b> L <b>K</b> Q <b>V</b> H <b>P</b> D |
| 476 | P40283 | 83  | Q9FFC0 | 78  | I <b>G</b> ISS <b>K</b> AM <b>G</b> IM                   |
| 477 | P40283 | 111 | Q9FFC0 | 106 | L <b>A</b> R <b>Y</b> N <b>K</b> K <b>P</b> TIT          |
| 478 | P40283 | 112 | Q9FFC0 | 107 | A <b>R</b> Y <b>N</b> K <b>P</b> T <b>I</b> T <b>S</b>   |
| 479 | P40283 | 142 | Q9FFC0 | 137 | VSEGT <b>K</b> AV <b>T</b> K <b>F</b>                    |
| 480 | P40283 | 146 | Q9FFC0 | 141 | TKAV <b>T</b> K <b>F</b> TSS-                            |
| 481 | P40283 | 7   | Q9LZT0 | 7   | AP <b>K</b> AE <b>K</b> K <b>P</b> AE <b>K</b>           |
| 482 | P40283 | 8   | Q9LZT0 | 8   | P <b>K</b> AE <b>K</b> K <b>P</b> AE <b>K</b> K          |
| 483 | P40283 | 23  | Q9LZT0 | 18  | K <b>P</b> VEE <b>K</b> S <b>K</b> AE <b>K</b>           |
| 484 | P40283 | 25  | Q9LZT0 | 20  | VEE <b>K</b> S <b>K</b> AE <b>K</b> AP                   |
| 485 | P40283 | 28  | Q9LZT0 | 23  | K <b>S</b> KA <b>E</b> K <b>A</b> PA <b>E</b> K          |
| 486 | P40283 | 33  | Q9LZT0 | 28  | K <b>A</b> PA <b>E</b> K <b>K</b> P <b>K</b> AG          |
| 487 | P40283 | 34  | Q9LZT0 | 29  | A <b>P</b> AE <b>K</b> K <b>P</b> KAG <b>K</b>           |
| 488 | P40283 | 36  | Q9LZT0 | 31  | AE <b>K</b> KK <b>K</b> AG <b>K</b> KL                   |
| 489 | P40283 | 39  | Q9LZT0 | 34  | K <b>P</b> KAG <b>K</b> KL <b>P</b> KE                   |
| 490 | P40283 | 40  | Q9LZT0 | 35  | P <b>K</b> AG <b>K</b> KL <b>P</b> KE <b>A</b>           |
| 491 | P40283 | 43  | Q9LZT0 | 38  | G <b>K</b> KL <b>P</b> KEAG <b>A</b> G                   |
| 492 | P40283 | 51  | Q9LZT0 | 46  | GAGGD <b>K</b> KK <b>K</b> MM <b>K</b>                   |
| 493 | P40283 | 52  | Q9LZT0 | 47  | AGGD <b>K</b> KK <b>K</b> MM <b>K</b> K                  |
| 494 | P40283 | 53  | Q9LZT0 | 48  | GGD <b>K</b> KK <b>K</b> MM <b>K</b> KK                  |
| 495 | P40283 | 54  | Q9LZT0 | 49  | GD <b>K</b> KK <b>K</b> MM <b>K</b> KK <b>S</b>          |
| 496 | P40283 | 56  | Q9LZT0 | 51  | KK <b>K</b> MM <b>K</b> KK <b>S</b> VE                   |
| 497 | P40283 | 57  | Q9LZT0 | 52  | KK <b>K</b> MM <b>K</b> KK <b>S</b> VET                  |
| 498 | P40283 | 58  | Q9LZT0 | 53  | KK <b>K</b> MM <b>K</b> KK <b>S</b> VETY                 |
| 499 | P40283 | 64  | Q9LZT0 | 59  | SVETY <b>K</b> I <b>Y</b> I <b>F</b> K                   |
| 500 | P40283 | 69  | Q9LZT0 | 64  | K <b>I</b> Y <b>I</b> F <b>K</b> VLKQV                   |
| 501 | P40283 | 72  | Q9LZT0 | 67  | I <b>F</b> K <b>V</b> L <b>K</b> Q <b>V</b> H <b>P</b> D |
| 502 | P40283 | 83  | Q9LZT0 | 78  | I <b>G</b> ISS <b>K</b> AM <b>G</b> IM                   |
| 503 | P40283 | 111 | Q9LZT0 | 106 | L <b>A</b> R <b>Y</b> N <b>K</b> K <b>P</b> TIT          |
| 504 | P40283 | 112 | Q9LZT0 | 107 | A <b>R</b> Y <b>N</b> K <b>P</b> T <b>I</b> T <b>S</b>   |

|     |        |     |        |     |                      |
|-----|--------|-----|--------|-----|----------------------|
| 505 | P40283 | 142 | Q9LZT0 | 137 | VSEGT <b>K</b> AVTKF |
| 506 | P40283 | 146 | Q9LZT0 | 141 | TKAVT <b>K</b> FTSS- |

(C) Of the 48 samples in their testing positive dataset, the following 24 pairs contain a duplicate sequence

| Pair # | Protein | Site | Protein | Site | Duplicate sequence   |
|--------|---------|------|---------|------|----------------------|
| 1      | P00052  | 80   | P62772  | 80   | YLLNP <b>K</b> KYIPG |
| 2      | P59169  | 10   | P09988  | 10   | KQTAR <b>K</b> STGGK |
| 3      | P00052  | 94   | P62772  | 94   | VFPGL <b>K</b> KPQDR |
| 4      | P58876  | 47   | P62807  | 47   | VYKVL <b>K</b> QVHPD |
| 5      | P58876  | 58   | P62807  | 58   | TGISS <b>K</b> AMGIM |
| 6      | P62154  | 116  | P11121  | 116  | TNLGE <b>K</b> LTDEE |
| 7      | P58876  | 109  | P62807  | 109  | PGELA <b>K</b> HAVSE |
| 8      | P59169  | 5    | Q6LCW8  | 5    | -MART <b>K</b> QTARK |
| 9      | P59169  | 10   | Q6LCW8  | 10   | KQTAR <b>K</b> STGGK |
| 10     | P09988  | 37   | Q6LCW8  | 36   | ATGGV <b>K</b> KPHRY |
| 11     | P58876  | 47   | P23527  | 47   | VYKVL <b>K</b> QVHPD |
| 12     | P58876  | 58   | P23527  | 58   | TGISS <b>K</b> AMGIM |
| 13     | P58876  | 109  | P23527  | 109  | PGELA <b>K</b> HAVSE |
| 14     | P58876  | 47   | Q8N257  | 47   | VYKVL <b>K</b> QVHPD |
| 15     | P58876  | 58   | Q8N257  | 58   | TGISS <b>K</b> AMGIM |
| 16     | P58876  | 109  | Q8N257  | 109  | PGELA <b>K</b> HAVSE |
| 17     | P59169  | 5    | P50564  | 5    | -MART <b>K</b> QTARK |
| 18     | P59169  | 10   | P50564  | 10   | KQTAR <b>K</b> STGGK |
| 19     | P58876  | 47   | Q93079  | 47   | VYKVL <b>K</b> QVHPD |
| 20     | P58876  | 58   | Q93079  | 58   | TGISS <b>K</b> AMGIM |
| 21     | Q6LCW8  | 28   | P50564  | 28   | TKAAR <b>K</b> TPATG |
| 22     | P58876  | 109  | Q93079  | 109  | PGELA <b>K</b> HAVSE |
| 23     | P09988  | 37   | P50564  | 36   | ATGGV <b>K</b> KPHRY |
| 24     | P62154  | 116  | Q95NR9  | 116  | TNLGE <b>K</b> LTDEE |

(D) Of the 243 samples in their testing negative dataset, the following 111 pairs contain a duplicate sequence

| Pair # | Protein | Site | Protein | Site | Duplicate sequence   |
|--------|---------|------|---------|------|----------------------|
| 1      | P00052  | 19   | P62772  | 19   | GEKIF <b>K</b> TKCAQ |
| 2      | P00052  | 21   | P62772  | 21   | KIFKT <b>K</b> CAQCH |
| 3      | P00052  | 30   | P62772  | 30   | CHTV <b>D</b> KGAGHK |
| 4      | P62154  | 31   | P07463  | 31   | GTIT <b>T</b> KELGTV |
| 5      | P00052  | 35   | P62772  | 35   | KGAGH <b>K</b> QGPLN |
| 6      | P00052  | 81   | P62772  | 81   | LLNP <b>K</b> KYIPGT |
| 7      | P00052  | 87   | P62772  | 87   | YIPGT <b>K</b> MVFPG |
| 8      | P59169  | 15   | P09988  | 15   | KSTGG <b>K</b> APRKQ |



|    |        |     |        |     |             |
|----|--------|-----|--------|-----|-------------|
| 9  | P00052 | 95  | P62772 | 95  | FPGLKKPQDRA |
| 10 | P59169 | 38  | P09988 | 38  | TGGVKKPHRYR |
| 11 | P59169 | 65  | P09988 | 65  | ELLIRKLPFQR |
| 12 | P58876 | 21  | P62807 | 21  | KKAVTKAQKKD |
| 13 | P59169 | 80  | P09988 | 80  | IAQDFKTDLRF |
| 14 | P58876 | 24  | P62807 | 24  | VTKAQKKGK   |
| 15 | P58876 | 25  | P62807 | 25  | TKAQKKGK    |
| 16 | P58876 | 28  | P62807 | 28  | QKKGKRRKRS  |
| 17 | P62154 | 14  | P11121 | 14  | QIAEFKEAFSL |
| 18 | P58876 | 29  | P62807 | 29  | KKDGKRRKRSR |
| 19 | P62154 | 22  | P11121 | 22  | FSLFDKDGDT  |
| 20 | P58876 | 31  | P62807 | 31  | DGKRRKRSRKE |
| 21 | P62154 | 31  | P11121 | 31  | GTITTKELGTV |
| 22 | P58876 | 35  | P62807 | 35  | RKRSRKESYSV |
| 23 | P62154 | 76  | P11121 | 76  | TMMARKMKD   |
| 24 | P58876 | 44  | P62807 | 44  | SVYVYKVLKQV |
| 25 | P62154 | 78  | P11121 | 78  | MARKMKD     |
| 26 | P62154 | 95  | P11121 | 95  | FRVFDKDGNGF |
| 27 | P58876 | 86  | P62807 | 86  | LAHYNKRSTIT |
| 28 | P62154 | 149 | P11121 | 149 | TMMTSK----- |
| 29 | P58876 | 117 | P62807 | 117 | VSEGTKAVTKY |
| 30 | P58876 | 121 | P62807 | 121 | TKAVTKYTSSK |
| 31 | P58876 | 126 | P62807 | 126 | KYTSSK----- |
| 32 | P62807 | 12  | P23527 | 12  | SAPAPKKGSKK |
| 33 | P59169 | 15  | Q6LCW8 | 15  | KSTGGKAPRKQ |
| 34 | P62807 | 13  | P23527 | 13  | APAPKKGSKKA |
| 35 | P62807 | 16  | P23527 | 16  | PKKGSKAVTK  |
| 36 | P62807 | 17  | P23527 | 17  | KKGSKAVTKA  |
| 37 | P58876 | 21  | P23527 | 21  | KKAVTKAQKKD |
| 38 | P58876 | 24  | P23527 | 24  | VTKAQKKGK   |
| 39 | P58876 | 25  | P23527 | 25  | TKAQKKGK    |
| 40 | P59169 | 54  | Q6LCW8 | 53  | LREIRKYQKST |
| 41 | P58876 | 28  | P23527 | 28  | QKKGKRRKRS  |
| 42 | P59169 | 57  | Q6LCW8 | 56  | IRKYQKSTELL |
| 43 | P58876 | 29  | P23527 | 29  | KKDGKRRKRSR |
| 44 | P59169 | 65  | Q6LCW8 | 64  | ELLIRKLPFQR |
| 45 | P58876 | 31  | P23527 | 31  | DGKRRKRSRKE |
| 46 | P59169 | 80  | Q6LCW8 | 79  | IAQDFKTDLRF |
| 47 | P59169 | 116 | Q6LCW8 | 115 | CAIHAKRVTIM |
| 48 | P59169 | 123 | Q6LCW8 | 122 | VTIMPKDIQLA |
| 49 | P62807 | 12  | Q8N257 | 12  | SAPAPKKGSKK |
| 50 | P58876 | 86  | P23527 | 86  | LAHYNKRSTIT |
| 51 | P62807 | 13  | Q8N257 | 13  | APAPKKGSKKA |
| 52 | P62807 | 16  | Q8N257 | 16  | PKKGSKAVTK  |
| 53 | P58876 | 117 | P23527 | 117 | VSEGTKAVTKY |
| 54 | P62807 | 17  | Q8N257 | 17  | KKGSKAVTKA  |
| 55 | P58876 | 121 | P23527 | 121 | TKAVTKYTSSK |
| 56 | P58876 | 21  | Q8N257 | 21  | KKAVTKAQKKD |

|     |        |     |        |     |              |
|-----|--------|-----|--------|-----|--------------|
| 57  | P58876 | 126 | P23527 | 126 | KYTSSK-----  |
| 58  | P58876 | 24  | Q8N257 | 24  | VTKAQKKDGKK  |
| 59  | P58876 | 25  | Q8N257 | 25  | TKAQKKDGKKR  |
| 60  | P04717 | 18  | P27064 | 18  | FKAGVKDYKLT  |
| 61  | P04717 | 21  | P27064 | 21  | GVKDYKLTYYT  |
| 62  | P23527 | 44  | Q8N257 | 44  | SIYVYKVLKQV  |
| 63  | P04717 | 128 | P27064 | 128 | NVFGFKALRAL  |
| 64  | P04717 | 161 | P27064 | 161 | QVERDKLNKYG  |
| 65  | P58876 | 86  | Q8N257 | 86  | LAHYNKRSTIT  |
| 66  | P04717 | 164 | P27064 | 164 | RDKLNKYGRPL  |
| 67  | P04717 | 175 | P27064 | 175 | LGCTIKPKLGL  |
| 68  | P58876 | 117 | Q8N257 | 117 | VSEGTKAVTKY  |
| 69  | P04717 | 177 | P27064 | 177 | CTIKPKLGLSA  |
| 70  | P58876 | 121 | Q8N257 | 121 | TKAVTKYTSSK  |
| 71  | P04717 | 183 | P27064 | 183 | LGLSAKNYGRA  |
| 72  | P58876 | 126 | Q8N257 | 126 | KYTSSK-----  |
| 73  | P04717 | 201 | P27064 | 201 | GLDFTKDDENV  |
| 74  | P23527 | 6   | Q93079 | 6   | MPDPAKSAPAP  |
| 75  | P62807 | 12  | Q93079 | 12  | SAPAPKKGSKK  |
| 76  | P04717 | 236 | P27064 | 236 | ETGEIKGHYLN  |
| 77  | P62807 | 13  | Q93079 | 13  | APAPKKGSKKA  |
| 78  | P62807 | 16  | Q93079 | 16  | PKKGSKKAVTK  |
| 79  | P04717 | 305 | P27064 | 305 | VIDROKNHGMH  |
| 80  | P62807 | 17  | Q93079 | 17  | KKGSKKAVTKA  |
| 81  | P58876 | 21  | Q93079 | 21  | KKAVTKAQKKD  |
| 82  | P04717 | 334 | P27064 | 334 | GTVVGKLEGER  |
| 83  | P58876 | 24  | Q93079 | 24  | VTKAQKKDGKK  |
| 84  | P58876 | 25  | Q93079 | 25  | TKAQKKDGKKR  |
| 85  | P58876 | 28  | Q93079 | 28  | QKKDGKKRKRS  |
| 86  | P04717 | 463 | P27064 | 463 | ACEVWKEIKFE  |
| 87  | P58876 | 29  | Q93079 | 29  | KKDGGKRRKRSR |
| 88  | P58876 | 31  | Q93079 | 31  | DGKKRKRSRKE  |
| 89  | P58876 | 35  | Q93079 | 35  | RKRSRKESYSV  |
| 90  | P58876 | 44  | Q93079 | 44  | SVYVYKVLKQV  |
| 91  | P59169 | 15  | P50564 | 15  | KSTGGKAPRKQ  |
| 92  | Q6LCW8 | 24  | P50564 | 24  | KQLATKAARKT  |
| 93  | P58876 | 86  | Q93079 | 86  | LAHYNKRSTIT  |
| 94  | P58876 | 117 | Q93079 | 117 | VSEGTKAVTKY  |
| 95  | P58876 | 121 | Q93079 | 121 | TKAVTKYTSSK  |
| 96  | P59169 | 54  | P50564 | 53  | LREIRKYQKST  |
| 97  | P58876 | 126 | Q93079 | 126 | KYTSSK-----  |
| 98  | P59169 | 57  | P50564 | 56  | IRKYQKSTELL  |
| 99  | P62154 | 14  | Q95NR9 | 14  | QIAEFKEAFSL  |
| 100 | P59169 | 65  | P50564 | 64  | ELLIRKLPFQR  |
| 101 | P62154 | 22  | Q95NR9 | 22  | FSLFDKDGDT   |
| 102 | P59169 | 80  | P50564 | 79  | IAQDFKTDLRF  |
| 103 | P62154 | 31  | Q95NR9 | 31  | GTITTKELGTV  |
| 104 | P62154 | 76  | Q95NR9 | 76  | TMMARKMKDTD  |

|     |        |     |        |     |             |
|-----|--------|-----|--------|-----|-------------|
| 105 | P59169 | 123 | P50564 | 122 | VTIMPKDIQLA |
| 106 | P62154 | 78  | Q95NR9 | 78  | MARKMKDTDSE |
| 107 | P62154 | 95  | Q95NR9 | 95  | FRVFDKDGNGF |
| 108 | P62807 | 12  | P58876 | 12  | SAPAPKKGSKK |
| 109 | P62807 | 13  | P58876 | 13  | APAPKKGSKKA |
| 110 | P62807 | 16  | P58876 | 16  | PKKGSKKAVTK |
| 111 | P62807 | 17  | P58876 | 17  | KKGSKKAVTKA |
