# Supplementary material for: iMethyl-PseAAC: Identification of Protein Methylation Sites via a Pseudo Amino Acid Composition Approach
Source: Hindawi journal article supplement (doi:10.1155/2014/947416), 2014-01-01
Supplement: f1 [file 947416.f1.zip]

**Online Supporting Information S7. Independent dataset for studying the Arg-methylation.** It contains 75 samples, of which 20 are positive and 55 negative. None of the samples listed here occurs in Online Supporting Information S3.

| Sample # | Protein ID | Site | Sequences             |
|----------|------------|------|-----------------------|
| 1        | P62805     | 4    | MMMSG <b>R</b> GKGGK  |
| 2        | Q28009     | 211  | QDRGG <b>R</b> GRGGG  |
| 3        | Q28009     | 213  | RGG <b>R</b> RGGGGG   |
| 4        | Q28009     | 229  | GGYEP <b>R</b> GRGGG  |
| 5        | Q28009     | 231  | YEPRG <b>R</b> GGGRG  |
| 6        | Q28009     | 235  | GRGGG <b>R</b> GGRGG  |
| 7        | Q28009     | 238  | GGRGG <b>R</b> GGMGG  |
| 8        | Q28009     | 246  | MGGSD <b>R</b> GGFNK  |
| 9        | Q28009     | 460  | YGDDR <b>R</b> GGRGG  |
| 10       | Q28009     | 463  | DRRG <b>R</b> GGYDR   |
| 11       | Q28009     | 468  | RGGYD <b>R</b> GGYRG  |
| 12       | Q28009     | 472  | DRGGY <b>R</b> GRGGD  |
| 13       | Q28009     | 474  | GGYR <b>R</b> GGDRG   |
| 14       | Q28009     | 478  | GRGGD <b>R</b> GGFRG  |
| 15       | Q28009     | 482  | DRGGF <b>R</b> GGRGG  |
| 16       | Q28009     | 370  | GGNG <b>R</b> GGRGR   |
| 17       | Q28009     | 373  | NGRGG <b>R</b> GRGGP  |
| 18       | Q28009     | 375  | RGG <b>R</b> RGGPMG   |
| 19       | Q28009     | 381  | GGPM <b>R</b> GGYGG   |
| 20       | Q28009     | 394  | SGGG <b>R</b> GGFPS   |
| 21       | Q28009     | 409  | GGGQ <b>R</b> AGDWK   |
| 22       | Q28009     | 428  | MNFSW <b>R</b> NECNQ  |
| 23       | P62805     | 18   | KGGAK <b>R</b> HRKVL  |
| 24       | P62805     | 20   | GAKR <b>R</b> HKVLRD  |
| 25       | P62805     | 24   | HRKV <b>L</b> RDNIQG  |
| 26       | P62805     | 36   | TKPA <b>I</b> RRLARR  |
| 27       | P62805     | 37   | KPA <b>I</b> RRLARRG  |
| 28       | P62805     | 40   | IR <b>L</b> ARRGGVK   |
| 29       | P62805     | 46   | RGGV <b>K</b> RISGLI  |
| 30       | P62805     | 56   | IYEET <b>R</b> GV LKV |
| 31       | P62805     | 68   | LENV <b>I</b> RDV TY  |
| 32       | P62805     | 79   | TEHAK <b>R</b> KTVTA  |
| 33       | P62805     | 93   | VYAL <b>K</b> RQGRTL  |
| 34       | P62805     | 96   | LKRQ <b>R</b> TLYGF   |
| 35       | P10651     | 9    | TKQ <b>T</b> ARKSTGG  |
| 36       | P10651     | 27   | ASKA <b>A</b> RKAAPA  |
| 37       | P10651     | 41   | VKKP <b>H</b> YRPPT   |
| 38       | P10651     | 43   | KPH <b>R</b> YRPPTVA  |
| 39       | P10651     | 50   | PTVAL <b>R</b> EIRRY  |
| 40       | P10651     | 53   | ALRE <b>I</b> RRYQKS  |
| 41       | P10651     | 54   | LRE <b>I</b> RRYQKST  |
| 42       | P10651     | 64   | TELL <b>I</b> RKLPFQ  |
| 43       | P10651     | 70   | KLPF <b>O</b> RLVREI  |
| 44       | P10651     | 73   | FQ <b>R</b> LVREIAQD  |
| 45       | P10651     | 84   | FKTDL <b>R</b> FQSSA  |

|    |        |     |              |
|----|--------|-----|--------------|
| 46 | P10651 | 117 | AIHGKRVTIQP  |
| 47 | P10651 | 129 | DMQLARRLRGE  |
| 48 | P10651 | 130 | MQLARRLRGER  |
| 49 | P10651 | 132 | LARRLRGERS   |
| 50 | P10651 | 135 | RLRGERSSSS   |
| 51 | P68429 | 9   | TKQTARKSTGG  |
| 52 | P68429 | 27  | ATKAARKSAPA  |
| 53 | P68429 | 41  | VKKPHRFRPGT  |
| 54 | P68429 | 43  | KPHRFRRPGTVA |
| 55 | P68429 | 50  | GTVALREIRKY  |
| 56 | P68429 | 53  | ALREIRKYQKS  |
| 57 | P68429 | 64  | TELLIRKLPFQ  |
| 58 | P68429 | 70  | KLPFQRLVREI  |
| 59 | P68429 | 73  | FQRLVREIAQD  |
| 60 | P68429 | 84  | FKTDLRFQSSA  |
| 61 | P68429 | 117 | AIHAKRVTIMP  |
| 62 | P68429 | 129 | DIQLARRIRGE  |
| 63 | P68429 | 130 | IQLARRIRGER  |
| 64 | P68429 | 132 | LARRIRGERAA  |
| 65 | P68429 | 135 | RIRGERAAAAA  |
| 66 | Q28009 | 501 | GKMDSRGEHRQ  |
| 67 | Q28009 | 505 | SRGEHRQDRRE  |
| 68 | Q28009 | 508 | EHRQDRRERP   |
| 69 | Q28009 | 509 | HRQDRRERPYY  |
| 70 | Q28009 | 511 | QDRRERPYYYY  |
| 71 | Q28009 | 256 | KFGGPRDQGS   |
| 72 | Q28009 | 261 | RDQGSRHDSEQ  |
| 73 | Q28009 | 315 | NLYTDRETGKL  |
| 74 | Q28009 | 358 | VSFATRRADFN  |
| 75 | Q28009 | 359 | SFATRRADFNR  |
